# Supplementary material for: Cdkn2a deficiency promotes adipose tissue browning
Source: PubMed Central journal article supplement — Mol Metab. 2017 Dec 1;8:65–76. doi: 10.1016/j.molmet.2017.11.012 (PMC5985036; doi:10.1016/j.molmet.2017.11.012), 2017-12-01
Supplement: mmc1.pdf [file mmc1.pdf]

Table S1 : List of peptides differentially phosphorylated inCdkn2a +/- and +/- primary adipocytes .

| ID                     | UniprotAccession | Thr                | Ser                  | Sequence       | p1-RyFactor_ranklyCorrelation | p value              | DB KO 1      | DB KO 2      | DB KO 3     | DB WT 1     | DB WT 2     | DB WT 3     | Log2FC           |
|------------------------|------------------|--------------------|----------------------|----------------|-------------------------------|----------------------|--------------|--------------|-------------|-------------|-------------|-------------|------------------|
|                        |                  |                    |                      |                |                               |                      | KO DB        | KO DB        | KO DB       | WT DB       | WT DB       | WT DB       |                  |
| KCCQ_278_289           | Q13555           | [287]              | [280]                | VAAMAHRIQETVE  | 1                             | 0.00426826426062393  | 1.140334606  | 1.177666903  | 0.37319604  | 0.8637325   | 0.8637325   | 0.8637325   | 2.80543288912964 |
| PIGL_2_20              | P06737           | []                 | [15]                 | QKIRKRGKGV     | 2                             | 0.0119380771426202   | 1.589319944  | 0.40203377   | 0.40127465  | 0.8301994   | 0.8301994   | 0.8301994   | 1.4914911774902  |
| VASP_231_244           | P50562           | []                 | [239]                | GAALNVKRGKSEA  | 3                             | 0.02689260823240495  | 1.579775995  | 0.803463842  | 0.038       | 0.7877483   | 0.7877483   | 0.7877483   | 1.6669717335521  |
| TAU_534_536            | P10636           | [529, 534]         | [525, 527, 531]      | GSQRTPLPPTPP   | 4                             | 0.027014989404807804 | 1.361555149  | 1.12658815   | 0.1260875   | 0.7874571   | 0.7874571   | 0.7874571   | 1.8391379498444  |
| EPF_519_531            | P55548           | [526]              | [531]                | GEASGVTPVRVS   | 5                             | 0.0209965400843261   | 1.58922241   | 0.811786413  | -0.0629     | -0.8001427  | 0.7230179   | 0.804142747 | 1.7613232399463  |
| KEPL_766_778           | P17658           | [770, 773]         | [775]                | LEHVTRRTLSMDK  | 91                            | 0.0499704664645719   | -0.143618986 | -1.75228991  | -0.3263630  | 0.849966370 | 0.43404103  | 0.848901272 | 1.6697079588135  |
| RB_242_254             | P06400           | [252]              | [249]                | AVFPGICSPFTRP  | 92                            | 0.0465307459239151   | -0.37749782  | 1.766861558  | -0.096      | 0.81095820  | 0.62920520  | 0.86770791  | 1.50747891240783 |
| RAFI_153_165           | P06469           | [258, 260]         | [257, 259]           | QKQKCTTPHHNM   | 93                            | 0.0433377111799315   | -0.96842891  | 1.403251198  | 0.11718330  | 0.7234620   | 0.8084621   | 1.17853182  | 0.97380512156983 |
| BAD_93_105             | Q02934           | []                 | [97, 99]             | FROGSRASPPNLW  | 94                            | 0.0404847176048655   | -0.384060562 | -1.75702262  | -0.1347031  | 0.810206350 | 0.69331750  | 0.8219539   | 1.8156208505052  |
| RAF1B_172_184          | P61224           | []                 | [179, 180]           | PGQAKKSCSCLL   | 95                            | 0.040303084062326    | -1.59845181  | 0.83789388   | 0.13949580  | 0.81865070  | 0.82408761  | 0.81772524  | 1.82471881252044 |
| DESP_2842_2854         | P13924           | [2853]             | [2843, 2845, 2849]   | RSGRRGSGFATG   | 96                            | 0.0382196415662766   | -1.566846251 | 0.82476295   | 0.089       | 0.77075170  | 0.79983440  | 0.50541181  | 1.04543448627929 |
| LPS_944_956            | Q05469           | [955]              | [950, 951]           | GFPFRPSQSGATQ  | 97                            | 0.0307501722171799   | -1.661667943 | 0.99986672   | 0.0749      | 0.846543550 | 0.879782910 | 0.59021397  | 2.081067852661   |
| NFKB1_230_242          | P13658           | [241]              | [237, 242]           | FVQRRKQGLTTS   | 98                            | 0.0292002016108833   | -1.00709999  | 1.00709999   | 0.11739303  | 0.97137180  | 0.9404150   | 0.68474924  | 1.2062462954649  |
| ANOR_785_797           | P10275           | []                 | [791]                | VMRHKLSQFGWL   | 99                            | 0.023443121408346    | -1.394616213 | 0.727670968  | -0.2662651  | 1.101291250 | 1.8904704   | 1.098374963 | 1.4031319062134  |
| CDNLA_139_151          | P38936           | [145, 148]         | [146]                | GAKRIRGCTMTDF  | 100                           | 0.020128570497036    | -0.202693948 | 1.623882114  | -0.5789778  | 0.76292710  | 0.75446490  | 0.87972129  | 1.8200206785954  |
| RPL1_6317_6329         | P31837           | [6324]             | []                   | VSRRLRLTARSA   | 101                           | 0.010939743359361    | -1.609646181 | -0.613636871 | -0.1874687  | 0.90931420  | 0.530370781 | 0.7113093   | 1.6235357555641  |
| NMD2L_890_902          | Q05586           | [900, 902]         | [890, 896, 897, 901] | SFRRRSSGDTST   | 102                           | 0.0193239785730839   | -1.475269794 | 0.88674885   | -0.0596     | 0.857966720 | 0.97627360  | 0.58005066  | 2.9743814668383  |
| CTR_730_742            | P12569           | []                 | [737, 742]           | FLPRLSLVPSD    | 103                           | 0.018247238589057    | -1.381286244 | 1.031912684  | -0.0395     | 0.81622620  | 0.972799710 | 0.64862631  | 1.8429998129277  |
| COH8_109_121           | P02233           | [117, 118]         | [115]                | QCACRSTTDCG    | 104                           | 0.0168194038591052   | -1.200709623 | 1.241371512  | 0.005       | 0.87968210  | 0.7307900   | 0.846326428 | 1.090623946673   |
| KIF2C_105_118_51066    | Q09661           | [112, 116]         | [109, 111, 115, 118] | EGAKRSRTMTSTVS | 105                           | 0.01481804665870964  | -0.693736533 | 1.565734924  | -0.1820011  | 0.798835540 | 0.728767610 | 0.974669456 | 1.69762365458904 |
| KIF9L_1010_1022        | P46020           | []                 | [1018, 1020, 1023]   | QVFRRSLSSAS    | 106                           | 0.0122964555871091   | -1.250404789 | 1.124504307  | -0.0674     | 0.930531500 | 0.991855160 | 0.654171386 | 1.60929230294937 |
| H2B18_27_40            | P31778           | []                 | [33, 37, 39]         | GKKKRSKRSKESYS | 107                           | 0.0129246208816767   | -1.297421455 | -1.015454769 | -0.1674238  | 0.49028410  | 0.85829451  | 1.131095409 | 1.63291231894775 |
| NOS3_1171_1183         | P29474           | [1171, 1177, 1179] | [1171, 1177, 1179]   | SRRTPQSLQER    | 108                           | 0.012020967900753    | -1.489135742 | 0.713717461  | -0.2887954  | 0.563519411 | 0.50802310  | 0.86743705  | 2.33774481065063 |
| STM_283_295            | Q14965           | [287, 288, 292]    | [283, 284]           | SPRRTTGCTTLY   | 109                           | 0.011124281000071    | -1.365355594 | 0.947698057  | -0.1853491  | 0.916417121 | 0.82816240  | 0.553664007 | 0.7994027296139  |
| KAP2_92_104            | P13861           | [104]              | [92, 99]             | SPFRNRVSCAET   | 110                           | 0.00992489559771336  | -0.780294857 | 1.46321547   | -0.2601446  | 0.913796660 | 0.978843740 | 0.620084345 | 2.68773277865332 |
| CHERL_126_138          | P14220           | []                 | [129, 133]           | GLRRKRYRNL     | 111                           | 0.0093999357340336   | -0.877746514 | 1.44147358   | -0.2107234  | 0.839299720 | 0.803684210 | 0.72184764  | 1.8464088441821  |
| RSE_278_290            | P62753           | []                 | [235, 236, 240]      | IAVRRLSLSSG    | 112                           | 0.0087277066771984   | -1.539957981 | 1.539957981  | -0.4841209  | 0.846715440 | 0.71688910  | 0.75836326  | 1.64778964724126 |
| CACIC1_1974_1986       | Q13936           | []                 | [1975, 1981]         | ASLGRASPALEK   | 113                           | 0.00857784133040493  | -1.43981364  | 1.43981364   | -0.2554791  | 0.884948110 | 0.949621080 | 0.69425024  | 1.04951031011188 |
| NC1_321_333            | P14598           | []                 | [328]                | QDAVRNVDFGLG   | 114                           | 0.0084695102039141   | -1.211449381 | 1.211449381  | -0.15824370 | 0.834627503 | 0.96135303  | 0.72403061  | 1.77776745384232 |
| TYH_65_77              | P07101           | []                 | [71]                 | FIGNRQSLDEAR   | 115                           | 0.0080746266704549   | -1.272020561 | -1.09208621  | -0.1693464  | 0.886650740 | 0.8942870   | 0.75008724  | 2.9476133887887  |
| PTK_439_448            | Q13882           | [445]              | [442, 443, 446]      | ALERLRISFTYE   | 116                           | 0.0084180093109608   | -0.86056928  | 1.432577729  | -0.242191   | 0.904339710 | 0.80875430  | 0.82247295  | 2.4727796401245  |
| AGH2_338_350           | P07550           | []                 | [345, 346]           | ELLERLSRLAY    | 117                           | 0.0070732421293847   | -1.351838563 | 0.947521487  | -0.2387721  | 0.963877610 | 0.95515840  | 0.60510829  | 1.04030367480564 |
| TOP2A_1463_1475        | P11388           | [1470]             | [1469, 1471, 1474]   | RNRKPTSDQSDG   | 118                           | 0.00728297891133003  | -1.350503125 | 0.94830822   | -0.2493882  | 0.79454261  | 0.04203660  | 0.70801008  | 2.6665393921998  |
| ART_05_CGLRRVSLGLRRVSL | NA               | NA                 | NA                   | GLRRVSLGLRRVSL | 119                           | 0.0071118211113086   | -1.034802636 | 1.397226997  | -0.2584848  | 0.812035160 | 0.997790410 | 0.69818494  | 1.12101461807211 |
| SCOT4_808_810          | Q01118           | []                 | [805, 806]           | INRCRQSSLDGQ   | 120                           | 0.00695884739801002  | -1.421021488 | 1.421021488  | -0.3139531  | 0.807593941 | 0.026895107 | 0.745722991 | 1.09606875544406 |
| EPH42_241_253          | P18452           | [248]              | [241]                | LLAKRQGVPLR    | 121                           | 0.0056994899709664   | -1.080981135 | 1.24577958   | -0.24124690 | 0.857284110 | 0.96278790  | 0.747969189 | 1.98200223830081 |
| PTN12_32_44            | Q02029           | [40, 44]           | [39]                 | FAHLRLTLTYRT   | 122                           | 0.00548523024641657  | -1.428917912 | 1.428917912  | -0.37422610 | 0.7886185   | 0.940466130 | 0.7854244   | 1.50410481423777 |
| MYPC1_268_280          | Q14896           | [274]              | [269, 275]           | LAVRRTSLAGGG   | 123                           | 0.0050667733883478   | -1.211593511 | -1.211593511 | -0.266136   | 0.894115620 | 0.972715510 | 0.710991710 | 2.8730043460137  |
| KCF1_307_319           | P31323           | [310]              | [314]                | NRTFRVASCAL    | 124                           | 0.00474821175479004  | -1.021494269 | 1.217165252  | -0.2909195  | 0.883356570 | 0.975469110 | 0.72425283  | 2.81703897216192 |
| VTWC_380_402           | P06004           | [400]              | [393, 397]           | NQGRVSPSPATNL  | 125                           | 0.00407071449184093  | -1.048020388 | 1.248599508  | -0.2907100  | 0.864841810 | 0.98039540  | 0.71781707  | 2.890055175781   |
| NC1_296_308            | P14598           | []                 | [303, 304]           | NRFPFRSSIRNNA  | 126                           | 0.0045976415265274   | -1.171378084 | 1.138784528  | -0.2799921  | 0.88273740  | 0.94879860  | 0.75402545  | 2.839329121294   |
| F381_454_466           | Q10875           | [463]              | [461]                | NRPMRNVPTPA    | 127                           | 0.0040855148403998   | -1.126202448 | 1.130541983  | -0.2961970  | 0.89630770  | 0.94541090  | 0.75097008  | 2.8931714540512  |
| GMB2_708_720           | Q13902           | []                 | [710, 711, 715, 720] | FMSGRVSDVQYS   | 128                           | 0.0036379635454095   | -1.003425121 | 1.241417946  | -0.3574724  | 0.939605911 | 0.03656010  | 0.69939384  | 2.7131731442041  |
| GMB2_427_439           | F47870           | [439]              | [427, 434]           | SLRNRASQKQT    | 129                           | 0.003467884780037    | -0.994698167 | 1.262017965  | -0.3491481  | 0.862636620 | 0.98929440  | 0.7482982   | 1.7493954722414  |
| CTR_161_173            | P13569           | []                 | [168]                | LQARRQDVNALM   | 130                           | 0.0027721324261672   | -1.08036539  | 1.17123695   | -0.36841800 | 0.886501461 | 0.0240710   | 0.751022895 | 2.873931831762   |
| ESR1_160_172           | P01372           | [168]              | [167]                | GGERLASTNDGQ   | 131                           | 0.00271446723590953  | -1.33001864  | -0.749697804 | -0.5451549  | 1.064691540 | 0.654428802 | 0.90150929  | 1.70998326159056 |
| KCNAG_504_516          | P17658           | [515]              | [511]                | ENRRRPSYLPPT   | 132                           | 0.002639280104142    | -1.07590666  | -1.07590666  | -0.3607548  | 0.91539740  | 0.92914310  | 0.77837804  | 2.7954619795616  |
