# Supplementary material for: Cdkn2a deficiency promotes adipose tissue browning
Source: PubMed Central journal article supplement — Mol Metab. 2017 Dec 1;8:65–76. doi: 10.1016/j.molmet.2017.11.012 (PMC5985036; doi:10.1016/j.molmet.2017.11.012), 2017-12-01
Supplement: mmc2.pdf [file mmc2.pdf]

**Table S2 : List of diseases and/or biological functions based on peptide phosphorylation in Cdkn2a +/+ and -/- primary adipocytes.**

| Categories                                                                                                           | Diseases or Functions Annotation        | pValue     | Predicted Activation z-Flags | Molecules | # Molecules                                                                                  |    |
|----------------------------------------------------------------------------------------------------------------------|-----------------------------------------|------------|------------------------------|-----------|----------------------------------------------------------------------------------------------|----|
| Developmental Disorder                                                                                               | Hypertrophy                             | 0.00000000 | Increased                    | 2.516     | ADRB2,AR,CACNA1C,CDKN1A,CFTR,CRK1B1,ESR1,FOXO3,FXR1,MAP2K1,MYBP3,NCF1,NFKB1,NOS3,PDE5A,PRKCB | 16 |
| Cardiovascular Disease, Developmental Disorder, Organismal Injury and Abnormalities                                  | Hypertrophy of heart                    | 0.00000004 | Increased                    | 2.569     | ADRB2,CACNA1C,CDKN1A,CRK1B1,FXR1,MAP2K1,MYBP3,NCF1,NFKB1,NOS3,PDE5A,PRKCB                    | 12 |
| Developmental Disorder, Skeletal and Muscular Disorders                                                              | muscular hypertrophy                    | 0.00000015 |                              | 0.256     | ADRB2,AR,FOXO3,MYBP3,NCF1,NFKB1,NOS3,PDE5A                                                   | 8  |
| Developmental Disorder                                                                                               | hypertrophy of tissue                   | 0.00000036 |                              | 0.539     | ADRB2,AR,ESR1,FOXO3,MYBP3,NCF1,NFKB1,NOS3,PDE5A                                              | 9  |
| Developmental Disorder, Embryonic Development, Organismal Development, Tissue Morphology                             | abnormal morphology of embryonic tissue | 0.00000044 |                              |           | AR,AURKA,CACNA1C,CDC25A,CDKN1A,CFR1,DCX,DSF,ERBB2,ESR1,MAP2K1,MTOR,PTPN12,RAF1,RB1,RBL2      | 16 |
| Developmental Disorder                                                                                               | hypertrophy of cells                    | 0.00000178 |                              | 0.539     | ADRB2,AR,ESR1,FOXO3,MYBP3,NCF1,NFKB1,NOS3,PDE5A                                              | 9  |
| Developmental Disorder                                                                                               | dysplasia of epithelial tissue          | 0.00000074 |                              |           | ESR1,RB1,RBL2                                                                                | 3  |
| Developmental Disorder                                                                                               | Growth Failure                          | 0.0000425  | Increased                    | 2.936     | AURKA,CDC25A,CDKN1A,CFTR,CSF3R,MTOR,NFKB1,NOS3,PTPN12,RAF1,RB1,RBL2                          | 12 |
| Cardiovascular Disease, Developmental Disorder, Organismal Injury and Abnormalities, Skeletal and Muscular Disorders | hypertrophy of cardiac muscle           | 0.000226   |                              | 1.067     | MYBP3,NCF1,NFKB1,PDE5A                                                                       | 4  |
| Developmental Disorder, Organismal Injury and Abnormalities, Reproductive System Disease                             | hypertrophy of uterus                   | 0.000238   |                              |           | AR,ESR1                                                                                      | 2  |
| Developmental Disorder                                                                                               | dysplasia                               | 0.000305   |                              | 0.991     | ESR1,RB1,RBL2,RPS6                                                                           | 4  |
