# Supplementary material for: Cdkn2a deficiency promotes adipose tissue browning
Source: PubMed Central journal article supplement — Mol Metab. 2017 Dec 1;8:65–76. doi: 10.1016/j.molmet.2017.11.012 (PMC5985036; doi:10.1016/j.molmet.2017.11.012), 2017-12-01
Supplement: mmc3.pdf [file mmc3.pdf]

|                    |                                                                                     |                    |                     |               |
|--------------------|-------------------------------------------------------------------------------------|--------------------|---------------------|---------------|
| ENSMUST00000127236 | 2073.081604 -0.45554728;0.197058020 -2.31147192;0.020791909;0.0921486842309573      | ENSMUST00000127236 | ENSMUSG00000004213  | Nudt3         |
| ENSMUST00000036825 | 169.10899910.973668883;0.421233859 -2.311468706;0.020806979;0.0921971573820747      | ENSMUST00000036825 | ENSMUST00000034891  | Sncb          |
| ENSMUST00000015846 | 262.9660756;0.499913439;0.216271038 -2.311513562;0.020804504;0.0921971573820747     | ENSMUST00000015846 | ENSMUSG00000015702  | Anxa9         |
| ENSMUST00000130485 | 1240.553428 -0.56458700 -2.244252676 -2.31148746;0.020805944;0.0921971573820747     | NA                 | ENSMUST00000130485  | E130307A14Rik |
| ENSMUST00000145971 | 532.458928;0.416343323;0.180128794 -2.311364621;0.020812723;0.092205601128248       | ENSMUST00000145971 | ENSMUSG00000081771  | Nup85         |
| ENSMUST00000140986 | 2031.057100 -0.60595117;0.262158942 -2.31138854 -0.020811402;0.092205601128248      | ENSMUST00000140986 | ENSMUST00000025013  | Nespas        |
| ENSMUST00000151472 | 29.69158969 -0.98284744;0.425224905 -2.31135906 -0.020813030;0.092205601128248      | ENSMUST00000151472 | ENSMUSG00000086537  | Elavl2        |
| ENSMUST00000107120 | 27.25646909 -1.04480111;0.452037265 -2.31131634 -0.020815388;0.092209991526391      | ENSMUST00000107120 | ENSMUST00000008489  | Uba2          |
| ENSMUST00000134856 | 3507.494493 -0.36682779;0.158716715 -2.31121083 -0.020821210;0.092229686933511      | ENSMUST00000134856 | ENSMUSG00000052997  | Sh3d19        |
| ENSMUST00000107664 | 7304.856501 -0.432598063;0.187186449 -2.311054384;0.020829851;0.0922473565379177    | ENSMUST00000107664 | ENSMUST00000028082  | Dlst          |
| ENSMUST00000053811 | 14171.88176 -0.41689645 -0.180393537 -2.31103873 -0.020830715;0.0922473565379177    | ENSMUST00000053811 | ENSMUSG00000004789  | Fam219a       |
| ENSMUST00000130288 | 687.3130106 -0.490896280;0.212409663 -2.311082617;0.020828291;0.0922473565379177    | ENSMUST00000130288 | ENSMUST00000028439  | Fam214b       |
| ENSMUST00000107956 | 4031.538038 -0.32788043;0.141871646 -2.31110613;0.020826992;0.0922473565379177      | ENSMUST00000107956 | ENSMUSG00000036002  | Nrxn3         |
| ENSMUST00000057634 | 16.95455721 -1.048987538;0.453931595 -2.310893421;0.020838742;0.092271992624256     | ENSMUST00000057634 | ENSMUST00000057634  | Mtch2         |
| ENSMUST00000148936 | 824.7765187 -0.44456262;0.192377459 -2.31088726 -0.020839082;0.092271992624256      | ENSMUST00000148936 | ENSMUST00000027282  | Mbp           |
| ENSMUST00000114676 | 24.34929175 -0.982917209;0.425350763 -2.310839182;0.020841739;0.092277855855497     | ENSMUST00000114676 | ENSMUSG00000041607  | Adsl          |
| ENSMUST00000163575 | 624.3928944 -0.72892823;0.315497532 -2.31040866 -0.020865539;0.0923771223579049     | ENSMUST00000163575 | ENSMUST00000022407  | Lox4          |
| ENSMUST00000164014 | 296.0846205 -0.491619594;0.212793826 -2.310309478;0.020871026;0.0923925999575863    | ENSMUST00000164014 | ENSMUST00000025185  | Cdc25b        |
| ENSMUST00000141732 | 134.5327912 -0.82918577;0.358913725 -2.31026488 -0.020873493;0.0924001085346779     | ENSMUST00000141732 | ENSMUSG00000027330  | Phxa1a        |
| ENSMUST00000049845 | 12656.74554 -0.43280220 -0.187340890 -2.31023886 -0.020874933;0.092403695521045     | ENSMUST00000049845 | ENSMUST00000030084  | B9d1          |
| ENSMUST00000140548 | 832.4507345 -0.44484937 -0.192558020 -2.31020952 -0.020876557;0.092404145755647     | ENSMUST00000140548 | ENSMUST00000040548  | Nup93         |
| ENSMUST00000109547 | 5163.810792 -0.45342968 -0.196278161 -2.31013821 -0.020880503;0.0924127999006183    | ENSMUST00000109547 | ENSMUST000000109547 | NA            |
| ENSMUST00000107610 | 1912.800114 -0.81357762;0.352194801 -2.31002168 -0.020886953;0.0924352328352026     | ENSMUST00000107610 | ENSMUST00000017610  | NA            |
| ENSMUST00000029723 | 7304.4700330 -0.432465000;0.187216572 -2.309971785 -0.020889716;0.092441345728409   | ENSMUST00000029723 | ENSMUST00000029723  | NA            |
| ENSMUST00000146042 | 136.0031621 -0.782573131;0.338791551 -2.309895660;0.020893931;0.0924538873316781    | ENSMUST00000146042 | ENSMUSG00000025504  | Eps8l2        |
| ENSMUST00000173928 | 14.89198350 -1.04846561 -0.453949751 -2.30965125 -0.020907469;0.0925076718819743    | ENSMUST00000173928 | ENSMUST00000070735  | Msh5          |
| ENSMUST00000156264 | 241.9532296 -0.54937009;0.237868209 -2.30955661 -0.020912713;0.0925247599921246     | ENSMUST00000156264 | ENSMUST000000156264 | Vrk2          |
| ENSMUST00000061155 | 361.7503966 -0.409991829;0.177524870 -2.309489529;0.020916432;0.09253273696103      | ENSMUST00000061155 | ENSMUSG00000032489  | Kif9          |
| ENSMUST00000142398 | 3884.557358 -0.40367063 -0.14790414 -2.30945523 -0.020918320;0.09253273696103       | ENSMUST00000142398 | ENSMUST00000015714  | Cers2         |
| ENSMUST00000134082 | 354.3267447 -0.44235210;0.191540082 -2.30944929 -0.020918662;0.09253273696103       | ENSMUST00000134082 | ENSMUST00000028470  | Hint2         |
| ENSMUST00000156485 | 1669.648880 -0.592915544 -0.256742994 -2.309373803;0.020922847;0.092545118915801    | ENSMUST00000156485 | ENSMUST00000032531  | Amotl2        |
| ENSMUST00000149831 | 368.5940898 -0.65279945 -0.282685569 -2.30927761 -0.020928181;0.0925564756763207    | ENSMUST00000149831 | ENSMUST00000046079  | Lrrc8d        |
| ENSMUST00000173210 | 1924.7349130 -0.502635423 -0.217656872 -2.309301875 -0.020926835;0.0925564756763207 | ENSMUST00000173210 | ENSMUST00000016611  | Hoxc6         |
| ENSMUST00000112992 | 5240.231809;0.395752688;0.171377268 -2.309248430;0.020929799;0.0925575153036178     | ENSMUST00000112992 | ENSMUST00000026883  | Dab2ip        |
| ENSMUST00000114335 | 20306.162830 -0.332280856;0.143915419 -2.308862096;0.0209512340;0.092646186261334   | ENSMUST00000114335 | ENSMUST00000029106  | Add1          |
| ENSMUST00000112664 | 603.4794341 -0.365310685;0.1582230462 -3.08833604;0.020958216;0.092647509536703     | ENSMUST00000112664 | ENSMUST00000022617  | Chkb          |
| ENSMUST00000155431 | 1134.585861 -0.37638844;0.163033884 -2.30865161 -0.020962920;0.0926856136223283     | ENSMUST00000155431 | ENSMUST000000155431 | 311002H16Rik  |
| ENSMUST00000146537 | 1326.102948 -0.386891919;0.1767596322 -3.08474991;0.020977232;0.092728658223255     | ENSMUST00000146537 | ENSMUST00000026842  | Abi1          |
| ENSMUST00000072646 | 1473.1218130 -0.410630072;0.1778817502 -3.08444080;0.020974449;0.0927243326714529   | ENSMUST00000072646 | ENSMUST00000072646  | Exoc3l4       |
| ENSMUST00000145727 | 5604.8549320 -0.438095861 -0.189781924 -2.308417208;0.020975942;0.092748076581556   | ENSMUST00000145727 | ENSMUST00000058388  | Phtf1         |
| ENSMUST00000170060 | 751.83842340 -0.417050571 -0.180669809 -2.308357846 -0.020979241;0.0927332640387274 | ENSMUST00000170060 | ENSMUST00000012771  | Zfp839        |
| ENSMUST00000110533 | 1520.265005 -0.336725862;0.1458776662 -3.082756240;0.020983811;0.0927473370941126   | ENSMUST00000110533 | ENSMUST00000039219  | Arid4b        |
| ENSMUST00000111325 | 2499.077021 -0.325263124;0.140922953 -2.308091880;0.020994026;0.0927863601224205    | ENSMUST00000111325 | ENSMUST00000019283  | Sdr39u1       |
| ENSMUST00000121972 | 6.66994148 -0.37462892;0.449508701 -2.307992902;0.020995531;0.0928045589954102      | ENSMUST00000121972 | ENSMUST00000031698  | Mylik3        |
| ENSMUST00000176309 | 2792.853488 -0.375551792;0.154928591 -2.307848992;0.021007536;0.0928338079747014    | ENSMUST00000176309 | NA                  | NA            |
| ENSMUST00000035735 | 15809.24070 -0.045336085 -0.452960367 -2.307787084;0.021010981;0.0928428994313738   | ENSMUST00000035735 | ENSMUSG00000040280  | Ndufa4l2      |
| ENSMUST00000128059 | 29837.34310 -0.31874372;0.138118760 -2.30775114;0.021012981;0.0928456072786755      | ENSMUST00000128059 | ENSMUST00000128059  | Akr1a1        |
| ENSMUST00000109278 | 4951.492157 -0.36743648 -0.159223189 -2.30768197 -0.021016831;0.0928503544953315    | ENSMUST00000109278 | ENSMUST00000042178  | Ttc1          |
| ENSMUST00000126738 | 130.0655668 -0.69471918 -0.301044488 -2.30769606 -0.021016047;0.0928503544953315    | ENSMUST00000126738 | ENSMUST00000012678  | 6330416G13Rik |
| ENSMUST00000164780 | 645.6976985 -0.373674851 -0.161936225 -2.307543290;0.021024551;0.0928538118272652   | ENSMUST00000164780 | NA                  | NA            |
| ENSMUST00000162091 | 24.86572641 -1.04384598 -0.452349207 -2.30761095 -0.021020784;0.0928538118272652    | ENSMUST00000162091 | ENSMUSG00000033060  | Lmo7          |
| ENSMUST00000105392 | 3565.472265 -0.57381244 -0.248666046 -2.30756251 -0.021023481;0.0928538118272652    | ENSMUST00000105392 | NA                  | NA            |
| ENSMUST00000042556 | 3565.472265 -0.57381244 -0.248666046 -2.30756251 -0.021023481;0.0928538118272652    | ENSMUST00000042556 | ENSMUSG00000042556  | Pwp2          |
| ENSMUST00000151766 | 1722.251351 -0.29919336 -0.129658081 -2.30755661 -0.021023809;0.0928538118272652    | ENSMUST00000151766 | ENSMUST00000018565  | Elp5          |
| ENSMUST00000080878 | 172.5838547 -0.98323553 -0.426110280 -2.30746728 -0.021028783;0.0928663738885826    | ENSMUST00000080878 | ENSMUST00000080728  | Gsjp1         |
| ENSMUST00000064395 | 1911.651457 -0.18256214 -0.352161800 -2.30735457 -0.021035061;0.092887966953941     | ENSMUST00000064395 | ENSMUST00000052512  | Nav2          |
| ENSMUST00000174004 | 3918.592190 -0.451958581 -0.195888040 -2.307229072;0.021042053;0.09287217096491415  | ENSMUST00000174004 | ENSMUST00000054088  | 1600012H06Rik |
| ENSMUST00000169955 | 1337.353847 -0.400339294 -0.1735208792 -2.307153439 -0.021046267;0.0929251874248504 | ENSMUST00000169955 | ENSMUST00000023952  | Gtbp2         |
| ENSMUST00000077093 | 1444.193410 -0.310011187;0.1343743092 -2.307071856 -0.021050814;0.0929323079533924  | ENSMUST00000077093 | ENSMUST00000077093  | Krba1         |
| ENSMUST00000124457 | 1239.451967 -0.469555897;0.2035308932 -3.070497530 -0.021052046;0.0929323079533924  | ENSMUST00000124457 | ENSMUST00000042625  | Safb2         |
| ENSMUST00000112633 | 42.99683506 -1.047413764 -0.454004673 -2.307055030;0.021051752;0.0929323079533924   | ENSMUST00000112633 | ENSMUST000000112633 | Kcnj3         |
| ENSMUST00000161889 | 88.10264527 -0.88577682 -0.383949741 -2.30701241 -0.021054127;0.092935364893127     | ENSMUST00000161889 | ENSMUST00000030657  | Xylt1         |
| ENSMUST00000128738 | 758.0749827 -0.625496875 -0.271144344 -2.306877826 -0.021061631;0.0929623566196591  | ENSMUST00000128738 | ENSMUST00000128738  | Phyh          |
| ENSMUST00000120259 | 311.6916828 -0.641011600 -0.277892571 -2.30668850 -0.021077219;0.092966964262683    | ENSMUST00000120259 | ENSMUST00000071369  | Map3k5        |
| ENSMUST00000151492 | 1070.103579 -0.53342782 -0.231251844 -2.30669651 -0.021077144;0.092966964262683     | ENSMUST00000151492 | ENSMUST00000039275  | Foxk2         |
| ENSMUST00000146442 | 586.5807169 -0.43424991;0.188262034 -2.30662499 -0.021075734;0.0930062002941176     | ENSMUST00000146442 | ENSMUST00000015766  | Eps8          |
| ENSMUST00000081232 | 179.1989366 -0.81219947;0.352166401 -2.30629460 -0.021094176;0.0930814429619317     | ENSMUST00000081232 | ENSMUST00000081320  | Picg2         |
| ENSMUST00000154315 | 66.59244821 -0.855399250;0.370907065 -2.306236064;0.021097445;0.093087360110817     | ENSMUST00000154315 | ENSMUST00000032064  | Dxwdc1        |
| ENSMUST00000155291 | 962.4512823 -0.477473012;0.2070711602 -3.05840230;0.021119561;0.0931811700229847    | ENSMUST00000155291 | ENSMUST00000055291  | Slc25a36      |
| ENSMUST00000066679 | 1932.783391 -0.442364851 -0.1918475702 -3.05814202;0.021121016;0.0931814456042478   | ENSMUST00000066679 | ENSMUST00000066279  | Sh3bp4        |
| ENSMUST00000028648 | 198.2511789 -0.834058220;0.361725575 -2.30577619 -0.021123140;0.09318467580107638   | ENSMUST00000028648 | ENSMUST00000028648  | Syt13         |
| ENSMUST00000046941 | 488.3136239 -0.482533692;0.209279026 -2.305695413;0.021127657;0.0931984567949208    | ENSMUST00000046941 | ENSMUST00000046941  | Rnf122        |
| ENSMUST00000173421 | 1204.676042 -0.504664878 -0.18891793 -2.305544996 -0.021136069;0.093223741400836    | ENSMUST00000173421 | ENSMUST00000016611  | Hoxc6         |
| ENSMUST00000176669 | 97.13638771 -0.92845481 -0.402699316 -2.30555596 -0.021135456;0.093223741400836     | ENSMUST00000176669 | ENSMUST00000076669  | Satb1         |
| ENSMUST00000112451 | 24442.33700 -0.444516408 -0.192807607 -2.30549202 -0.021139032;0.093230198635535    | ENSMUST00000112451 | ENSMUST00000040990  | Sh3kbp1       |
| ENSMUST00000114338 | 23017.44464 -0.331504475 -0.143791835 -2.305447138;0.021141544;0.0932351289551204   | ENSMUST00000114338 | ENSMUST00000014338  | Add1          |
| ENSMUST00000001108 | 23026.53795 -0.331255246 -0.143694629 -2.305272280;0.021153280;0.09327133918768     | ENSMUST00000001108 | ENSMUST00000001108  | Add1          |
| ENSMUST00000091708 | 59.67935261 -0.865921977;0.375605482 -3.05126351 -0.021159498;0.0932020099053289    | ENSMUST00000091708 | ENSMUST00000091708  | Hist1h2al     |
| ENSMUST00000176971 | 675.5837688 -0.731087424 -0.371169382 -2.305037832 -0.021164454;0.0933177161468516  | ENSMUST00000176971 | ENSMUST00000028487  | Bnc2          |
| ENSMUST00000020501 | 8459.135404 -0.32908516 -0.142771445 -2.30497889 -0.021167755 -0.09332121045974     | ENSMUST00000020501 | ENSMUST00000020501  | Sumo3         |
| ENSMUST00000108050 | 4061.0524120 -0.517162870;0.224387645 -2.304774262;0.021179219;0.0933643606961809   | ENSMUST00000108050 | ENSMUST00000028439  | Fam219a       |
| ENSMUST00000108049 | 4061.0524120 -0.517162870;0.224387645 -2.304774262;                                 |                    |                     |               |

|                                                                              |                                                                                |                      |                      |            |
|------------------------------------------------------------------------------|--------------------------------------------------------------------------------|----------------------|----------------------|------------|
| ENSMUST00000131077                                                           | 1143.6593140.507797559.0.220564004.2.302268501.0.0213200340.0937565946138039   | ENSMUST00000131077   | ENSMUSG000000039382  | Wdr45      |
| ENSMUST00000024976                                                           | 2360.695306-.32770165.0.142350238-.2.30208010.0.0213306550.0937971332788466    | ENSMUST00000024976   | ENSMUST00000024160   | Spb3b      |
| ENSMUST00000138683                                                           | 7392.980473-.37754930.0.164016522-.2.30189801.0.0213409240.0938330758709036    | ENSMUST00000138683   | ENSMUSG00000032997   | Chpf       |
| ENSMUST00000155728                                                           | 256.2065089-.556414620.0.241721249-.2.30188544.0.0213416330.0938330758709036   | ENSMUST00000155728   | ENSMUSG00000155728   | Vrk2       |
| ENSMUST00000138304                                                           | 723.5832470-.518740660.0.225362838-.2.30180215.0.0213463230.0938475689232419   | ENSMUST00000138304   | ENSMUSG00000052446   | Zfp961     |
| ENSMUST00000124934                                                           | 25.69929134-.102305161.0.444478634-.2.30168906.0.0213527130.0938694555650142   | ENSMUST00000124934   | ENSMUSG00000026447   | Pik3c2b    |
| ENSMUST00000168873                                                           | 439.98038330.463513311.0.2013930472.301535819.0.0213613630.0938938891534642    | ENSMUST00000168873   | NA                   | NA         |
| 24396.84078-.444983650.0.193343714-.2.30151602.0.0213624800.0938938891534642 |                                                                                | ENSMUST00000112449   | NA                   | NA         |
| ENSMUST00000075250                                                           | 749.3393794-.67899896.0.295021349-.2.30152483.0.0213619830.0938938891534642    | ENSMUST00000075250   | NA                   | NA         |
| ENSMUST00000112447                                                           | 24404.51358-.4450066480.0.193362112-.2.30141512.0.021368170.093912763479464    | ENSMUST00000112447   | ENSMUSG00000040990   | Sh3kbp1    |
| ENSMUST00000127847                                                           | 937.0231350.5150324030.0.2238015662.3012904310.0213752200.0939234408483084     | ENSMUST00000127847   | ENSMUSG00000039382   | Wdr45      |
| ENSMUST00000162596                                                           | 665.88924230.3612915730.0.1569964192.3012727020.0213762210.0939234408483084    | ENSMUST00000162596   | ENSMUST00000162596   | Alg9       |
| ENSMUST00000136552                                                           | 558.6155575-.431117668.0.187360560-.2.30132041.0.0213735260.0939234408483084   | ENSMUST00000136552   | ENSMUSG00000034285   | Nipsnap1   |
| ENSMUST00000093371                                                           | 558.6155575-.431117668.0.187360560-.2.30132041.0.0213735260.0939234408483084   | ENSMUST00000093371   | NA                   | NA         |
| ENSMUST00000151142                                                           | 228.78649680.587057094.0.255106664.2.3012221050.0213790800.0939298324224765    | ENSMUST00000151142   | ENSMUSG00000073888   | Ccl27a     |
| ENSMUST00000120900                                                           | 351.35509720.649985777.0.2824910182.3009077570.0213968450.09400171402230507    | ENSMUST00000120900   | ENSMUST00000120900   | Mmp27      |
| ENSMUST00000074976                                                           | 93.94855654.903270194.0.3926143862.300654851.0.0214111670.0940583732192148     | ENSMUST00000074976   | ENSMUSG00000063954   | Hist2h2aa2 |
| ENSMUST00000118365                                                           | 337.3144740-.0.579754300.0.252007974-.2.30053952.0.0214176720.09408085998741   | ENSMUST00000118365   | ENSMUSG00000018365   | Card6      |
| ENSMUST00000133198                                                           | 364.72695950.5257236650.0.2285523772.3002327550.0214350370.0941509554337517    | ENSMUST00000133198   | ENSMUSG00000024163   | Mdk8ip3    |
| ENSMUST00000155874                                                           | 538.3074070-.0.54016775.0.234844159-.2.30011149.0.0214419040.094168509579947   | ENSMUST00000155874   | ENSMUSG000000155874  | Mapk56     |
| ENSMUST00000127916                                                           | 41.15935356-.873753520.0.379875767-.2.30010335.0.0214423650.094168509579947    | ENSMUST00000127916   | ENSMUST00000127916   | Cy5b5r1    |
| ENSMUST00000146807                                                           | 62.42835660-.95234912.0.414047105-.2.30009849.0.0214426400.094168509579947     | ENSMUST00000146807   | ENSMUSG00000026888   | Grb14      |
| ENSMUST00000155468                                                           | 1180.295462-.0.34564530.0.150377911-.2.30004062.0.0214459180.094168512001581   | ENSMUST00000155468   | ENSMUSG00000004610   | Etfb       |
| ENSMUST00000172824                                                           | 1356.765279.0.312782520.0.135990118-.2.30003859.0.0214460330.094168512001581   | ENSMUST00000172824   | ENSMUSG00000031558   | Slt2       |
| ENSMUST00000144569                                                           | 9602.2343990.445946466.0.193907471.2.2997900180.0214601190.09422401802433      | ENSMUST00000144569   | ENSMUSG00000026822   | Lrr2       |
| ENSMUST00000147302                                                           | 12.12115556.1.0430521830.4535517282.2997424930.0214628130.094229663486291      | ENSMUST00000147302   | ENSMUSG00000035696   | Rnf38      |
| ENSMUST00000132283                                                           | 316.4755534-.0.589624980.0.256429919-.2.29936111.0.0214844420.09431227781877   | ENSMUST00000132283   | ENSMUST00000027993   | Trim2      |
| ENSMUST00000036370                                                           | 260.8977188-.0.55472836.0.241251995-.2.29937316.0.0214837580.09431227781877    | ENSMUST00000036370   | ENSMUSG00000033450   | Tagap      |
| ENSMUST00000071812                                                           | 900.7842341-.0.763379930.0.332011112-.2.29926020.0.0214901680.0943311948883506 | ENSMUST00000071812   | ENSMUSG00000028068   | Ilgap3     |
| ENSMUST00000171835                                                           | 65.339070060.7856237630.0.3417043072.299133340.0214973690.0943566146515742     | ENSMUST00000171835   | ENSMUSG00000049281   | Scn3b      |
| ENSMUST00000129147                                                           | 177.8318892-.0.816468900.0.355165631-.2.29883984.0.0215140350.09442330739994   | ENSMUST00000129147   | ENSMUSG00000033994   | Timeless   |
| ENSMUST00000125883                                                           | 1008.796996-.0.616201190.0.268059857-.2.29874475.0.0215194370.09441086746208   | ENSMUST00000125883   | ENSMUSG00000039356   | Exosc2     |
| ENSMUST00000032501                                                           | 1634.7182370.505819140.0.2200573472.2985787380.0215288720.094472090030606      | ENSMUST00000032501   | ENSMUSG00000030351   | Tspan11    |
| ENSMUST00000034431                                                           | 489.25820260.4355281990.1894803392.2985403150.0215310560.0944742090303606      | ENSMUST00000034431   | ENSMUSG00000031953   | Tmem170    |
| ENSMUST00000176103                                                           | 3367.9937310.5290450990.0.2301659702.2985374360.0215312190.0944742090303606    | ENSMUST00000176103   | ENSMUSG00000029306   | Hbp1       |
| ENSMUST00000118810                                                           | 2204.086583-.0.405844940.0.176574624-.2.29843300.0.0215371560.0944940627790932 | ENSMUST00000118810   | ENSMUSG00000018666   | Chk1       |
| ENSMUST00000050672                                                           | 3444.1722130.0.360012680.0.156635839-.2.298405580.0215387100.0944940627790932  | ENSMUST00000050672   | ENSMUST00000020738   | Sumo2      |
| ENSMUST00000125385                                                           | 253.58489030.4751490740.0.2067321652.2983800020.0215401700.0944948957996638    | ENSMUST00000125385   | ENSMUST00000125385   | Zfp777     |
| ENSMUST00000105663                                                           | 2311.755316-.0.593736070.0.258338686-.2.29828555.0.0215455410.094512627872319  | ENSMUST00000105663   | ENSMUSG00000028948   | Nol9       |
| ENSMUST00000027067                                                           | 928.1348271-.0.709937330.0.308902598-.2.29825625.0.0215472080.0945133778398939 | ENSMUST00000027067   | ENSMUSG00000025934   | Gsta3      |
| ENSMUST00000137841                                                           | 5131.450821-.0.35092247.0.152699045-.2.29813141.0.0215543100.094538338621243   | ENSMUST00000137841   | ENSMUSG00000020265   | Sumo3      |
| ENSMUST00000103013                                                           | 6733.966070-.0.32033914.0.139407080-.2.29786854.0.0215692720.0945930418111259  | ENSMUST00000103013   | ENSMUSG00000039230   | Tbcd       |
| ENSMUST000000089140                                                          | 8212.422111-.0.28435528.0.123747733-.2.29786259.0.0215696100.0945930418111259  | ENSMUST000000089140  | ENSMUSG00000089140   | Nsf11c     |
| ENSMUST00000124564                                                           | 227.34044550.4887263360.0.2126952322.2977777590.0215744510.0946018703320905    | ENSMUST00000124564   | ENSMUSG00000020474   | Polm       |
| ENSMUST00000148991                                                           | 658.2798168-.0.58745667.0.255660557-.2.29779940.0.0215732080.0946018703320905  | ENSMUST00000148991   | ENSMUSG00000026827   | Gpd2       |
| ENSMUST00000042775                                                           | 804.20341590.3989329830.1736207727.2977267060.0215737480.0946083743293966      | ENSMUST00000042775   | ENSMUSG00000039873   | Neurl2     |
| ENSMUST00000163889                                                           | 2412.1324260.3624105960.1577301082.2976627610.0215809900.0946181436350754      | ENSMUST00000163889   | ENSMUSG00000016389   | Rabggt2    |
| ENSMUST00000139468                                                           | 1402.408148-.0.35003702.0.152349507-.2.29759209.0.0215850160.0946295931126348  | ENSMUST00000139468   | ENSMUSG00000026427   | Eif2d      |
| ENSMUST00000152877                                                           | 1138.5731830.3581574080.1552128622.2971639550.0216094180.09473036785005418     | ENSMUST00000152877   | ENSMUSG00000052877   | Ing3       |
| ENSMUST00000111307                                                           | 1651.114655-.0.44033314.0.191688382-.2.29713003.0.0216113520.0947326407540882  | ENSMUST00000111307   | ENSMUSG00000025534   | Gusb       |
| ENSMUST00000115044                                                           | 8.305823995.1.0080757340.4388692762.2969840650.0216196780.0947505183162482     | ENSMUST00000115044   | ENSMUSG00000015044   | Muc13      |
| ENSMUST00000023520                                                           | 8.305823995.1.0080757340.4388692762.2969840650.0216196780.0947505183162482     | ENSMUST00000023520   | ENSMUSG00000022824   | Muc13      |
| ENSMUST00000123570                                                           | 3112.384804-.0.422251930.0.183825028-.2.29703179.0.0216169560.0947505183162482 | ENSMUST00000123570   | ENSMUSG00000027479   | Mapre1     |
| ENSMUST00000099061                                                           | 51.64934787-.0.871275310.0.379323109-.2.29692127.0.0216232610.0947600127912817 | ENSMUST00000099061   | ENSMUSG00000074709   | Cass4      |
| ENSMUST00000107446                                                           | 6019.9642100.3457390290.0.150526421.2.2968660690.0216264110.0947676104528477   | ENSMUST00000107446   | ENSMUSG00000028041   | Adam15     |
| ENSMUST00000034287                                                           | 627.59249660.5070038680.0.2207421782.2968146460.0216293450.0947742637079367    | ENSMUST00000034287   | ENSMUSG00000031828   | Khlh36     |
| ENSMUST00000129523                                                           | 814.1340925-.0.57958051.0.252360597-.2.296636340.0216395230.0948002375291625   | ENSMUST00000129523   | ENSMUSG000000129523  | Amdhd2     |
| ENSMUST00000138515                                                           | 107.8385584-.0.901914900.0.392780305-.2.29665350.0.0216385440.0948002375291625 | ENSMUST00000138515   | ENSMUSG00000020333   | Acsl6      |
| ENSMUST00000127661                                                           | 42.68159154.0.914321401.0.3981126362.2966399890.0216393150.0948002375291625    | ENSMUST00000127661   | ENSMUSG00000029605   | Plch2      |
| ENSMUST00000121705                                                           | 1902.1397180.2815490360.0.1225955382.2965683820.0216430400.09481103100445519   | ENSMUST00000121705   | ENSMUSG00000030805   | Stx4a      |
| ENSMUST00000143725                                                           | 1750.754281-.0.48467208.0.211049623-.2.29648400.0.0216482220.0948240307529520  | ENSMUST00000143725   | ENSMUSG000000143725  | Mprp50     |
| ENSMUST00000081349                                                           | 2960.249695-.0.304435220.0.132566787-.2.29646679.0.0216492050.0948240307529520 | ENSMUST00000081349   | ENSMUSG00000044042   | Fmn1       |
| ENSMUST00000115157                                                           | 4274.4654130.0.468315310.0.203930924-.2.29644090.0.0216506804.0948243024496382 | ENSMUST00000115157   | ENSMUSG00000029362   | Tmem209    |
| ENSMUST00000143438                                                           | 5411.833992-.0.44285507.0.192849287-.2.29637912.0.0216542130.0948319866649849  | ENSMUST00000143438   | ENSMUSG00000004667   | Polr2e     |
| ENSMUST00000106793                                                           | 2194.0105680.4007127410.174499051.2.2963605710.0216552730.0948319866649849     | ENSMUST00000106793   | NA                   | NA         |
| ENSMUST00000155672                                                           | 3489.830472-.0.38059212.0.165743339-.2.29627399.0.0216602200.0948474421742917  | ENSMUST00000155672   | ENSMUSG00000004169   | Ppp2r2d    |
| ENSMUST00000125702                                                           | 232.2572199-.0.59019221.0.257030437-.2.29619580.0.0216646880.0948607998547651  | ENSMUST00000125702   | ENSMUSG00000014218   | Cox10      |
| ENSMUST00000160896                                                           | 1950.0672110.4360941660.1899253642.2961344200.0216681960.0948637482221251      | ENSMUST00000160896   | ENSMUSG00000015127   | Unkl       |
| ENSMUST00000115158                                                           | 1950.0672110.4360941660.1899253642.2961344200.0216681960.0948637482221251      | ENSMUST00000115158   | NA                   | NA         |
| ENSMUST00000063033                                                           | 418.6334031-.0.561750170.0.244655636-.2.2960851390.0216710140.094869876697584  | ENSMUST00000063033   | ENSMUSG00000020389   | Cdk13      |
| ENSMUST00000048716                                                           | 1129.833106-.0.626596350.0.272913592-.2.29595142.0.0216786580.0948971343032131 | ENSMUST00000048716   | ENSMUSG00000037946   | Fgd3       |
| ENSMUST00000055425                                                           | 546.8636150.4363698830.1900640232.2959099520.0216810300.0949013084699058       | ENSMUST00000055425   | ENSMUSG00000058388   | Phf11      |
| ENSMUST00000025842                                                           | 536.3417104.0.1004332540.4374772592.2957601770.0216895970.0949260704122644     | ENSMUST00000025842   | ENSMUSG00000025842   | Gal        |
| ENSMUST00000105393                                                           | 281.2924290.0.558547382.0.2433029262.2956870680.0216937800.0949260704122644    | ENSMUST00000105393   | ENSMUSG00000000732   | Icol1      |
| ENSMUST00000029416                                                           | 4490.5285400.0.4669954490.0.2024195092.2957259660.0216915540.0949260704122644  | ENSMUST00000029416   | ENSMUSG00000027829   | Ccm1f      |
| ENSMUST00000125354                                                           | 252.8437808.0.503260970.0.219218507-.2.295704790.0216927650.0949260704122644   | ENSMUST00000125354   | ENSMUSG00000012354   | Gm14005    |
| ENSMUST00000109986                                                           | 1919.4067770.3051213080.0.1329052492.2957807710.0216884220.0949260704122644    | ENSMUST00000109986   | ENSMUSG00000037110   | Ralgap2    |
| ENSMUST00000121929                                                           | 11.15305070.1.042053970.453932966-.2.29561202.0.0216980740.0949386533175538    | ENSMUST00000121929   | ENSMUSG0000003175538 | Gm11424    |
| ENSMUST00000125348                                                           | 62.892944420.87509931610.381212894.2.2955497400.0217016390.0949480417885556    | ENSMUST00000125348   | ENSMUSG00000038208   | Pgpr3      |
| ENSMUST00000159995                                                           | 693.6440290.5125358840.0.2232799872.2954850980.0217035290.0949580223097229     | ENSMUST00000159995   | ENSMUSG00000030927   | Agf1       |
| ENSMUST00000044097                                                           | 3490.270914-.0.38020266.0.165639084-.2.29536806.0.0217120930.094981125383251   | ENSMUST00000044097   | ENSMUSG000000041097  | Ppp2r2d    |
| ENSMUST0000000043722                                                         | 60052.263150.5059916720.220444764.2.2953217940.0217146890.0949865074610121     | ENSMUST0000000043722 | ENSMUSG00000034722   | Lgals3bp   |
| ENSMUST00000099538                                                           | 8427.961890-.0.323365650.0.140882806-.2.29528121.0.0217170130.0949904639797348 | ENSMUST000           |                      |            |

|                    |                                                                                    |                    |                     |                    |
|--------------------|------------------------------------------------------------------------------------|--------------------|---------------------|--------------------|
| ENSMUST00000040154 | 8450.122320 - 0.31788737/0.138645526 - 2.29280657/0.0218591430.0953814355146571    | ENSMUST00000040154 | ENSMUSG00000041697  | Cox6a1             |
| ENSMUST00000133542 | 15.56050899.1.040492597/0.453803203.2.292827790/0.021857921.0953814355146571       | ENSMUST00000133542 | ENSMUST0000027716   | TrpC3              |
| ENSMUST00000153439 | 461.0461934 - 0.40794547/0.177925981 - 2.29278194 - 0.021860561.0953814355146571   | ENSMUST00000153439 | ENSMUSG00000047022  | Mipol1             |
| ENSMUST00000164688 | 1419.722082 - 0.36829640/0.160636741 - 2.29272830 - 0.021863651.0953886988194094   | ENSMUST00000164688 | ENSMUST0000021906   | Oxnad1             |
| ENSMUST00000117583 | 3037.948029 - 0.32366222/0.141170584 - 2.29270301 - 0.021865108.0953888354896578   | ENSMUST00000117583 | ENSMUSG0000029993   | Nfu1               |
| ENSMUST00000150474 | 394.0866985 - 0.50444453/0.220033841 - 2.29257706 - 0.021872366.095414276390637    | ENSMUST00000150474 | ENSMUST0000038021   | Iffo1              |
| ENSMUST00000116503 | 65.17000435 - 0.96140078/0.419406647 - 2.29228789/0.021889035.0954807695439298     | ENSMUST00000116503 | NA                  | NA                 |
| ENSMUST00000139022 | 798.1065443 - 0.37304583/0.162741317 - 2.29226258/0.021890495.095480914966968      | ENSMUST00000139022 | ENSMUSG0000032563   | MrpI3              |
| ENSMUST00000084368 | 52.37868968/0.852720884/0.372009575.2.292201442/0.021894021.0954900702886211       | ENSMUST00000084368 | ENSMUSG00000010021  | Kif19a             |
| ENSMUST00000107447 | 6021.098831/0.344854590/0.150450115.2.2921523830/0.021896851.0954961881331281      | ENSMUST00000107447 | NA                  | NA                 |
| ENSMUST00000112993 | 415.5693508.011082564/0.2666014262.2921203830/0.021898697/0.0954980147751816       | ENSMUST00000112993 | ENSMUSG00000000266  | Mid2               |
| ENSMUST00000140058 | 1403.993032/0.335431388/0.1463453892.2920529970/0.021902585/0.095515261863681      | ENSMUST00000140058 | ENSMUST00000140058  | Pgap2              |
| ENSMUST00000069453 | 204.9587633 - 0.49624278/0.216506151 - 2.29204935/0.021902795/0.0955015261863681   | ENSMUST00000069453 | ENSMUSG00000055725  | Papq3              |
| ENSMUST00000118860 | 313.3333902/0.934446945/0.407693634.2.2920322180/0.021903784/0.0955015261863681    | ENSMUST00000118860 | ENSMUST00000118860  | Efna1              |
| ENSMUST0000032060  | 3038.503859 - 0.32377377/0.141267599 - 2.29191814/0.021910366/0.095524003370618    | ENSMUST0000032060  | ENSMUSG0000029993   | Nfu1               |
| ENSMUST00000136038 | 128.3758232 - 0.68253779/0.297811267 - 2.29184679/0.021914485/0.095537356047085    | ENSMUST00000136038 | ENSMUST00000136038  | 8430429KORik       |
| ENSMUST00000174272 | 82.82549896/0.736034612/0.321160169.2.291799176/0.021917234/0.0955414943028456     | ENSMUST00000174272 | ENSMUSG0000020661   | Dnmt3a             |
| ENSMUST00000001724 | 8609.279231 - 0.47111045/0.205566455 - 2.29176718/0.021919081/0.0955432125876      | ENSMUST00000001724 | ENSMUST00000001724  | Ddx18              |
| ENSMUST00000134739 | 842.3366161/0.578778578/0.2525649932.2916025340/0.021928589/0.0955785400434949     | ENSMUST00000134739 | ENSMUST00000134739  | Pde1a              |
| ENSMUST00000347556 | 118655.3208/0.350219264/0.1528303762.2915553370/0.021931315/0.0955841962424732     | ENSMUST00000347556 | ENSMUSG0000032231   | Anxa2              |
| ENSMUST0000081333  | 299.3857562 - 0.65822067/0.287252554 - 2.29143540/0.0219382430/0.0955957157737641  | ENSMUST0000081333  | ENSMUST000000081333 | Fxn                |
| ENSMUST00000135067 | 4045.569464 - 0.32434809/0.141546847 - 2.29145402/0.021937167/0.0955957157737641   | ENSMUST00000135067 | ENSMUST00000135067  | Fam214b            |
| ENSMUST00000083517 | 15.15038612.1.029345049/0.4492075892.291468520/0.021936300/0.0955957157737641      | ENSMUST00000083517 | ENSMUST00000083517  | Mir101a            |
| ENSMUST00000136068 | 12449.068390/0.425937407/0.185886550.2.291383678/0.021941232/0.0956025140801789    | ENSMUST00000136068 | ENSMUSG0000027422   | Rbp1               |
| ENSMUST00000176587 | 344.9964807/0.42859507/0.187066426 - 2.29113839/0.0219554100.0956580613172469      | ENSMUST00000176587 | ENSMUST00000176587  | Wdr37              |
| ENSMUST00000169060 | 14.09085020 - 1.03516760/0.451843730 - 2.29100602/0.021963065/0.0956789540293658   | ENSMUST00000169060 | NA                  | NA                 |
| ENSMUST00000134828 | 498.3440842/0.43301912/0.18906815 - 2.29102388/0.0219620320/0.0956789540293658     | ENSMUST00000134828 | ENSMUST00000134828  | Ints2              |
| ENSMUST00000149878 | 2318.741794 - 0.46646624/0.203617482 - 2.29089484/0.0219649696/0.095700738275083   | ENSMUST00000149878 | ENSMUSG0000028676   | Srsf10             |
| ENSMUST00000124686 | 17098.79768/0.777318324/0.3393648572.290509186/0.021991816/0.0957906168692944      | ENSMUST00000124686 | ENSMUST00000124686  | Col1a2             |
| ENSMUST00000139960 | 1664.470062/0.315253991/0.137636114.2.29048888/0.021992991/0.0957906168692944      | ENSMUST00000139960 | ENSMUSG0000046897   | Zfp740             |
| ENSMUST00000169393 | 1287.670037/0.407544945/0.177932811.2.290442906/0.0219956540/0.095795972670103     | ENSMUST00000169393 | ENSMUST00000169393  | BC017643           |
| ENSMUST00000125001 | 1581.101313 - 0.45679189/0.199448509 - 2.29027480/0.022005391/0.095832146508464    | ENSMUST00000125001 | ENSMUST00000063235  | Ptpmt1             |
| ENSMUST00000137766 | 8447.663464 - 0.31778299/0.138759852 - 2.29016528/0.0220117360/0.0958401698709683  | ENSMUST00000137766 | ENSMUST00000137766  | Cox6a1             |
| ENSMUST00000136770 | 2204.776066 - 0.43910179/0.191731406 - 2.29019234/0.0220101680/0.0958401698709683  | ENSMUST00000136770 | ENSMUST00000136770  | Imp4               |
| ENSMUST00000127699 | 50842.80735 - 0.43422385/0.189602972 - 2.29017432/0.0220112130/0.0958401698709683  | ENSMUST00000127699 | ENSMUST00000127699  | Hspa8              |
| ENSMUST00000133094 | 28.67776851 - 0.97993646/0.4427906800 - 2.29006986/0.0220172670/0.0958589126565463 | ENSMUST00000133094 | ENSMUST00000133094  | Hps3               |
| ENSMUST00000100023 | 1191.498049/0.417394999/0.1822717772.2899595630/0.0220236600/0.095881009818356     | ENSMUST00000100023 | ENSMUST00000100023  | Mb21d2             |
| ENSMUST00000145256 | 123.4315796 - 0.69243169/0.302386017 - 2.28989321/0.0220275070/0.095889653102894   | ENSMUST00000145256 | ENSMUST00000145256  | Zfp961             |
| ENSMUST00000084881 | 10074.566120/0.533916684/0.233164232.2.289873868/0.0220286290/0.095889653102894    | ENSMUST00000084881 | ENSMUST00000084881  | Crtap              |
| ENSMUST00000066414 | 2358.6975430/0.315572623/0.137815552.2.2898186510/0.0220318310/0.0958973656154413  | ENSMUST00000066414 | ENSMUST00000066414  | NA                 |
| ENSMUST00000172376 | 91.31361384 - 0.76715763/0.335038574 - 2.28975913/0.0220352830/0.095903085939035   | ENSMUST00000172376 | ENSMUST00000172376  | NA                 |
| ENSMUST00000116439 | 536.43667231.038930845/0.453729625.2.289757574/0.0220353730/0.095903085939035      | ENSMUST00000116439 | NA                  | NA                 |
| ENSMUST00000147564 | 1223.6236150.330552983/0.1443689192.289640905/0.0220421410/0.095902757556216       | ENSMUST00000147564 | ENSMUSG0000029621   | Arcp1a             |
| ENSMUST00000125704 | 138.7413234 - 0.72070682/0.31478902 - 2.28963793/0.0220423130/0.095902757556216    | ENSMUST00000125704 | ENSMUST0000020083   | 2010107G23Rik      |
| ENSMUST00000154585 | 4698.793093/0.466824623/0.203879864.2.289704405/0.0220384570/0.095902757556216     | ENSMUST00000154585 | ENSMUST00000154585  | Ccn1               |
| ENSMUST00000085814 | 1798.176337/0.4242102600/0.185275047.2.2896243490/0.0220431020/0.095902757556216   | ENSMUST00000085814 | ENSMUST0000020647   | Nco1               |
| ENSMUST00000048578 | 4837.992289 - 0.36279585/0.158450641 - 2.28964584/0.0220418550/0.095902757556216   | ENSMUST00000048578 | ENSMUST00000048578  | Ttc1               |
| ENSMUST00000148593 | 8384.924017/0.9824830180/0.429112969.2.289567290/0.0220464120/0.095910928726184    | ENSMUST00000148593 | ENSMUST0000001506   | Col1a1             |
| ENSMUST00000169807 | 2697.272598/0.3199332100/0.139739171.2.289502707/0.0220501600/0.0959209944225736   | ENSMUST00000169807 | ENSMUST00000169807  | Pcgf2              |
| ENSMUST00000150158 | 649.1003088 - 0.569786790/0.248879417 - 2.28940904/0.0220555960/0.0959384058973833 | ENSMUST00000150158 | ENSMUST00000055491  | Pprc1              |
| ENSMUST00000163265 | 485.5924066 - 0.78279989/0.341957192 - 2.28917511/0.02206691/0.0959124889625134    | ENSMUST00000163265 | ENSMUST00000163265  | Arhgap19           |
| ENSMUST00000114603 | 1816.526666 - 0.434826990/0.189969852 - 2.28892628/0.022083630/0.0960478830394929  | ENSMUST00000114603 | ENSMUST00000209145  | Eif2b4             |
| ENSMUST00000102776 | 5417.418446/0.391154421/0.170892265.2.2888948240/0.0220845640/0.096049592605756    | ENSMUST00000102776 | ENSMUST0000020776   | Rnf130             |
| ENSMUST00000130182 | 481.7981803/0.5507445320/0.240630592.2.2887552480/0.0220935760/0.0960786317616886  | ENSMUST00000130182 | ENSMUST0000030986   | Dhx32              |
| ENSMUST00000139128 | 482.2217593/0.436536591/0.1907391062.2886580510/0.0220992280/0.096096187379196     | ENSMUST00000139128 | ENSMUST00000139128  | Zer1               |
| ENSMUST00000156930 | 90.84241917/0.749224592/0.3273796162.288549908/0.0221055170/0.0961180635784279     | ENSMUST00000156930 | ENSMUST00000156930  | NA                 |
| ENSMUST00000164837 | 5779.517466/0.460828181/0.2013777882.2883764130/0.0221156090/0.0961494535675753    | ENSMUST00000164837 | ENSMUST00000164837  | ENSMUSG00000050088 |
| ENSMUST00000155970 | 856.3622476/0.5355033130/0.2340087282.2883903410/0.0221147790/0.0961494535675753   | ENSMUST00000155970 | ENSMUST00000155970  | Pcmt2              |
| ENSMUST00000014695 | 1299.505566 - 0.45498531/0.198834235 - 2.28826445/0.0221221520/0.0961715313031938  | ENSMUST00000014695 | ENSMUST00000014695  | Mrsps25            |
| ENSMUST00000106505 | 705.5286369 - 0.49381422/0.215807502 - 2.28821622/0.0221249320/0.0961744858207655  | ENSMUST00000106505 | ENSMUST00000106505  | Dph5               |
| ENSMUST00000132757 | 56.49885921 - 0.80460508/0.351646965 - 2.28810473/0.0221314220/0.09619450132875    | ENSMUST00000132757 | ENSMUST00000132757  | Rpprip1            |
| ENSMUST00000114628 | 3610.353424 - 0.36449758/0.159310098 - 2.28797538/0.0221389540/0.0962259399048548  | ENSMUST00000114628 | NA                  | NA                 |
| ENSMUST00000331597 | 8033.893189/0.380017709/0.1660958892.2879416830/0.0221409170/0.0962259399048548    | ENSMUST00000331597 | ENSMUST000000031597 | Plibd2             |
| ENSMUST00000129004 | 926.1319595 - 0.49442750/0.216124744 - 2.28769502/0.0221552870/0.0962721245056573  | ENSMUST00000129004 | ENSMUST00000129004  | Lsg1               |
| ENSMUST00000140998 | 304.6275479 - 0.53173526/0.232432839 - 2.28769420/0.0221553350/0.0962721245056573  | ENSMUST00000140998 | ENSMUST00000140998  | Fam214b            |
| ENSMUST00000150349 | 8042.597659/0.428844285/0.187455262.2.2877153750/0.0221541010/0.0962721245056573   | ENSMUST00000150349 | ENSMUST00000150349  | Rpn2               |
| ENSMUST00000154667 | 19218.564220/0.316949744/0.138551694.2.287591982/0.0221612930/0.0962917617215767   | ENSMUST00000154667 | ENSMUST00000154667  | Slic39a1           |
| ENSMUST00000059484 | 1333.031949/0.3875718430/0.169437099.2.287408398/0.0221719960/0.096321606027809    | ENSMUST00000059484 | ENSMUST00000059484  | NA                 |
| ENSMUST00000163629 | 5777.288855/0.4612670880/0.2016541682.2874165770/0.0221715190/0.096321606027809    | ENSMUST00000163629 | ENSMUST00000163629  | NA                 |
| ENSMUST00000201539 | 1342.506905 - 0.59134388/0.258522278 - 2.28740010/0.0221724800/0.096321606027809   | ENSMUST00000201539 | ENSMUST00000201539  | Vrk1               |
| ENSMUST00000162543 | 2147.436719 - 0.32072225/0.140217158 - 2.28732529/0.0221768430/0.096326390304243   | ENSMUST00000162543 | ENSMUST00000162543  | Tmem33             |
| ENSMUST00000111093 | 137.1895505 - 0.93857234/0.410343867 - 2.28728250/0.0221793390/0.096326390304243   | ENSMUST00000111093 | ENSMUST00000111093  | Cldn15             |
| ENSMUST00000001790 | 137.1895505 - 0.93857234/0.410343867 - 2.28728250/0.0221793390/0.096326390304243   | ENSMUST00000001790 | ENSMUST00000001790  | Cldn15             |
| ENSMUST00000107914 | 17832.35570 - 0.448632920/0.196139769 - 2.28731240/0.0221775940/0.096326390304243  | ENSMUST00000107914 | ENSMUST00000107914  | Tpm2               |
| ENSMUST00000115544 | 2506.406299/0.839110940/0.3668679082.2872280560/0.0221824560/0.096333878189123     | ENSMUST00000115544 | ENSMUST00000115544  | Srxp               |
| ENSMUST00000055211 | 13.13147595 - 0.97665255/0.427047362 - 2.28698885/0.0221964770/0.096388295984087   | ENSMUST00000055211 | ENSMUST00000055211  | Lrr-3b             |
| ENSMUST00000120240 | 3039.966186 - 0.32338233/0.141383113 - 2.28689502/0.0222019510/0.0964033534073245  | ENSMUST00000120240 | ENSMUST00000120240  | Nfu1               |
| ENSMUST00000123466 | 479.26149540/0.50324137/0.196916374.2.286800970/0.0222028220/0.0964033534073245    | ENSMUST00000123466 | ENSMUST00000123466  | D11Wsu47e          |
| ENSMUST00000085026 | 1340.176872 - 0.59104708/0.258459379 - 2.28680841/0.0222070070/0.0964152698089574  | ENSMUST00000085026 | ENSMUST00000085026  | Vrk1               |
| ENSMUST00000156160 | 2331.059980 - 0.343403610/0.150171985 - 2.28673549/0.0222112660/0.0964275035098192 | ENSMUST00000156160 | ENSMUST00000156160  | Smrce1             |
| ENSMUST00000114696 | 400.69374780/0.4523603180/0.197823695.2.2866842000/0.0222146260/0.096432538594778  | ENSMUST00000114696 | ENSMUST00000114696  | NA                 |
|                    |                                                                                    |                    |                     |                    |

|                     |                                                                                           |                     |                      |                |
|---------------------|-------------------------------------------------------------------------------------------|---------------------|----------------------|----------------|
| ENSMUST00000148048  | 1635.800028 - 0.46982888 - 0.205817255 - 2.28274777 - 0.0224452290.0971972996885061       | ENSMUST00000148048  | ENSMUSG000000039768  | Dnajc11        |
| ENSMUST00000177385  | 3900.491505.0.3565307990.0.156188936.2.282689210.0.022448681.0.097199669213321            | ENSMUST00000177385  | NA                   | NA             |
| ENSMUST00000162098  | 3900.491505.0.3565307990.0.156188936.2.282689210.0.022448681.0.097199669213321            | ENSMUST00000162098  | ENSMUSG000000027833  | Shox2          |
| ENSMUST00000173893  | 1351.758690 - 0.78908516 - 0.345688131 - 2.28265043 - 0.0224509670.0972032776965706       | ENSMUST00000173893  | NA                   | NA             |
| ENSMUST00000099444  | 973.6026532 - 0.450974394 - 0.1975761772 - 2.82534256 - 0.0224578107.097226643311183      | ENSMUST00000099444  | ENSMUSG000000021461  | Fancnc         |
| ENSMUST00000100672  | 9574.570854 - 0.311029291 - 0.136270653 - 2.824378110 - 0.0224635050.0972449758123618     | ENSMUST00000100672  | ENSMUST000000100672  | Samd4          |
| ENSMUST00000129430  | 80.55205931 - 0.835633994 - 0.3661323662 - 2.823275740 - 0.0224700070.0972546655575497    | ENSMUST00000129430  | ENSMUSG000000035547  | Capn5          |
| ENSMUST00000044789  | 2560.351707 - 0.836817614 - 0.366508020 - 2.823284910 - 0.0224699530.0972546655575497     | ENSMUST00000044789  | ENSMUST000000044789  | Srxp           |
| ENSMUST00000109906  | 3877.478074 - 0.32838910 - 0.143887467 - 2.28232595 - 0.0224701030.0972546655575497       | ENSMUST00000109906  | NA                   | NA             |
| ENSMUST00000127425  | 56.90912320 - 0.799450459 - 0.350286035 - 2.822788930 - 0.0224728730.0972569664975363     | ENSMUST00000127425  | ENSMUSG000000030499  | Kctd15         |
| ENSMUST00000163152  | 2371.854580 - 0.366395824 - 0.1605419772 - 2.8224311220 - 0.0224749900.0972569664975363   | ENSMUST00000163152  | ENSMUSG000000060671  | Atp8b2         |
| ENSMUST00000176018  | 1339.052200 - 0.39329364 - 0.172327677 - 2.82244304 - 0.0224749950.0972569664975363       | ENSMUST00000176018  | ENSMUST000000176018  | Cers6          |
| ENSMUST00000119274  | 5848.411737 - 0.348494222 - 0.152705838 - 2.821217690 - 0.0224818020.0972801336139372     | ENSMUST00000119274  | ENSMUSG000000024006  | Stk38          |
| ENSMUST00000113454  | 12087.55368 - 0.346263495 - 0.151735001 - 2.820278230 - 0.0224876970.0972993502908441     | ENSMUST00000113454  | NA                   | NA             |
| ENSMUST00000117194  | 3582.218672 - 0.36378993 - 0.159417183 - 2.28199952 - 0.0224893680.0973002872960844       | ENSMUST00000117194  | ENSMUSG000000043987  | Cep164         |
| ENSMUST00000151681  | 441.6487480 - 0.494308398 - 0.216622023 - 2.818935520 - 0.0224956250.0973210675452964     | ENSMUST00000151681  | ENSMUST000000048249  | Crebrf         |
| ENSMUST00000114013  | 31.31496247 - 1.01139246 - 0.443258353 - 2.28172229 - 0.0225057410.0973585349931408       | ENSMUST00000114013  | ENSMUSG000000015222  | Map2           |
| ENSMUST000000069372 | 103.9706997 - 0.670659330 - 0.293947905 - 2.28155848 - 0.0225154200.0973878151644327      | ENSMUST000000069372 | ENSMUST000000069372  | E0300300I06rik |
| ENSMUST00000123550  | 16.53987765 - 1.034415870 - 0.4533764182 - 2.815828710 - 0.0225139780.0973878151644327    | ENSMUST00000123550  | ENSMUSG000000028581  | Lapmt5         |
| ENSMUST00000145632  | 2074.954186 - 0.57986197 - 0.254163930 - 2.28144871 - 0.0225219070.097495807226873        | ENSMUST00000145632  | ENSMUST000000145632  | Tank           |
| ENSMUST00000119901  | 16417.154200 - 0.324870987 - 0.1424169262 - 2.811262330 - 0.0225409780.0974857609805471   | ENSMUST00000119901  | ENSMUST000000023067  | Cdkm1a         |
| ENSMUST00000135719  | 4527.589194 - 0.468038068 - 0.205184809 - 2.810561310 - 0.0225451250.0974973949631782     | ENSMUST00000135719  | ENSMUSG000000027829  | Ccn1l          |
| ENSMUST00000156035  | 453.4918334 - 0.48092340 - 0.210838742 - 2.28100109 - 0.0225483820.097505177988523        | ENSMUST00000156035  | ENSMUST000000032469  | Dbr1           |
| ENSMUST00000149410  | 4570.6871130 - 0.400505642 - 0.1492886782 - 2.80853756 - 0.0225571020.0975263793369109    | ENSMUST00000149410  | ENSMUSG000000049550  | Ctip1          |
| ENSMUST00000061516  | 18.06436159 - 0.03571301 - 0.4531544982 - 2.808364580 - 0.0225581260.0975263793369109     | ENSMUST00000061516  | ENSMUSG000000045551  | Fpr1           |
| ENSMUST00000173425  | 356.5029244 - 0.48237984 - 0.211489891 - 2.28086477 - 0.0225646490.0975263793369109       | ENSMUST00000173425  | ENSMUSG000000073422  | H2-K66         |
| ENSMUST00000051934  | 3879.825498 - 0.32803359 - 0.143822672 - 2.28081976 - 0.0225591140.0975263793369109       | ENSMUST00000051934  | ENSMUSG000000044715  | Gskip          |
| ENSMUST00000063869  | 1238.356416 - 0.54496385 - 0.238947617 - 2.28068336 - 0.0225671900.0975423879681927       | ENSMUST00000063869  | ENSMUSG000000028076  | Ctd1d1         |
| ENSMUST00000139840  | 983.802575 - 0.43640472 - 0.191346735 - 2.28070116 - 0.0225661360.0975423879681927        | ENSMUST00000139840  | ENSMUSG000000028744  | Pqlc2          |
| ENSMUST00000105594  | 3558.112985 - 0.55194588 - 0.242006743 - 2.28070456 - 0.0225659340.0975423879681927       | ENSMUST00000105594  | NA                   | NA             |
| ENSMUST00000005830  | 4160.648261 - 0.33229053 - 0.145700741 - 2.28063722 - 0.0225699220.09754878978131438      | ENSMUST00000005830  | ENSMUSG000000005687  | Bcas2          |
| ENSMUST00000177448  | 323.62132330 - 0.491157370 - 0.215370115 - 2.2805270310 - 0.0225764490.0975698040298987   | ENSMUST00000177448  | ENSMUSG0000000040407 | Akap9          |
| ENSMUST00000144749  | 1469.959392 - 0.556718405 - 0.244131043 - 2.2804080870 - 0.0225834960.0975939562414793    | ENSMUST00000144749  | ENSMUST000000014749  | Agrn           |
| ENSMUST00000150090  | 5635.311881 - 0.436803306 - 0.191551633 - 2.280342370 - 0.0225873900.0976044820541501     | ENSMUST00000150090  | ENSMUSG000000058388  | Phf1f          |
| ENSMUST00000145969  | 1324.400671 - 0.38985859 - 0.170987477 - 2.28020144 - 0.0225957430.0976347211129396       | ENSMUST00000145969  | ENSMUST000000145969  | Glxr2          |
| ENSMUST00000121591  | 431.3964579 - 0.57102465 - 0.250431550 - 2.28016258 - 0.0225980470.0976379228854832       | ENSMUST00000121591  | ENSMUSG000000020389  | Cdk13          |
| ENSMUST00000114359  | 1097.802585 - 0.477250273 - 0.2093102002 - 2.801099580 - 0.0226011670.0976450992618431    | ENSMUST00000114359  | ENSMUST00000014359   | Tnlp2          |
| ENSMUST00000039909  | 641.1093191 - 0.035281882 - 0.4540057282 - 2.800766920 - 0.0226031400.0976471372093863    | ENSMUST00000039909  | ENSMUSG000000039909  | Fxyd1          |
| ENSMUST00000108555  | 254.3543996 - 0.5414373780 - 0.2374834782 - 2.798949280 - 0.0226139200.0976560634261591   | ENSMUST00000108555  | NA                   | NA             |
| ENSMUST00000026150  | 486.8149790 - 0.77989451 - 0.342071169 - 2.27991888 - 0.0226124990.0976560634261591       | ENSMUST00000026150  | ENSMUSG000000025154  | Arhgap19       |
| ENSMUST00000153334  | 5405.8476130 - 0.4091827580 - 0.1794684562 - 2.799703460 - 0.0226094470.0976560634261591  | ENSMUST00000153334  | ENSMUST000000153334  | Shc1           |
| ENSMUST00000066371  | 5585.499560 - 0.4362147400 - 0.1913298122 - 2.799099350 - 0.0226130300.0976560634261591   | ENSMUST00000066371  | ENSMUSG000000058388  | Phf1f          |
| ENSMUST00000030348  | 4219.066259 - 0.36078398 - 0.158237672 - 2.28001323 - 0.0226069030.0976560634261591       | ENSMUST00000030348  | ENSMUST000000030348  | Magoh          |
| ENSMUST00000152072  | 1786.403923 - 0.434369710 - 0.190520134 - 2.27991501 - 0.0226127290.0976560634261591      | ENSMUST00000152072  | ENSMUSG000000025072  | Pdgr1          |
| ENSMUST00000126149  | 1524.0975390 - 0.639177084 - 0.2803678292 - 2.797804080 - 0.0226207150.0976791018294413   | ENSMUST00000126149  | ENSMUSG0000000126149 | Lsp1           |
| ENSMUST00000034771  | 2542.7384700 - 0.4310969380 - 0.1890998122 - 2.797322350 - 0.0226235740.0976851420350267  | ENSMUST00000034771  | NA                   | NA             |
| ENSMUST00000102584  | 314.1678807 - 0.74285173 - 0.325855553 - 2.27969639 - 0.0226257010.097685721662139        | ENSMUST00000102584  | ENSMUSG0000000102584 | Ung            |
| ENSMUST00000090685  | 5422.561848 - 0.4404547720 - 0.1932089682 - 2.796807820 - 0.0226266270.097685721662139    | ENSMUST00000090685  | ENSMUSG000000058388  | Phf1           |
| ENSMUST00000048197  | 1919.765852 - 0.3232563010 - 0.141801324 - 2.27964237 - 0.0226289070.0976892606297498     | ENSMUST00000048197  | ENSMUST000000048197  | Rhod           |
| ENSMUST00000131592  | 845.35091360 - 0.5072174860 - 0.2255046232 - 2.795817890 - 0.0226325040.0976984843957079  | ENSMUST00000131592  | ENSMUSG000000030123  | Piknd1         |
| ENSMUST00000150127  | 279.7509980 - 0.648474943 - 0.284480781 - 2.795035250 - 0.0226371500.0977102857864411     | ENSMUST00000150127  | ENSMUST000000150127  | Srrm4          |
| ENSMUST00000125447  | 2401.3203140 - 0.3883793440 - 0.1703801862 - 2.7944865560 - 0.0226381580.0977102857864411 | ENSMUST00000125447  | ENSMUSG000000028649  | Macf1          |
| ENSMUST00000156832  | 13.97051576 - 1.030598953 - 0.452145404 - 2.793529350 - 0.0226460930.0977362344451157     | ENSMUST00000156832  | ENSMUST000000156832  | Etnk2          |
| ENSMUST0000079772   | 1133.724994 - 0.8496996180 - 0.372783813 - 2.7993361400 - 0.0226470910.0977362344451157   | ENSMUST0000079772   | ENSMUSG000000063727  | Tnfrsf11b      |
| ENSMUST00000113223  | 18.61341920 - 0.97525585 - 0.427882964 - 2.27925843 - 0.0226517070.0977498514860949       | ENSMUST00000113223  | ENSMUST000000113223  | Taf7f          |
| ENSMUST00000153267  | 57.64683196 - 0.96411922 - 0.423012667 - 2.27917340 - 0.0226567590.0977639838414681       | ENSMUST00000153267  | ENSMUSG000000039396  | Neil3          |
| ENSMUST00000150563  | 76.07198760 - 0.68634018 - 0.301138115 - 2.27915414 - 0.0226579040.0977639838414681       | ENSMUST00000150563  | ENSMUST000000150563  | Cyb561         |
| ENSMUST00000042587  | 14.02388911 - 0.021032206 - 0.4479999122 - 2.799091920 - 0.0226617040.097740771164691     | ENSMUST00000042587  | ENSMUST00000042587   | Pitx2          |
| ENSMUST00000167402  | 6904.594179 - 0.48262922 - 0.211767974 - 2.27940725 - 0.0226642560.097778378790656        | ENSMUST00000167402  | NA                   | NA             |
| ENSMUST00000136746  | 361.79769680 - 0.4170520390 - 0.1830038082 - 2.789254630 - 0.0226714960.0978037132488405  | ENSMUST00000136746  | ENSMUSG000000037270  | 4932438A13rik  |
| ENSMUST00000112990  | 417.23133310 - 0.6089307410 - 0.2672073732 - 2.788695330 - 0.0226748210.0978054490928962  | ENSMUST00000112990  | ENSMUST000000112990  | Mid2           |
| ENSMUST0000078090   | 1531.0559210 - 0.5135469430 - 0.2253501162 - 2.788847510 - 0.0226739170.0978054490928962  | ENSMUST0000078090   | ENSMUST00000078090   | MLH3           |
| ENSMUST00000117405  | 6904.553224 - 0.482666610 - 0.211807102 - 2.78802790 - 0.0226789070.0978077116288004      | ENSMUST00000117405  | ENSMUST000000117405  | Gm15459        |
| ENSMUST00000166769  | 1812.124123 - 0.42960495 - 0.188525558 - 2.27876240 - 0.0226811920.0978077116288004       | ENSMUST00000166769  | ENSMUST000000166769  | Efr2b4         |
| ENSMUST00000132709  | 510.9247686 - 0.51020041 - 0.22388824 - 2.27881146 - 0.0226782150.0978077116288004        | ENSMUST00000132709  | ENSMUST000000132709  | Rfc3           |
| ENSMUST00000164431  | 5519.361561 - 0.31223090 - 0.137017626 - 2.27876453 - 0.0226810660.0978077116288004       | ENSMUST00000164431  | ENSMUST000000164431  | Sym2bp         |
| ENSMUST00000001672  | 12732.58646 - 0.42727776 - 0.187514352 - 2.27864032 - 0.0226884540.097832728659841        | ENSMUST00000001672  | ENSMUST00000001672   | lfrd1          |
| ENSMUST00000146930  | 648.44211990 - 0.701413455 - 0.308289702 - 2.78581692 - 0.0226919430.0978400602727553     | ENSMUST00000146930  | ENSMUST000000146930  | Chd3           |
| ENSMUST00000142720  | 555.8552611 - 0.410414600 - 0.180119963 - 2.27856257 - 0.0226930800.0978400602727553      | ENSMUST00000142720  | ENSMUST0000000142720 | Sh3glb2        |
| ENSMUST00000006760  | 1804.343932 - 0.81805743 - 0.359043682 - 2.27843428 - 0.0227007150.0978666714429156       | ENSMUST00000006760  | ENSMUST00000006760   | Cdt1           |
| ENSMUST00000134354  | 877.5855698 - 0.369470870 - 0.162178743 - 2.27817080 - 0.0227160420.0979279931367047      | ENSMUST00000134354  | ENSMUST000000134354  | Gna11          |
| ENSMUST00000160785  | 241.54811220 - 0.6193966480 - 0.2719037882 - 2.779993350 - 0.0227266170.0979657157200715  | ENSMUST00000160785  | ENSMUST000000160785  | Unkl           |
| ENSMUST00000060072  | 93.40453444 - 0.855601763 - 0.3756026962 - 2.779436160 - 0.0227299370.09797371171343141   | ENSMUST00000060072  | ENSMUST000000060072  | Dlgap1         |
| ENSMUST00000043204  | 1552.322547 - 0.356058170 - 0.156310216 - 2.277894460 - 0.0227328660.0979980035871537     | ENSMUST00000043204  | ENSMUSG000000035329  | Fbox33         |
| ENSMUST00000162047  | 562.94066700 - 0.4587346460 - 0.2013881842 - 2.778627660 - 0.0227347550.0979818608277582  | ENSMUST00000162047  | ENSMUST000000162047  | Stxbp2         |
| ENSMUST00000162739  | 5967.8537030 - 0.886383180 - 0.1706203342 - 2.777960150 - 0.0227387330.097996596568638    | ENSMUST00000162739  | ENSMUST000000162739  | Impdh1         |
| ENSMUST00000112453  | 23050.45240 - 0.43806189 - 0.192327645 - 2.277685520 - 0.0227453210.0980107164347667      | ENSMUST00000112453  | ENSMUST000000112453  | Sh3kbp1        |
| ENSMUST00000143611  | 35.12366261 - 0.97655426 - 0.428754782 - 2.277652170 - 0.0227473090.0980107164347667      | ENSMUST00000143611  | ENSMUSG000000034611  | Palmd          |
| ENSMUST00000147009  | 834.8412543 - 0.368075210 - 0.161601329 - 2.277674430 - 0.0227459810.0980107164347667     | ENSMUST00000147009  | ENSMUST000000147009  | Sfnx3          |
| ENSMUST00000066211  | 5989.3057070 - 0.355530540 - 0.156103422 - 2.277519970 - 0.0227544760.0980352840641117    | ENSMUST00000066211  | ENSMUST00            |                |

|                    |                                                                            |                    |                     |           |
|--------------------|----------------------------------------------------------------------------|--------------------|---------------------|-----------|
| ENSMUST00000107045 | 93.162677610.7037221560.3094077042.2744170410.0229409230.0985910177339846  | ENSMUST00000107045 | ENSMUSG000000030701 | Plekhhb1  |
| ENSMUST00000147414 | 802.0268768-0.460423560.202442237-2.274345380.0229452280.098603185254882   | ENSMUST00000147414 | ENSMUST00000147414  | Asb6      |
| ENSMUST00000161974 | 2902.840079-0.319416440.140453915-2.274172550.0229556130.0986414794009519  | ENSMUST00000161974 | ENSMUSG00000038722  | Bud31     |
| ENSMUST00000176025 | 38.028771861.0262225460.4512724892.2740640510.0229621350.0986631609976229  | ENSMUST00000176025 | ENSMUST00000176025  | Rab26     |
| ENSMUST00000170153 | 1340.8403440.5076822150.2232538292.2740134710.0229651760.0986698994133439  | ENSMUST00000170153 | ENSMUSG00000046761  | Fam83h    |
| ENSMUST00000095482 | 113.46612930.6715620910.2953321052.2739217250.0229706930.0986809301645974  | ENSMUST00000095482 | NA                  | NA        |
| ENSMUST00000308060 | 5091.171927-0.361945700.159171175-2.273940010.0229695930.0986809301645974  | ENSMUST00000308060 | ENSMUSG00000063070  | Kif1fb    |
| ENSMUST00000124272 | 1092.3354590.4002439880.1760192922.2738643130.0229741450.098689301645974   | ENSMUST00000124272 | ENSMUST00000124272  | Htt       |
| ENSMUST00000071215 | 2565.169836-0.336025280.147788830-2.273685260.0229849170.0987203275895634  | ENSMUST00000071215 | ENSMUSG00000063877  | Chchd1    |
| ENSMUST00000106115 | 4486.4167990.3482886680.1531833942.2736711660.0229857650.0987203275895634  | ENSMUST00000106115 | ENSMUST00000106115  | BC017643  |
| ENSMUST00000137961 | 507.4304214-0.495522310.2717938547-2.273679070.0229852890.0987203275895634 | ENSMUST00000137961 | ENSMUSG00000027176  | Cstf3     |
| ENSMUST00000151971 | 1594.7787330.3233767310.1873713032.2732022590.0230139940.0987961560142543  | ENSMUST00000151971 | ENSMUST00000151971  | S100pbp   |
| ENSMUST00000159173 | 1533.788046-0.476678570.209671134-2.273458270.0229985780.0987626800866041  | ENSMUST00000159173 | ENSMUSG00000041879  | Ipo9      |
| ENSMUST00000099858 | 11842.263238-0.341790660.150342800-2.273408920.0230015480.0987691000253074 | ENSMUST00000099858 | ENSMUST00000099858  | Prep      |
| ENSMUST0000015891  | 1868.583312-0.347582660.152894072-2.273356070.0230047300.0987764245989287  | ENSMUST0000015891  | ENSMUSG00000015747  | Vps45     |
| ENSMUST00000124482 | 4688.145695-0.382014920.168049920-2.273222860.0230127530.098761560142543   | ENSMUST00000124482 | ENSMUST00000124482  | Mrpl17    |
| ENSMUST00000124878 | 1096.949511-0.340161650.149641207-2.273181710.0230152310.0987961560142543  | ENSMUST00000124878 | ENSMUSG00000009073  | Nf2       |
| ENSMUST0000020831  | 8803.1970000.4259328710.1873713032.2732022590.0230139940.0987961560142543  | ENSMUST0000020831  | ENSMUST0000020831   | Fam114a2  |
| ENSMUST00000135946 | 865.1884175-0.449827750.197882909-2.273201670.0230140290.0987961560142543  | ENSMUST00000135946 | ENSMUST00000135946  | Tmem199   |
| ENSMUST00000162422 | 1043.8159010.3678532710.1618390270.2729577500.0230287260.0988477164685508  | ENSMUST00000162422 | ENSMUST00000162422  | Hcfc2     |
| ENSMUST00000166604 | 502.1663653-0.4814121500.211817315-2.272770500.0230400100.098898351774976  | ENSMUST00000166604 | NA                  | NA        |
| ENSMUST00000039204 | 2262.5805780.3628328910.1596596812.2725392380.0230539600.0989370199129128  | ENSMUST00000039204 | ENSMUSG00000040964  | Arhgef10l |
| ENSMUST00000164152 | 2262.5805780.3628328910.1596596812.2725392380.0230539600.0989370199129128  | ENSMUST00000164152 | NA                  | NA        |
| ENSMUST00000025563 | 230381.2990-0.4853545200.213574804-2.272505810.0230559770.0989393277364071 | ENSMUST00000025563 | ENSMUSG00000024661  | Fh1       |
| ENSMUST00000172805 | 273.78100560.6378016710.2806819912.2732384390.0230666800.0989370981138625  | ENSMUST00000172805 | ENSMUST00000172805  | Map3k8    |
| ENSMUST00000131500 | 3914.5961860.2889891600.1271804072.2722773690.0230697620.0989370981138625  | ENSMUST00000131500 | ENSMUSG00000029998  | Pcyox1    |
| ENSMUST00000153987 | 218.90919040.4913648760.2162431772.2722792070.0230696510.0989370981138625  | ENSMUST00000153987 | ENSMUST00000153987  | Polm      |
| ENSMUST00000153203 | 3577.277902-0.466480990.205291285-2.272288350.0230690990.0989370981138625  | ENSMUST00000153203 | ENSMUSG00000020474  | Stoml2    |
| ENSMUST00000111709 | 2063.482888-0.307883440.1354993390.272213630.0230736100.0989832588272619   | ENSMUST00000111709 | NA                  | NA        |
| ENSMUST00000174639 | 2386.1456560.4549328340.2002234282.2721258770.0230789080.098996412359057   | ENSMUST00000174639 | ENSMUSG00000071454  | Dtnb      |
| ENSMUST00000033241 | 851.2160887-0.346418420.152471004-2.272028230.0230848050.0990122418298508  | ENSMUST00000033241 | ENSMUSG00000030946  | Lhpp      |
| ENSMUST00000169325 | 8803.8551780.4257971540.1874074402.2720397490.0230841090.0990122418298508  | ENSMUST00000169325 | NA                  | NA        |
| ENSMUST00000110817 | 135.8884390-0.912012480.4001418625-2.271973500.0230881100.0990200729652097 | ENSMUST00000110817 | ENSMUSG00000027315  | Spint1    |
| ENSMUST00000138420 | 1224.647225-0.452481900.199182089-2.271699760.0231046500.0990703539668248  | ENSMUST00000138420 | ENSMUSG00000056952  | Tatdn2    |
| ENSMUST00000044369 | 14217.02551-0.399728410.175961472-2.271681460.0231057560.0990703539668248  | ENSMUST00000044369 | ENSMUST00000044369  | Atp6v1h   |
| ENSMUST00000151853 | 347.58818830.6420956910.2826466652.2717256860.0231030830.0990703539668248  | ENSMUST00000151853 | ENSMUSG00000070323  | Mmp27     |
| ENSMUST00000148957 | 49.32505884-0.951098670.418674642-2.271689230.0231052860.0990703539668248  | ENSMUST00000148957 | ENSMUST00000148957  | Whrn      |
| ENSMUST00000109079 | 424.7905921-0.574685500.252989239-2.271580820.0231118400.0990837411961557  | ENSMUST00000109079 | ENSMUSG00000020389  | Cdk13     |
| ENSMUST00000109074 | 424.7905921-0.574685500.252989239-2.271580820.0231118400.0990837411961557  | ENSMUST00000109074 | NA                  | NA        |
| ENSMUST00000177044 | 62.957134990.7464431790.3286151742.2714811650.0231178650.09909246004101399 | ENSMUST00000177044 | ENSMUSG00000005341  | Cbx7      |
| ENSMUST00000105799 | 2263.2601720.3627667690.1597054662.2714737160.0231183160.09909246004101399 | ENSMUST00000105799 | ENSMUSG00000040964  | Arhgef10l |
| ENSMUST00000105800 | 2263.2601720.3627667690.1597054662.2714737160.0231183160.09909246004101399 | ENSMUST00000105800 | NA                  | NA        |
| ENSMUST00000150085 | 742.6227909-0.424907470.1870692662-2.271391160.0231233080.099107505580412  | ENSMUST00000150085 | ENSMUSG00000001909  | Trmt1     |
| ENSMUST00000170628 | 337.50543960.9169437300.4037019242.2713385150.0231264930.099108465096356   | ENSMUST00000170628 | ENSMUSG00000041981  | Serpin3a3 |
| ENSMUST00000140853 | 2058.820715-0.432944880.190610214-2.271362440.0231250460.099108465096356   | ENSMUST00000140853 | ENSMUST00000274772  | Pdgr1     |
| ENSMUST00000172782 | 23741.948150.3429963500.1510160792.2712571470.0231314150.0991183767125415  | ENSMUST00000172782 | ENSMUSG00000061232  | H2-K1     |
| ENSMUST00000171901 | 613.04497790.4335806250.1908994490.2712513150.0231317680.0991183767125415  | ENSMUST00000171901 | ENSMUST00000171901  | Gtpbb2    |
| ENSMUST00000303742 | 1558.293334-0.361920950.159352099-2.271202940.0231346950.0991245712476027  | ENSMUST00000303742 | ENSMUSG00000028910  | Mecr      |
| ENSMUST0000024757  | 3225.5949590.5274090610.2322188520.2711274560.0231365400.09912612773641013 | ENSMUST0000024757  | ENSMUST0000024757   | Enpp4     |
| ENSMUST00000112104 | 3512.9399540.4727938360.2081757972.2711277800.0231392430.0991331644343756  | ENSMUST00000112104 | ENSMUSG00000035299  | Mid1      |
| ENSMUST00000720400 | 1332.298519-0.585215420.257689276-2.271011920.0231462550.0991550577930074  | ENSMUST00000720400 | ENSMUST0000072040   | Vrk1      |
| ENSMUST00000201918 | 2039.5096720.6467788450.2848167732.2708593950.0231554190.0991802507386752  | ENSMUST00000201918 | ENSMUST00000201918  | Ror2      |
| ENSMUST00000043424 | 1228.1865080.5296887870.2332524452.2708820350.02315520.0991802507386752    | ENSMUST00000043424 | NA                  | NA        |
| ENSMUST00000001547 | 237719.06590.9775608720.4304840002.2708413580.0231565830.0991802507386752  | ENSMUST00000001547 | ENSMUSG00000001506  | Col1a1    |
| ENSMUST00000151569 | 589.8009199-0.607455500.267514630-2.270737500.0231628730.0992008419322214  | ENSMUST00000151569 | ENSMUST00000151569  | Cep250    |
| ENSMUST00000122954 | 279.5162590.6525094240.2873694152.2706293340.0231694260.0992215516678999   | ENSMUST00000122954 | NA                  | NA        |
| ENSMUST00000113578 | 3226.5606020.5274535950.2322961182.2706087320.0231706740.0992215516678999  | ENSMUST00000113578 | ENSMUST00000113578  | NA        |
| ENSMUST00000129588 | 2887.1938000.3637818710.1602215202.2704931960.0231776750.0992388316138512  | ENSMUST00000129588 | ENSMUST00000129588  | Mgat1     |
| ENSMUST00000127946 | 1912.7635040.4136216390.1821719462.2705012900.0231771850.0992388316138512  | ENSMUST00000127946 | ENSMUST00000127946  | Dock7     |
| ENSMUST00000148500 | 1472.450056-0.446836350.196806769-2.270431840.0231813930.099248041643639   | ENSMUST00000148500 | ENSMUST00000274225  | Csrp2bp   |
| ENSMUST00000111954 | 5919.6149840.3550676730.1564103782.2701030200.0232013330.0993274141407038  | ENSMUST00000111954 | ENSMUST00000111954  | Sfxn3     |
| ENSMUST00000590903 | 1148.125380-0.414471400.182595571-2.269887490.0232144100.099337561192784   | ENSMUST00000590903 | ENSMUST00000590903  | Coa6      |
| ENSMUST00000118768 | 3922.1363500.2857021330.1258686272.2698438890.0232170560.099337561192784   | ENSMUST00000118768 | ENSMUST00000118768  | Prkd3     |
| ENSMUST00000109081 | 426.6948948-0.570371730.251284260-2.269826730.0232180970.099337561192784   | ENSMUST00000109081 | ENSMUST00000109081  | Cdk13     |
| ENSMUST00000150793 | 12.3959706-0.988460860.435470444-2.269869000.0232155320.099337561192784    | ENSMUST00000150793 | ENSMUST00000150793  | Galnt3    |
| ENSMUST00000166985 | 55.40233828-1.005507600.443001038-2.269763520.0232219340.0993838202896791  | ENSMUST00000166985 | NA                  | NA        |
| ENSMUST00000040131 | 7772.6549000.4276636660.1884204852.2697301970.0232239580.099384208196625   | ENSMUST00000040131 | ENSMUST00000040131  | Elf1      |
| ENSMUST00000113479 | 2332.3240860.3753306300.1653647892.2697131090.0232249950.099384208196625   | ENSMUST00000113479 | NA                  | NA        |
| ENSMUST00000337480 | 1907.2508760.3493419820.1539191222.2696464070.0232290450.0993951829080121  | ENSMUST00000337480 | ENSMUST00000337480  | Wipf2     |
| ENSMUST00000156429 | 2889.370783-0.400102840.176288881-2.269586390.0232326900.099399949129371   | ENSMUST00000156429 | ENSMUST00000156429  | Nudt3     |
| ENSMUST00000040402 | 5464.373675-0.391263930.172394927-2.269579140.0232333100.099399949129371   | ENSMUST00000040402 | ENSMUST00000040402  | Ppp1r11   |
| ENSMUST00000176896 | 17366.992620.4004734860.1764575782.2695170730.0232369000.099409722701567   | ENSMUST00000176896 | ENSMUST00000176896  | Npfn      |
| ENSMUST00000149200 | 816.7792758-0.560545100.247001800-2.269396830.0232442040.0994346150462867  | ENSMUST00000149200 | ENSMUST00000149200  | Tarbp2    |
| ENSMUST00000132527 | 126.2205724-0.695141330.306326425-2.269282940.0232511240.099457860888324   | ENSMUST00000132527 | ENSMUST00000132527  | Col9a3    |
| ENSMUST00000135292 | 163.841812-0.446550720.196783931-2.269243820.0232535020.0994616738570822   | ENSMUST00000135292 | ENSMUST00000135292  | Ndufa12   |
| ENSMUST00000170212 | 33.3488542-0.904467700.398585476-2.269193810.0232565410.0994683160522427   | ENSMUST00000170212 | ENSMUST00000170212  | Mecom     |
| ENSMUST00000060807 | 1339.4380540.5054593550.2227912532.2687576270.0232830690.0995745081725755  | ENSMUST00000060807 | ENSMUST00000060807  | Fam83h    |
| ENSMUST00000123846 | 1985.3647710.705210010.310843550-2.268697590.0232867210.099584655175916    | ENSMUST00000123846 | ENSMUST00000123846  | Lig1      |
| ENSMUST00000139866 | 5804.659400-0.396648900.174840553-2.268632140.0232907040.0995953343765934  | ENSMUST00000139866 | ENSMUST00000139866  | Cers2     |
| ENSMUST0000028295  | 3135.537218-0.348128840.153459409-2.268540240.0232962980.099605246248688   | ENSMUST0000028295  | ENSMUST0000028295   | Dnlz      |
| ENSMUST00000155537 | 5281.1733800.4327738240.190770852-2.2685531800.0232955110.0996065246248688 | ENSMUST00000155537 | ENSMUST0000027074   | Slc34a3   |
| ENSMUST00000307472 | 4091.3476350.2783383300.1227012702.2684225640.0233034630.0996307940674139  | ENSMUST00000307472 | ENSMUST00000307472  | Lang8     |
| ENSMUST00000097820 | 2260.9832820.3623664930.1597512502.2683171080.0233098850.0996491653016115  | ENSMUST00000097820 | ENSMUST00000097820  | Arhgef10l |
| ENSMUST0000030903  | 3860.4587730.538102110.237226722-2.268303100.0233107390.0996491653016115   | ENSMUST0000030903  | ENSMUST0000030903   | Atad3a    |
| ENSMUST00000132495 | 1440.0883110.4549484130.2005751882.2682187970.0233158740.                  |                    |                     |           |

|                     |                                                                           |                     |                     |              |
|---------------------|---------------------------------------------------------------------------|---------------------|---------------------|--------------|
| ENSMUST00000165885  | 344.66792180.4878139630.2153563672.2651476200.0235036220.100245903988242  | ENSMUST00000165885  | ENSMUSG00000091443  | Gm17023      |
| ENSMUST00000149299  | 117.71862730.7948205540.3508928992.2651371830.0235042620.100245903988242  | ENSMUST00000149299  | ENSMUSG00000021464  | Ror2         |
| ENSMUST00000090379  | 3455.4447770.6659613630.2940481542.2648037520.0235247250.100326783042697  | ENSMUST00000090379  | ENSMUSG00000039701  | Usp53        |
| ENSMUST00000168020  | 17157.127390.565961080.2499011342.264739950.0235286410.100330689580308    | ENSMUST00000168020  | ENSMUSG00000004609  | Anxa1        |
| ENSMUST00000004786  | 5371.579884-0.437565230.1932070922.264747250.0235281930.100330689580308   | ENSMUST00000004786  | ENSMUSG00000004267  | Polr2e       |
| ENSMUST00000128185  | 17673.256790.437428730.1931496350.264714260.0235302190.100330326112961    | ENSMUST00000128185  | ENSMUSG00000004090  | Sh3bnp1      |
| ENSMUST00000144009  | 390.11150760.4890860000.2159785082.264512370.0235426190.100367857163728   | ENSMUST00000144009  | ENSMUSG00000042323  | Pbrm1        |
| ENSMUST00000148624  | 1113.1707170.5052257890.2231069550.2645003970.0235433550.100367857163728  | ENSMUST00000148624  | ENSMUSG00000003932  | Wdr45        |
| ENSMUST00000139434  | 1166.7514860.5626743360.2484728652.2645303130.0235451270.100367857163728  | ENSMUST00000139434  | ENSMUSG00000027589  | Pcmtd2       |
| ENSMUST00000167813  | 83.61476880.7682009330.3392459742.2644364000.0235472810.100378224669582   | ENSMUST00000167813  | ENSMUSG00000021257  | Angel1       |
| ENSMUST00000031627  | 11192.85655-0.359786640.1588895242.264382440.0235506020.100385963509132   | ENSMUST00000031627  | ENSMUSG00000029623  | Pdp1         |
| ENSMUST00000141362  | 367.33058490.4645988210.2051814022.2643320300.0235537000.100386380677959  | ENSMUST00000141362  | ENSMUSG00000024818  | Slc25a45     |
| ENSMUST00000134033  | 850.6461871-0.570035500.20517450802.2643336230.0235534420.100386380677959 | ENSMUST00000134033  | ENSMUSG00000023051  | Tarbp2       |
| ENSMUST00000114285  | 3030.9731040.3331549080.1471571782.2639392150.0235778530.10048291970527   | ENSMUST00000114285  | ENSMUSG00000029101  | Rgs12        |
| ENSMUST00000112275  | 281.7275602-0.7364911120.3253982102.263353320.0236139170.100612614183281  | ENSMUST00000112275  | ENSMUSG00000029591  | Ung          |
| ENSMUST00000144121  | 4841.2454630.3359865070.1484463240.2633534940.0236139070.100612614183281  | ENSMUST00000144121  | ENSMUSG00000049550  | Clip1        |
| ENSMUST00000123560  | 1055.7361370.3698114410.1633908932.2633540490.0236138720.100612614183281  | ENSMUST00000123560  | ENSMUSG00000025736  | Jmj3d8       |
| ENSMUST00000155830  | 7893.2210950.4482230320.1980363832.263367870.0236149360.100612614183281   | ENSMUST00000155830  | ENSMUSG00000026822  | Lcn2         |
| ENSMUST00000111248  | 1854.1624210.4448005900.1965254842.2633227090.0236158030.100612614183281  | ENSMUST00000111248  | ENSMUSG00000027198  | Ext2         |
| ENSMUST00000144375  | 7975.937878-0.340953820.1506538370.263160550.0236257930.100642361047827   | ENSMUST00000144375  | ENSMUSG00000029622  | Arcp1b       |
| ENSMUST00000146551  | 692.4704788-0.4217559990.1863553552.263181530.0236245010.100642361047827  | ENSMUST00000146551  | ENSMUSG00000007610  | Gtpbp3       |
| ENSMUST00000148428  | 238.3691219-0.859580210.3798234344-2.263104790.0236292340.10065609867705  | ENSMUST00000148428  | ENSMUSG000000048428 | Zw1ch        |
| ENSMUST000000063988 | 3100.9754540.3167327010.1399596992.2630278770.0236339770.100664379112052  | ENSMUST000000063988 | ENSMUSG00000027630  | Tbl1xv1      |
| ENSMUST00000090537  | 11.429123251.0247999680.4528540412.2629807760.0236368770.100670351463463  | ENSMUST00000090537  | ENSMUSG00000038311  | 241001717Rik |
| ENSMUST00000171128  | 93.336581750.8255296490.3648229323.2628228570.0236466110.100705398913073  | ENSMUST00000171128  | ENSMUSG00000046329  | Slc25a23     |
| ENSMUST00000124587  | 2007.1405100.3339745230.1475940692.2627909420.0236485790.100707371979775  | ENSMUST00000124587  | ENSMUSG00000020176  | Grb10        |
| ENSMUST00000144508  | 1145.9881230.5265304860.2327210092.2624965740.0236667400.100778296226575  | ENSMUST00000144508  | ENSMUSG00000014508  | Clp3         |
| ENSMUST00000171012  | 38.053926360.8948281200.3955200102.2624092230.0236721310.100794839669328  | ENSMUST00000171012  | NA                  | Na           |
| ENSMUST00000134497  | 666.04068710.4859268250.2147897792.2623368140.0236766010.100802610931862  | ENSMUST00000134497  | ENSMUSG00000042625  | Safb2        |
| ENSMUST00000149307  | 315.21589270.5323025150.2352894202.2623308550.0236766960.100802610931862  | ENSMUST00000149307  | NA                  | Na           |
| ENSMUST00000107417  | 21692.757270.3555688740.1571827892.2621361680.0236889910.1008449890233    | ENSMUST00000107417  | ENSMUSG00000017417  | Shc1         |
| ENSMUST00000176829  | 94.594844540.6816064430.3013130092.2621208560.0236899370.1008449890233    | ENSMUST00000176829  | ENSMUSG00000033713  | Foxn3        |
| ENSMUST00000139476  | 5492.1587690.3555485520.1571818342.2620206300.0236961280.100864928557629  | ENSMUST00000139476  | ENSMUSG00000026473  | Glul         |
| ENSMUST00000174741  | 13.96500323-0.1016410930.4493831542.261791350.0237102970.10090955019385   | ENSMUST00000174741  | ENSMUSG00000007035  | Msh5         |
| ENSMUST00000132915  | 336.53210410.5272050000.2330931892.261777930.0237113520.10090955019385    | ENSMUST00000132915  | ENSMUSG00000046862  | Pramef8      |
| ENSMUST00000143809  | 309.0932624-0.562453530.2486731762.261818270.0237086330.10090955019385    | ENSMUST00000143809  | ENSMUSG00000026672  | Optn         |
| ENSMUST00000162439  | 3883.5265570.3533926950.1562539742.2616557260.0237186820.100929774594384  | ENSMUST00000162439  | ENSMUSG000000162439 | Shox2        |
| ENSMUST00000093923  | 10143.751050.3553833730.1571345712.2616552130.0237189040.100929774594384  | ENSMUST00000093923  | ENSMUSG00000020687  | Cdc27        |
| ENSMUST00000111802  | 5750.0872520.3653650720.1615668482.2613863880.0237353400.100982769159465  | ENSMUST00000111802  | ENSMUSG00000019465  | Erp29        |
| ENSMUST00000063905  | 8202.7926370.3196252760.1413384582.2614176000.0237334090.100982769159465  | ENSMUST00000063905  | ENSMUSG00000049550  | Clip1        |
| ENSMUST00000131595  | 639.31023260.5559380590.2458404392.2613775880.0237358850.100982769159465  | ENSMUST00000131595  | ENSMUSG00000045312  | Lhfpl2       |
| ENSMUST00000021079  | 1925.787878-0.384784460.1701576712.261340680.0237381680.100986062812744   | ENSMUST00000021079  | ENSMUSG00000018658  | Ict1         |
| ENSMUST00000112540  | 1162.4561400.435031210.1923831120.261275480.0237422030.10099385588661     | ENSMUST00000112540  | ENSMUSG000000112540 | Zfp932       |
| ENSMUST00000102842  | 102294.4365-0.336659110.1488801732.261275660.0237421920.10099385588661    | ENSMUST00000102842  | ENSMUSG00000020458  | Rtn4         |
| ENSMUST00000122994  | 1956.693877-0.436906020.19323150852.261241790.0237442880.100992836188416  | ENSMUST00000122994  | ENSMUSG000000122994 | Gusb         |
| ENSMUST00000078830  | 102299.3510-0.336542610.14888345782.261185640.0237477630.101001198581134  | ENSMUST00000078830  | ENSMUSG00000020458  | Rtn4         |
| ENSMUST00000100706  | 1258.7083550.3339875950.1477067872.2611526590.0237498050.1010030424986115 | ENSMUST00000100706  | ENSMUSG00000002986  | Tctn2        |
| ENSMUST00000029740  | 4196.813251-0.329684730.1458134132.261004180.0237589970.101036135062281   | ENSMUST00000029740  | ENSMUSG00000028098  | Rnf115       |
| ENSMUST00000067284  | 6307.3979290.393252960.1739500362.260723670.0237763730.101103600185299    | ENSMUST00000067284  | ENSMUSG000000067284 | Cpsf3        |
| ENSMUST00000148471  | 2053.774007-0.692108010.3061556782.260640800.0237815080.101119011400414   | ENSMUST00000148471  | ENSMUSG00000005634  | Lig1         |
| ENSMUST00000136644  | 952.19550930.4340520860.1920066842.2606092470.0237834640.101120902398686  | ENSMUST00000136644  | ENSMUSG000000136644 | Atxn7l1      |
| ENSMUST00000139994  | 896.9203432-0.705103170.3119197042.260527840.0237885100.10112620561295    | ENSMUST00000139994  | NA                  | Na           |
| ENSMUST00000150092  | 582.4447207-0.745879280.3299597462.260515980.0237892450.10112620561295    | ENSMUST00000150092  | ENSMUSG000000150092 | Zfp945       |
| ENSMUST00000017078  | 3455.037615-0.441753050.1954209522.260520420.0237889700.10112620561295    | ENSMUST00000017078  | NA                  | Na           |
| ENSMUST00000058538  | 1317.814146-0.410577150.1816350652.260450910.0237932790.10113692961531    | ENSMUST00000058538  | ENSMUSG00000058538  | Rassf8       |
| ENSMUST00000159694  | 2046.943572-0.345954100.1530512182.260381210.0237976010.10114647968479    | ENSMUST00000159694  | ENSMUSG00000040331  | Nsmce4a      |
| ENSMUST000001989104 | 1525.194856-0.502860190.2224684892.260365920.0237985490.10114647968479    | ENSMUST000001989104 | ENSMUSG000000098104 | Cd72         |
| ENSMUST00000116223  | 2310.127242-0.392490200.1736634812.260061800.0238174150.101200953236349   | ENSMUST00000116223  | ENSMUSG00000026510  | Trp53bp2     |
| ENSMUST00000177475  | 309.19007010.7492400040.3315129472.2600625740.0238173670.101200953236349  | ENSMUST00000177475  | ENSMUSG000000166273 | Igdc4        |
| ENSMUST00000054684  | 5316.8912930.3855781440.1706008962.2601179230.0238139330.101200953236349  | ENSMUST00000054684  | ENSMUSG00000020376  | Rnf130       |
| ENSMUST00000156326  | 4084.1230830.3795158870.1679222052.2600696980.0238169250.101200953236349  | ENSMUST00000156326  | ENSMUSG000000156326 | Trmub2       |
| ENSMUST00000154271  | 1095.482123-0.385164380.1704256992.260013480.0238204130.101207266697072   | ENSMUST00000154271  | ENSMUSG00000078931  | Pdf          |
| ENSMUST00000056129  | 28.24331182-0.962431910.4258749202.259893370.0238278690.101226088055648   | ENSMUST00000056129  | ENSMUSG000000056129 | Npas4        |
| ENSMUST0000023514   | 616.4952474-0.467225150.2067464092.259894860.0238277760.101226088055648   | ENSMUST0000023514   | ENSMUSG00000023514  | Ndufr4       |
| ENSMUST00000127531  | 2506.406048-0.458312510.2028079912.259834580.0238315180.10123516696535    | ENSMUST00000127531  | NA                  | Na           |
| ENSMUST00000115329  | 1392.5588150.3550598120.1571217722.2597747340.0238352350.1012445266499663 | ENSMUST00000115329  | ENSMUSG000000029676 | Pot1a        |
| ENSMUST00000136031  | 34.46429660-0.967125420.4279808522.259739940.0238373950.101247275921368   | ENSMUST00000136031  | ENSMUSG000000036031 | Ahy2         |
| ENSMUST00000148744  | 1785.5843430.3476697100.1538708972.2594897140.0238529390.101306867214484  | ENSMUST00000148744  | ENSMUSG00000039159  | Ube2h        |
| ENSMUST00000162470  | 73.30867768-0.838163750.3799808232.259318280.0238635930.101345682586808   | ENSMUST00000162470  | ENSMUSG000000162470 | Phyhlpl      |
| ENSMUST00000169578  | 164.4994380.6328427830.2801096502.2592680480.0238667160.101352513739141   | ENSMUST00000169578  | NA                  | Na           |
| ENSMUST00000023487  | 13886.60324-0.443700200.1964048352.259110380.0238765190.101387710927877   | ENSMUST00000023487  | ENSMUSG000000023487 | Arhgap31     |
| ENSMUST00000092219  | 6616.391287-0.602975040.2669137702.259063080.0238794600.10139376700773    | ENSMUST00000092219  | ENSMUSG00000019961  | Tmpo         |
| ENSMUST00000044530  | 1247.283321-0.448035690.1983308532.259031720.0238814110.101395615499014   | ENSMUST00000044530  | ENSMUSG00000044530  | Smyd4        |
| ENSMUST00000131197  | 756.6022965-0.470007680.2080697702.258894640.0238899390.101425387031266   | ENSMUST00000131197  | ENSMUSG00000028402  | Mpdz         |
| ENSMUST00000124987  | 159.7316057-0.691695910.3062159452.258850060.0238927120.101430727432041   | ENSMUST00000124987  | ENSMUSG00000028737  | Altd4a1      |
| ENSMUST00000099355  | 6399.026150.599400240.2653709362.258726060.0239043000.101453024666028     | ENSMUST00000099355  | ENSMUSG00000099355  | Tmpo         |
| ENSMUST00000124684  | 1088.2439840.3498839370.1549035832.2587207370.0239007610.101452024666028  | ENSMUST00000124684  | ENSMUSG00000014684  | Acx1         |
| ENSMUST00000102827  | 31.464762831.025127310.0453890232.2584969690.0239146930.10147663751592    | ENSMUST00000102827  | ENSMUSG000000102827 | Icos         |
| ENSMUST00000155038  | 284.94114990.531877630.2354961362.258540780.0239119640.10147663751592     | ENSMUST00000155038  | ENSMUSG00000013150  | Gfo2d        |
| ENSMUST00000001699  | 3574.227982-0.443902020.1965471872.258501000.0239144410.10147663751592    | ENSMUST00000001699  | ENSMUSG00000001699  | Hoxc10       |
| ENSMUST00000174689  | 5865.810593-0.309430690.1370073472.258497110.0239146430.10147663751592    | ENSMUST00000174689  | ENSMUSG00000007739  | Ct4          |
| ENSMUST00000149615  | 5877.882375-0.359845620.1593293952.258501160.0239144410.10147663751592    | ENSMUST00000149615  | ENSMUSG00000009549  | Srp14        |
| ENSMUST00000059826  | 817.98937780.9940137720.4401233742.2584889360.0239151930.10147663751592   | ENSMUST00000059826  | ENSMUSG00000050556  | Kcnb1        |
| ENSMUST00000139903  | 42.45811753-0.997934990.4418676792.258447580.0239177690.10149157380648    | ENSMUST00000139903  | ENSMUSG000000139903 | Spint1       |
| ENSMUST00000144701  | 1127.1242290.4952708130.21932                                             |                     |                     |              |

|                    |                                                                             |                    |                     |            |
|--------------------|-----------------------------------------------------------------------------|--------------------|---------------------|------------|
| ENSMUST00000176533 | 54.18253869 1.0062443160.4461462862 2.2554134090.0241073910.102053960427627 | ENSMUST00000176533 | ENSMUSG00000079657  | Rab26      |
| ENSMUST00000173199 | 2873.7002720.4613794100.0204564401.2.2554237500.0241067430.102053960427627  | ENSMUST00000173199 | ENSMUSG00000071454  | Dtnb       |
| ENSMUST00000154494 | 4896.9867660.5115777030.2268249272.2553857260.0241091270.102053960427627    | ENSMUST00000154494 | ENSMUSG00000041932  | Agrrn      |
| ENSMUST00000111961 | 22115.34189-0.292028930.129488241-2.25255446 0.0241173600.10208004786631    | ENSMUST00000111961 | ENSMUSG00000059005  | Hnrrnpa3   |
| ENSMUST00000141522 | 62.513524390.9149960560.4077309692.2551538270.0241236740.102093857772228    | ENSMUST00000141522 | ENSMUSG00000019320  | Noxo1      |
| ENSMUST00000144331 | 112.1441610-0.870351230.385937422-2.2516155 0.0241231900.10209385772228     | ENSMUST00000144331 | ENSMUSG00000023927  | Satb1      |
| ENSMUST00000174290 | 2736.5672330.454798504.0.2016819192.2550286440.0241315300.102120646552466   | ENSMUST00000174290 | ENSMUSG00000071454  | Dtnb       |
| ENSMUST00000222224 | 4332.642338-0.31348293 0.139019478-2.254956880.0241360340.102133248241718   | ENSMUST00000222224 | ENSMUSG00000022711  | Trappc13   |
| ENSMUST0000048880  | 12.251933340.9286245100.4118198392.2549290260.0241377840.102134191008342    | ENSMUST0000048880  | ENSMUSG00000041886  | Macc1      |
| ENSMUST00000134844 | 3546.969756-0.34240517 0.151850603-2.254881870.0241407440.102140252709554   | ENSMUST00000134844 | ENSMUSG00000028582  | Cc2d1b     |
| ENSMUST00000137310 | 621.3765277-0.58863796.0.261058029-2.254816540.0241448460.10215156625574    | ENSMUST00000137310 | ENSMUSG00000031826  | Usp10      |
| ENSMUST00000154423 | 6294.917516-0.369295020.163792249-2.25465507 0.0241549870.102187600760044   | ENSMUST00000154423 | ENSMUSG00000154423  | Vcp        |
| ENSMUST00000166324 | 593.1501804.3659357660.1623205472.2544019960.0241708890.102243192104759     | ENSMUST00000166324 | NA                  | NA         |
| ENSMUST00000143225 | 3897.788329-0.387617510.171938420-2.25439731 0.0241711840.102243192104759   | ENSMUST00000143225 | ENSMUSG00000020097  | Sgpl1      |
| ENSMUST00000064495 | 1443.2726570.3836879890.1702073002.2542393220.024811160.102278739338694     | ENSMUST00000064495 | ENSMUSG00000052566  | Hook2      |
| ENSMUST00000114283 | 2978.7744270.3352616270.1487334532.2541104220.0241892220.102300092800823    | ENSMUST00000114283 | ENSMUSG00000029101  | Rgs12      |
| ENSMUST0000072239  | 6769.662578-0.599934370.266149830-2.254122710.0241884480.102300092800823    | ENSMUST0000072239  | ENSMUSG000000119961 | Tmpo       |
| ENSMUST00000107754 | 197958.70280.9711158710.4308270342.254073660.0249153430.10230405949036      | ENSMUST00000107754 | NA                  | NA         |
| ENSMUST00000140976 | 369.90721350.4232132520.1877692472.2539007780.02420204100.10234293338079    | ENSMUST00000140976 | ENSMUSG00000037622  | Wdctc1     |
| ENSMUST00000085918 | 10393.248110.2752600780.1221379232.2536823080.0242161610.102349937283321    | ENSMUST00000085918 | NA                  | NA         |
| ENSMUST00000162061 | 1829.078790.3364570950.1492827072.2538249740.0242071810.102349937283321     | ENSMUST00000162061 | ENSMUSG00000025188  | Hps1       |
| ENSMUST00000039896 | 348.43203140.6383328200.2832381312.2536966190.0242152600.102349937283321    | ENSMUST00000039896 | NA                  | NA         |
| ENSMUST00000033493 | 24333.021200.3365259040.1493228392.2536800560.0242163020.102349937283321    | ENSMUST00000033493 | ENSMUSG00000003402  | Prkcsch    |
| ENSMUST00000115331 | 24333.021200.3365259040.1493228392.2536800560.0242163020.102349937283321    | ENSMUST00000115331 | ENSMUSG00000015331  | Prkcsch    |
| ENSMUST00000162451 | 602.26703790.3961720010.175785551-2.253723430.0242135720.102349937283321    | ENSMUST00000162451 | ENSMUSG00000001366  | Fbxp9      |
| ENSMUST00000174614 | 740.2692073-0.501076450.222322815-2.253823820.0242072530.102349937283321    | ENSMUST00000174614 | ENSMUSG00000015461  | Atfbf6     |
| ENSMUST00000109076 | 329.0644502-0.559195380.248119574-2.253733430.0242129420.102349937283321    | ENSMUST00000109076 | ENSMUSG00000020389  | Cdk13      |
| ENSMUST00000124220 | 1452.745474-0.4441409510.195899940-2.253239660.0242440010.10246070438675    | ENSMUST00000124220 | ENSMUSG00000027472  | Pdgr1      |
| ENSMUST00000068259 | 6020.1799130-0.28890647 0.182220825-2.253194610.0242468810.102466232183332  | ENSMUST00000068259 | ENSMUSG000000068259 | Klhdcd10   |
| ENSMUST00000101562 | 1215.9766510-0.377732820.167647218-2.253141040.02425502570.10247028957563   | ENSMUST00000101562 | ENSMUSG00000052632  | Asap2      |
| ENSMUST00000163847 | 2939.614528-0.611123110.271241019-2.25306302 0.0242551750.102488338609453   | ENSMUST00000163847 | NA                  | NA         |
| ENSMUST00000131743 | 5369.649326-0.435641310.193381196-2.252759410.0242743220.10256276842309     | ENSMUST00000131743 | ENSMUSG00000004667  | Polr2e     |
| ENSMUST00000143307 | 283.90855830.4798213390.212998580.2526973580.0242788270.10257833195372      | ENSMUST00000143307 | ENSMUSG00000020815  | Ctso       |
| ENSMUST00000008032 | 15844.913620.5016909110.2227103542.2526609200.0242805360.102576070598622    | ENSMUST00000008032 | ENSMUSG00000007888  | Crf1       |
| ENSMUST00000169480 | 111.1659240-0.869390400.38594602-2.25261954 0.0242831470.102580625751719    | ENSMUST00000169480 | ENSMUSG00000023927  | Satb1      |
| ENSMUST00000151877 | 342.37329880.5931048080.2633095512.2525001620.0242906820.102605976986767    | ENSMUST00000151877 | ENSMUSG00000049811  | Fam161a    |
| ENSMUST00000042755 | 16.48296070-1.022565640.454028029-2.252208180.024309100.102607373540946     | ENSMUST00000042755 | ENSMUSG000000042755 | Afp        |
| ENSMUST00000034026 | 104.15230660.7966493440.3537269342.2521591310.0243122170.102683980004227    | ENSMUST00000034026 | ENSMUSG00000031613  | Hpgd       |
| ENSMUST00000133556 | 378.30411210.4403973900.1955469322.2521314180.0243139680.102684893385729    | ENSMUST00000133556 | ENSMUSG00000015356  | Rubcn      |
| ENSMUST00000147426 | 388.93902430.4618532540.2050785172.2520801320.0243172080.102692096710307    | ENSMUST00000147426 | ENSMUSG00000040964  | Ahrhgfe10l |
| ENSMUST00000017572 | 13491.53990-0.303864150.134929110-2.252028150.0243204920.102699484126916    | ENSMUST00000017572 | ENSMUSG00000017428  | Psmd11     |
| ENSMUST00000084124 | 38961.40242-0.364363640.161796449-2.251987850.0243230390.102703757194373    | ENSMUST00000084124 | ENSMUSG00000028961  | Pgd        |
| ENSMUST00000139675 | 953.6961990-0.380015950.168750038-2.251945890.0243256910.102730453726364    | ENSMUST00000139675 | ENSMUSG000000139675 | Brd7       |
| ENSMUST00000049081 | 2830.7685160.3037199870.1348705502.2519370400.0243262500.102730453726364    | ENSMUST00000049081 | ENSMUSG00000040928  | S100pbp    |
| ENSMUST00000078155 | 6061.1293600.3909416950.1736993102.2518475180.024319090.102719080518677     | ENSMUST00000078155 | ENSMUSG000000078155 | Impdh1     |
| ENSMUST00000164922 | 320.2203208-0.535618090.237858681-2.25183330.0243328080.102719080518677     | ENSMUST00000164922 | ENSMUSG00000029771  | Irf5       |
| ENSMUST00000035177 | 3851.487514-0.39635437 0.176016116-2.25180727 0.0243344530.10271954779547   | ENSMUST00000035177 | ENSMUSG000000035177 | Mrp13      |
| ENSMUST00000108926 | 233.10479200.6387200430.2836728602.2516078610.02434056030.102766293420023   | ENSMUST00000108926 | ENSMUSG00000074519  | Etoh1i     |
| ENSMUST00000133341 | 245.079430-0.88447676 0.392829672-2.251552830.0243505400.102774520444492    | ENSMUST00000133341 | ENSMUSG00000008193  | Gm16548    |
| ENSMUST00000129760 | 801.9736779.1013531940.4501626812.2514792600.0243551980.102778664342978     | ENSMUST00000129760 | ENSMUSG00000028545  | Bend5      |
| ENSMUST00000129310 | 2679.6778840.2900284750.1288202942.2514191290.0243590030.102797238322219    | ENSMUST00000129310 | ENSMUSG00000022214  | Dcaf11     |
| ENSMUST00000118737 | 2780.8407270.4623708580.2053776382.2513203620.0243652540.102817131265363    | ENSMUST00000118737 | ENSMUSG00000018737  | Tmem159    |
| ENSMUST00000170656 | 2258.316614-0.347580080.154398901-2.25118237 0.0243739880.102847505702068   | ENSMUST00000170656 | NA                  | NA         |
| ENSMUST00000140808 | 19.78666717-0.962169530.4247402586-2.251107150.0243787510.102861115113035   | ENSMUST00000140808 | ENSMUSG00000027199  | Gatm       |
| ENSMUST00000098561 | 1442.1774160.3830895600.1701882432.2509754440.0243870920.10288446329199     | ENSMUST00000098561 | NA                  | NA         |
| ENSMUST00000155194 | 728.2800861-0.61886292 0.274931490-2.250971390.0243873480.102884416329199   | ENSMUST00000155194 | ENSMUSG00000028896  | Rcc1       |
| ENSMUST00000172615 | 2708.471837-0.340301270.151203607-2.250616110.02440098610.102972900547938   | ENSMUST00000172615 | ENSMUSG000000172615 | Psmd11     |
| ENSMUST00000115378 | 61.549517320.93375981300.4166165702.2505060920.0244168370.10299174488033    | ENSMUST00000115378 | ENSMUSG00000040570  | Rundcb3b   |
| ENSMUST00000149327 | 777.93698630.4262446090.1894002032.2504971080.0244174060.10299174488033     | ENSMUST00000149327 | ENSMUSG000000149327 | Fbx120     |
| ENSMUST00000081335 | 837.84265460.3587677030.1594304452.2503806030.02442293620.103035677512924   | ENSMUST00000081335 | ENSMUSG000000081335 | Tgfr2      |
| ENSMUST00000148895 | 7298.366689-0.324599610.144248741-2.25027691 0.0244313720.103037662474328   | ENSMUST00000148895 | ENSMUSG000000148895 | Psmd11     |
| ENSMUST00000153453 | 616.86932520.4244691040.1886378042.2501804760.02443349610.103056971988264   | ENSMUST00000153453 | ENSMUSG00000041598  | Cdc42ep4   |
| ENSMUST00000132303 | 14698.468810.4247785700.1887931862.2499676910.0244505990.103081444524008    | ENSMUST00000132303 | ENSMUSG00000132303  | Cd81       |
| ENSMUST00000128639 | 95.70416393-0.624975030.277765836-2.250006860.0244485090.103081444524008    | ENSMUST00000128639 | NA                  | NA         |
| ENSMUST00000129667 | 92.78828166-0.90846092 0.403763998-2.249980010.0244502130.103081444524008   | ENSMUST00000129667 | ENSMUSG00000023927  | Satb1      |
| ENSMUST00000141071 | 4757.9669380.2907652840.1292300222.2499824710.0244500580.103081444524008    | ENSMUST00000141071 | ENSMUSG00000025162  | Csmk1d     |
| ENSMUST00000107359 | 1064.538061-0.411866840.183052117-2.249997710.0244490900.103081444524008    | ENSMUST00000107359 | ENSMUSG00000039270  | Megf9      |
| ENSMUST00000111741 | 6070.8251000.3203551330.1427952522.2497599290.0244641880.103124068993651    | ENSMUST00000111741 | ENSMUSG00000025026  | Add3       |
| ENSMUST00000174130 | 827.15722400.3752130730.1667783392.2497710100.0244634850.103124068993651    | ENSMUST00000174130 | ENSMUSG000000174130 | Rorb       |
| ENSMUST00000107009 | 1410.763014-0.595106950.264530474-2.24967258 0.02446697360.103140958700044  | ENSMUST00000107009 | ENSMUSG00000034810  | Nsf        |
| ENSMUST00000134174 | 1558.147640-0.490683500.218131509-2.249484770.0244816730.10318476024806     | ENSMUST00000134174 | ENSMUSG000000134174 | Gar1       |
| ENSMUST00000038327 | 45.89332777-0.962562380.427913060-2.249434450.0244848690.103189601111798    | ENSMUST00000038327 | ENSMUSG00000038227  | Ackr1      |
| ENSMUST00000170183 | 117.6186625-0.858376540.381599362-2.24941817 0.0244859030.103189601111798   | ENSMUST00000170183 | NA                  | NA         |
| ENSMUST00000176520 | 3744.5361990.51765808030.2301542312.2491790810.0245011040.103247161856211   | ENSMUST00000176520 | ENSMUSG0000002996   | Hbp1       |
| ENSMUST00000169817 | 664.6767743 0.625197420.277976945-2.249088130.0245062530.10326355757353     | ENSMUST00000169817 | ENSMUSG00000020212  | Mdm1       |
| ENSMUST00000144090 | 175.39018150.5884934340.2616702992.2489882740.0245132420.103278797169186    | ENSMUST00000144090 | ENSMUSG00000014090  | Ccl27a     |
| ENSMUST00000173865 | 175.39018150.5884934340.2616702992.2489882740.0245132420.103278797169186    | ENSMUST00000173865 | ENSMUSG00000073865  | Ccl27a     |
| ENSMUST00000163497 | 130.42651780.5810822610.2583798522.2489457160.0245159490.10328702994978     | ENSMUST00000163497 | ENSMUSG000000163497 | Rhobt1b1   |
| ENSMUST00000138193 | 1226.072481-0.393049380.174781240-2.248807630.0245247370.103314218268921    | ENSMUST00000138193 | ENSMUSG00000024054  | Smcdh1     |
| ENSMUST00000170167 | 2071.851826-0.43249255 0.192325078-2.248757950.0245278990.10332105798295    | ENSMUST00000170167 | ENSMUSG00000052033  | Pfn4a      |
| ENSMUST00000042167 | 5068.2008140.6545816340.2911270682.2484396170.0245481770.103386904893589    | ENSMUST00000042167 | ENSMUSG00000039007  | Cpq        |
| ENSMUST00000084039 | 4640.732574-0.417860440.185841481-2.248477770.0245457400.103386904893589    | ENSMUST00000084039 | NA                  | NA         |
| ENSMUST00000123465 | 2982.254891-0.556088890.247321273-2.248447470.0245457600.103386904893589    | ENSMUST00000123465 | ENSMUSG00000023465  | Stoml2     |
| ENSMUST0000025464  | 3165.024485-0.369318570.1642947532.247902430.0245824110.10352459641612      | ENSMUST0000025464  | ENSMUSG00000025464  | Txn14a     |
| ENSMUST00000167779 | 216.7704042-0.66134125 0.294211320-2.                                       |                    |                     |            |

|                    |                                                                                   |                    |                     |               |
|--------------------|-----------------------------------------------------------------------------------|--------------------|---------------------|---------------|
| ENSMUST0000050207  | 868.0547227 - 0.40609356 0.180863668 - 2.24530203 0.024748440.103996032266086     | ENSMUST0000050207  | ENSMUST00000046909  | Tefm          |
| ENSMUST00000161905 | 164.65521790.6288713430.280091282 2.2452371170.0247529140.104007002958304         | ENSMUST00000161905 | NA                  | NA            |
| ENSMUST00000153575 | 3232.350618 - 0.39642412 0.176568080 - 2.24516301 0.0247576690.104020451590755    | ENSMUST00000153575 | NA                  | NA            |
| ENSMUST00000123111 | 8009.273339 - 0.379064270 0.168858247 - 2.24486683 0.0247766820.104093800414323   | ENSMUST00000123111 | ENSMUSG00000029623  | Pdp1p1        |
| ENSMUST00000125921 | 434.6377890 - 0.59993711 0.267259272 - 2.244775670 0.0247825370.104111861232698   | ENSMUST00000125921 | ENSMUSG000000086322 | E130218I03Rik |
| ENSMUST0000097995  | 1254.539146 0.510362993 0.227368114 2.2446550810 0.0247902830 0.104137866166347   | ENSMUST0000097995  | NA                  | NA            |
| ENSMUST00000176553 | 767.11129380.505741683 0.225320931 2.2445392910 0.0247977230.104156043274388      | ENSMUST00000176553 | ENSMUSG00000029647  | Pan3          |
| ENSMUST00000156118 | 41.44381715 0.779491226 0.3472819492 2.2445486330 0.0247971230.104156043274388    | ENSMUST00000156118 | ENSMUSG00000023266  | Frs3          |
| ENSMUST00000165735 | 217.6499765 0.7509364280 0.3345819602 2.2444020200 0.0248065460.104182506355698   | ENSMUST00000165735 | ENSMUSG00000001348  | AcP5          |
| ENSMUST00000140844 | 4140.905619 - 0.3562161210 0.158713803 - 2.24439282 0.0248071370.104182506355698  | ENSMUST00000140844 | ENSMUSG00000020738  | Sum2          |
| ENSMUST00000131849 | 665.8029367 - 0.763614310 0.340260573 - 2.24420450 0.0248192460.104226817832919   | ENSMUST00000131849 | ENSMUSG00000003438  | Timm50        |
| ENSMUST00000094312 | 2276.3215130.562213435 0.250529901 2.2440971390 0.0248261510.10422965296167       | ENSMUST00000094312 | ENSMUSG00000094312  | Rgma          |
| ENSMUST00000107458 | 2276.3215130.562213435 0.250529901 2.2440971390 0.0248261510.10422965296167       | ENSMUST00000107458 | NA                  | NA            |
| ENSMUST00000070117 | 3948.391870 - 0.30853012 0.137482802 - 2.24413610 0.0248236450.10422965296167     | ENSMUST00000070117 | ENSMUSG00000056167  | Cnot10        |
| ENSMUST00000122419 | 306.0914902 0.560886905 0.249935592 2.2441257720 0.0248243100.10422965296167      | ENSMUST00000122419 | ENSMUSG00000021062  | Rab15         |
| ENSMUST00000113215 | 2092.322518 - 0.34116386 0.152052303 - 2.24372705 0.0248499680.104323098576535    | ENSMUST00000113215 | ENSMUSG00000032261  | Sh3bgrl2      |
| ENSMUST00000165412 | 1785.489302 - 0.427646090 0.190599139 - 2.24369375 0.0248512120.104325553471382   | ENSMUST00000165412 | NA                  | NA            |
| ENSMUST00000157041 | 6124.0878790.5090328460.2268810612 2.243611001 0.0248574400.104334831724947       | ENSMUST00000157041 | ENSMUSG00000021109  | Hfl1a         |
| ENSMUST00000164892 | 24437.15245 0.359623353 0.160284762 2.2436287910 0.0248562950 0.104334831724947   | ENSMUST00000164892 | NA                  | NA            |
| ENSMUST00000128386 | 120.5576160 - 0.68939719 0.307289787 - 2.24347576 0.0248661500 0.104364844383038  | ENSMUST00000128386 | ENSMUSG00000055491  | Pprc1         |
| ENSMUST00000146183 | 759.8116527 - 0.52833849 0.235504223 - 2.24343531 0.0248687560 0.104369234594951  | ENSMUST00000146183 | ENSMUSG00000002767  | Mrp2l         |
| ENSMUST00000129621 | 227.1416480 0.542227405 0.241702539 2.243366600 0.0248731830 0.104381267820403    | ENSMUST00000129621 | ENSMUSG00000035696  | Rnf38         |
| ENSMUST00000112688 | 3207.372525 - 0.36086097 0.160877974 - 2.24307257 0.0248921340 0.104454247538622  | ENSMUST00000112688 | ENSMUSG00000026377  | Nifk          |
| ENSMUST00000151941 | 259.72082870 0.474177155 0.211406485 2.2429640930 0.0248991300 0.1044704986914    | ENSMUST00000151941 | ENSMUSG00000041229  | Phf8          |
| ENSMUST00000164077 | 674.5127277 - 0.62257446 0.277565893 - 2.24297896 0.0248981710 0.1044704986914    | ENSMUST00000164077 | ENSMUSG00000020212  | Mdm1          |
| ENSMUST00000083292 | 72.41530965 - 0.79404380 0.354029419 - 2.24287519 0.0249048630 0.10448803563862   | ENSMUST00000083292 | ENSMUSG00000065226  | Gm25791       |
| ENSMUST00000117299 | 752.1497611 - 0.65682373 0.292865750 - 2.24274685 0.0249131430 0.104516188975515  | ENSMUST00000117299 | ENSMUSG00000076437  | Z700094K13Rik |
| ENSMUST00000060442 | 210.2901904 - 0.92445902 0.412254721 - 2.24244618 0.0249325490 0.104591044906955  | ENSMUST00000060442 | ENSMUSG00000048216  | Gpr85         |
| ENSMUST00000139118 | 843.64172580.352901941 0.157375357 2.242418620 0.0249341200 0.104591044906955     | ENSMUST00000139118 | ENSMUSG00000070517  | Zfp764        |
| ENSMUST0000015271  | 1492.3046110 0.411330180 0.183436271 2.242375602 0.0249371070 0.104597050612067   | ENSMUST0000015271  | ENSMUSG00000015127  | Unkl          |
| ENSMUST00000119206 | 2235.1267580.559268112 0.249414858 2.2423070510 0.0249406490 0.104605351708071    | ENSMUST00000119206 | ENSMUSG00000019206  | Rgma          |
| ENSMUST00000172797 | 742.3106224 - 0.430412830 0.191955887 - 2.24224865 0.0249453060 0.104618325378782 | ENSMUST00000172797 | ENSMUSG00000036273  | Lrrk2         |
| ENSMUST00000143118 | 342.6988831 - 0.46250110 0.206286221 - 2.24203585 0.0249590550 0.104665473318792  | ENSMUST00000143118 | ENSMUSG00000031840  | Rab3a         |
| ENSMUST00000174522 | 1580.879530 - 0.39832024 0.177660833 - 2.24202624 0.0249596760 0.10467543318792   | ENSMUST00000174522 | ENSMUSG00000028479  | Gne           |
| ENSMUST00000131014 | 511.8525599 - 0.55545643 0.247766335 - 2.24185595 0.0249706830 0.104705068678157  | ENSMUST00000131014 | ENSMUSG00000028719  | Cmpk1         |
| ENSMUST00000145186 | 960.0848180 0.258568971 0.170650203 2.241831330 0.0249722750 0.104705183834031    | ENSMUST00000145186 | ENSMUSG00000027829  | Ccn1l         |
| ENSMUST00000130740 | 943.97436390.435817959 0.194406867 2.2417827350 0.0249754170 0.10470545368593     | ENSMUST00000130740 | ENSMUSG00000020564  | Atxn7l1       |
| ENSMUST00000132161 | 594.5615749 - 0.45103933 0.201197453 - 2.24177455 0.0249759460 0.10470545368593   | ENSMUST00000132161 | ENSMUSG00000063450  | Syne2         |
| ENSMUST00000068705 | 2998.280923 - 0.49264421 0.219766240 - 2.24167375 0.0249824650 0.10472822358703   | ENSMUST00000068705 | ENSMUSG00000026566  | Mzp1l         |
| ENSMUST0000020437  | 675.3485331 - 0.62288585 0.277875170 - 2.24160314 0.0249870320 0.104740807031075  | ENSMUST0000020437  | ENSMUSG00000020212  | Mdm1          |
| ENSMUST00000142796 | 137.6055736 - 0.70988509 0.316723669 - 2.24133896 0.0250041270 0.104805898731011  | ENSMUST00000142796 | ENSMUSG00000020083  | 2010107G23Rik |
| ENSMUST00000121270 | 3501.293895 0.296139852 0.132132187 2.2412392970 0.0250105780 0.104826374637549   | ENSMUST00000121270 | ENSMUSG00000035545  | Lenf8         |
| ENSMUST00000133574 | 93.76795242 - 0.90729298 0.404822058 - 2.24121429 0.0250121970 0.104826592393971  | ENSMUST00000133574 | ENSMUSG00000029397  | Satb1         |
| ENSMUST0000024906  | 9997.942706 0.298360325 0.133129077 2.241135680 0.0250172870 0.104839174934068    | ENSMUST0000024906  | ENSMUSG00000024098  | Twsf1         |
| ENSMUST00000155886 | 19.83508340 0.959336050 0.428061079 2.2411195420 0.0250183320 0.104839174934068   | ENSMUST00000155886 | ENSMUSG00000046634  | Pkd1l1        |
| ENSMUST0000003818  | 5703.6466530.538506832 0.240295237 2.241021660 0.0250246710 0.104859173307781     | ENSMUST0000003818  | ENSMUSG00000003721  | Insig2        |
| ENSMUST00000151046 | 633.03953280 0.472837776 0.210997305 2.240965946 0.0250282800 0.104867729144325   | ENSMUST00000151046 | ENSMUSG00000015104  | Bach1         |
| ENSMUST00000142408 | 2483.4507680 0.5849148580 0.261018647 2.2408929920 0.0250330070 0.10488096554612  | ENSMUST00000142408 | ENSMUSG00000018819  | Lsp1          |
| ENSMUST0000036992  | 27.13151096 - 0.97696958 0.435986666 - 2.24082445 0.0250374470 0.10488436818556   | ENSMUST0000036992  | ENSMUSG00000036992  | Lmo1          |
| ENSMUST00000169172 | 1438.8137170 0.306972875 0.136990786 2.2408286270 0.0250371770 0.10488436818556   | ENSMUST00000169172 | ENSMUSG00000028030  | Tbck          |
| ENSMUST00000113579 | 3192.1715220 0.5249717280 0.234294686 2.2406471770 0.025048003300477              | ENSMUST00000113579 | NA                  | NA            |
| ENSMUST00000131471 | 1596.124131 - 0.42711044 0.190625346 - 2.24057530 0.0250535970 0.10494051919927   | ENSMUST00000131471 | ENSMUSG00000001674  | Ddx18         |
| ENSMUST00000113728 | 2612.769514 - 0.45829050 0.204548645 - 2.24049638 0.0250587150 0.1049549361778    | ENSMUST00000113728 | ENSMUSG00000017782  | Klc2          |
| ENSMUST00000204811 | 3889.3194370 0.4254393680 0.189887985 2.240475446 0.0250600730 0.1049549361778    | ENSMUST00000204811 | ENSMUSG00000024014  | Pim1          |
| ENSMUST00000108940 | 2350.3412220 0.498822691 0.222661458 2.240274069 0.0250731350 0.105003072023826   | ENSMUST00000108940 | ENSMUSG000000108940 | Gm14403       |
| ENSMUST0000046206  | 3484.6449460 0.3477257190 0.155231690 2.2400433720 0.0250881070 0.105047946607327 | ENSMUST0000046206  | ENSMUSG00000040426  | Rprd1a        |
| ENSMUST00000160914 | 2014.442310 0.329411457 0.147056009 2.240040776 0.0250882750 0.105047946607327    | ENSMUST00000160914 | ENSMUSG00000020544  | Maf1          |
| ENSMUST0000038600  | 3491.090093 - 0.32641470 0.145718481 - 2.24003639 0.0250885600 0.105047946607327  | ENSMUST0000038600  | ENSMUSG00000035772  | Mrrp2         |
| ENSMUST00000176266 | 86.06099467 - 0.85795105 0.383025877 - 2.23992974 0.0250954840 0.105070362387074  | ENSMUST00000176266 | ENSMUSG000000176266 | Ahrgap19      |
| ENSMUST0000030491  | 7760.740925 - 0.40399767 0.180366373 - 2.23987248 0.0250992020 0.105095484192387  | ENSMUST0000030491  | ENSMUSG00000028719  | Cmpk1         |
| ENSMUST00000174231 | 138.3305152 - 0.75746550 0.338186059 - 2.23798925 0.0251046070 0.1050954148499    | ENSMUST00000174231 | ENSMUSG00000021418  | Rpp40         |
| ENSMUST0000048269  | 1336.721273 - 0.34262656 0.152988822 - 2.23955295 0.0251199600 0.105153102091568  | ENSMUST0000048269  | ENSMUSG00000038671  | Arrfp1        |
| ENSMUST00000132434 | 10251.32886 0.419328911 0.187241387 2.2395097360 0.0251227680 0.105158279891666   | ENSMUST00000132434 | ENSMUSG000000132434 | Rrbp1         |
| ENSMUST00000106260 | 1111.258898 - 0.92966288 0.415130216 - 2.23944885 0.0251267250 0.105168264944368  | ENSMUST00000106260 | NA                  | NA            |
| ENSMUST00000123500 | 11121.770220 0.375230425 0.167570134 2.239244042 0.0251400410 0.10521714836272    | ENSMUST00000123500 | ENSMUSG00000123500  | Grn           |
| ENSMUST00000138647 | 270.7888770 - 0.45762638 0.204369749 - 2.23920803 0.0251423830 0.105220638992059  | ENSMUST00000138647 | ENSMUSG00000029780  | Nt5c3         |
| ENSMUST00000156817 | 169.0501716 - 0.85210779 0.380548882 - 2.23915464 0.0251458550 0.10522858917332   | ENSMUST00000156817 | ENSMUSG00000050705  | Z310061I04Rik |
| ENSMUST00000135812 | 101.2489577 - 0.42315668 0.188993631 - 2.23899971 0.0251559340 0.105264184883452  | ENSMUST00000135812 | ENSMUSG00000033285  | Wdr3          |
| ENSMUST00000120374 | 484.9329663 - 0.547714320 0.244628635 - 2.23896241 0.0251583610 0.105267758369173 | ENSMUST00000120374 | ENSMUSG00000020389  | Cdk13         |
| ENSMUST00000099538 | 17.1754583 - 0.96813486 0.432418620 - 2.23888339 0.0251635040 0.10528692314015    | ENSMUST00000099538 | ENSMUSG00000009394  | Syn2          |
| ENSMUST0000099454  | 315.8098187 0.464072530 0.207296312 2.238691675 0.0251759840 0.10523823587682     | ENSMUST0000099454  | ENSMUSG00000099454  | Alb66181      |
| ENSMUST0000039538  | 4550.231275 0.319465613 0.142705044 2.238642753 0.0251791700 0.10533065222278     | ENSMUST0000039538  | ENSMUSG00000039538  | Arid4b        |
| ENSMUST00000150593 | 986.2594965 - 0.42444145 0.189620120 - 2.23837771 0.0251964340 0.10540699573424   | ENSMUST00000150593 | ENSMUSG000000150593 | Rab23         |
| ENSMUST00000162842 | 522.1956063 0.441390279 0.197199539 2.2382926430 0.0252019770 0.105417298016594   | ENSMUST00000162842 | ENSMUSG00000016194  | Hsd1l1b1      |
| ENSMUST00000106468 | 239.4480578 - 0.69597110 0.312567313 - 2.23821863 0.0252061490 0.10542387652887   | ENSMUST00000106468 | ENSMUSG00000044702  | Palb2         |
| ENSMUST00000138294 | 3298.1931880 0.278705353 0.245229872 2.2381839670 0.0252090600 0.10542387652887   | ENSMUST00000138294 | ENSMUSG00000038294  | Stx4a         |
| ENSMUST00000162371 | 702.9201618 0.34129410 0.20487520 - 2.23817729 0.0252094950 0.10542387652887      | ENSMUST00000162371 | ENSMUSG000000162371 | Tsen15        |
| ENSMUST00000146958 | 883.30485310 0.451787473 0.21854271 2.2381863440 0.0252089050 0.10542387652887    | ENSMUST00000146958 | ENSMUSG000000146958 | Safb2         |
| ENSMUST00000114459 | 61342.35174 - 0.43654003 0.195056830 - 2.23801462 0.0252201010 0.105453557781983  | ENSMUST00000114459 | ENSMUSG00000004980  | Hnrrpa2b1     |
| ENSMUST00000110536 | 4549.9736290 0.319235152 0.142680861 2.238077390 0.0252185940 0.105453557781983   | ENSMUST00000110536 | ENSMUSG00000010536  | Arid4b        |
| ENSMUST00000115492 | 183.5488262 - 0.90869914 0.406040102 - 2.23795417 0.0252240430 0.105457291658184  | ENSMUST00000115492 | ENSMUSG00000048216  | Gpr85         |
| ENSMUST0000032803  | 462.8937835 0.4320                                                                |                    |                     |               |

|                    |                                                                                 |                    |                     |               |
|--------------------|---------------------------------------------------------------------------------|--------------------|---------------------|---------------|
| ENSMUST00000167417 | 1241.747337 -0.36841971 -0.164801585 -2.23553498 0.0253822470 0.105876967476412 | ENSMUST00000167417 | ENSMUSG00000053819  | Camk2d        |
| ENSMUST00000143375 | 3203.832488 0.284022210 0.127053319 2.235456832 0.025387372 0.10588851959991    | ENSMUST00000143375 | ENSMUST00000022214  | Dcaf11        |
| ENSMUST00000135091 | 810.454813 -0.43672572 -0.195368270 -2.23539740 0.025391270 0.105897977428175   | ENSMUST00000135091 | ENSMUSG00000051319  | 1500011K16Rik |
| ENSMUST00000166054 | 204.1663876 0.704308261 0.315105236 2.235152515 0.0254073370 0.105958383493647  | NA                 | ENSMUST00000166454  | NA            |
| ENSMUST00000332124 | 2919.310256 -0.336942510 0.150756863 -2.23500609 0.0254169480 0.105985253851909 | ENSMUST00000332124 | ENSMUSG00000030045  | Mrp119        |
| ENSMUST00000137337 | 21.63596268 0.979968654 0.438458808 2.235030146 0.0254153690 0.105985253851909  | ENSMUST00000137337 | ENSMUST00000037336  | Mfsd2b        |
| ENSMUST00000144538 | 21.94892814 0.983059449 0.439856569 2.234954567 0.025420331 0.105988582771409   | ENSMUST00000144538 | ENSMUSG00000072244  | Trim6         |
| ENSMUST00000140727 | 16.7789514 -1.01369389 0.453565338 -2.23494569 0.025420914 0.105988582771409    | ENSMUST00000140727 | ENSMUST00000023927  | Satb1         |
| ENSMUST00000163486 | 1390.682893 0.389102090 0.174105333 2.234866001 0.025426110 0.106003795198728   | ENSMUST00000163486 | ENSMUSG00000022020  | Naa16         |
| ENSMUST00000130023 | 282.8961237 -0.56269782 0.251803164 -2.23467336 0.025438800 0.106049040097788   | ENSMUST00000130023 | ENSMUST00000040479  | Dgkz          |
| ENSMUST00000114132 | 17.92299929 -1.01454721 -0.454027694 -2.23454918 0.025446960 0.106077349384444  | ENSMUST00000114132 | ENSMUSG00000027520  | Zdfb2         |
| ENSMUST00000070879 | 3801.654892 -0.49549280 0.221744631 -2.23451994 0.025448881 0.106078339967284   | NA                 | ENSMUST00000070879  | NA            |
| ENSMUST00000102647 | 750.2262207 -0.65584567 0.293509269 -2.23449732 0.025450368 0.1061078339967284  | ENSMUST00000102647 | ENSMUSG00000076437  | 2700094K13Rik |
| ENSMUST00000114571 | 1336.726755 0.303761461 0.135949799 2.234364918 0.025459072 0.106110400105929   | ENSMUST00000114571 | ENSMUST00000042810  | Krba1         |
| ENSMUST00000172846 | 1231.585270 -0.44976487 0.201292434 -2.23438541 0.025457724 0.106110400105929   | ENSMUST00000172846 | ENSMUSG00000059714  | Flot1         |
| ENSMUST00000130828 | 371.8734986 0.584638764 0.261668180 2.234275349 0.025464961 0.106119334598388   | ENSMUST00000130828 | ENSMUST00000028689  | Ccdc113       |
| ENSMUST00000175764 | 2913.850264 0.365940684 0.163788234 2.234230595 0.025467904 0.10612499040169    | ENSMUST00000175764 | ENSMUSG00000046138  | 9930021103Rik |
| ENSMUST00000110603 | 550.0208863 -0.63533066 0.284389992 -2.23401203 0.025482281 0.1061782881241     | ENSMUST00000110603 | ENSMUST00000027242  | Wdr76         |
| ENSMUST00000130013 | 77.28360368 -0.94069293 0.421105005 -2.23386785 0.025491769 0.106204594970405   | ENSMUST00000130013 | ENSMUSG00000009108  | Gnat2         |
| ENSMUST00000102689 | 10444.56497 0.384365528 0.172062703 2.233868939 0.025491697 0.106204594970405   | ENSMUST00000102689 | ENSMUSG00000027109  | Mrps2         |
| ENSMUST00000146332 | 3504.046948 -0.32571706 0.145811217 -2.23382722 0.025494443 0.106209125874132   | ENSMUST00000146332 | ENSMUSG00000035772  | 281042815Rik  |
| ENSMUST00000138196 | 2025.155570 -0.371266520 0.166229819 -2.23345319 0.025519073 0.106305115389967  | ENSMUST00000138196 | ENSMUSG00000055883  | Mrp5p1        |
| ENSMUST00000136804 | 3746.591854 -0.33632635 0.150591898 -2.23336289 0.0255205202 0.10632078192019   | ENSMUST00000136804 | ENSMUSG00000030335  | Lsp1          |
| ENSMUST00000038946 | 5225.086784 0.574249244 0.257127628 2.23323771 0.025527600 0.10632078192019     | ENSMUST00000038946 | ENSMUST00000038946  | Klc2          |
| ENSMUST00000115563 | 2631.684961 0.461546230 0.206706775 -2.23333864 0.02553266200 0.10632078192019  | ENSMUST00000115563 | ENSMUSG00000024862  | NA            |
| ENSMUST00000084673 | 17.62563480 0.992767058 0.444557019 2.233160234 0.02553383790 0.10635905455506  | ENSMUST00000084673 | NA                  | NA            |
| ENSMUST00000165105 | 1094.883939 0.39357994 0.176246744 -2.23311895 0.025541101 0.1063624323247341   | ENSMUST00000165105 | ENSMUST00000025899  | Alkbh8        |
| ENSMUST00000126718 | 28.06508386 -0.87387648 0.391328909 -2.23309974 0.025542367 0.1063624323247341  | ENSMUST00000126718 | ENSMUSG00000048728  | Zfp454        |
| ENSMUST00000066003 | 10387.84188 0.385108541 0.172461340 2.233013728 0.025548039 0.10637942127661    | ENSMUST00000066003 | ENSMUST00000066003  | Sp3           |
| ENSMUST00000144226 | 3515.558624 0.343247403 0.153725406 2.232860590 0.025558138 0.10641852892833    | ENSMUST00000144226 | ENSMUSG00000029106  | Add1          |
| ENSMUST00000021201 | 11512.57121 -0.38589249 0.172836580 -2.23270152 0.025568634 0.106451928866      | ENSMUST00000021201 | ENSMUST00000020841  | Cpd           |
| ENSMUST00000029635 | 114.8548929 0.94835839 0.424788100 -2.23260819 0.025574793 0.106479048619027    | ENSMUST00000029635 | ENSMUSG00000028005  | Gucy1b3       |
| ENSMUST00000156225 | 17.631195211 0.11938740 0.453310743 2.232329048 0.025593220 0.106534418932906   | ENSMUST00000156225 | ENSMUST000000156225 | Laptm5        |
| ENSMUST00000156170 | 17.631195211 0.11938740 0.453310743 2.232329048 0.025593220 0.106534418932906   | ENSMUST00000156170 | ENSMUSG00000028581  | Laptm5        |
| ENSMUST00000106303 | 168.9398780 5.40664343 0.242206702 2.232243520 0.0255988720 0.10654678862836    | ENSMUST00000106303 | ENSMUST00000106303  | E430018J23Rik |
| ENSMUST00000152843 | 4912.943244 -0.43843459 0.196407739 -2.23226739 0.025597295 0.10654678862836    | ENSMUST00000152843 | ENSMUSG00000004667  | Polr2e        |
| ENSMUST00000062755 | 605.1374215 -0.42734997 0.191454682 -2.23212077 0.025606981 0.106571802353429   | ENSMUST00000062755 | ENSMUST00000062755  | Borc5         |
| ENSMUST00000143609 | 310.9596320 0.585126925 0.262178153 2.231791311 0.025628758 0.106655801158518   | ENSMUST00000143609 | ENSMUSG00000021830  | Tyndc16       |
| ENSMUST00000116287 | 93.6386867 0.693877626 0.310918327 2.231703844 0.025634543 0.106665005499407    | ENSMUST00000116287 | ENSMUST00000013628  | Plekhh1       |
| ENSMUST00000107044 | 93.6386867 0.693877626 0.310918327 2.231703844 0.025634543 0.106665005499407    | ENSMUST00000107044 | ENSMUSG00000030701  | Plekhh1       |
| ENSMUST00000101250 | 1889.5314290 3.51317087 0.15742844 2.231677932 0.02563256 0.106667103748295     | ENSMUST00000101250 | ENSMUST00000020359  | Phykpl        |
| ENSMUST00000124318 | 1019.869955 0.391239686 0.175315724 2.231621979 0.025639481 0.1066738882952     | ENSMUST00000124318 | ENSMUSG00000033581  | Igf2bp2       |
| ENSMUST00000173792 | 1006.759565 -0.42378431 0.189908952 -2.23151312 0.025647159 0.106699197527423   | ENSMUST00000173792 | ENSMUST00000173792  | Mrp918b       |
| ENSMUST00000113731 | 2620.869681 -0.45833170 0.205420755 -2.23118496 0.025668879 0.106782920401767   | ENSMUST00000113731 | NA                  | NA            |
| ENSMUST00000100899 | 15685.82283 -0.51332457 0.230083481 -2.23103618 0.025678732 0.10681268532513    | ENSMUST00000100899 | ENSMUST00000100899  | NA            |
| ENSMUST00000138030 | 2925.058182 -0.55269131 0.247732493 -2.23100047 0.025681097 0.106820467478419   | ENSMUST00000138030 | ENSMUST00000138030  | Stoml2        |
| ENSMUST00000153383 | 304.0260720 0.580280638 0.260104206 2.230954457 0.025684145 0.106832066960002   | ENSMUST00000153383 | ENSMUST00000015383  | Tyndc16       |
| ENSMUST00000147368 | 1419.180549 -0.56343060 0.252552682 -2.23094284 0.025684915 0.106832066960002   | ENSMUST00000147368 | ENSMUSG00000020929  | Eftud2        |
| ENSMUST00000173493 | 1226.396859 -0.45138578 0.202346257 -2.23075925 0.025697080 0.106837028828206   | ENSMUST00000173493 | ENSMUST000000173493 | Flot1         |
| ENSMUST00000173736 | 2803.504910 0.452197167 0.202705508 2.230808478 0.025693818 0.106837028828206   | ENSMUST00000173736 | ENSMUSG00000071454  | Dtnb          |
| ENSMUST00000102727 | 27973.71310 0.395145344 0.177133322 2.230779273 0.025695753 0.106837028828206   | ENSMUST00000102727 | ENSMUST00000018340  | Anxa6         |
| ENSMUST00000108883 | 27987.882230 0.395284443 0.177191571 2.230830966 0.025693237 0.106837028828206  | ENSMUST00000108883 | ENSMUSG00000018340  | Anxa6         |
| ENSMUST00000132345 | 2197.602096 -0.33290985 0.149236898 -2.23074762 0.025697851 0.106837028828206   | ENSMUST00000132345 | ENSMUST00000132345  | Nans          |
| ENSMUST00000045246 | 537.5210993 -0.547098340 0.245247947 -2.23079681 0.025695499 0.106837028828206  | ENSMUST00000045246 | ENSMUSG00000045246  | Pkn3          |
| ENSMUST0000097980  | 329.6164884 -0.49610381 0.222408376 -2.23059861 0.0257057780 0.10686707378217   | ENSMUST0000097980  | NA                  | NA            |
| ENSMUST00000137789 | 417.3767803 0.40705686 0.182779269 2.230590417 0.025700720 0.10686707378217     | ENSMUST00000137789 | ENSMUSG00000029456  | Acad10        |
| ENSMUST00000022952 | 85.46458520 -0.78156377 0.350403498 -2.23046794 0.025713639 0.10688406605096    | ENSMUST00000022952 | ENSMUST00000022952  | Os2r          |
| ENSMUST00000177320 | 1033.897015 0.327729187 0.146933682 2.230456510 0.025717151 0.10688406605096    | ENSMUST00000177320 | ENSMUSG00000032059  | Alg9          |
| ENSMUST00000156232 | 563.6302340 0.399892149 0.179286232 2.230467980 0.025716409 0.10688406605096    | ENSMUST00000156232 | ENSMUST00000156232  | Kiz           |
| ENSMUST00000144789 | 342.5656535 -0.58874113 0.263960528 -2.23041352 0.025720002 0.106889275294344   | ENSMUST00000144789 | ENSMUSG00000030979  | Uros          |
| ENSMUST00000173240 | 2805.327551 0.452591234 0.202945888 2.230107925 0.025740278 0.10696899057758    | ENSMUST00000173240 | ENSMUST00000173240  | Dtnb          |
| ENSMUST00000114437 | 5927.905649 -0.43468817 0.194931681 -2.22995139 0.025750669 0.10700343405525    | ENSMUST00000114437 | ENSMUSG00000032058  | Ppp2r1b       |
| ENSMUST00000149333 | 872.5398921 0.376406881 0.168800988 2.229885330 0.025750430 0.107014962342061   | ENSMUST00000149333 | ENSMUST00000149333  | Pigo          |
| ENSMUST00000028783 | 134.9079882 -0.89112665 0.399651200 -2.22976099 0.025763310 0.107042618193974   | ENSMUST00000028783 | ENSMUSG00000027313  | Spint1        |
| ENSMUST0000069912  | 38.56732231 0.975294850 0.437435184 2.229575682 0.025775625 0.10708718719967    | ENSMUST0000069912  | ENSMUST00000069912  | Rgs9bp        |
| ENSMUST00000140446 | 1628.179606 -0.31202523 0.140033943 -2.22949682 0.025780866 0.107089013734204   | ENSMUST00000140446 | ENSMUST00000140446  | Chchd3        |
| ENSMUST00000164011 | 1666.666064 -0.29783690 0.133588089 -2.22951689 0.025779532 0.107089013734204   | ENSMUST00000164011 | ENSMUST00000164011  | Naa35         |
| ENSMUST00000173186 | 2945.630620 -0.34377831 0.154192237 -2.22954361 0.025777756 0.107089013734204   | ENSMUST00000173186 | ENSMUSG00000017428  | Psmd11        |
| ENSMUST00000037739 | 7786.228415 -0.42507363 0.190662523 -2.22945562 0.025783604 0.10709693341868    | ENSMUST00000037739 | ENSMUST00000037739  | Gn13          |
| ENSMUST00000030945 | 2786.966839 0.346841311 0.155573107 2.229442587 0.025784471 0.10709693341868    | ENSMUST00000030945 | NA                  | NA            |
| ENSMUST00000363776 | 3862.680487 0.380445272 0.170649524 2.229395442 0.025787605 0.107097062306522   | ENSMUST00000363776 | ENSMUSG00000036376  | Trmb2         |
| ENSMUST00000123798 | 257.0714152 0.580933823 0.260586160 2.229334905 0.025791629 0.107106844600848   | ENSMUST00000123798 | ENSMUST00000123798  | Mical1        |
| ENSMUST00000174483 | 748.0416938 0.386599070 0.173416324 2.229311864 0.025793161 0.107106844600848   | ENSMUST00000174483 | ENSMUSG00000020661  | Dtnm3a        |
| ENSMUST00000150584 | 2415.838330 -0.33444483 0.150024302 -2.22927102 0.025795877 0.107114475161451   | ENSMUST00000150584 | ENSMUST00000150584  | Nans          |
| ENSMUST00000124985 | 935.1691523 0.424973929 0.190638765 2.22919875 0.025800683 0.1071247828424      | ENSMUST00000124985 | ENSMUSG00000025816  | Sec61a2       |
| ENSMUST00000167824 | 80.3366465 -1.00743441 0.451349856 -2.22908670 0.025808136 0.107143628470145    | ENSMUST00000167824 | ENSMUST00000167824  | Rab3c         |
| ENSMUST00000139266 | 723.6261006 -0.52145676 0.233933374 -2.22908237 0.025808420 0.107143628470145   | ENSMUST00000139266 | ENSMUSG00000006800  | Sulf2         |
| ENSMUST00000130415 | 171.2367639 0.589824223 0.264616059 2.228981204 0.025811550 0.107164923563128   | ENSMUST00000130415 | ENSMUST00000028476  | Reck          |
| ENSMUST00000154869 | 1464.544759 0.722874164 0.324318290 2.228903471 0.025820320 0.10717974771036    | ENSMUST00000154869 | ENSMUSG00000028167  | Bdh2          |
| ENSMUST00000137303 | 1311.764539 0.316524061 0.142013034 2.228838096 0.025824679 0.107184511477538   | ENSMUST00000137303 | ENSMUST00000137303  | Pgap2         |
| ENSMUST00000100211 | 9.842368140 0.987299687 0.424963311 2.228852056 0.025823750 0.107184511477538   | ENSMUST00000100211 | ENSMUSG00000022518  | 4930562C15Rik |
| ENSMUST00000177380 | 6514.594326 0.424308582 0.19037854 2.228760150 0.025829867 0.10719397512147     | ENSMUST00000177380 | ENSMUST00000032336  | Nptn          |
| ENSMUST0000        |                                                                                 |                    |                     |               |

|                     |                                                                                  |                     |                     |               |
|---------------------|----------------------------------------------------------------------------------|---------------------|---------------------|---------------|
| ENSMUST00000167608  | 60.29023960 0.974413562 0.437773346 2.225840309 0.026024570 0.107761456658222    | ENSMUST00000167608  | ENSMUSG00000079652  | Fam71f2       |
| ENSMUST00000132998  | 686.6672246 0.389688147 0.175081815 2.225748832 0.026031009 0.107780170527366    | ENSMUST00000132998  | ENSMUST00000027829  | Ccn1l         |
| ENSMUST00000142865  | 30.38480180 984232600 0.442135802 2.225695101 0.026034611 0.10778841139845       | ENSMUST00000142865  | ENSMUSG00000089736  | Tgfbtr3l      |
| ENSMUST00000113727  | 2626.346975 -0.45818265 0.205864477 -2.22565183 0.0260375110 0.107793749641686   | ENSMUST00000113727  | ENSMUST00000001482  | Klc2          |
| ENSMUST00000142821  | 129.8061395 -0.71939940 0.323272734 -2.22536367 0.0260568340 0.107856653776024   | ENSMUST00000142821  | ENSMUSG00000020083  | 2010107G23Rik |
| ENSMUST00000024802  | 2242.852595 -0.55734451 0.250449892 -2.22537333 0.0260561860 0.107856653776024   | ENSMUST00000024802  | ENSMUST00000000284  | Ppil1         |
| ENSMUST00000128902  | 371.4454351 -0.52201618 0.234576784 -2.22535313 0.0260575400 0.107856653776024   | ENSMUST00000128902  | ENSMUSG00000040479  | Dgkz          |
| ENSMUST00000142781  | 2313.183459 -0.50303052 0.226053938 -2.22526766 0.0260632740 0.107873714790082   | ENSMUST00000142781  | ENSMUST00000028455  | Stoml2        |
| ENSMUST00000202075  | 12289.16365 -0.30367158 0.136467801 -2.22522512 0.0260661280 0.107878855568392   | ENSMUST00000202075  | ENSMUSG00000020483  | Dynl12        |
| ENSMUST00000152942  | 2074.514278 -0.44294094 0.199060491 -2.22515751 0.0260706650 0.10789058881732    | ENSMUST00000152942  | ENSMUST00000015294  | 1110008F13Rik |
| ENSMUST0000030169   | 5194.189861 -0.49600162 0.222912901 -2.22509160 0.0260750890 0.107902592630226   | ENSMUST0000030169   | ENSMUST00000027637  | Stoml2        |
| ENSMUST00000143521  | 9452.216948 -0.44798797 0.201339665 -2.22503586 0.0260788300 0.107911400914269   | ENSMUST00000143521  | ENSMUST00000014352  | G6pdx         |
| ENSMUST00000175945  | 11367.67883 0.381380137 0.17143129 2.224917884 0.026086751 0.107937501703318     | ENSMUST00000175945  | ENSMUSG00000032336  | Nptrn         |
| ENSMUST00000025798  | 2629.304141 -0.45824050 0.205967201 -2.22482271 0.026093141 0.107954774653678    | ENSMUST00000025798  | ENSMUST00000025798  | Klc2          |
| ENSMUST00000172913  | 146.3443686 0.628739922 0.282604168 2.224807670 0.026094152 0.107954774653678    | ENSMUST00000172913  | ENSMUST00000020661  | Dnmt3a        |
| ENSMUST00000138199  | 2456.355979 0.327446582 0.147188030 2.224682131 0.0261025840 0.10798298472609    | ENSMUST00000138199  | ENSMUST00000138199  | Neifb         |
| ENSMUST0000023235   | 14479.82197 -0.29426995 0.132281767 -2.22456924 0.0261101690 0.108007683497638   | ENSMUST0000023235   | ENSMUST00000023235  | Eef1d         |
| ENSMUST00000060474  | 778.5236563 -0.47456341 0.213335470 -2.22449371 0.0261152450 0.108022003181333   | ENSMUST00000060474  | ENSMUST000000060474 | sept-06       |
| ENSMUST00000151063  | 5376.737544 0.451759527 0.203090207 2.224427914 0.0261196670 0.108028647303828   | ENSMUST00000151063  | ENSMUST000000151063 | Rnf181        |
| ENSMUST00000100687  | 11.70254391 1.009876510 0.453995065 2.224421777 0.0261200790 0.108028647303828   | ENSMUST00000100687  | ENSMUST000000100687 | Gm16439       |
| ENSMUST00000170354  | 282.1152128 -0.72091250 0.324132354 -2.22413002 0.0261396970 0.108103100742347   | ENSMUST00000170354  | ENSMUST000000170354 | Adsl          |
| ENSMUST000000055730 | 21.68794415 -0.932579300 0.419343082 -2.22390529 0.0261548610 0.108158944545377  | ENSMUST000000055730 | NA                  | NA            |
| ENSMUST00000111345  | 13.1641858 1.006075282 0.452403720 2.223843962 0.0261589440 0.108166747204818    | ENSMUST00000111345  | NA                  | sept-03       |
| ENSMUST00000116423  | 298.0012377 0.706562020 0.31771546 -2.22380520 0.0261615520 0.108166747204818    | ENSMUST00000116423  | ENSMUSG00000022456  | NA            |
| ENSMUST00000106962  | 6953.608252 -0.34407489 0.154722944 -2.22381299 0.0261610280 0.108166747204818   | ENSMUST00000106962  | ENSMUST000000106962 | Cdc27         |
| ENSMUST00000145673  | 732.46600780 3.80741135 0.171214958 2.223760930 0.0261645330 0.108172384789116   | ENSMUST00000145673  | ENSMUST000000145673 | Stk36         |
| ENSMUST00000115543  | 2106.3057230 8.16419265 0.367159195 2.223611107 0.0261746200 0.108207404655607   | ENSMUST00000115543  | ENSMUST00000015543  | Srxp          |
| ENSMUST00000127902  | 3006.326093 -0.35772103 0.160886469 -2.22343766 0.0261863020 0.108249010530965   | ENSMUST00000127902  | ENSMUST000000127902 | Akt1          |
| ENSMUST00000172083  | 4051.090324 -0.32579534 0.146541600 -2.22322770 0.0262004490 0.108300802452487   | ENSMUST00000172083  | ENSMUST000000172083 | Mtdh          |
| ENSMUST00000150516  | 1036.964844 -0.60936938 0.274107252 -2.22310564 0.0262086760 0.108328118363507   | ENSMUST00000150516  | ENSMUSG00000034187  | Nsf           |
| ENSMUST00000168433  | 2838.4756740 4.55024592 0.204693626 2.222954379 0.0262188760 0.1083635828104     | ENSMUST00000168433  | NA                  | NA            |
| ENSMUST00000140963  | 1336.097825 0.436040060 0.196156441 2.222919922 0.026221200 0.108366328434296    | ENSMUST00000140963  | ENSMUST000000140963 | Stk11np       |
| ENSMUST00000044634  | 32.59943541 -0.88028366 0.396007491 -2.22289650 0.026222700 0.108366328434296    | ENSMUST00000044634  | ENSMUST000000044634 | Slc25a21      |
| ENSMUST00000082283  | 1796.809513 -0.35635753 0.160319089 -2.22280165 0.026229170 0.108375268231939    | ENSMUST00000082283  | ENSMUST00000082283  | Naa38         |
| ENSMUST00000108039  | 2816.245496 -0.43234876 0.194509139 -2.22276840 0.0262314200 0.108375268231939   | ENSMUST00000108039  | ENSMUST000000108039 | Intc2         |
| ENSMUST00000127087  | 2629.868430 4.31711653 0.194218523 2.222814005 0.0262283440 0.108375268231939    | ENSMUST00000127087  | ENSMUST000000127087 | P3h1          |
| ENSMUST00000152148  | 610.8492369 0.422755684 0.190191636 2.222787982 0.0262300990 0.108375268231939   | ENSMUST00000152148  | ENSMUST000000152148 | Mga           |
| ENSMUST00000006969  | 29.44393647 0.998941869 0.449441995 2.222626902 0.0262409680 0.10840802189439    | ENSMUST00000006969  | ENSMUST00000006969  | Krt23         |
| ENSMUST00000020346  | 1140.548075 0.323313983 0.145478477 2.222417966 0.0262550720 0.108459591620671   | ENSMUST00000020346  | ENSMUST00000020346  | Thap2         |
| ENSMUST00000145556  | 175.4923362 -0.75488260 0.339689744 -2.22227081 0.0262650090 0.108493423014029   | ENSMUST00000145556  | ENSMUST000000145556 | Cdc25b        |
| ENSMUST00000154536  | 919.80646240 3.17011470 0.142653830 2.222429560 0.0262668900 0.108495019092403   | ENSMUST00000154536  | ENSMUST000000154536 | Krba1         |
| ENSMUST00000131532  | 9.771342172 -0.96666756 0.4350011779 -2.22216410 0.0262722170 0.108510321383987  | ENSMUST00000131532  | ENSMUST000000131532 | Kif24         |
| ENSMUST00000068330  | 857.9726582 -0.38213209 0.171984393 -2.22189981 0.0262900760 0.108574658468438   | ENSMUST00000068330  | NA                  | NA            |
| ENSMUST00000164551  | 195.80310980 5.40513137 0.243267764 2.221885578 0.0262910390 0.108574658468438   | ENSMUST00000164551  | ENSMUSG00000034800  | Zfp661        |
| ENSMUST00000173470  | 124.1807786 -0.70751244 0.318446710 -2.22176089 0.0262994680 0.108602767392105   | ENSMUST00000173470  | ENSMUST000000173470 | Uggt2         |
| ENSMUST00000134697  | 5491.797697 -0.41297523 0.185902075 -2.22146649 0.026319381 0.108678290042176    | ENSMUST00000134697  | ENSMUST000000134697 | Drp1l         |
| ENSMUST00000110879  | 374.0117414 -0.45373301 0.204262516 -2.22132296 0.0263290940 0.108706878144992   | ENSMUST00000110879  | ENSMUST000000110879 | Mcf2l         |
| ENSMUST00000112043  | 118.2617490 6.38863657 0.287605908 2.221361780 0.0263295530 0.108706878144992    | ENSMUST00000112043  | ENSMUSG00000041762  | Gpr155        |
| ENSMUST00000154798  | 178.5926450 0.911941391 0.410554392 2.221243781 0.0263344540 0.108720403077614   | ENSMUST00000154798  | ENSMUST000000154798 | 2810433D01Rik |
| ENSMUST00000066388  | 699.2893439 0.739169541 0.332785981 2.221155885 0.0263404040 0.108731553738073   | ENSMUST00000066388  | NA                  | NA            |
| ENSMUST00000082122  | 2597.776143 -0.572799860 0.257883534 -2.22115718 0.0263403100 0.108731553738073  | ENSMUST00000082122  | ENSMUSG00000027203  | Dut           |
| ENSMUST00000159979  | 4746.579037 0.374494446 0.168608977 2.221082482 0.0263453750 0.108743573407889   | ENSMUST00000159979  | NA                  | NA            |
| ENSMUST00000165907  | 31.81242242 0.861570791 0.387908879 2.221064887 0.0263465560 0.108743573407889   | ENSMUST00000165907  | ENSMUST000000165907 | Catsperg1     |
| ENSMUST00000054556  | 3425.166773 -0.43686241 0.196695361 -2.22101027 0.0263502650 0.108752130630169   | ENSMUST00000054556  | ENSMUSG00000043866  | Taf10         |
| ENSMUST00000164607  | 2853.883460 4.53810593 0.204329396 2.220975549 0.0263526170 0.10875513181872     | ENSMUST00000164607  | ENSMUST000000164607 | Dtnb          |
| ENSMUST00000105240  | 821.9668085 -0.69788495 0.314240245 -2.22086434 0.026360151 0.108779513571291    | ENSMUST00000105240  | ENSMUST000000105240 | Timeless      |
| ENSMUST00000144690  | 2218.732192 0.330814227 0.148963463 2.220774275 0.0263662530 0.108797987767251   | ENSMUST00000144690  | NA                  | NA            |
| ENSMUST0000072530   | 3255.273849 0.281853451 0.1269263192 2.2206068220 0.0263776030 0.108838109533464 | ENSMUST0000072530   | ENSMUSG00000022214  | Dcaf11        |
| ENSMUST00000157078  | 348.0507939 -0.59307405 0.267081957 -2.22056953 0.026380131 0.10884182808123     | ENSMUST00000157078  | ENSMUST000000157078 | Shkbp1        |
| ENSMUST00000124803  | 33.99198153 -0.99725722 0.449118557 -2.22047654 0.0263864360 0.108861129855035   | ENSMUST00000124803  | ENSMUST000000124803 | Ndst3         |
| ENSMUST00000152935  | 837.3369180 0.410733522 0.184992104 2.220275961 0.0264000400 0.108910543309628   | ENSMUST00000152935  | ENSMUST000000152935 | Suv420h1      |
| ENSMUST00000110867  | 378.5242915 -0.45231197 0.203723821 -2.22022133 0.0264037460 0.108919117812851   | ENSMUST00000110867  | ENSMUST000000110867 | Mcf2l         |
| ENSMUST00000154460  | 15788.12583 -0.32336821 0.145651986 -2.22014286 0.0264090710 0.108943366719274   | ENSMUST00000154460  | ENSMUST000000154460 | Ap3m1         |
| ENSMUST00000105967  | 4638.334308 0.561696075 0.253019019 2.219975699 0.0264201370 0.108967733624964   | ENSMUST00000105967  | ENSMUST000000105967 | Lsp1          |
| ENSMUST00000399343  | 2572.228567 -0.37620611 0.169463773 -2.21997958 0.0264201530 0.108967733624964   | ENSMUST00000399343  | ENSMUST00000039943  | Cbx1          |
| ENSMUST00000133321  | 343.6251255 0.53299403 0.240101891 2.219888403 0.0264263430 0.108985460472813    | ENSMUST00000133321  | ENSMUST000000133321 | Nr2c2         |
| ENSMUST00000108306  | 56.54216235 -0.99275070 0.447218664 -2.21983290 0.0264301120 0.108974284070239   | ENSMUST00000108306  | ENSMUST000000108306 | Rad54b        |
| ENSMUST00000107921  | 14.46099644 0.985601154 0.444053360 2.219555669 0.0264489440 0.109045065297051   | ENSMUST00000107921  | NA                  | NA            |
| ENSMUST0000035323   | 14.46099644 0.985601154 0.444053360 2.219555669 0.0264489440 0.109045065297051   | ENSMUST0000035323   | ENSMUST00000035323  | Spib          |
| ENSMUST00000098483  | 4692.269837 0.563259353 0.2537651332 2.219608919 0.0264453260 0.109045065297051  | ENSMUST00000098483  | ENSMUST000000098483 | Spib          |
| ENSMUST00000149521  | 1201.555194 0.312679383 0.140890072 2.2193145170 0.0264653430 0.109072320130396  | ENSMUST00000149521  | ENSMUST000000149521 | Lsp1          |
| ENSMUST00000331815  | 75.01543759 0.950002653 0.428050095 2.219372600 0.0264613860 0.109072320130396   | ENSMUST00000331815  | ENSMUST000000331815 | Krba1         |
| ENSMUST00000085819  | 11977.47328 -0.29371911 0.132346385 -2.21932099 0.0264648940 0.109072320130396   | ENSMUST00000085819  | ENSMUST000000085819 | Catsperg1     |
| ENSMUST00000144614  | 1298.444604 0.403023486 0.1811462712 2.219330724 0.0264642320 0.109072320130396  | ENSMUST00000144614  | ENSMUST000000144614 | Eef1d         |
| ENSMUST00000159033  | 2855.913110 0.452309296 0.203797719 2.2194033110 0.0264599100 0.109072320130396  | ENSMUST00000159033  | ENSMUST000000159033 | Slc12         |
| ENSMUST00000174663  | 20025.080520 3.90823224 0.176098784 2.219430837 0.0264635450 0.109072320130396   | ENSMUST00000174663  | ENSMUST000000174663 | Dtnb          |
| ENSMUST00000148298  | 5033.5631220 2.81207870 0.126714444 2.2192250470 0.0264714170 0.10909672413522   | ENSMUST00000148298  | ENSMUST000000148298 | Ana6          |
| ENSMUST00000152310  | 2689.813506 0.336940467 0.151839249 2.219060416 0.0264826140 0.109130094276749   | ENSMUST00000152310  | ENSMUSG000000152310 | Stv4a         |
| ENSMUST00000126046  | 5477.454669 0.306016455 0.137905361 2.219032324 0.0264845250 0.109131248481825   | ENSMUST00000126046  | ENSMUST000000126046 | Ube2g1        |
| ENSMUST00000166922  | 2747.556743 0.428531763 0.193126255 2.2189202740 0.0264921480 0.109155939986035  | ENSMUST00000166922  | NA                  | NA            |
| ENSMUST00000146893  | 99.64802167 -0.57930617 0.261004296 -2.21876225 0.0265029020 0.109186804192183   | ENSMUST00000146893  | ENSMUST000000146893 | Snx1          |
| ENSMUST00000707552  | 16.00027618 98.1410394 0.442318842 2.218784955 0.0265013580 0.109186804192183    |                     |                     |               |

|                     |                                                                              |                     |                     |                    |
|---------------------|------------------------------------------------------------------------------|---------------------|---------------------|--------------------|
| ENSMUST00000121033  | 1352.429506 -0.35499597-0.160198463-2.21597614-0.0266931350.109727332646092  | ENSMUST00000121033  | ENSMUSG000000040167 | Ikzf5              |
| ENSMUST00000165526  | 101.36146870.954423545.0.430708316-2.2159394390.0266956490.109730927867523   | ENSMUST00000165526  | ENSMUST00000021974  | Fgf9               |
| ENSMUST00000152210  | 2466.0630500.4291761840.1936802702.2159003730.0266983250.109735186723368     | ENSMUST00000152210  | ENSMUSG00000014353  | Tmem87b            |
| ENSMUST00000149744  | 1110.7992400.5798715450.261696335-2.2158183590.0267039440.109847799125766    | ENSMUST00000149744  | ENSMUST00000014974  | Col18a1            |
| ENSMUST00000174428  | 33.52946215 -0.884490700.399169148-2.21582933-0.0267031920.109744799125766   | ENSMUST00000174428  | ENSMUSG00000027684  | Mecom              |
| ENSMUST00000223432  | 1355.970050 -0.44882634-0.202576120-2.21559354-0.0267193510.1098047131447035 | ENSMUST00000223432  | ENSMUST00000002751  | Nit2               |
| ENSMUST00000175900  | 121.5295018 -0.886021650.399909094-2.21555766-0.0267218110.1098047131447035  | ENSMUST00000175900  | ENSMUSG00000031133  | Arhgef6            |
| ENSMUST00000069958  | 1684.650812 -0.411066750.185544286-2.21546436-0.0267282070.109824277267451   | ENSMUST00000069958  | ENSMUST00000021360  | Gcnt2              |
| ENSMUST00000129952  | 113.6685357 -0.773199520.349015113-2.21537548-0.0267343020.109842576234788   | ENSMUST00000129952  | ENSMUSG00000000884  | Gnb1l              |
| ENSMUST00000010666  | 859.6990200-0.43748711-0.197480524-2.21534307-0.0267365250.109844966373364   | ENSMUST00000010666  | NA                  | NA                 |
| ENSMUST00000171603  | 1536.1838070.3613101430.1631020932.2152391560.0267436530.109860761792239     | ENSMUST00000171603  | NA                  | NA                 |
| ENSMUST00000164711  | 890.6535754 -0.352185190.158982591-2.21524374-0.0267433380.109860761792239   | ENSMUST00000164711  | ENSMUST00000164711  | NA                 |
| ENSMUST00000153779  | 1994.759205 -0.39229294-0.177095509-2.21514900-0.0267498380.109879423947518  | ENSMUST00000153779  | ENSMUSG00000027671  | Actl6a             |
| ENSMUST00000131526  | 1965.641506 -0.34093532-0.153919434-2.21502452-0.0267583810.109907768796665  | ENSMUST00000131526  | ENSMUST000000131526 | P4k42b             |
| ENSMUST00000145730  | 356.2639635 -0.46866576-0.211591805-2.21495232-0.0267633360.109921376251661  | ENSMUST00000145730  | ENSMUSG000000004865 | Srpk1              |
| ENSMUST00000142562  | 3349.4851460.3383753790.1527801822.2147858090.0267747690.109961583175704     | ENSMUST00000142562  | ENSMUST000000142562 | Ppp1cc             |
| ENSMUST00000071728  | 605.9355538 -0.51065068-0.230588350-2.21455544-0.0267905930.110019816737979  | ENSMUST00000071728  | ENSMUSG000000029822 | Osbpl3             |
| ENSMUST00000032388  | 2138.094307 -0.423638880-0.191320130-2.21429331-0.0268068080.110087041979797 | ENSMUST00000032388  | ENSMUST00000032388  | Rassf8             |
| ENSMUST00000113438  | 5398.0232970.5228590970.2361387142.2142219580.0268135140.110092008069118     | ENSMUST00000113438  | ENSMUST000000113438 | Adamt9             |
| ENSMUST00000123644  | 17.65552846-0.997709596-0.450596348-2.2141981410.0268151510.110092008069118  | ENSMUST00000123644  | ENSMUST000000123644 | Gm15510            |
| ENSMUST00000164578  | 2840.8046180.4535755800.2048446992-2.2142413430.0268121810.110092008069118   | ENSMUST00000164578  | ENSMUST00000164578  | Dtnb               |
| ENSMUST00000145588  | 3392.505691-0.3208880400.1449240872-2.2141800130.0268163980.110092008069118  | ENSMUST00000145588  | ENSMUST000000145588 | Xbp1               |
| ENSMUST00000021610  | 13.96161516-1.001914320.452516243-2.21409581-0.0268221880.110102270224179    | ENSMUST00000021610  | ENSMUST00000021610  | Chga               |
| ENSMUST00000132295  | 420.25445050.8354674140.3773396142-2.21409494020.0268219410.110102270224179  | ENSMUST00000132295  | ENSMUST000000132295 | Soc3               |
| ENSMUST00000168109  | 39200.349990.5360637030.2421375262.2138811430.0268369560.110156132952465     | ENSMUST00000168109  | ENSMUST00000168109  | NA                 |
| ENSMUST00000080498  | 331.28160210.4161372310.1879782132-2.2137524560.0268458120.11017896746637    | ENSMUST00000080498  | NA                  | NA                 |
| ENSMUST0000018212   | 3580.421074-0.39926081-0.180353088-2.21377308-0.0268443920.11017896746637    | ENSMUST0000018212   | ENSMUSG00000018068  | Ints2              |
| ENSMUST00000112015  | 6025.706402-0.32309376-0.145955771-2.21364157-0.0268534450.110183263670233   | ENSMUST00000112015  | NA                  | NA                 |
| ENSMUST00000128858  | 31.689197970.8344301330.3769421772-2.2136820530.0268506580.110183263670233   | ENSMUST00000128858  | ENSMUST000000128858 | Gm14379            |
| ENSMUST00000133158  | 783.70146510.4156122190.187744845-2.2137077480.0268488890.110183263670233    | ENSMUST00000133158  | ENSMUST000000133158 | Ttc38              |
| ENSMUST00000153967  | 3374.089072-0.323947500.146339890-2.21366508-0.0268518260.110183263670233    | ENSMUST00000153967  | ENSMUST000000153967 | Emc4               |
| ENSMUST000000807231 | 8.546938388-0.948792750.428217613-2.21357722-0.0268578750.110192346503188    | ENSMUST000000807231 | ENSMUST000000807231 | Kctd8              |
| ENSMUST00000152969  | 4059.935780-0.38706060-0.174858746-2.21356158-0.0268589520.110192346503188   | ENSMUST00000152969  | ENSMUST000000152969 | Acly               |
| ENSMUST00000060450  | 129.9583252-0.714679310.322874593-2.21348886-0.0268639600.110206136139722    | ENSMUST00000060450  | ENSMUST00000060450  | 2010107523Rik      |
| ENSMUST00000128705  | 389.553341-0.42332144-0.191250211-2.213443030.0268671160.110212327318307     | ENSMUST00000128705  | ENSMUST000000128705 | Lrrc75a            |
| ENSMUST00000122087  | 1450.992158-0.35887995-0.162140447-2.2138944-0.0268708070.110220711958733    | ENSMUST00000122087  | ENSMUST00000122087  | Gtf2a2             |
| ENSMUST00000146022  | 2069.760750-0.59950352-0.270856152-2.213364980.0268724920.110220866864676    | ENSMUST00000146022  | ENSMUST00000146022  | Ndufa1             |
| ENSMUST00000168540  | 2842.6566240.3850403490.1739729992-2.2132190020.0268825500.110255364237288   | ENSMUST00000168540  | NA                  | NA                 |
| ENSMUST00000103075  | 6510.358972-0.54302961-0.245361818-2.21317895-0.0268853100.110259925400403   | ENSMUST00000103075  | ENSMUST000000103075 | Nsf                |
| ENSMUST00000148674  | 307.29380410.4661439440.2106275812-2.2131191960.0268894280.110270058007824   | ENSMUST00000148674  | ENSMUST000000148674 | Zmynd8             |
| ENSMUST00000160062  | 315.49950260-0.4729901280.213734424-2.2129805660.0268898950.110302488434607  | ENSMUST00000160062  | ENSMUST000000160062 | Rblcc1             |
| ENSMUST00000143371  | 2361.997796-0.505331600-0.228359807-2.21287456-0.0269062950.11031894182179   | ENSMUST00000143371  | ENSMUST000000143371 | Stoml2             |
| ENSMUST00000176124  | 208.7594561-0.736981700.333040262-2.21289071-0.0269051800.11031894182179     | ENSMUST00000176124  | ENSMUST000000176124 | Apitd1             |
| ENSMUST00000114572  | 1342.4356280.3006726690.1358797752-2.2127845680.0269125010.11033762975488    | ENSMUST00000114572  | ENSMUST000000114572 | Krba1              |
| ENSMUST00000172354  | 18.082121090.9793001660.4425768402-2.212734770.0269167150.110348145794676    | ENSMUST00000172354  | NA                  | NA                 |
| ENSMUST00000138981  | 2409.793767-0.474706170.214540492-2.21266470-0.0269207700.110358006934358    | ENSMUST00000138981  | ENSMUST000000138981 | Test1              |
| ENSMUST00000096275  | 2049.8217240.3697503210.1671154682-2.2125439700.0269291010.110385397596883   | ENSMUST00000096275  | ENSMUST00000096275  | lqsec2             |
| ENSMUST00000161122  | 3657.287669-0.35402067-0.160010686-2.21248142-0.0269334180.110394730488266   | ENSMUST00000161122  | ENSMUST000000161122 | Mob4               |
| ENSMUST00000130152  | 1819.9216920.3595520620.162513862-2.214392780.0269363270.110394730488266     | ENSMUST00000130152  | ENSMUST000000130152 | Aff4               |
| ENSMUST00000108480  | 1621.273602-0.548559530-0.247941005-2.21245992-0.0269349010.110394730488266  | ENSMUST00000108480  | ENSMUST000000108480 | Emc6               |
| ENSMUST00000168253  | 226.0768641-0.680793890.307719646-2.21238357-0.0269401720.110403727335209    | ENSMUST00000168253  | NA                  | NA                 |
| ENSMUST00000169991  | 1065.940254-0.46254750-0.209081156-2.21228690-0.0269468470.11042431899243    | ENSMUST00000169991  | ENSMUSG00000024858  | Adrbk1             |
| ENSMUST00000172820  | 1097.510332-0.388110230.175450185-2.21208223-0.0269609830.110475481888755    | ENSMUST00000172820  | ENSMUST000000172820 | Ddt                |
| ENSMUST00000173081  | 40.592668020.9745524430.440579344-2.2119794220.0269608060.1104937190698      | ENSMUST00000173081  | ENSMUSG00000047146  | Tet1               |
| ENSMUST00000127437  | 2641.675489-0.31862537-0.144054972-2.21197001-0.0269687360.1104937190698     | ENSMUST00000127437  | ENSMUST000000127437 | ENSMUSG00000018565 |
| ENSMUST00000132761  | 3641.953756-0.331777640.149998930-2.21186676-0.0269758720.110516188712435    | ENSMUST00000132761  | NA                  | NA                 |
| ENSMUST00000141301  | 2057.842448-0.3708378600.1676722162-2.2116834120.0269885470.110561347706852  | ENSMUST00000141301  | ENSMUST000000141301 | Oser1              |
| ENSMUST00000057427  | 316.7147538-0.539014710.243727187-2.21154940-0.0269978140.110579258059798    | ENSMUST00000057427  | ENSMUST00000057427  | Ipo11              |
| ENSMUST00000167994  | 259.56870410.463292957-0.2094880380.2115485040.0269978760.110579258059798    | ENSMUST00000167994  | ENSMUST000000167994 | Prdm9              |
| ENSMUST00000045467  | 460.9906885-0.474613120.214605157-2.21156441-0.0269967760.110579258059798    | ENSMUST00000045467  | ENSMUST00000045467  | H2-Ke6             |
| ENSMUST00000174533  | 4698.061378-0.37562897-0.169859975-2.21104367-0.0270078950.110613523677963   | ENSMUST00000174533  | ENSMUST000000174533 | Paip1              |
| ENSMUST00000136568  | 490.3876070-0.599190160-0.270975062-2.21123729-0.0270194080.110653905183343  | ENSMUST00000136568  | ENSMUST000000136568 | Mre11a             |
| ENSMUST00000759882  | 65.059072520.8608729560.3893410132-2.2111026740.0270287270.11068295162256    | ENSMUST00000759882  | ENSMUST00000075982  | Saa2               |
| ENSMUST00000170582  | 134.25686090.8048399310.3640143222-2.2110117130.0270350250.110704311959639   | ENSMUST00000170582  | ENSMUST000000170582 | Slc6a12            |
| ENSMUST00000147898  | 11976.56255-0.301145830.136215856-2.21079866-0.0270498200.110759584661665    | ENSMUST00000147898  | ENSMUST000000147898 | Psmd11             |
| ENSMUST00000062519  | 3706.1869500.5585313830.2526462922-2.2107246390.0270549110.110772182255976   | ENSMUST00000062519  | ENSMUST00000062519  | Crebfr             |
| ENSMUST00000048915  | 5801.587290-0.46310471-0.209494856-2.21057795-0.0270650570.110807024700948   | ENSMUST00000048915  | ENSMUST00000048915  | Rbm8a              |
| ENSMUST00000129179  | 127.0743842-0.74881259-0.338749813-2.21051809-0.0270692260.110817231561023   | ENSMUST00000129179  | ENSMUST000000129179 | Ranbp17            |
| ENSMUST00000138117  | 2758.8738580.4614736270.2087696322-2.2104442190.0270743470.11083111673581    | ENSMUST00000138117  | ENSMUST000000138117 | Itsn1              |
| ENSMUST00000172730  | 1297.8654240.3813502290.1725237682-2.2104213960.0270759300.11083111673581    | ENSMUST00000172730  | ENSMUST000000172730 | Dhx16              |
| ENSMUST00000066748  | 4069.579719-0.37495072-0.169639975-2.21027339-0.0270861940.11086313971969276 | ENSMUST00000066748  | ENSMUST00000066748  | Padp5              |
| ENSMUST00000147468  | 5418.276103-0.296676140.0.174226809-2.21025999-0.0270871230.110863731969276  | ENSMUST00000147468  | ENSMUST000000147468 | Mgat4b             |
| ENSMUST00000026613  | 5036.583548-0.396375830.179339870-2.21019361-0.0270917280.110875437109393    | ENSMUST00000026613  | ENSMUST00000026613  | Gusb               |
| ENSMUST00000129233  | 6408.0842890.4477662340.2026092282-2.2099992050.0271052170.110923858869006   | ENSMUST00000129233  | ENSMUST000000129233 | Rnf181             |
| ENSMUST00000155690  | 19.35643952-1.001055830.453033060-2.20967501-0.0271277400.111009178247674    | ENSMUST00000155690  | ENSMUST000000155690 | Ddc                |
| ENSMUST00000166208  | 11548.108700-0.337630230.152799218-2.20963322-0.0271306270.111014266130916   | ENSMUST00000166208  | ENSMUST000000166208 | NA                 |
| ENSMUST00000118952  | 4127.262270-0.37378915-0.169178352-2.209438430.0271441600.11106284959007     | ENSMUST00000118952  | ENSMUST000000118952 | Padp5              |
| ENSMUST00000161668  | 24.01293175-1.0003240010.452755412-2.209413710.0271458770.1110630860461      | ENSMUST00000161668  | ENSMUST000000161668 | Lmo7               |
| ENSMUST00000066784  | 702.3536320-0.538679140.243881870-2.209347830.02715504560.111075029363877    | ENSMUST00000066784  | NA                  | NA                 |
| ENSMUST00000127311  | 1500.320858-0.50940383-0.23881364-2.20921510-0.0271567800.11097408815517     | ENSMUST00000127311  | ENSMUST000000127311 | Ppp5c              |
| ENSMUST00000135255  | 22.160014300.9411432930.4260159942-2.2091736100.0271625670.11097408815517    | ENSMUST00000135255  | ENSMUST000000135255 | Plekhh1            |
| ENSMUST00000161838  | 2222.519402-0.426570830.193088823-2.209194860.0271610900.11097408815517      | ENSMUST00000161838  | ENSMUST000000161838 | Ipo9               |
| ENSMUST00000066048  | 117.26736390.7453642490.3373932172-2.2091856340.0271617310.11097408815517    | ENSMUST00000066048  | NA                  | NA                 |
| ENSMUST00000033018  | 8728.751387-0.306963630.138952002-2.20913430-0.0271653000.11101796404567     | ENSMUST00000033018  | EN                  |                    |

|                                                                                |                                                                                |                     |                      |               |
|--------------------------------------------------------------------------------|--------------------------------------------------------------------------------|---------------------|----------------------|---------------|
| ENSMUST00000121716                                                             | 306.5775003 0.551772165 0.250126288 2.205974000 0.0273857990.11176454539661    | ENSMUST00000121716  | ENSMUSG000000021062  | Tab15         |
| ENSMUST00000160107                                                             | 1076.3077810 0.426115115 0.193171801 2.205886745 0.0273919300.111782729917311  | ENSMUST00000160107  | ENSMUST000000025184  | R3hcc1l       |
| ENSMUST00000123766                                                             | 2766.662969 -0.394574850 1.78883138 -2.20576888 0.027400185 0.11180846654224   | ENSMUST00000123766  | ENSMUSG00000021608   | Lpcat1        |
| ENSMUST00000066489                                                             | 5592.694508 0.430992845 0.195395234 2.205749008 0.027401570 0.11180846654224   | ENSMUST00000066489  | ENSMUST00000006931   | P3h4          |
| ENSMUST00000023826                                                             | 582.7838267 -0.993761550 0.450550769 -2.20565943 0.027407854 0.111813618227002 | ENSMUST00000023826  | ENSMUSG00000023064   | Sneg          |
| ENSMUST00000153977                                                             | 1005.511018 -0.568144090 0.257584290 -2.20566284 0.027407615 0.111813618227002 | ENSMUST00000153977  | ENSMUST00000068856   | Sf3b4         |
| ENSMUST00000148650                                                             | 534.3084014 -0.547796740 0.248358470 -2.20566964 0.027407138 0.111813618227002 | ENSMUST00000148650  | ENSMUSG00000026785   | Pkn3          |
| 24707.97360 0.353424971 0.160238399 2.205619701 0.027410638 0.111818160311253  | 24707.97360 0.353424971 0.160238399 2.205619701 0.027410638 0.111818160311253  | ENSMUST0000011400   | ENSMUST000000011536  | Adam19        |
| ENSMUST00000057051                                                             | 1141.724844 0.331972897 0.150521590 2.205483581 0.027420178 0.111850260042433  | ENSMUST00000057051  | ENSMUSG00000024298   | Zfp871        |
| 145.7445364 0.673954337 0.305585518 2.205452474 0.0274223590 0.111852336730624 | 145.7445364 0.673954337 0.305585518 2.205452474 0.0274223590 0.111852336730624 | ENSMUST00000146108  | ENSMUST00000028391   | Wdr31         |
| ENSMUST00000169781                                                             | 389.1964598 0.383815643 0.174032675 2.205422871 0.027424434 0.11185938371054   | ENSMUST00000169781  | ENSMUSG00000073423   | Zfp414        |
| 269.0262309 0.513393350 0.232790088 2.205391793 0.027426613 0.111856053035284  | 269.0262309 0.513393350 0.232790088 2.205391793 0.027426613 0.111856053035284  | ENSMUST00000155763  | ENSMUST00000023764   | Sfi1          |
| ENSMUST00000166544                                                             | 1063.458670 -0.673676240 0.305492346 -2.20521481 0.0274390240 0.11189984943782 | ENSMUST00000166544  | NA                   | NA            |
| 10956.17524 0.298044338 0.135159163 2.205136006 0.027444552 0.111915572151727  | 10956.17524 0.298044338 0.135159163 2.205136006 0.027444552 0.111915572151727  | ENSMUST00000151273  | ENSMUSG000000035311  | Gnptab        |
| ENSMUST00000160170                                                             | 1534.314157 -0.51338777 0.232818077 -2.20510270 0.027446888 0.111917105581262  | ENSMUST00000160170  | ENSMUSG00000024640   | Psat1         |
| ENSMUST00000173240                                                             | 550.9576370 -0.54495563 0.247136112 -2.20508296 0.027448273 0.111917105581262  | ENSMUST00000173240  | ENSMUST00000026785   | Pkn3          |
| ENSMUST00000177328                                                             | 514.9594605 0.492758866 0.24738994 2.204944888 0.027457962 0.111929331413041   | ENSMUST00000177328  | ENSMUSG00000029647   | Pan3          |
| ENSMUST00000027498                                                             | 8245.451966 0.329062915 0.149234581 2.205004440 0.027453782 0.111929331413041  | ENSMUST00000027498  | ENSMUST00000026277   | Stk25         |
| ENSMUST00000106726                                                             | 1410.136342 -0.31168335 0.141355053 -2.20496791 0.027456345 0.111929331413041  | ENSMUST00000106726  | ENSMUSG00000028608   | Me01037L13Rik |
| ENSMUST00000130421                                                             | 2307.750118 -0.324613920 0.147217765 -2.20499152 0.027454688 0.111929331413041 | ENSMUST00000130421  | ENSMUST00000003692   | Od8           |
| ENSMUST00000041736                                                             | 478.2357603 0.590390906 0.267772292 2.204824486 0.027466413 0.111956961139552  | ENSMUST00000041736  | ENSMUSG00000032425   | Hdac11        |
| ENSMUST00000134839                                                             | 7490.693731 0.333401271 0.151229970 2.204597869 0.027483235 0.11201499887565   | ENSMUST00000134839  | ENSMUST00000008401   | Adam15        |
| ENSMUST00000133774                                                             | 1399.856462 -0.58613938 0.265911207 -2.20426731 0.0275055500 0.112102832760152 | ENSMUST00000133774  | ENSMUSG00000034187   | Nsf1          |
| ENSMUST00000149901                                                             | 1384.298035 -0.42120269 0.191110338 -2.20397650 0.027525996 0.112179333063463  | ENSMUST00000149901  | ENSMUST00000022656   | Pvr3          |
| ENSMUST00000143040                                                             | 673.4778032 -0.45915759 0.208340612 -2.20379944 0.027532823 0.112200321222806  | ENSMUST00000143040  | ENSMUSG00000038451   | Spsb2         |
| ENSMUST00000110816                                                             | 126.2619658 -0.88379911 0.401031745 -2.20381335 0.027534730 0.1122143685264    | ENSMUST00000110816  | ENSMUSG00000027315   | Spin1         |
| ENSMUST00000127813                                                             | 1127.817170 -0.60125990 0.272839462 -2.20371310 0.027544526 0.112234349399973  | ENSMUST00000127813  | ENSMUST00000034187   | Nsf1          |
| ENSMUST00000101339                                                             | 79.83663287 -0.69889811 0.317139629 -2.20364297 0.027549462 0.11224621845814   | ENSMUST00000101339  | ENSMUSG00000079481   | Nhs1d         |
| ENSMUST00000151339                                                             | 560.547553 -0.59389948 0.269513930 -2.20359475 0.027552856 0.112247781310166   | ENSMUST00000151339  | ENSMUSG00000030587   | 2200002D01Rik |
| ENSMUST00000135825                                                             | 350.1140316 -0.48844352 0.221655474 -2.20361588 0.027551369 0.112247781310166  | ENSMUST00000135825  | ENSMUSG00000078700   | D030028A08Rik |
| ENSMUST00000129451                                                             | 4985.326429 -0.31362126 0.142332148 -2.20344642 0.027563299 0.11228348798865   | ENSMUST00000129451  | ENSMUST00000040048   | Ndufb10       |
| ENSMUST00000040234                                                             | 1264.168759 -0.32911642 0.149371125 -2.20334705 0.027570296 0.112305157274391  | ENSMUST00000040234  | ENSMUSG00000042389   | Tsen2         |
| ENSMUST000000020251                                                            | 10969.80391 0.297589022 0.135084949 2.202976895 0.027596370 0.112404550851573  | ENSMUST000000020251 | ENSMUST000000020251  | Gnptab        |
| ENSMUST00000114988                                                             | 4911.894330 0.343793504 0.156062241 2.202925583 0.027599994 0.11241244118915   | ENSMUST00000114988  | ENSMUSG00000024187   | Fam234a       |
| ENSMUST00000167235                                                             | 532.1583769 -0.41338380 0.187655431 -2.20288750 0.027602678 0.112416531128721  | ENSMUST00000167235  | NA                   | NA            |
| ENSMUST00000128058                                                             | 116.0169933 0.708181603 0.321497683 2.202758029 0.027611807 0.11244686915061   | ENSMUST00000128058  | ENSMUSG00000038208   | Pgap3         |
| ENSMUST00000128182                                                             | 55.06657427 0.902980333 0.409949417 2.202662806 0.027618523 0.112467374298177  | ENSMUST00000128182  | ENSMUST00000034949   | Zfr2          |
| ENSMUST00000170731                                                             | 54585.22352 -0.35203324 0.159823629 -2.20263578 0.027620429 0.112468290839028  | ENSMUST00000170731  | ENSMUSG00000020458   | Rtna          |
| ENSMUST00000072363                                                             | 29.18450315 -0.99702362 0.452656768 -2.20260403 0.027622669 0.112470568705983  | ENSMUST00000072363  | ENSMUST00000072363   | Kppr          |
| ENSMUST00000146785                                                             | 1398.1464230 0.320091063 0.145335340 2.202431033 0.027634875 0.112499007760337 | ENSMUST00000146785  | ENSMUSG00000029922   | Mkrm1         |
| ENSMUST00000036273                                                             | 9179.360731 0.445659603 0.202353093 2.202385916 0.027638059 0.112499007760337  | ENSMUST00000036273  | ENSMUST00000036273   | Nfkbi2        |
| ENSMUST00000096026                                                             | 9179.360731 0.445659603 0.202353093 2.202385916 0.027638059 0.112499007760337  | ENSMUST00000096026  | ENSMUSG00000035356   | Nfkbi2        |
| ENSMUST00000177348                                                             | 4067.1172210 3.470244480 0.157563179 2.202446310 0.027633794 0.112499007760337 | ENSMUST00000177348  | NA                   | NA            |
| ENSMUST00000125156                                                             | 577.608510 -0.392174760 0.178061146 -2.20247239 0.027631956 0.112499007760337  | ENSMUST00000125156  | ENSMUSG00000025155   | Dus1l         |
| ENSMUST00000172295                                                             | 2543.925659 -0.32097457 0.145753622 -2.20217218 0.027653147 0.112549187349571  | ENSMUST00000172295  | NA                   | NA            |
| ENSMUST00000060210                                                             | 13490.21747 0.725430516 0.329418290 2.202156152 0.027654280 0.112549187349571  | ENSMUST00000060210  | ENSMUSG00000003132   | Gpmf6b        |
| ENSMUST00000109148                                                             | 2402.773657 -0.39228802 0.178139472 -2.20213982 0.027655430 0.112549187349571  | ENSMUST00000109148  | ENSMUST00000109148   | Pfdn4         |
| ENSMUST00000129596                                                             | 1296.294890 0.486823158 0.221073138 2.202090956 0.027658884 0.112556386024465  | ENSMUST00000129596  | ENSMUSG00000020523   | Fam114a2      |
| ENSMUST00000159105                                                             | 1361.207287 -0.31827615 0.144535384 -2.20206389 0.027660590 0.11255731625533   | ENSMUST00000159105  | ENSMUST00000159105   | Zcrb1         |
| ENSMUST00000130658                                                             | 499.9129097 0.464986681 0.211162195 2.202035642 0.027662790 0.1125585941163    | ENSMUST00000130658  | ENSMUSG00000051351   | Zfp46         |
| ENSMUST00000166223                                                             | 145.3082269 0.774233643 0.351610262 2.201965434 0.027667750 0.112565084274806  | ENSMUST00000166223  | ENSMUST00000166223   | Slc38a4       |
| ENSMUST00000169355                                                             | 145.3082269 0.774233643 0.351610262 2.201965434 0.027667750 0.112565084274806  | ENSMUST00000169355  | NA                   | NA            |
| ENSMUST00000148995                                                             | 949.764678 0.475079221 0.215768166 2.201804041 0.027679153 0.112604632140191   | ENSMUST00000148995  | ENSMUSG000000148995  | Slc25a36      |
| ENSMUST00000141917                                                             | 219.3792890 0.585216673 0.265793752 2.201768662 0.027681568 0.11260761266785   | ENSMUST00000141917  | ENSMUST00000041917   | Star9d        |
| ENSMUST00000037585                                                             | 1874.887937 0.388667929 0.176527848 2.201737192 0.027683870 0.112610159972507  | ENSMUST00000037585  | ENSMUST00000037585   | Denn6a        |
| ENSMUST00000131049                                                             | 256.2887792 0.635862794 0.288805488 2.201699137 0.027686567 0.112614255973942  | ENSMUST00000131049  | ENSMUSG00000018381   | Abi3          |
| ENSMUST00000060049                                                             | 1724.280952 -0.44632277 0.202728093 -2.20158325 0.027694759 0.112627272315871  | ENSMUST00000060049  | ENSMUST00000060049   | Haus3         |
| ENSMUST00000128467                                                             | 2886.465734 -0.29046982 0.131936837 -2.20158244 0.027694817 0.112627272315871  | ENSMUST00000128467  | ENSMUSG00000039128   | Cdc123        |
| ENSMUST00000176312                                                             | 826.0960709 -0.40962795 0.186057957 -2.20161484 0.027692526 0.112627272315871  | ENSMUST00000176312  | ENSMUST00000176312   | Trub2         |
| ENSMUST00000125422                                                             | 4409.858089 -0.30147553 0.136948961 -2.20137145 0.027709738 0.112681104788023  | ENSMUST00000125422  | ENSMUSG00000027091   | Zc3h15        |
| ENSMUST00000174029                                                             | 313.5449768 -0.47833916 0.217294262 -2.20134281 0.027711763 0.112682494565283  | ENSMUST00000174029  | ENSMUST00000174029   | Zf4-Ke6       |
| ENSMUST00000114458                                                             | 9138.540177 0.446187981 0.202695010 2.201277575 0.027713679 0.1126944145048    | ENSMUST00000114458  | ENSMUSG00000035356   | Nfkbi2        |
| ENSMUST00000172626                                                             | 200.8157248 0.573248291 0.260431362 2.201149447 0.027725445 0.11272442890147   | ENSMUST00000172626  | ENSMUST00000172626   | Kmt2c         |
| ENSMUST00000081639                                                             | 11570.81590 0.498166823 0.226328310 2.201080466 0.027730327 0.11273428808483   | ENSMUST00000081639  | NA                   | NA            |
| ENSMUST00000022386                                                             | 6691.061162 0.314086519 0.142700514 2.201018828 0.027734690 0.112741467987174  | ENSMUST00000022386  | ENSMUSG00000022386   | Samd4         |
| ENSMUST00000168244                                                             | 9564.849874 0.31090139 0.141252021 -2.20104032 0.027733169 0.112741467987174   | ENSMUST00000168244  | NA                   | NA            |
| ENSMUST00000150950                                                             | 15.89719673 0.998281227 0.453567107 2.20095955 0.027739142 0.112757212470371   | ENSMUST00000150950  | ENSMUST00000150950   | Dpyd          |
| ENSMUST00000172314                                                             | 11676.12123 0.494369541 0.224624356 2.200872374 0.027745006 0.11276918303111   | ENSMUST00000172314  | ENSMUST00000029996   | Hbp1          |
| ENSMUST00000136571                                                             | 280.860287 0.616597690 0.280164038 2.200845236 0.027746981 0.112770879915544   | ENSMUST00000136571  | ENSMUST00000136571   | 2210408F21Rik |
| ENSMUST00000141340                                                             | 1338.820723 0.512308739 0.23280909 2.200553751 0.027767630 0.11284794063002    | ENSMUST00000141340  | ENSMUSG00000042613   | Pbip1         |
| ENSMUST00000145749                                                             | 1826.308509 -0.34801556 0.158152493 -2.20050632 0.027770991 0.112854752347578  | ENSMUST00000145749  | ENSMUST0000000145749 | Snf8          |
| ENSMUST00000165957                                                             | 1176.833049 0.356635604 0.162073540 2.200455442 0.027774597 0.112857298031605  | ENSMUST00000165957  | ENSMUSG00000002205   | Bod1          |
| ENSMUST00000050556                                                             | 9326.155471 0.317740441 0.144399505 2.200426104 0.027776677 0.112857298031605  | ENSMUST00000050556  | ENSMUST00000050556   | Grb10         |
| ENSMUST00000109653                                                             | 10551.66804 0.32383674 0.147168158 2.200433013 0.027776187 0.112857298031605   | ENSMUST00000109653  | ENSMUST00000020176   | Atp11a        |
| ENSMUST00000127197                                                             | 1076.936010 0.404069740 0.183641494 2.200318297 0.027784319 0.112881496208938  | ENSMUST00000127197  | ENSMUSG000000127197  | Sms           |
| ENSMUST00000112529                                                             | 2470.230215 0.39204881 0.178194304 2.200119810 0.027798395 0.112913826171615   | ENSMUST00000112529  | ENSMUSG00000012529   | NA            |
| ENSMUST00000090583                                                             | 3998.605798 0.56458872 0.256625208 -2.20005169 0.027803227 0.11294459888415    | ENSMUST00000090583  | NA                   | NA            |
| ENSMUST00000045602                                                             | 4981.131929 0.31277545 0.142174267 -2.19994420 0.027810850 0.1129687224004942  | ENSMUST00000045602  | ENSMUST00000040450   | Ndufb10       |
| ENSMUST00000054252                                                             | 3023.013398 -0.31233693 0.141984850 -2.19979054 0.027821758 0.11300300173534   | ENSMUST00000054252  | ENSMUSG00000001445   | Mrp10         |
| ENSMUST00000028225                                                             | 8234.336801 -0.29823064 0.135573081 -2.19977770 0.027822670 0.11300300173534   | ENSMUST00000028225  | ENSMUST00000028225   | Psmf5         |
| ENSMUST00000120066                                                             | 1071.880301 0.339659942 0.154411214 2.199710326 0                              |                     |                      |               |

|                    |                                                                               |                    |                      |               |
|--------------------|-------------------------------------------------------------------------------|--------------------|----------------------|---------------|
| ENSMUST00000100018 | 10252.213510.3856094660.1756068132.1958684730.0281013580.113865378897003      | ENSMUST00000100018 | NA                   | NA            |
| ENSMUST00000174413 | 88.83614040.-0.78549688.0.357729450.2.195784770.0.0281073510.113882766329565  | ENSMUST00000174413 | ENSMUSG000000027684  | Mecom         |
| ENSMUST00000123643 | 114.240295910.9110369190.0414925520.2.1956637360.0281160200.113910992533921   | ENSMUST00000123643 | ENSMUSG000000026791  | Sic2a8        |
| ENSMUST00000164548 | 2132.371766.-0.592907900.0.270068565.2.19539770.0.0281350810.113981316978592  | ENSMUST00000164548 | NA                   | NA            |
| ENSMUST00000151957 | 3542.571263.-0.42161710.0.192056690.2.19527423.0.0281439320.11401027011154    | ENSMUST00000151957 | ENSMUSG000000024851  | Pitpnm1       |
| ENSMUST00000127693 | 124.0336611.-0.62137110.0.283056931.2.19521599.0.0281481070.1140202862675     | ENSMUST00000127693 | NA                   | NA            |
| ENSMUST00000177410 | 1115.6914920.4799917380.2.186578732.1951724480.0281512290.114026027372962     | ENSMUST00000177410 | ENSMUSG000000030067  | Foxp1         |
| ENSMUST00000054107 | 860.79344610.4888433740.0.222724862.2.1948307380.0281757410.1141182431263701  | ENSMUST00000054107 | ENSMUSG000000044952  | Kctd21        |
| ENSMUST00000151747 | 808.38117740.3575662540.1629128532.1948314460.0281756900.114111497805155      | ENSMUST00000151747 | ENSMUSG000000038302  | Lace1         |
| ENSMUST00000131890 | 463.1620680.-0.40971101.0.186687218.2.19463878.0.0281895180.11411638630656    | ENSMUST00000131890 | ENSMUSG000000030287  | Itpr2         |
| ENSMUST00000081228 | 464.2226798.-0.45134914.0.205670011.2.19453066.0.0281972810.114182431263701   | ENSMUST00000081228 | NA                   | NA            |
| ENSMUST00000005503 | 2888.423968.-0.521703470.0.237730598.2.19451544.0.0281983750.114182431263701  | ENSMUST00000005503 | ENSMUSG000000005370  | Msh6          |
| ENSMUST00000147111 | 976.5689575.-0.41429339.0.188792928.2.19443279.0.0282043100.114199556067578   | ENSMUST00000147111 | ENSMUSG000000024054  | Smchd1        |
| ENSMUST00000144577 | 1723.302018.-0.342108580.0.155904277.2.19435023.0.0282102400.114216654218867  | ENSMUST00000144577 | ENSMUSG000000006392  | Med8          |
| ENSMUST00000152004 | 949.2870017.-0.708171480.0.322732664.2.194297530.0.0282140260.114225074127302 | ENSMUST00000152004 | NA                   | NA            |
| ENSMUST00000152616 | 1924.2839110.3553641520.0.1619509352.1942704480.0282159720.11422604068675     | ENSMUST00000152616 | ENSMUSG000000049470  | Aff4          |
| ENSMUST00000163922 | 41.19618620.0.973585971.0.4437129602.1941797030.0282224930.114236493308712    | ENSMUST00000163922 | ENSMUSG000000038305  | Spats2l       |
| ENSMUST00000076372 | 7674.209668.-0.63360394.0.288763114.-2.194199710.02822210550.114236493308712  | ENSMUST00000076372 | ENSMUSG000000068856  | Sf3b4         |
| ENSMUST00000175773 | 19.18411040.-0.99526669.0.453597376.2.19416324.0.0282236750.114236493308712   | ENSMUST00000175773 | ENSMUSG000000040307  | Negr1         |
| ENSMUST00000130987 | 7334.109794.-0.41425229.0.188839794.-2.19367056.0.0282591010.114372960358151  | ENSMUST00000130987 | ENSMUSG000000040990  | Sh3bnp1       |
| ENSMUST00000137149 | 277.1821090.-0.38641675.0.176169273.-2.19344012.0.0282756830.114433154862099  | ENSMUST00000137149 | ENSMUSG00000066621   | Tecpr1        |
| ENSMUST00000171145 | 2521.6762170.4545110830.2077224728.2.1932345430.0282840040.114459906733519    | ENSMUST00000171145 | NA                   | NA            |
| ENSMUST00000149717 | 96.383303530.7361543020.3356463282.1932440170.0282898020.1144764747828875     | ENSMUST00000149717 | ENSMUSG000000032064  | Dxwdc1        |
| ENSMUST00000127657 | 298.9191603.0.474019710.0.216134474.-2.193170330.0.0282951080.114480995591593 | ENSMUST00000127657 | ENSMUSG000000020289  | Npr13         |
| ENSMUST00000142860 | 48.220931620.8273202070.0.3772371682.1931036380.0282999120.114503551253861    | ENSMUST00000142860 | ENSMUSG000000012860  | Rgr13         |
| ENSMUST00000159215 | 56.583754210.7110804280.3242450272.1930341840.0283049160.114516831013688      | ENSMUST00000159215 | ENSMUSG000000038538  | Ubr2          |
| ENSMUST00000140867 | 135.5016322.-0.65242811.0.297581459.2.19243535.0.0283408960.11464856132833    | ENSMUST00000140867 | ENSMUSG000000027346  | Gcpd1         |
| ENSMUST00000021547 | 3669.0420150.3353036150.0.1529389662.1924014680.0283505300.114687511302902    | ENSMUST00000021547 | ENSMUSG000000066440  | Zhyve26       |
| ENSMUST00000156889 | 1720.442147.-0.303037950.0.182317147.-2.19224572.0.0283617680.11471778234928  | ENSMUST00000156889 | ENSMUSG000000014301  | Pam16         |
| ENSMUST00000155929 | 976.7292286.-0.633277250.288870318.-2.19225450.0.0283611340.11471778234928    | ENSMUST00000155929 | ENSMUSG000000022797  | Tfrc          |
| ENSMUST00000146361 | 439.3161797.-0.41752461.0.190456878.2.19222649.0.0283631560.11471778234928    | ENSMUST00000146361 | ENSMUSG000000003731  | Kpna6         |
| ENSMUST00000160007 | 28.014498890.9400179660.4288289652.1920580040.0283753180.114760036735804      | ENSMUST00000160007 | ENSMUSG000000055692  | Tmem191c      |
| ENSMUST00000167797 | 8306.370530.-0.42787980.0.195220798.-2.191975780.0283812550.11477110831543    | ENSMUST00000167797 | ENSMUSG000000017797  | Phykp1        |
| ENSMUST00000119025 | 2311.9739020.3204765850.1462313132.1918454240.0283906690.114808245555717      | ENSMUST00000119025 | ENSMUSG000000029311  | Hsd17b11      |
| ENSMUST00000032800 | 25.899141970.985678941.0.4497282172.1917213630.028396320.114816734294638      | ENSMUST00000032800 | ENSMUSG000000030579  | Tyrobp        |
| ENSMUST00000124858 | 777.1019952.-0.43130949.0.196787647.-2.191750880.0283974990.114816734294638   | ENSMUST00000124858 | ENSMUSG000000022538  | Lsg1          |
| ENSMUST00000168131 | 10.546761300.9930251950.0.4530708102.1917659920.0283964100.114816734294638    | ENSMUST00000168131 | NA                   | NA            |
| ENSMUST00000200321 | 1964.7427060.4503641270.2054823242.1917414530.0283981800.114816734294638      | ENSMUST00000200321 | ENSMUSG000000020120  | Plek          |
| ENSMUST00000141959 | 66.392981870.7687150890.3507608430.1915647190.0284109510.11485559253238       | ENSMUST00000141959 | ENSMUSG000000022773  | Ypel1         |
| ENSMUST00000175884 | 1139.572147.-0.364836290.166481510.-2.19145235.0.0284190730.114881453101073   | ENSMUST00000175884 | ENSMUSG000000001909  | Trmt1         |
| ENSMUST00000031687 | 1436.7212330.2974295570.0.1357249272.1914143680.0284218200.114885615613993    | ENSMUST00000031687 | NA                   | NA            |
| ENSMUST00000077930 | 2831.3741070.4559552660.2080700952.1913541410.0284261740.114896277793072      | ENSMUST00000077930 | ENSMUSG000000077930  | Dtnb          |
| ENSMUST00000131984 | 177.2364670.-0.75026649.0.342395049.-2.19123055.0.0284351120.114925460418532  | ENSMUST00000131984 | NA                   | NA            |
| ENSMUST00000088767 | 7626.0312330.4294407110.1959854722.1911864420.0284383030.114931415520475      | ENSMUST00000088767 | NA                   | NA            |
| ENSMUST00000124977 | 253.9680634.-0.76290594.0.348174028.2.19116269.0.0284400210.11493141686628    | ENSMUST00000124977 | ENSMUSG000000063445  | Nmrnl1        |
| ENSMUST00000089825 | 2609.347572.-0.441171110.0.201343725.-2.191134180.0284420830.114938211515098  | ENSMUST00000089825 | ENSMUSG000000027201  | Myef2         |
| ENSMUST00000107613 | 1423.2264500.3576504580.1632284562.1911035980.0284442960.114934812251518      | ENSMUST00000107613 | ENSMUSG000000017613  | Tbkbp1        |
| ENSMUST00000098180 | 173.32555250.7132333310.3255255652.1910209440.0284502760.114952036353142      | ENSMUST00000098180 | ENSMUSG000000072244  | Trim6         |
| ENSMUST00000100078 | 956.3742160.-0.45612236.0.208185623.-2.19094075.0.0284560790.114968541275867  | ENSMUST00000100078 | ENSMUSG000000010078  | Zbtb2         |
| ENSMUST00000128266 | 421.2820831.-0.67660963.0.308909031.-2.19058222.0.0284802380.115066471622451  | ENSMUST00000128266 | ENSMUSG000000020781  | Tsen54        |
| ENSMUST00000035220 | 6977.091987.-0.697439140.0.318391050.-2.19051114.0.0284871870.115080327002778 | ENSMUST00000035220 | ENSMUSG000000035220  | Pkr1a2a       |
| ENSMUST00000161451 | 45.903341480.8262326090.3772055002.1904044550.0284945170.115100143876129      | ENSMUST00000161451 | ENSMUSG000000048012  | Gliz          |
| ENSMUST00000156711 | 7349.8421060.2875798890.0.1312912802.1903959550.0284953300.115100143876129    | ENSMUST00000156711 | ENSMUSG000000026848  | Tor1b         |
| ENSMUST00000072863 | 3718.9127010.3439174840.0.1570155812.1903398450.0284995990.115109619375276    | ENSMUST00000072863 | ENSMUSG000000052534  | Pbx1          |
| ENSMUST00000147116 | 31.672566160.9286747930.4239996612.1902724860.0285044800.115122388700929      | ENSMUST00000147116 | ENSMUSG000000014716  | Pik3r5        |
| ENSMUST00000140305 | 1373.034030.-0.349166390.0.159421263.-2.19021218.0.0285088510.115133093344216 | ENSMUST00000140305 | ENSMUSG000000033543  | Gtf2a2        |
| ENSMUST00000038719 | 4069.387486.-0.320207470.0.146208016.-2.19008153.0.0285183240.115164396185156 | ENSMUST00000038719 | ENSMUSG000000038719  | Nudcd1        |
| ENSMUST00000174547 | 2811.8928510.4572408160.2087870632.1899863330.0285252270.115185325066782      | ENSMUST00000174547 | ENSMUSG000000071454  | Dtnb          |
| ENSMUST00000127963 | 5285.956383.-0.310732800.0.141891483.-2.18993275.0.0285291130.115194065487739 | ENSMUST00000127963 | ENSMUSG0000000127963 | Eif2c3x       |
| ENSMUST00000031445 | 5984.078557.-0.344939130.0.157519238.-2.18982226.0.0285371290.115212527172179 | ENSMUST00000031445 | ENSMUSG000000029482  | Aacs          |
| ENSMUST00000130570 | 122.67067080.6862064560.3133593002.1898391240.0285359060.115212527172179      | ENSMUST00000130570 | ENSMUSG000000017893  | 4933439C10rik |
| ENSMUST00000159815 | 3996.640334.-0.362706370.0.165635239.-2.18978991.0.0285394760.115215049949187 | ENSMUST00000159815 | ENSMUSG000000001729  | Akt1          |
| ENSMUST00000050714 | 9.683968603.0.9704685540.4432027932.1896715650.0285480640.1152524691284067    | ENSMUST00000050714 | ENSMUSG0000000050714 | lgfals        |
| ENSMUST00000208551 | 4769.981768.-0.29006561.0.132471339.-2.18964810.0.028549760.115242691284067   | ENSMUST00000208551 | ENSMUSG000000027131  | Emc4          |
| ENSMUST00000143456 | 8257.125063.-0.297253640.0.135756372.-2.18961101.0.0285524590.11524607323768  | ENSMUST00000143456 | ENSMUSG000000026869  | Psmid5        |
| ENSMUST00000154602 | 375.3507219.-0.460432060.210285156.-2.18956046.0.0285561280.115254463913705   | ENSMUST00000154602 | ENSMUSG000000040167  | Ikzf5         |
| ENSMUST00000139044 | 3920.6002570.3332446110.0.1521992962.1895279280.0285584900.1152570468551      | ENSMUST00000139044 | ENSMUSG000000029106  | Add1          |
| ENSMUST00000113533 | 762.5166430.-0.57957706.0.276422640.-2.18937473.0.0285696140.115267180508711  | ENSMUST00000113533 | ENSMUSG000000024790  | Sac3d1        |
| ENSMUST00000100405 | 4850.9451080.5588437390.2552469952.1894233770.0285660820.115267180508711      | ENSMUST00000100405 | NA                   | NA            |
| ENSMUST00000110835 | 7673.5819230.4295312400.1961884432.1893809440.0285691630.115267180508711      | ENSMUST00000110835 | ENSMUSG000000036461  | Eif1          |
| ENSMUST00000141324 | 2690.097975.-0.33889417.0.154787560.-2.189414780.0285667050.115267180508711   | ENSMUST00000141324 | ENSMUSG000000040048  | Ndufb10       |
| ENSMUST00000125399 | 349.53511670.4375563020.1998490172.1894343380.0285652860.115267180508711      | ENSMUST00000125399 | ENSMUSG000000035969  | Rusc2         |
| ENSMUST00000208016 | 26057.3642120.308203730.0.1407799472.1892587380.0285780390.115280321302865    | ENSMUST00000208016 | ENSMUSG000000028016  | Prrc2c        |
| ENSMUST00000046646 | 26057.3642120.308203730.0.1407799472.1892587380.0285780390.115280321302865    | ENSMUST00000046646 | NA                   | NA            |
| ENSMUST00000144374 | 6880.951636.-0.52507988.0.239842592.2.189268710.0285773140.115280321302865    | ENSMUST00000144374 | ENSMUSG000000040463  | Mybbp1a       |
| ENSMUST00000161641 | 292.9837254.-0.450887630.205961340.-2.189185770.028583400.11528085537481      | ENSMUST00000161641 | ENSMUSG000000016141  | Fam20c        |
| ENSMUST00000147180 | 38.50775341.-0.913358600.417122797.-2.189191240.0285829420.11528085537481     | ENSMUST00000147180 | ENSMUSG000000033715  | Akr1c14       |
| ENSMUST00000087803 | 427.72296450.4823124730.2203112102.1892325500.0285799410.11528085537481       | ENSMUST00000087803 | NA                   | NA            |
| ENSMUST00000106539 | 2185.885632.-0.39086003.0.178558899.-2.18969800.0285990350.115327204061228    | ENSMUST00000106539 | ENSMUSG000000018858  | Ict1          |
| ENSMUST00000139578 | 5553.041340.-0.31565391.0.144204383.-2.188934250.0286016190.115340674695509   | ENSMUST00000139578 | ENSMUSG000000025917  | Cops5         |
| ENSMUST00000160169 | 80.939477060.1868032210.3114918762.1888314710.0286090910.115363855260273      | ENSMUST00000160169 | ENSMUSG000000026489  | Adck3         |
| ENSMUST00000096744 | 55015.729200.2775493290.1268071212.1887519010.0286148770.115374114654332      | ENSMUST00000096744 | ENSMUSG000000096744  | Myadm         |
| ENSMUST00000148046 | 15659.890570.9511425550.4345598912.1887490620.0286150830.115374114654332      | ENSMUST00000148046 | ENSMUSG000000001506  | Col1a1        |
| ENSMUST00000127741 | 1829.710350.-0.43263904.0.197683173.-2.18854166.0.0286301690.11542798416236   | ENSMUST00000127741 | ENSMUSG0000000127741 | Gtpbp3        |
| ENSMUST00000171728 | 279.4                                                                         |                    |                      |               |

|                    |                                                                                   |                    |                     |               |
|--------------------|-----------------------------------------------------------------------------------|--------------------|---------------------|---------------|
| ENSMUST00000130456 | 349.1788654 - 0.51770748 0.236804360 - 2.18622447 0.028799186 0.115865085326948   | ENSMUST00000130456 | ENSMUSG000000027298 | Tyro3         |
| ENSMUST00000129731 | 1330.3779190.726549811 0.332338884 2.186171538 0.0288030570 0.115873693321342     | ENSMUST00000129731 | ENSMUSG000000031342 | Gpm6b         |
| ENSMUST00000100943 | 172.7222580 0.618230018 0.282809206 2.186032152 0.0288132530 0.115907740830349    | ENSMUST00000100943 | ENSMUSG000000018648 | Gm10418       |
| ENSMUST00000108101 | 271.7844304 - 0.72118568 0.329915598 - 2.18597024 0.028817782 0.11591899297534    | ENSMUST00000108101 | ENSMUSG000000012768 | Dusp14        |
| ENSMUST00000402493 | 2385.210917 0.334428172 0.152993392 2.185899444 0.028822962 0.11593286243989      | ENSMUST00000402493 | ENSMUSG000000402111 | Cdc115        |
| ENSMUST00000123069 | 2791.752925 - 0.29659227 0.135693454 - 2.18575224 0.028833736 0.115969226064632   | ENSMUST00000123069 | ENSMUSG000000035297 | Cops4         |
| ENSMUST00000137521 | 46.05111931 - 0.93282146 0.426847114 - 2.18537605 0.028861285 0.11607305103593    | ENSMUST00000137521 | ENSMUSG00000051855  | Mest          |
| ENSMUST00000100747 | 2441.783200 - 0.50003930 0.228819699 - 2.18529830 0.028866981 0.116088983089486   | ENSMUST00000100747 | ENSMUSG000000046267 | Hvcn1         |
| ENSMUST00000160613 | 891.0686060 0.363318835 0.166267389 2.185147892 0.028878004 0.116091452345543     | ENSMUST00000160613 | ENSMUSG000000003500 | Impdh1        |
| ENSMUST00000133693 | 69.82351019 - 0.79462070 0.363627070 - 2.18526279 0.028869583 0.116091452345543   | ENSMUST00000133693 | NA                  | NA            |
| ENSMUST00000161760 | 787.4800722 - 0.56656501 0.259279208 - 2.18515406 0.028877552 0.116091452345543   | ENSMUST00000161760 | ENSMUSG00000026694  | Mett113       |
| ENSMUST00000147256 | 184.3078335 - 0.53948268 0.246682186 - 2.18518271 0.028875452 0.116091452345543   | ENSMUST00000147256 | ENSMUSG000000050471 | Fam118b       |
| ENSMUST00000140893 | 1071.3491100 0.486346484 0.222568368 2.185155450 0.0288774500 0.116091452345543   | ENSMUST00000140893 | ENSMUSG00000028164  | Manba         |
| ENSMUST00000153425 | 1731.881669 0.355789329 0.162821557 2.185148785 0.0288779390 0.116091452345543    | ENSMUST00000153425 | ENSMUSG000000023764 | Sfi1          |
| ENSMUST00000131943 | 902.1212341 - 0.36858930 0.168695217 - 2.18494225 0.028893080 0.116143690354179   | ENSMUST00000131943 | ENSMUSG00000023967  | Mrps18a       |
| ENSMUST00000101401 | 464.7528954 - 0.38234547 0.174992630 - 2.18492330 0.028894700 0.116143690354179   | ENSMUST00000101401 | NA                  | NA            |
| ENSMUST00000171178 | 51.85730071 - 0.99167253 0.453885231 - 2.18485305 0.028899622 0.11615742229336    | ENSMUST00000171178 | ENSMUSG000000021697 | Depdc1b       |
| ENSMUST00000126029 | 673.7458391 - 0.45236847 0.20705735 - 2.18474771 0.028907349 0.116181503797825    | ENSMUST00000126029 | ENSMUSG00000052926  | Rnaseh2a      |
| ENSMUST00000161406 | 251.3136374 0.507023347 0.232083300 2.184661053 0.028913770 0.116193099975307     | ENSMUST00000161406 | ENSMUSG000000016194 | Hsd11b1       |
| ENSMUST00000156669 | 3816.842935 0.386304828 0.176825417 2.184667978 0.0289131990 0.116193099975307    | ENSMUST00000156669 | ENSMUSG00000026883  | Dab2ip        |
| ENSMUST00000153135 | 795.6549346 - 0.35739477 0.163611028 - 2.18441740 0.028931590 0.116257981285159   | ENSMUST00000153135 | NA                  | NA            |
| ENSMUST00000174485 | 1091.752850 - 0.49594737 0.227045298 - 2.18435430 0.028936230 0.1162696155622     | ENSMUST00000174485 | ENSMUSG00000036990  | Oturd4        |
| ENSMUST00000161016 | 3006.656728 0.325488433 0.149012896 2.184297068 0.0289404260 0.116279521489309    | ENSMUST00000161016 | ENSMUSG00000003287  | Kctd17        |
| ENSMUST00000153983 | 2189.675200 0.39042781 0.178754015 - 2.18416247 0.028950311 0.116312256492277     | ENSMUST00000153983 | ENSMUSG00000018858  | Ict1          |
| ENSMUST00000075149 | 1866.585509 - 0.31842030 0.145795041 - 2.18402698 0.028960265 0.11634261512297    | ENSMUST00000075149 | ENSMUST00000075149  | NA            |
| ENSMUST00000028017 | 2012.849200 0.52934472 0.242375366 - 2.18398732 0.028963179 0.11634985264992      | ENSMUST00000028017 | ENSMUSG00000026694  | Mett113       |
| ENSMUST00000070793 | 1009.973515 - 0.37380920 0.171169282 - 2.18385681 0.028977710 0.116374543330011   | ENSMUST00000070793 | NA                  | NA            |
| ENSMUST00000131292 | 681.0095410 0.554852595 0.254068434 2.183870646 0.028971754 0.116374543330011     | ENSMUST00000131292 | ENSMUSG00000027439  | Gtf1          |
| ENSMUST00000052837 | 818.7834230 - 0.51345906 0.235129869 - 2.18372537 0.0289824330 0.116392397276206  | ENSMUST00000052837 | ENSMUSG000000046532 | Ar            |
| ENSMUST00000052018 | 1936.3442420 0.482410803 0.220980431 2.183759123 0.028979520 0.116392397276206    | ENSMUST00000052018 | ENSMUSG00000028565  | Nfia          |
| ENSMUST00000153188 | 63.98651278 - 0.72453390 0.331785371 - 2.18374277 0.0289811540 0.116392397276206  | ENSMUST00000153188 | ENSMUSG000000051388 | 251035D132Rik |
| ENSMUST00000168620 | 490.4569729 0.503609015 0.230625089 2.183669683 0.0289865280 0.11640185713174     | ENSMUST00000168620 | NA                  | NA            |
| ENSMUST00000109037 | 26.32952247 0.892060241 0.408550184 2.183477762 0.0290006440 0.11645155425491     | ENSMUST00000109037 | NA                  | NA            |
| ENSMUST00000026976 | 4334.019505 - 0.41840133 0.191638617 - 2.18328297 0.029014977 0.116502116718407   | ENSMUST00000026976 | ENSMUSG00000025858  | Get4          |
| ENSMUST00000029941 | 16639.25107 - 0.37286885 0.170795255 - 2.18313356 0.0290259750 0.11659282519932   | ENSMUST00000029941 | ENSMUSG0000002873   | Pdlim5        |
| ENSMUST00000110876 | 529.1611611 - 0.45820883 0.209891725 - 2.18307243 0.0290304760 0.116543369063489  | ENSMUST00000110876 | ENSMUSG00000031442  | Mcf2l         |
| ENSMUST00000064464 | 529.1611611 - 0.45820883 0.209891725 - 2.18307243 0.0290304760 0.116543369063489  | ENSMUST00000064464 | NA                  | NA            |
| ENSMUST00000161076 | 1797.319759 - 0.35275967 0.161598420 - 2.18294011 0.0290402200 0.116575493301477  | ENSMUST00000161076 | ENSMUSG00000040331  | Nsmcse4a      |
| ENSMUST00000149989 | 3155.7708010 0.341076284 0.156250799 2.182877050 0.029044865 0.116587146053686    | ENSMUST00000149989 | ENSMUSG00000071074  | Yipf3         |
| ENSMUST00000166445 | 1443.1091360 0.295609716 0.135435541 2.182659832 0.0290680700 0.116621062585993   | ENSMUST00000166445 | ENSMUSG00000029676  | Pot1a         |
| ENSMUST00000067638 | 876.7379918 - 0.387229521 0.177414213 - 2.18262968 0.029063091 0.116621062585993  | ENSMUST00000067638 | ENSMUSG00000054520  | Sh3bp2        |
| ENSMUST00000116507 | 1042.511287 - 0.31476066 0.144213520 - 2.18260161 0.0290651620 0.116621062585993  | ENSMUST00000116507 | NA                  | NA            |
| ENSMUST00000152782 | 8603.4819370 0.565652240 0.259150137 2.182701440 0.0290564250 0.116621062585993   | ENSMUST00000152782 | ENSMUSG00000075254  | Heg1          |
| ENSMUST00000209664 | 410.1422398 0.660805693 0.305174496 2.182638789 0.029064200 0.116621062585993     | ENSMUST00000209664 | ENSMUSG00000020635  | Fkbp1b        |
| ENSMUST00000105720 | 302.2451001 - 0.65797139 0.301462638 - 2.18259681 0.0290655140 0.116621062585993  | ENSMUST00000105720 | ENSMUSG000000105720 | 261030SD13Rik |
| ENSMUST00000134759 | 543.7663968 - 0.427335350 0.195781696 - 2.18271348 0.0290569150 0.116621062585993 | ENSMUST00000134759 | ENSMUSG00000002728  | Naa20         |
| ENSMUST00000142358 | 1806.040510 - 0.42519711 0.194815106 - 2.18256746 0.0290676770 0.11662750438157   | ENSMUST00000142358 | ENSMUSG00000031575  | Ash2l         |
| ENSMUST00000107062 | 1935.362182 0.482785211 0.221204346 2.182530405 0.029070409 0.1166267194597       | ENSMUST00000107062 | ENSMUSG00000028565  | Nfia          |
| ENSMUST00000103036 | 2160.686175 - 0.389975460 0.178690200 - 2.18241103 0.0290792100 0.116655032636895 | ENSMUST00000103036 | ENSMUSG00000013688  | Ict1          |
| ENSMUST0000098861  | 1527.3854150 0.426301994 0.195344917 2.182303992 0.029087104 0.116677212438735    | ENSMUST0000098861  | ENSMUSG00000046519  | Golph3l       |
| ENSMUST00000105671 | 3006.9029180 0.990010572 0.453653080 2.182307614 0.029086837 0.116677212438735    | ENSMUST00000105671 | ENSMUSG00000028965  | Tfrsf9        |
| ENSMUST0000033819  | 527.9755741 - 0.456911450 0.209398176 - 2.18202214 0.0291078980 0.116734852682479 | ENSMUST0000033819  | NA                  | NA            |
| ENSMUST00000110866 | 527.9755741 - 0.456911450 0.209398176 - 2.18202214 0.0291078980 0.116734852682479 | ENSMUST00000110866 | ENSMUSG000000031442 | Mcf2l         |
| ENSMUST00000133495 | 97.034858190 0.631210163 0.289280626 2.181999438 0.0291095740 0.116734852682479   | ENSMUST00000133495 | ENSMUSG00000070282  | 3000002C10Rik |
| ENSMUST00000084952 | 336.3848449 0.419106024 0.192069097 2.182058592 0.0291052080 0.116734852682479    | ENSMUST00000084952 | ENSMUSG00000032489  | Kif9          |
| ENSMUST00000078449 | 10689.199780 0.331232915 0.151813836 2.181836149 0.0291216270 0.116776190816931   | ENSMUST00000078449 | NA                  | NA            |
| ENSMUST00000402852 | 8397.179662 0.339344958 0.155553765 2.181528403 0.0291443550 0.116789424651332    | ENSMUST00000402852 | ENSMUSG00000038121  | Fam210a       |
| ENSMUST00000112291 | 3178.117648 - 0.70227060 0.321909765 - 2.18157596 0.0291408420 0.116789424651332  | ENSMUST00000112291 | NA                  | NA            |
| ENSMUST0000046632  | 25861.765990 0.307127434 0.140784298 2.181546078 0.0291430500 0.116789424651332   | ENSMUST0000046632  | ENSMUST00000046632  | NA            |
| ENSMUST00000500715 | 4093.433175 - 0.56113733 0.257207167 - 2.18165512 0.0291349950 0.116789424651332  | ENSMUST00000500715 | ENSMUSG000000021733 | Slc4a7        |
| ENSMUST00000128250 | 942.8439646 0.318723204 0.146091038 2.181675269 0.0291335070 0.116789424651332    | ENSMUST00000128250 | ENSMUST00000128250  | Araf          |
| ENSMUST00000133757 | 1068.196157 - 0.38446723 0.176220254 - 2.18174258 0.0291285360 0.116789424651332  | ENSMUST00000133757 | ENSMUSG00000032349  | Elovl5        |
| ENSMUST00000151181 | 84.80211404 0.904109643 0.41441179 2.181514982 0.0291453470 0.116789424651332     | ENSMUST00000151181 | ENSMUSG00000002844  | Cntrf         |
| ENSMUST00000123134 | 61.99789620 0.710874830 0.325850019 2.181601335 0.0291389680 0.116789424651332    | ENSMUST00000123134 | ENSMUSG00000041351  | Rap1gap       |
| ENSMUST00000111370 | 454.5988238 - 0.57864333 0.265240297 - 2.18158152 0.0291404310 0.116789424651332  | ENSMUST00000111370 | ENSMUST00000011370  | Madd          |
| ENSMUST00000099723 | 454.5988238 - 0.57864333 0.265240297 - 2.18158152 0.0291404310 0.116789424651332  | ENSMUST00000099723 | ENSMUSG00000040687  | Madd          |
| ENSMUST00000111376 | 454.5988238 - 0.57864333 0.265240297 - 2.18158152 0.0291404310 0.116789424651332  | ENSMUST00000111376 | ENSMUSG00000040687  | Madd          |
| ENSMUST00000152418 | 332.1556109 - 0.566508940 0.259688662 - 2.18150789 0.0291458700 0.116789424651332 | ENSMUST00000152418 | ENSMUSG00000035268  | Pkig          |
| ENSMUST0000029639  | 7694.964443 - 0.37962248 0.174024596 - 2.18143004 0.0291516230 0.116805480069924  | ENSMUST0000029639  | ENSMUSG00000028007  | Smx7          |
| ENSMUST00000153616 | 458.2776402 0.419706045 0.192402039 2.181401230 0.0291535720 0.116807018670597    | ENSMUST00000153616 | ENSMUSG000000085741 | 5430405H02Rik |
| ENSMUST00000171470 | 357727.7326 0.978884301 0.448767145 2.181274436 0.0291631240 0.116831401018207    | ENSMUST00000171470 | ENSMUSG00000024529  | Lox           |
| ENSMUST00000124155 | 514.1391821 - 0.509157880 0.233422499 - 2.18127164 0.0291633300 0.116831401018207 | ENSMUST00000124155 | ENSMUSG00000036002  | Fam214b       |
| ENSMUST00000176658 | 727.0199398 - 0.35255394 0.161646656 - 2.18101599 0.0291822330 0.116909130764818  | ENSMUST00000176658 | ENSMUSG000000174658 | Slit2         |
| ENSMUST00000034359 | 1802.218304 0.301179769 0.138097679 2.180918390 0.0291894530 0.116908057762564    | ENSMUST00000034359 | ENSMUSG00000031887  | Tradd         |
| ENSMUST00000029344 | 15129.72970 0.34824028 0.159674664 - 2.18093634 0.0291881240 0.116908057762564    | ENSMUST00000029344 | ENSMUSG00000027775  | Mfsl1         |
| ENSMUST00000135960 | 1270.578712 0.37934279 0.171453597 2.180964911 0.029186011 0.116908057762564      | ENSMUST00000135960 | ENSMUSG00000035960  | Wars2         |
| ENSMUST00000119591 | 6170.725702 - 0.31566241 0.144748199 - 2.18076921 0.029200490 0.116945266124246   | ENSMUST00000119591 | ENSMUSG00000025199  | Chuk          |
| ENSMUST00000172532 | 53.6703577 - 0.82646176 0.379012384 - 2.18056665 0.0292154830 0.11698380978503    | ENSMUST00000172532 | ENSMUSG00000042942  | Heg1l         |
| ENSMUST00000164553 | 54042.15065 0.276430087 0.126773796 2.1804986120 0.0292205210 0.117000065572608   | ENSMUST00000164553 | ENSMUSG00000068566  | Hyadm         |
| ENSMUST0000063183  | 6392.128891 0.345255957 0.158347238 2.180395448 0.029228161 0.117000065572608     | ENSMUST0000063183  | ENSMUSG00000066306  | Numa1         |
| ENSMUST00000120645 | 653.2697910 - 0.50329094 0.230810977 - 2.18053295 0.0292179790 0.117000065572608  | ENSMUST00000120645 | ENSMUSG00000025069  | Gsto2         |
| ENSMUST00000005722 | 490.3281502 0.502989940 0.230684668 2.1804206                                     |                    |                     |               |

|                     |                                                                                 |                     |                     |               |
|---------------------|---------------------------------------------------------------------------------|---------------------|---------------------|---------------|
| ENSMUST00000175661  | 37.97474899 -0.92065770 0.422555282 -2.17878640 0.0293475390.117243219102493    | ENSMUST00000175661  | ENSMUSG000000020892 | Aloxe3        |
| ENSMUST00000124349  | 1840.397073 -0.43273974 0.198622497 -2.178704570 0.0293536220.117256786046516   | ENSMUST00000124349  | ENSMUSG000000014349 | Gtpbp3        |
| ENSMUST00000065916  | 132.09292070 0.878067270 0.403043524 2.178591680 0.0293620140.117283310727279   | ENSMUST00000065916  | ENSMUSG000000054675 | Tg            |
| ENSMUST00000152359  | 198.1651133 -0.59257367 0.272003332 -2.17855299 0.0293648910.117287800262975    | ENSMUST00000152359  | ENSMUSG000000020253 | Ppm1m         |
| ENSMUST00000075799  | 18326.93476 -0.331947070 0.152376077 -2.17847237 0.0293708860.117304744462393   | ENSMUST00000075799  | NA                  | NA            |
| ENSMUST00000102786  | 455.1326793 0.564056961 0.258928127 2.1784306220 0.0293739920.117310145938917   | ENSMUST00000102786  | ENSMUSG00000028549  | Itgh3bp       |
| ENSMUST00000137888  | 318.9422324 -0.400945090 0.184069358 -2.17822836 0.0293890390.117330399339647   | ENSMUST00000137888  | ENSMUSG000000448787 | Dcun1d3       |
| ENSMUST00000112046  | 5495.701046 0.391136925 0.179559879 2.1783091320 0.0293830290.11728780039647    | ENSMUST00000112046  | ENSMUSG000000014483 | Zfp281        |
| ENSMUST00000447734  | 5495.701046 0.391136925 0.179559879 2.1783091320 0.0293830290.117330399339647   | ENSMUST00000447734  | ENSMUSG000000444783 | Zfp281        |
| ENSMUST00000153013  | 286.6822129 -0.66855195 0.306920195 -2.17825990 0.0293866920.11733591121838     | ENSMUST00000153013  | ENSMUSG000000011831 | Gm14820       |
| ENSMUST00000144963  | 465.7447059 0.396962971 0.182238748 2.178257775 0.0293868500.117330399339647    | ENSMUST00000144963  | ENSMUSG00000026972  | Arrdc1        |
| ENSMUST00000111373  | 450.3023599 -0.57488938 0.263928955 -2.17819748 0.0293913360.117330399339647    | ENSMUST00000111373  | ENSMUSG000000040687 | Madd          |
| ENSMUST00000111375  | 450.3023599 -0.57488938 0.263928955 -2.17819748 0.0293913360.117330399339647    | ENSMUST00000111375  | ENSMUSG00000040687  | Madd          |
| ENSMUST00000031555  | 85.94997893 -0.92194295 0.423267556 -2.17815645 0.0293943900.117335591121838    | ENSMUST00000031555  | ENSMUSG000000029570 | Lfrng         |
| ENSMUST00000081134  | 15.19859123 0.979499846 0.449700530 2.1781158370 0.0293974130.117340658352808   | ENSMUST00000081134  | ENSMUSG000000060445 | Sycp2         |
| ENSMUST00000154236  | 2389.482803 -0.50442143 0.231591183 -2.17806840 0.0294009440.1173477525699      | ENSMUST00000154236  | ENSMUSG000000338880 | Mrps34        |
| ENSMUST00000773308  | 16897.36493 -0.36405337 0.167166525 -2.17778871 0.0294217700.117423870770549    | ENSMUST00000773308  | ENSMUSG00000009079  | Ewsr1         |
| ENSMUST00000129405  | 2655.160554 0.366254567 0.168186684 2.177668540 0.0294308480.117453095455303    | ENSMUST00000129405  | ENSMUSG000000033943 | Mga           |
| ENSMUST00000112536  | 1156.578762 -0.43193388 0.198356096 -2.17756798 0.0294382150.117475490430879    | ENSMUST00000112536  | ENSMUSG000000066613 | Zfp932        |
| ENSMUST00000123061  | 318.6286331 0.565539738 0.259730883 2.1774065930 0.0294502440.117502470735191   | ENSMUST00000123061  | ENSMUSG00000028164  | Mamba         |
| ENSMUST00000143228  | 444.5772825 -0.55619132 0.255434895 -2.17742892 0.0294485790.117502470735191    | ENSMUST00000143228  | ENSMUSG000000020389 | Cdk13         |
| ENSMUST00000150549  | 2947.958122 0.286448766 0.131554757 2.1774109330 0.0294489920.117502470735191   | ENSMUST00000150549  | ENSMUSG000000020777 | Acot1         |
| ENSMUST00000125235  | 1243.291419 -0.35896531 0.164874288 -2.17720617 0.0294651870.117555085212094    | ENSMUST00000125235  | ENSMUSG00000006392  | Med8          |
| ENSMUST00000043848  | 3207.615856 -0.70077474 0.321893340 -2.17704020 0.0294775680.117597466346027    | ENSMUST00000043848  | ENSMUSG00000008252  | Ncapd2        |
| ENSMUST00000159618  | 30.21366820 0.865615646 0.397631391 2.176929856 0.0294858010.117622275165157    | ENSMUST00000159618  | ENSMUSG00000090931  | 4732440D04Rik |
| ENSMUST00000024720  | 105.325893 0.85720337 0.393770745 -2.17690974 0.0294873020.117622275165157      | ENSMUST00000024720  | NA                  | NA            |
| ENSMUST00000167172  | 1409.881147 -0.47383309 0.217688018 -2.17666134 0.0295058440.117689224577565    | ENSMUST00000167172  | ENSMUSG00000024858  | Adrbk1        |
| ENSMUST00000106366  | 1585.074197 -0.54330364 0.249620640 -2.17651732 0.0295165990.117718090004382    | ENSMUST00000106366  | NA                  | NA            |
| ENSMUST00000166226  | 1585.074197 -0.54330364 0.249620640 -2.17651732 0.0295165990.117718090004382    | ENSMUST00000166226  | NA                  | NA            |
| ENSMUST00000164654  | 7606.571764 0.332295407 0.152676405 2.1764686290 0.0295202360.117725579037944   | ENSMUST00000164654  | NA                  | NA            |
| ENSMUST00000163402  | 5763.515414 -0.29986751 0.137779512 -2.17643038 0.0295230930.11772956124069     | ENSMUSG000000163402 | ENSMUSG000000090935 | Synj2bp       |
| ENSMUST00000085651  | 29273.912160 0.391548469 0.179911506 2.1763392240 0.0295299040.117750098758205  | ENSMUST00000085651  | ENSMUSG000000032336 | Npntn         |
| ENSMUST00000173565  | 4214.359011 -0.29762830 0.136758693 -2.17630262 0.0295326390.117753987646186    | ENSMUST00000173565  | ENSMUSG000000017428 | Psmid11       |
| ENSMUST00000084828  | 2670.396666 -0.70114985 0.322217112 -2.17601681 0.0295540030.11783215007263     | ENSMUST00000084828  | ENSMUSG00000042029  | Ncapg2        |
| ENSMUST00000130197  | 169.1561948 0.572942310 0.263327051 2.1757821940 0.0295715000.117895086622113   | ENSMUST00000130197  | ENSMUSG00000073888  | Ccl27a        |
| ENSMUST00000167458  | 6293.2389240 0.502014786 0.230736108 2.1757096830 0.0295769750.1179096904747373 | ENSMUST00000167458  | ENSMUSG00000002996  | Hbp1          |
| ENSMUST00000176557  | 29270.046200 0.3915439130 0.179964178 2.1756769450 0.0295794250.117912431081191 | ENSMUST00000176557  | ENSMUSG000000032336 | Npntn         |
| ENSMUST00000171920  | 768.2083185 -0.37966917 0.174518155 -2.17552822 0.0295905550.117949771769964    | ENSMUST00000171920  | ENSMUSG00000006526  | Tmem110       |
| ENSMUST00000107647  | 2531.3745730 0.394311429 0.181252602 0.175484198 0.0295938500.11795588298954    | ENSMUST00000107647  | ENSMUSG000000028412 | Slc44a1       |
| ENSMUST00000142513  | 1244.989379 -0.46070096 0.211777717 -2.17539866 0.0296002540.117974379923199    | ENSMUST00000142513  | ENSMUSG000000029062 | Cdk11b        |
| ENSMUST00000174244  | 14288.51472 -0.33627533 0.154588899 -2.17528774 0.0296085590.118000453611128    | ENSMUST00000174244  | ENSMUSG000000007128 | Cct4          |
| ENSMUST00000124165  | 1432.076785 -0.37431452 0.172082337 -2.17520594 0.0296146860.118012488405671    | ENSMUST00000124165  | ENSMUSG000000030029 | Lrig1         |
| ENSMUST00000110464  | 11726.196660 0.449896324 0.206829833 2.1752003380 0.0296151060.118012488405671  | ENSMUST00000110464  | ENSMUSG000000021109 | Hif1a         |
| ENSMUST00000442938  | 6764.853348 -0.31409727 0.144408891 -2.17505492 0.0296260000.11804886960913     | ENSMUST00000442938  | ENSMUSG000000602678 | Qk            |
| ENSMUST00000004236  | 787.6067327 0.804403534 0.369857069 2.174903768 0.0296373280.11806897502221     | ENSMUST00000004236  | ENSMUSG000000040624 | Plekhhg1      |
| ENSMUST00000129962  | 4880.126331 -0.37835008 0.173968452 -2.17482007 0.0296436020.118101247503716    | ENSMUST00000129962  | ENSMUSG000000058446 | Rsl1d1        |
| ENSMUST00000138676  | 309.7003982 0.530905539 0.244115950 2.174808894 0.0296444400.118101247503716    | ENSMUST00000138676  | ENSMUSG000000003490 | Syng9         |
| ENSMUST00000175523  | 17639.87638 -0.32636061 0.150071863 -2.17469552 0.0296529400.118128078270248    | ENSMUST00000175523  | ENSMUSG00000093264  | Gm23419       |
| ENSMUST00000144514  | 3999.030868 0.392517907 0.180504844 2.174556084 0.0296633980.118148639005095    | ENSMUST00000144514  | ENSMUSG000000014514 | Ccni          |
| ENSMUST00000209554  | 3985.667450 0.292209731 0.134375913 2.174569264 0.0296624090.118148639005095    | ENSMUST00000209554  | ENSMUSG00000020628  | Trappc12      |
| ENSMUST00000167926  | 9717.530497 -0.33694545 0.145948792 -2.17456004 0.0296631000.118148639005095    | ENSMUST00000167926  | ENSMUSG00000028937  | Acot7         |
| ENSMUST00000170624  | 9714.992128 0.884184514 0.406675183 2.174178683 0.0296917180.11815533000701     | ENSMUST00000170624  | ENSMUSG00000029869  | Ephb6         |
| ENSMUST00000160022  | 100.0970844 -0.71321467 0.328004485 -2.17440525 0.0296747130.11815533000701     | ENSMUST00000160022  | ENSMUSG000000160022 | Mybl1         |
| ENSMUST00000113922  | 7978.969447 -0.35833984 0.164789805 -2.17440669 0.0296746050.11815533000701     | ENSMUST00000113922  | ENSMUSG000000035150 | Eif2s3x       |
| ENSMUST000000019163 | 6293.614147 -0.501801246 0.230785261 2.1743210230 0.0296810340.11815533000701   | ENSMUST000000019163 | NA                  | NA            |
| ENSMUST00000111381  | 454.9600372 -0.57613164 0.264990791 -2.17415723 0.0296933280.11815533000701     | ENSMUST00000111381  | ENSMUSG000000040687 | Madd          |
| ENSMUST00000075269  | 454.9600372 -0.57613164 0.264990791 -2.17415723 0.0296933280.11815533000701     | ENSMUST00000075269  | ENSMUSG00000005269  | Madd          |
| ENSMUST00000111369  | 450.4829666 -0.57361146 0.263823412 -2.17422503 0.0296882390.11815533000701     | ENSMUST00000111369  | ENSMUSG000000040687 | Madd          |
| ENSMUST00000077941  | 454.9600372 -0.57613164 0.264990791 -2.17415723 0.0296933280.11815533000701     | ENSMUST00000077941  | ENSMUSG00000007941  | Madd          |
| ENSMUST00000111372  | 454.9600372 -0.57613164 0.264990791 -2.17415723 0.0296933280.11815533000701     | ENSMUST00000111372  | ENSMUSG000000040687 | Madd          |
| ENSMUST00000111371  | 454.9600372 -0.57613164 0.264990791 -2.17415723 0.0296933280.11815533000701     | ENSMUST00000111371  | ENSMUSG000000040687 | Madd          |
| ENSMUST0000099725   | 454.9600372 -0.57613164 0.264990791 -2.17415723 0.0296933280.11815533000701     | ENSMUST0000099725   | ENSMUSG000000040687 | Madd          |
| ENSMUST00000111383  | 454.9600372 -0.57613164 0.264990791 -2.17415723 0.0296933280.11815533000701     | ENSMUST00000111383  | NA                  | NA            |
| ENSMUST00000150461  | 454.9600372 -0.57613164 0.264990791 -2.17415723 0.0296933280.11815533000701     | ENSMUST00000150461  | ENSMUSG000000040687 | Madd          |
| ENSMUST00000125321  | 454.9600372 -0.57613164 0.264990791 -2.17415723 0.0296933280.11815533000701     | ENSMUST00000125321  | ENSMUSG000000040687 | Madd          |
| ENSMUST00000154028  | 454.9600372 -0.57613164 0.264990791 -2.17415723 0.0296933280.11815533000701     | ENSMUST00000154028  | ENSMUSG000000040687 | Madd          |
| ENSMUST00000155539  | 4712.712000 0.416694311 0.191650871 2.174236462 0.0296878310.11815533000701     | ENSMUST00000155539  | ENSMUSG000000055539 | Rrbp1         |
| ENSMUST00000136520  | 38.90402403 -0.90645168 0.416927778 -2.17412159 0.0296960040.118158949416506    | ENSMUST00000136520  | ENSMUSG000000018740 | Slc25a35      |
| ENSMUST00000130737  | 5481.876588 -0.30162578 0.138777707 -2.17407214 0.0296997170.118166698672335    | ENSMUST00000130737  | ENSMUSG00000002835  | Psmb2         |
| ENSMUST00000130667  | 699.4266126 -0.41897681 0.192735662 -2.17384165 0.0297170290.118214490200725    | ENSMUST00000130667  | NA                  | NA            |
| ENSMUST00000168381  | 1038.618914 0.358092433 0.164724455 2.173887486 0.0297135860.118214490200725    | ENSMUST00000168381  | ENSMUSG00000073557  | Ppp1r12b      |
| ENSMUST00000164587  | 33908.14563 -0.56143117 0.258265358 -2.17385397 0.0297161030.118214490200725    | ENSMUST00000164587  | ENSMUSG00000024659  | Anxa1         |
| ENSMUST00000111919  | 337.0426710 0.417923571 0.192259098 2.1737518530 0.0297237760.118233497072449   | ENSMUST00000111919  | NA                  | NA            |
| ENSMUST00000030120  | 2530.2715250 0.393405913 0.180981872 2.173731031 0.0297253400.118233497072449   | ENSMUST00000030120  | NA                  | NA            |
| ENSMUST00000143439  | 5768.256964 -0.366952570 0.168829133 -2.17351450 0.0297416150.118274903171037   | ENSMUST00000143439  | ENSMUSG00000029623  | Pdap1         |
| ENSMUST00000143518  | 966.2907692 0.35003965 0.161046523 -2.17353127 0.0297403540.118274903171037     | ENSMUST00000143518  | ENSMUSG00000043518  | Kdm1b         |
| ENSMUST00000151253  | 77.34938504 -0.80989895 0.372665986 -2.17349847 0.0297428200.118274903171037    | ENSMUST00000151253  | ENSMUSG00000000884  | Gnrl1         |
| ENSMUST00000176916  | 14128.86360 0.391576325 0.180155615 2.1735449270 0.0297393280.118274903171037   | ENSMUST00000176916  | ENSMUSG000000023336 | Npntn         |
| ENSMUST00000024690  | 6370.047924 -0.49463402 0.227578365 -2.17346680 0.0297452010.118277342559288    | ENSMUST00000024690  | ENSMUSG00000024260  | Pcbp4         |
| ENSMUST00000158692  | 50.09585259 0.782227069 0.359095714 2.173422000 0.0297485550.118283650066644    | ENSMUST00000158692  | ENSMUSG000000015892 | Snord123      |
| ENSMUST00000030452  | 670.0566108 0.489218217 0.225107917 2.173260821 0.0297606920.118324877684448    | ENSMUST00000030452  | ENSMUSG000000030452 | Cdc163        |
| ENSMUST00000090212  | 5625.3118470 0.361146866 0.166195403 2.173025602 0.0297783900.118374143252091   | ENSMUST00000090212  | ENSMUSG000000090212 | Slc25a35      |
| ENSMUST00000124070  | 180.2460795 -0.52485907 0.241530154 -2.17305817 0.0297759380.118374143          |                     |                     |               |

|                    |                                                                               |                    |                     |               |
|--------------------|-------------------------------------------------------------------------------|--------------------|---------------------|---------------|
| ENSMUST00000114956 | 66.004253140.747326367.0.3442376002.1709608910.0299341280.118732264178605     | ENSMUST00000114956 | ENSMUSG00000049281  | Scn3b         |
| ENSMUST00000049941 | 66.004253140.747326367.0.3442376002.1709608910.0299341280.118732264178605     | ENSMUST00000049941 | ENSMUSG00000049281  | Scn3b         |
| ENSMUST00000176185 | 66.004253140.747326367.0.3442376002.1709608910.0299341280.118732264178605     | ENSMUST00000176185 | ENSMUSG00000049281  | Scn3b         |
| ENSMUST00000150588 | 758.4019805.0.445864590.0.205383420.2.1708889110.0299395700.118739773312603   | ENSMUST00000150588 | ENSMUSG000000505362 | Foxo4         |
| ENSMUST00000162125 | 62.81002847.0.777252754.0.35803620.2.170911394.0.0299378700.118739773316127   | ENSMUST00000162125 | ENSMUSG00000074604  | Mgst2         |
| ENSMUST00000138976 | 18.89581124.0.970520365.0.447092484.2.170737372.0.0299510300.118734535157162  | ENSMUST00000138976 | ENSMUSG000000138976 | Spock2        |
| ENSMUST00000169650 | 7690.915095.0.37829422.0.174269999.2.17072606.0.029951885.0.118747535157162   | ENSMUST00000169650 | NA                  |               |
| ENSMUST00000108355 | 428.4854265.0.51153133.0.235661781.2.17061642.0.0299601790.118803849239       | ENSMUST00000108355 | ENSMUSG00000053198  | Prx           |
| ENSMUST00000144238 | 4098.485058.0.33235943.0.153119762.2.17058485.0.029962567.0.118802815504983   | ENSMUST00000144238 | ENSMUSG00000009079  | Ewsr1         |
| ENSMUST00000113239 | 5424.090237.0.448907820.2068214102.170509460.0.0299682720.11884535852336      | ENSMUST00000113239 | ENSMUST000000113239 | Crbn          |
| ENSMUST0000013882  | 5424.090237.0.448907820.2068214102.170509460.0.0299682720.11884535852336      | ENSMUST0000013882  | ENSMUSG00000005362  | Crbn          |
| ENSMUST00000066473 | 455.1406440.0.57487498.0.264870718.2.17039840.0.0299766770.1188376378277      | ENSMUST00000066473 | ENSMUST00000066473  | Madd          |
| ENSMUST00000098644 | 423.839551.0.51618332.0.237838418.2.17031095.0.029983297.0.118845242465966    | ENSMUST00000098644 | ENSMUSG00000053198  | Prx           |
| ENSMUST00000132440 | 26.54369297.0.97164270.0.447699169.2.17030267.0.0299839240.118845242465966    | ENSMUST00000132440 | NA                  | NA            |
| ENSMUST00000044533 | 26.54369297.0.97164270.0.447699169.2.17030267.0.0299839240.118845242465966    | ENSMUST00000044533 | ENSMUSG00000036480  | Prss56        |
| ENSMUST00000087183 | 726.5254057.0.368076494.0.169600861.2.170251324.0.0299878110.118846987204952  | ENSMUST00000087183 | ENSMUST00000087183  | Stk36         |
| ENSMUST00000167482 | 537.7876968.0.73500891.0.338674778.2.17024994.0.0299879160.118846987204952    | ENSMUST00000167482 | ENSMUST00000167482  | NA            |
| ENSMUST00000013294 | 840.2218256.0.411485430.189610183.2.17016524.0.0299943290.118847273527699     | ENSMUST00000013294 | ENSMUSG00000013150  | Gfd02         |
| ENSMUST00000150011 | 139.4511285.0.704376220.324577634.2.17013172.0.0299968680.118847273527699     | ENSMUST00000150011 | ENSMUSG00000043183  | Lgfr2         |
| ENSMUST00000022099 | 2799.332334.0.39102388.0.180179557.2.17019004.0.0299924510.118847273527699    | ENSMUST00000022099 | ENSMUST00000022099  | Src1          |
| ENSMUST00000006043 | 221.6939400.0.596468252.0.2748520462.170143026.0.0299960120.118847273527699   | ENSMUST00000006043 | ENSMUSG00000006241  | Ccdc159       |
| ENSMUST00000170304 | 221.6939400.0.596468252.0.2748520462.170143026.0.0299960120.118847273527699   | ENSMUST00000170304 | ENSMUSG000000170304 | Ccdc159       |
| ENSMUST00000051416 | 47.66826213.0.86242520.0.397419759.2.17006121.0.0300022080.118854356854839    | ENSMUST00000051416 | ENSMUST00000051416  | Hnmt          |
| ENSMUST00000114498 | 47.66826213.0.86242520.0.397419759.2.17006121.0.0300022080.118854356854839    | ENSMUST00000114498 | ENSMUSG00000026986  | Hnmt          |
| ENSMUST00000159817 | 1642.590917.0.53502661.0.246551849.2.17003690.0.0300040490.118854615242185    | ENSMUST00000159817 | ENSMUSG00000026986  | Mettl13       |
| ENSMUST00000132376 | 3713.213951.0.289379802.0.133361826.2.1698848120.0300155730.11889233861906    | ENSMUST00000132376 | ENSMUSG000000132376 | Ecth1         |
| ENSMUST00000074766 | 350.965097.0.666029004.0.304309417.2.16979824.0.0300221330.118912169700942    | ENSMUST00000074766 | NA                  | NA            |
| ENSMUST00000176345 | 152.1413069.0.97245758.0.448186272.2.16976208.0.0300248740.118915987257907    | ENSMUST00000176345 | ENSMUSG00000040732  | Erg           |
| ENSMUST00000058669 | 104.8016505.0.87142309.0.401639845.2.16966296.0.0300323870.11893892681169     | ENSMUST00000058669 | ENSMUSG000000058669 | Gnat2         |
| ENSMUST00000167266 | 1152.3864290.367317968.0.169297826.2.1696555520.0300329490.11893892681169     | ENSMUST00000167266 | NA                  | NA            |
| ENSMUST00000036328 | 424.3450281.0.50213791.0.231440656.2.16961841.0.0300353760.118938002778281    | ENSMUST00000036328 | ENSMUSG000000036328 | Zfhx2         |
| ENSMUST00000156958 | 2063.4389280.369450933.0.1702920162.1695411190.0300436780.118962280858892     | ENSMUST00000156958 | ENSMUST00000156958  | Bach1         |
| ENSMUST00000037900 | 32.11200747.0.97636343.0.450077258.2.16932408.0.0300580880.118984154862981    | ENSMUST00000037900 | ENSMUST00000037900  | Cpn7e         |
| ENSMUST00000159797 | 13.05071534.0.98042767.0.451940652.2.16937262.0.0300544050.118984154862981    | ENSMUST00000159797 | ENSMUST00000159797  | Lmo7          |
| ENSMUST00000135400 | 529.8600847.0.57700608.0.265976943.2.16938385.0.0300535530.118984154862981    | ENSMUST00000135400 | ENSMUST00000135400  | Actl6a        |
| ENSMUST00000135660 | 4442.881376.0.46037223.0.212216049.2.16935635.0.0300556390.118984154862981    | ENSMUST00000135660 | ENSMUSG00000028455  | Stoml2        |
| ENSMUST00000151041 | 2491.132916.0.44050488.0.203059709.2.16933670.0.0300571300.118984154862981    | ENSMUST00000151041 | ENSMUST00000151041  | Cap1          |
| ENSMUST00000134049 | 1974.804041.0.39051039.0.180020910.2.16925020.0.0300636930.11899303256937     | ENSMUST00000134049 | ENSMUSG00000037916  | Ndufv1        |
| ENSMUST00000140838 | 8978.2572980.341582463.0.157480604.2.169046550.0300729230.119054012134605     | ENSMUST00000140838 | ENSMUST00000140838  | Ifi27         |
| ENSMUST00000050581 | 64.66113065.0.664140033.0.306204477.2.168942920.0.0300870170.1191307540053821 | ENSMUST00000050581 | ENSMUSG00000050581  | Gm5069        |
| ENSMUST00000155056 | 85.10775006.0.804214036.0.370824581.2.1687182470.0301040801.1191380271608137  | ENSMUST00000155056 | ENSMUSG000000155056 | Cagn5         |
| ENSMUST00000145913 | 3229.2359120.579669522.0.2672939182.1686595970.0301085360.1191486145337332    | ENSMUST00000145913 | ENSMUSG00000032531  | Amtot2        |
| ENSMUST00000124166 | 104.38478180.560242669.0.258347732.2.1685604240.0301160720.119171387791088    | ENSMUST00000124166 | ENSMUST00000124166  | Junos         |
| ENSMUST00000118960 | 57.205060790.871468235.0.401887772.2.168436800.0.0301254680.11920151893501    | ENSMUST00000118960 | ENSMUSG00000090236  | Car15         |
| ENSMUST00000106048 | 708.5812495.0.4128331130.1590386562.2.1683941780.0301287080.119202733134794   | ENSMUST00000106048 | ENSMUSG000000106048 | Sirt3         |
| ENSMUST00000042614 | 1990.6502270.438964062.0.2024411872.1683535220.0301317990.119202733134794     | ENSMUST00000042614 | ENSMUSG00000042614  | Gm15800       |
| ENSMUST00000124379 | 3877.695546.289884623.0.1336911572.168315606.0.0301346801.119202733134794     | ENSMUST00000124379 | ENSMUST00000124379  | Arcp1a        |
| ENSMUST00000137542 | 5500.8102130.3660063740.168795420.2.1683430390.0301325960.119202733134794     | ENSMUST00000137542 | ENSMUST00000137542  | Snrk1         |
| ENSMUST00000150468 | 269.8401064.0.565469697.0.260785285.2.1683343700.0301325550.119202733134794   | ENSMUST00000150468 | ENSMUSG000000150468 | Ctns          |
| ENSMUST00000137269 | 129.2894322.0.57234620.2.168366080.2.16825662.0.0301391660.119213426229339    | ENSMUST00000137269 | ENSMUSG00000028621  | Cyb5r1        |
| ENSMUST00000144056 | 821.5069314.0.48115060.0.221932338.2.16800582.0.0301582430.119274783764231    | ENSMUST00000144056 | ENSMUST00000144056  | Ino80e        |
| ENSMUST00000152687 | 298.0583939.6131081100.2827972062.1680133170.0301576730.119274783764231       | ENSMUST00000152687 | ENSMUSG00000042333  | Tnfrsf14      |
| ENSMUST00000119912 | 2122.284231.0.313341090.144536909.2.16789674.0.0301665430.11930558766712      | ENSMUST00000119912 | ENSMUST00000119912  | Gemin7        |
| ENSMUST00000147246 | 471.1353077.0.427727993.0.197348257.2.16738641.0.0302054020.119447176040628   | ENSMUST00000147246 | ENSMUSG00000005574  | Tomm40l       |
| ENSMUST00000122946 | 1151.890333.0.40752458.0.188048938.2.16711986.0.0302257150.11952044689836     | ENSMUST00000122946 | ENSMUST00000122946  | Ict1          |
| ENSMUST00000159732 | 565.6206110.4101925860.1892896562.1670100410.0302340880.119531805848484       | ENSMUST00000159732 | ENSMUSG00000029413  | Naae          |
| ENSMUST00000161179 | 36.91127859.0.881365580.406715511.2.16703214.0.0302342402.119531805848484     | ENSMUST00000161179 | ENSMUST00000161179  | Phit          |
| ENSMUST00000202357 | 51.53823532.0.94262804.0.434994493.2.16698845.0.0302357340.119531805848484    | ENSMUST00000202357 | ENSMUSG00000023537  | Eaf2          |
| ENSMUST00000142984 | 3455.207415.0.33373659.0.154004817.2.16705293.0.0302380180.119531805848484    | ENSMUST00000142984 | ENSMUSG00000142984  | Hdac1         |
| ENSMUST00000172087 | 3468.590911.0.33778237.0.155880140.2.16693654.0.0302396920.11953330551179     | ENSMUST00000172087 | NA                  | NA            |
| ENSMUST00000164574 | 2201.970116.0.32094070.0.148106745.2.16695534.0.0302382590.11953330551179     | ENSMUST00000164574 | ENSMUSG00000090553  | Snrpe         |
| ENSMUST00000123897 | 76.49150813.0.75741278.0.349544194.2.16685842.0.0302456500.1195498203223      | ENSMUST00000123897 | ENSMUST00000123897  | Lrp4          |
| ENSMUST00000102573 | 784.4385725.0.34011300.0.156964744.2.16681144.0.0302492340.119549863444771    | ENSMUST00000102573 | ENSMUST00000102573  | NA            |
| ENSMUST00000125227 | 453.9132574.0.57478034.0.265263803.2.16682540.0.0302481690.119549863444771    | ENSMUST00000125227 | ENSMUSG00000040687  | Madd          |
| ENSMUST00000067929 | 8522.305699.0.30298325.0.139843121.2.16659388.0.0302658340.119608403814226    | ENSMUST00000067929 | ENSMUST00000067929  | Far1          |
| ENSMUST00000042497 | 6026.308691.0.359442180.165905773.2.166544130.0302696310.11960924396118       | ENSMUST00000042497 | ENSMUST00000042497  | Ndufv1        |
| ENSMUST00000067194 | 8164.451065.0.4098153860.1891547892.166560986.0.0302683440.11960924396118     | ENSMUST00000067194 | NA                  | NA            |
| ENSMUST00000086374 | 51.702072330.7108813880.3281211862.1665208390.0302714090.11960924396118       | ENSMUST00000086374 | ENSMUSG00000086374  | Cdkn2d        |
| ENSMUST00000044217 | 2340.554504.0.47237651.0.218052860.2.16633946.0.0302852560.11964985222347     | ENSMUST00000044217 | ENSMUST00000044217  | Syme2         |
| ENSMUST00000122905 | 9024.994100.0.3415052880.1576441782.1663044730.0302879280.11964985222347      | ENSMUST00000122905 | ENSMUST00000122905  | Ifi27         |
| ENSMUST00000108485 | 59.90278316.0.92844214.0.428585761.2.16629255.0.0302888380.11964985222347     | ENSMUST00000108485 | ENSMUST00000108485  | Atp2a3        |
| ENSMUST00000108484 | 59.90278316.0.92844214.0.428585761.2.16629255.0.0302888380.11964985222347     | ENSMUST00000108484 | ENSMUST00000108484  | Atp2a3        |
| ENSMUST00000027414 | 1344.975983.0.426348671.0.196818612.2.1662009830.0302958320.11966335078824    | ENSMUST00000027414 | ENSMUSG00000026213  | Stk11ip       |
| ENSMUST00000068243 | 1169.988899.0.354815864.0.163794754.2.1662223920.0302941960.11966335078824    | ENSMUST00000068243 | ENSMUSG00000054942  | Fam73a        |
| ENSMUST00000129280 | 311.7945041.0.617305110.284975604.2.16616826.0.0302983310.1196661595577341    | ENSMUST00000129280 | ENSMUST00000129280  | Nubp1         |
| ENSMUST00000124113 | 3214.1816270.344115086.0.158868718.2.1660442500.0303085600.119692717627205    | ENSMUST00000124113 | ENSMUSG00000124113  | O230025D16Rik |
| ENSMUST00000165231 | 64.16982040.0.807143316.0.3726365932.1660334230.0303086320.119692717627205    | ENSMUST00000165231 | ENSMUSG00000038060  | Dlec1         |
| ENSMUST00000140003 | 110.4176408.0.95957847.0.443019580.2.16599563.0.0303112060.11970857942321     | ENSMUST00000140003 | ENSMUST00000140003  | BC037032      |
| ENSMUST00000136493 | 368.2624610.4243965700.1959415702.1659343100.0303162070.119708499475522       | ENSMUST00000136493 | ENSMUSG00000029101  | Rgs12         |
| ENSMUST00000058075 | 2493.602363.0.33927381.0.156650805.2.16579681.0.0303267160.119708499475522    | ENSMUST00000058075 | ENSMUST00000068975  | Zfp180        |
| ENSMUST00000167720 | 2922.407217.0.38249411.0.176604889.2.16581836.0.0303250690.119728803192472    | ENSMUST00000167720 | ENSMUST00000167720  | NA            |
| ENSMUST00000144445 | 1866.717923.0.289984860.133892057.2.16581076.0.0303256500.119728803192472     | ENSMUST00000144445 | ENSMUSG00000014301  | Pam16         |
| ENSMUST00000168718 | 1668.8734840.391824844.0.180916965.2.1657716980.0303286370.11972931774073     | ENSMUST00000168718 | ENSMUSG00000024811  | Tnks2         |
| ENSMUST00000112818 | 9783.806940.0.426924130.197125690.2.1                                         |                    |                     |               |

|                     |                                                                                    |                     |                        |          |
|---------------------|------------------------------------------------------------------------------------|---------------------|------------------------|----------|
| ENSMUST00000149337  | 1270.460895 -0.48915258;0.226089603 -2.16353418 0.0305001170.120164523894266       | ENSMUST00000149337  | ENSMUSG000000039768    | Dnajc11  |
| ENSMUST00000152894  | 27328.52917 -0.516660660.238843918 -2.16317276 0.0305278940.120232218436111        | ENSMUST00000152894  | ENSMUST000000040463    | Mybbp1a  |
| ENSMUST00000045633  | 27328.52917 -0.516660660.238843918 -2.16317276 0.0305278940.120232218436111        | ENSMUST00000045633  | ENSMUSG000000040463    | Mybbp1a  |
| ENSMUST00000136843  | 7211.465806 -0.28438507;0.131463360 -2.16322685 0.0305237350.120232218436111       | ENSMUST00000136843  | ENSMUST000000028798    | Eif3p1   |
| ENSMUST00000150871  | 615.2141249 0.349695677;0.161659104 2.163172802 0.030527891 0.120232218436111      | ENSMUST00000150871  | ENSMUSG000000039671    | Zmynd8   |
| ENSMUST00000137833  | 2150.502960 -0.34643211;0.160153424 -2.16312647 0.0305314530.120239159807347       | ENSMUST00000137833  | ENSMUST000000013783    | Sgpl1    |
| ENSMUST000000662182 | 28.68707994 0.885801533 0.409517699 2.1630360140 0.0305384090.12025947755638       | ENSMUST000000662182 | ENSMUSG00000072974     | Gm4787   |
| ENSMUST00000033010  | 242.1508167 -0.65533565;0.302983030 -2.16294506 0.0305454005 0.120279946373035     | ENSMUST00000033010  | ENSMUST0000000033010   | Kdm8     |
| ENSMUST00000095263  | 9650.096320 0.300408303 0.138895976 2.1628294140 0.0305543010.120306782883569      | ENSMUST00000095263  | ENSMUSG00000071074     | Yipf3    |
| ENSMUST00000101655  | 1796.574176 0.348636683;0.161179728 2.162786380 0.0305576102 0.1203306782883569    | ENSMUST00000101655  | ENSMUST0000000101655   | Sfl1     |
| ENSMUST00000134081  | 4261.926752 -0.273088390 0.126265756 -2.16280642 0.0305560710 0.120306782883569    | ENSMUST00000134081  | ENSMUSG00000027455     | Nsf11c   |
| ENSMUST00000132972  | 292.4775965 0.491307861 0.227169040 2.1627412780 0.0305610840.120313368533003      | ENSMUST00000132972  | ENSMUST0000000132972   | Cebrf1   |
| ENSMUST00000159316  | 620.4914065 -0.58085498;0.268603094 -2.162502970 0.0305794280.120378503950148      | ENSMUST00000159316  | ENSMUSG00000026694     | Mettl13  |
| ENSMUST00000165107  | 94.97829133 0.753915958 0.348639389 2.1624520410 0.0305833490.12038685936157       | ENSMUST00000165107  | NA                     | NA       |
| ENSMUST000000001126 | 1012.598470 0.417813973 0.193239822 2.162152536 0.0306064200.120470587286198       | ENSMUST000000001126 | ENSMUSG000000020829    | Sic46a1  |
| ENSMUST00000095259  | 1815.505763 -0.42643267 0.197237106 -2.16203066 0.0306158120.120496825263146       | ENSMUST00000095259  | ENSMUST0000000095259   | Gtpbp3   |
| ENSMUST00000144648  | 157.8457867 -0.71455453;0.330503310 -2.16201930 0.0306166870 0.120496825263146     | ENSMUST00000144648  | ENSMUSG000000038685    | Rtel1    |
| ENSMUST00000110124  | 6793.515830 -0.31717849 0.146711781 -2.16191563 0.0306246790.120521188854622       | ENSMUST00000110124  | ENSMUST000000000110124 | Home3    |
| ENSMUST00000072838  | 2919.100425 -0.38200995 0.176708489 -2.16180872 0.0306329220 0.120539452142811     | ENSMUST00000072838  | ENSMUSG00000022556     | Hsf1     |
| ENSMUST00000021592  | 992.1273171 -0.55619003;0.257279900 -2.16180912 0.0306328920 0.120539452142811     | ENSMUST00000021592  | ENSMUST000000021592    | Cdc47i   |
| ENSMUST00000106644  | 18017.28536 -0.34036742 0.157448449 -2.16177056 0.0306358605 0.120543942288546     | ENSMUST00000106644  | ENSMUST00000006644     | Nrd1     |
| ENSMUST00000137602  | 2756.678425 0.293756623 0.135888646 2.161745155 0.0306378250 0.120544556753605     | ENSMUST00000137602  | ENSMUSG000000049550    | Crlp1    |
| ENSMUST00000164680  | 1522.857969 -0.46344084;0.214392888 -2.16164283 0.0306457170 0.120568528967448     | ENSMUST00000164680  | ENSMUST000000064680    | Gpaal1   |
| ENSMUST00000003669  | 6792.590210 0.31699265 0.146654497 -2.16149289 0.0306572850 0.120646948904062      | ENSMUST00000003669  | ENSMUSG00000003669     | Home3    |
| ENSMUST00000110855  | 12308.847540 0.296178804 0.137040169 2.1612553790 0.0306756170 0.1206719758718     | ENSMUST00000110855  | ENSMUST000000010855    | Lgpl1    |
| ENSMUST00000133331  | 176.1794863 0.755320701 0.349487224 2.1612254980 0.0306779240 0.120673957463369    | ENSMUST00000133331  | ENSMUSG00000020866     | Cacna1g  |
| ENSMUST00000166213  | 221.4362945 0.593983523 0.274862915 2.1610173330 0.0306940000 0.120730906131527    | ENSMUST00000166213  | NA                     | NA       |
| ENSMUST00000159358  | 896.6630940 -0.39196770 0.181387273 -2.16094383 0.0306996780 0.120731140361682     | ENSMUST00000159358  | ENSMUSG00000023832     | Acat2    |
| ENSMUST00000166744  | 2894.553006 0.364748653 0.168791330 2.1609442410 0.0306996460 0.120731140361682    | ENSMUST00000166744  | ENSMUST0000000166744   | Ppard    |
| ENSMUST00000066674  | 235.208555 -0.96040764 0.444436852 -2.16095411 0.0306988680 0.120731140361682      | ENSMUST00000066674  | ENSMUSG000000041261    | Car8     |
| ENSMUST00000127645  | 2091.400696 -0.57707972 0.267052934 -2.16091888 0.0307010500 0.120731625615111     | ENSMUST00000127645  | ENSMUST0000000127645   | Stoml2   |
| ENSMUST00000025273  | 8170.9435740 0.407857639 0.188766221 2.1606494860 0.0307224250 0.120806397937664   | ENSMUST00000025273  | ENSMUSG00000024807     | Symn1    |
| ENSMUST00000142647  | 225.63200210 0.632121917 0.292574366 2.1605512620 0.030730012891 0.120829158953601 | ENSMUST00000142647  | ENSMUST0000000142647   | Rif1     |
| ENSMUST00000145039  | 167.7202749 -0.63113927 0.292138726 -2.16040949 0.0307409830 0.120856361193031     | ENSMUST00000145039  | ENSMUST0000000145039   | Erc2c    |
| ENSMUST00000148393  | 717.4849794 -0.42943226 0.198775185 -2.16039174 0.0307423560 0.120856361193031     | ENSMUST00000148393  | ENSMUSG0000000148393   | Tmem99   |
| ENSMUST00000048623  | 1163.903883 0.306713587 0.141970382 2.1604061120 0.0307412440 0.120856361193031    | ENSMUST00000048623  | NA                     | NA       |
| ENSMUST00000155230  | 2938.129338 -0.382594005 0.177101587 -2.16030845 0.0307487980 0.120874588470462    | ENSMUST00000155230  | ENSMUSG0000000155230   | Fam149a  |
| ENSMUST00000171220  | 390.4007532 -0.59666345 0.276202795 -2.16023684 0.0307543390 0.12088926726104      | ENSMUST00000171220  | NA                     | NA       |
| ENSMUST00000069330  | 220.3327707 0.730164782 0.338026992 2.1600783340 0.0307666005 0.1209303800851617   | ENSMUST00000069330  | ENSMUSG000000069330    | Acp5     |
| ENSMUST00000144531  | 1805.984555 -0.34829632 0.161248146 -2.16000206 0.0307725090 0.120946481919224     | ENSMUST00000144531  | ENSMUST0000000144531   | Naa38    |
| ENSMUST00000134479  | 6003.488761 -0.35802820 0.165775867 -2.15971243 0.0307949380 0.121017702979879     | ENSMUST00000134479  | ENSMUST0000000134479   | Ndufv1   |
| ENSMUST00000168021  | 2268.939410 -0.31114189 0.144067561 -2.15969431 0.0307963410 0.121017702979879     | ENSMUST00000168021  | NA                     | NA       |
| ENSMUST00000176418  | 593.18705120 0.574059001 0.265804468 2.1597041010 0.0307958310 0.121017702979879   | ENSMUST00000176418  | ENSMUSG000000028487    | Bnc2     |
| ENSMUST00000140934  | 568.630330 0.3139203140 0.145352385 2.1597190430 0.0307944260 0.121017702979879    | ENSMUST00000140934  | ENSMUSG000000013465    | Nelfb    |
| ENSMUST00000022343  | 2593.2818092 0.337070103 0.156078222 2.1596229040 0.0308018730 0.121019245790603   | ENSMUST00000022343  | ENSMUST000000022343    | Nudt13   |
| ENSMUST00000121798  | 157.7083820 0.5383472930 0.249277467 2.1596307850 0.0308012630 0.121019245790603   | ENSMUST00000121798  | ENSMUSG000000082765    | Gm14411  |
| ENSMUST00000095232  | 1926.078200 0.477449535 0.221083589 2.159588310 0.0308045540 0.12102267098643      | ENSMUST00000095232  | ENSMUST000000092532    | Nfia     |
| ENSMUST00000121095  | 62.53546651 -0.86570242 0.400882864 -2.15948972 0.0308121930 0.121045578148794     | ENSMUST00000121095  | ENSMUSG000000035509    | Fbxl21   |
| ENSMUST00000125781  | 1252.659670 -0.48064202 0.222597757 -2.15924020 0.0308315360 0.12114454848833      | ENSMUST00000125781  | NA                     | NA       |
| ENSMUST00000160885  | 1309.513912 -0.68436396 0.316963113 -2.15912809 0.0308402300 0.12114454848833      | ENSMUST00000160885  | ENSMUSG0000000505410   | Tcf19    |
| ENSMUST00000132597  | 2005.407510 0.351225521 0.162672446 2.1590965680 0.0308426750 0.121143991480492    | ENSMUST00000132597  | ENSMUST0000000132597   | Dlg4     |
| ENSMUST00000050785  | 14495.157290 0.4407752860 0.204159245 2.158977838 0.0308518860 0.121173055819179   | ENSMUST00000050785  | ENSMUSG000000026822    | Lcn2     |
| ENSMUST00000134132  | 715.3575148 -0.507966800 0.235287764 -2.15891719 0.0308565910 0.121183662795592    | ENSMUST00000134132  | ENSMUST0000000134132   | Mrps25   |
| ENSMUST00000127804  | 1068.726407 0.3639236140 0.168569981 2.1588874260 0.0308589010 0.121183662795592   | ENSMUST00000127804  | ENSMUST0000000127804   | Pgap2    |
| ENSMUST00000092567  | 1947.518964 -0.35594951 0.164877466 -2.15887301 0.0308600190 0.121183662795592     | ENSMUST00000092567  | ENSMUST000000092567    | Gjc1     |
| ENSMUST00000170458  | 14500.29908 0.3336235360 0.154550288 2.158673016 0.0308755430 0.121237508829333    | ENSMUST00000170458  | NA                     | NA       |
| ENSMUST00000057982  | 2509.0108240 0.457347747 0.211874321 2.1585803530 0.0308827380 0.121258644728599   | ENSMUST00000057982  | ENSMUST000000057982    | NA       |
| ENSMUST00000021941  | 2229.959330 0.3078431140 0.142616473 2.1585382550 0.0308860070 0.12126435392715    | ENSMUST00000021941  | ENSMUSG000000021485    | Mxd3     |
| ENSMUST00000145134  | 136.31880120 0.5245783460 0.243031613 2.1584778160 0.0308907010 0.121275679153347  | ENSMUST00000145134  | ENSMUST0000000145134   | Ganc     |
| ENSMUST00000128747  | 1337.2226150 0.331207627 0.153458944 2.1582816770 0.0309059380 0.121328381080764   | ENSMUST00000128747  | ENSMUSG000000031494    | R3hcc1   |
| ENSMUST00000148472  | 355.9016715 0.4419745180 0.204794194 2.1581398860 0.0309169570 0.1213645192343696  | ENSMUST00000148472  | ENSMUST0000000148472   | Dmpk     |
| ENSMUST00000131651  | 706.7991660 -0.42716548 0.197934430 -2.15811611 0.0309188050 0.12136453985118      | ENSMUST00000131651  | ENSMUSG000000025722    | Wdr73    |
| ENSMUST00000084852  | 14496.37638 0.333385445 0.154482487 2.1580792160 0.0309216730 0.12136879213736     | ENSMUST00000084852  | ENSMUST000000084852    | Numa1    |
| ENSMUST00000115091  | 1993.277826 -0.32625344 0.151185415 -2.15796902 0.0309302400 0.121395296219137     | ENSMUST00000115091  | ENSMUST0000000115091   | Chchd3   |
| ENSMUST00000171981  | 1123.386976 0.674837771 0.312728246 2.1579047590 0.0309352370 0.121400669423956    | ENSMUST00000171981  | ENSMUST0000000171981   | NA       |
| ENSMUST00000154521  | 63.56888240 0.880351146 0.407964951 2.1579087710 0.0309349250 0.121400669423956    | ENSMUST00000154521  | ENSMUST0000000154521   | Bmf      |
| ENSMUST00000132797  | 675.0726040 0.525868305 0.243706277 2.1577954880 0.0309437350 0.12142349569485     | ENSMUST00000132797  | ENSMUST0000000132797   | Heg1     |
| ENSMUST00000136125  | 2779.881288 -0.40073554 0.199619114 -2.15778706 0.0309434930 0.121422349569485     | ENSMUST00000136125  | ENSMUSG000000036125    | Tpm3     |
| ENSMUST00000093360  | 14305.53082 -0.28776362 0.133362764 -2.15775089 0.0309472040 0.121426268681265     | ENSMUST00000093360  | ENSMUST000000093360    | Tnpo2    |
| ENSMUST00000079949  | 17174.97438 -0.36218889 0.167858153 -2.15770806 0.0309505360 0.121432249429413     | ENSMUST00000079949  | ENSMUST000000079949    | Ewsr1    |
| ENSMUST00000045620  | 919.8273215 -0.409795680 0.189924180 -2.15768042 0.0309526860 0.121433540298783    | ENSMUST00000045620  | ENSMUST000000045620    | Smco4    |
| ENSMUST00000171076  | 16.97357284 -0.97878384 0.453651697 -2.15756681 0.0309615270 0.1214617210376       | ENSMUST00000171076  | ENSMUST0000000171076   | Inpp4b   |
| ENSMUST00000132718  | 9211.835340 0.720385570 0.333894196 2.1575264780 0.0309646660 0.121466295685203    | ENSMUST00000132718  | ENSMUSG0000000132718   | Ctsh     |
| ENSMUST00000139368  | 1032.320545 -0.338845170 0.157055137 -2.15749184 0.0309673610 0.121469748747299    | ENSMUST00000139368  | ENSMUST0000000139368   | Arfp1    |
| ENSMUST00000173487  | 104.1790630 0.671122957 0.311085643 2.1573575350 0.0309778170 0.121466517017793    | ENSMUST00000173487  | ENSMUST0000000173487   | Mtmr7    |
| ENSMUST00000129945  | 2553.006094 0.417986010 0.193748693 -2.157363173 0.0309774900 0.121469517017793    | ENSMUST00000129945  | ENSMUST0000000129945   | Myef2    |
| ENSMUST00000120274  | 792.8732540 0.799375161 0.370569630 2.1571523820 0.0309937930 0.121552051682593    | ENSMUST00000120274  | ENSMUST0000000120274   | Plekhhg1 |
| ENSMUST00000021036  | 1211.831746 0.452181225 0.209626327 2.1570822340 0.0309992570 0.12156357128959     | ENSMUST00000021036  | ENSMUSG000000021036    | Rffl     |
| ENSMUST00000086688  | 4284.943680 0.360362849 0.170681402 2.156981266 0.0310071240 0.121580087763505     | ENSMUST00000086688  | NA                     | NA       |
| ENSMUST00000167480  | 491.9837622 -0.351511740 0.162965725 -2.15696733 0.0310082090 0.121580087763505    | ENSMUST00000167480  | ENSMUST0000000167480   | Nf2      |
| ENSMUST00000132031  | 966.8706364 -0.39363402 0.182492192 -2.15699101 0.0310063640 0.121580087763505     | ENSMUST00000132031  | ENSMUSG000000061136    | Prpf40a  |
| ENSMUST00000163442  | 86.                                                                                |                     |                        |          |

|                    |                                                                                |                    |                     |               |
|--------------------|--------------------------------------------------------------------------------|--------------------|---------------------|---------------|
| ENSMUST0000034983  | 11364.70940 -0.43361205/0.201332907 -2.15370684 0.0312631690.122307440039317   | ENSMUST0000034983  | ENSMUSG00000032412  | Atp1b3        |
| ENSMUST00000145357 | 395.27861850.5001555380.2322395282.1536193270.0312700370.122327115748006       | ENSMUST00000145357 | ENSMUSG000000024163 | Mapk8ip3      |
| ENSMUST00000110168 | 6082.086847.0.3314061100.1538957552.1534454270.0312836880.12237340719056       | ENSMUST00000110168 | ENSMUSG00000022361  | Zhh1          |
| ENSMUST00000124966 | 387.6114190 -0.574702400.0266879628 -2.15341426 0.0312861350.122375824261272   | ENSMUST00000124966 | ENSMUSG000000024672 | Myo10         |
| ENSMUST0000046513  | 347.0804109 -0.585993540.0272126360 -2.15338766 0.0312882240.122376842858705   | ENSMUST0000046513  | ENSMUSG000000327747 | Phyhlip       |
| ENSMUST00000129201 | 188.1520740 -0.609879820.0283252840 -2.153128730.0313085620.1224492350283167   | ENSMUST00000129201 | ENSMUSG00000055900  | Themel69      |
| ENSMUST00000170875 | 1966.121949 -0.472374650.0219397736 -2.15305163 0.0313146210.1224657171082623  | ENSMUST00000170875 | NA                  | NA            |
| ENSMUST00000127014 | 123.9682568 -0.926571330.0430362735 -2.15300084 0.0313186120.1224691137177299  | ENSMUST00000127014 | ENSMUSG00000001281  | Itgb7         |
| ENSMUST00000021390 | 1306.7683040.3608164740.1675882252.1529941800.0313191310.1224691137177299      | ENSMUST00000021390 | ENSMUSG00000021003  | Galc          |
| ENSMUST0000050519  | 1115.8372400.6082237810.02825151742.1528888920.0313274110.122494313668271      | ENSMUST0000050519  | ENSMUST00000087701  | Elfrn1        |
| ENSMUST00000142560 | 93.70551279 -0.791897520.367838434 -2.15284062 0.0313312060.1225019953322      | ENSMUST00000142560 | ENSMUSG00000034317  | Trim59        |
| ENSMUST00000887701 | 628.4758665 -0.607199300.0282088940 -2.15251015 0.0313571960.122586129461442   | ENSMUST00000887701 | ENSMUST000000087701 | Mfsd6         |
| ENSMUST00000170830 | 8435.352064 -0.44786596 0.208068086 -2.15249714 0.0313582190.122586129461442   | ENSMUST00000170830 | NA                  | NA            |
| ENSMUST00000102930 | 16911.09352 -0.36318098.0.168725360 -2.15249788 0.0313581610.122586129461442   | ENSMUST00000102930 | ENSMUSG00000009079  | Ewsr1         |
| ENSMUST00000166310 | 232.0368003.0563454601.02617867232.1523421550.0313704150.122612317782882       | ENSMUST00000166310 | NA                  | NA            |
| ENSMUST00000129162 | 1501.723371 -0.369403540.0171625593 -2.15238026 0.0313674160.122612317782882   | ENSMUST00000129162 | ENSMUSG00000048497  | Mmgt2         |
| ENSMUST00000097946 | 115.8052504 -0.930640740.432384914 -2.15234323 0.0313703310.122612317782882    | ENSMUST00000097946 | NA                  | NA            |
| ENSMUST00000027040 | 9148.4549940.4901132030.12277534312.1519465100.0314015670.12276908361849       | ENSMUST00000027040 | ENSMUSG00000025907  | Rb1cc1        |
| ENSMUST00000156939 | 205.4194071 -0.481329840.0223684776 -2.15182210 0.0314113680.1227580404777     | ENSMUST00000156939 | ENSMUSG00000017697  | Ada           |
| ENSMUST00000112236 | 13717.564330.7127506180.0312496382.1517023280.0314208060.122780586157526       | ENSMUST00000112236 | NA                  | NA            |
| ENSMUST00000112229 | 13717.564330.7127506180.0312496382.1517023280.0314208060.122780586157526       | ENSMUST00000112229 | ENSMUSG00000031342  | Gpm6b         |
| ENSMUST00000125886 | 6970.319310 -0.418872770.0194685290 -2.15153788 0.0314337760.122824064921433   | ENSMUST00000125886 | NA                  | NA            |
| ENSMUST00000136651 | 278.3700154 -0.542861270.0252318695 -2.15149050 0.0314375040.1228314882293094  | ENSMUST00000136651 | ENSMUSG00000027993  | Trim2         |
| ENSMUST00000118410 | 5194.860666 -0.345307160.0160850875 -2.15132622 0.0314504590.122874934555832   | ENSMUST00000118410 | ENSMUSG00000027531  | Impa1         |
| ENSMUST00000109285 | 3665.6901820.4897274110.2276473892.1512542420.0314561370.1228899423661384      | ENSMUST00000109285 | NA                  | NA            |
| ENSMUST00000133979 | 736.7029207 -0.421781900.0196067972 -2.151202450.0314602230.122897852833178    | ENSMUST00000133979 | ENSMUSG00000025722  | Wdr73         |
| ENSMUST00000041364 | 7362.941941 -0.369008920.0171537750 -2.15118201 0.0314618350.122897852833178   | ENSMUST00000041364 | ENSMUSG00000036693  | Nop14         |
| ENSMUST00000124792 | 405.71056990.4502884300.2093253152.1511417690.0314650110.122903084188334       | ENSMUST00000124792 | ENSMUSG00000085885  | Gm11906       |
| ENSMUST00000149969 | 1371.374285 -0.345119150.0160440317 -2.15107502 0.0314702780.122916481955683   | ENSMUST00000149969 | ENSMUSG00000027569  | Mrghbp        |
| ENSMUST00000134070 | 1309.269457 -0.416503340.0193628727 -2.151041070.0314729580.122919747281521    | ENSMUST00000134070 | ENSMUSG00000030541  | Idh2          |
| ENSMUST00000133252 | 1889.467397 -0.39998586.0185956682 -2.15096259 0.0314791250.122922444031123    | ENSMUST00000133252 | ENSMUSG00000067194  | Eif1ax        |
| ENSMUST00000154584 | 16242.85969 -0.302663420.1400707779 -2.15100708 0.0314756400.122922444031123   | ENSMUST00000154584 | ENSMUSG00000055672  | Eef1d         |
| ENSMUST00000155652 | 14.62570405 -0.974765360.0453175098 -2.15096850 0.0314786850.122922444031123   | ENSMUST00000155652 | ENSMUSG00000039167  | Adgrl4        |
| ENSMUST00000068933 | 1926.466022 -0.357139940.0166040995 -2.15091428 0.0314829650.122930162045993   | ENSMUST00000068933 | ENSMUSG00000034520  | Gjc1          |
| ENSMUST00000151081 | 1107.649474 -0.53981431.0.250989008 -2.15074881 0.0314960310.12294001725275    | ENSMUST00000151081 | ENSMUSG00000004642  | Silpb         |
| ENSMUST00000144530 | 613.40590970.3476467360.1616419372.1507211640.0314982140.12297535245487        | ENSMUST00000144530 | ENSMUSG00000039671  | Zmynd8        |
| ENSMUST00000139356 | 126.52262250.5625607590.2615746532.150669950.0315022560.122983955600431        | ENSMUST00000139356 | ENSMUSG00000087177  | E130307A14Rik |
| ENSMUST00000071512 | 4450.7193720.3254624710.1513333162.1506333110.0315051530.122988092878232       | ENSMUST00000071512 | NA                  | NA            |
| ENSMUST00000127828 | 32.87203569 -0.97644868.0.454054100 -2.15051175 0.0315147560.12301840398329    | ENSMUST00000127828 | ENSMUSG000000048120 | Entpd1        |
| ENSMUST00000142871 | 63.01348243 -0.767187290.0356756665 -2.150449790.0315196530.123020702252357    | ENSMUST00000142871 | ENSMUSG00000087611  | 4930458D05Rik |
| ENSMUST00000138556 | 962.6572133 -0.489911290.0227816475 -2.15046471 0.0315184740.123020702252357   | ENSMUST00000138556 | ENSMUSG00000138556  | Tsfm          |
| ENSMUST00000126707 | 2010.2267210.9761476540.4539304252.1504345130.0315208600.123020702252357       | ENSMUST00000126707 | ENSMUSG00000028965  | Tnfrsf9       |
| ENSMUST00000143965 | 20423.96635 -0.332515440.0154628793 -2.15041088 0.0315227280.123020815269465   | ENSMUST00000143965 | ENSMUSG00000136948  | Calm2         |
| ENSMUST0000040833  | 368.6711110.3623819740.1685332652.1502103620.0315385780.123075496719416        | ENSMUST0000040833  | ENSMUSG00000038312  | Edem2         |
| ENSMUST00000136171 | 288.01229140.4663361550.02168850142.1501538840.0315430440.12308754787602       | ENSMUST00000136171 | ENSMUSG00000036171  | Paqr7         |
| ENSMUST00000148499 | 199.6682010.7837852940.3645312252.1501183970.0315458500.123095818174228        | ENSMUST00000148499 | ENSMUSG00000031400  | Gabre         |
| ENSMUST00000176482 | 1415.2213170.3461208370.01609854952.1500125600.0315542210.123115000821008      | ENSMUST00000176482 | ENSMUSG00000052534  | Pbx1          |
| ENSMUST00000112227 | 14149.416870.7142947260.3322318102.1499889630.0315560870.123115105165181       | ENSMUST00000112227 | ENSMUSG00000031342  | Gpm6b         |
| ENSMUST0000079913  | 10466.154490.3263057220.1517756672.1499211810.0315614490.123128846224919       | ENSMUST0000079913  | NA                  | NA            |
| ENSMUST00000161233 | 2897.084708 -0.266330860.0123881182 -2.14988955 0.0315639510.1231342909465     | ENSMUST00000161233 | ENSMUSG00000037720  | Tmem33        |
| ENSMUST00000021991 | 1748.505771 -0.438188880.0203828396 -2.14979313 0.0315715810.123154011548952   | ENSMUST00000021991 | ENSMUST00000021519  | Mterf3        |
| ENSMUST00000115630 | 2499.521703 -0.366036270.170281596 -2.14959387 0.0315873530.123208353907055    | ENSMUST00000115630 | NA                  | NA            |
| ENSMUST0000071399  | 61.277308230.7509434190.3493538452.1495209780.0315931240.12323268341414        | ENSMUST0000071399  | ENSMUSG00000066760  | Psg16         |
| ENSMUST00000167867 | 9089.8516010.4911087650.02284816462.1494451410.0315991300.123239923328643      | ENSMUST00000167867 | NA                  | NA            |
| ENSMUST00000165974 | 597.1124457 -0.548403090.0255146055 -2.149369270.0316051390.123248992781128    | ENSMUST00000165974 | ENSMUST00000165974  | NA            |
| ENSMUST00000112228 | 13699.178222.0.7121641260.3313340982.1493837470.0316039920.123248992781128     | ENSMUST00000112228 | ENSMUSG000000031342 | Gpm6b         |
| ENSMUST00000159125 | 1020.2301140.5937359550.02762525432.1492506340.0316145370.123278457889263      | ENSMUST00000159125 | ENSMUSG00000028455  | Stoml2        |
| ENSMUST00000136326 | 4694.250607 -0.47924668.0.222898754 -2.14918700 0.0316195780.123290932064098   | ENSMUST00000136326 | ENSMUSG00000166810  | Oxnad1        |
| ENSMUST00000166810 | 469.3734122 -0.338193560.0173579251 -2.14890820 0.0316416770.12336910867218    | ENSMUST00000166810 | ENSMUSG00000021906  | Xmnad1        |
| ENSMUST00000132920 | 901.8808577 -0.372035010.0173129456 -2.14888340 0.0316436430.123370389061061   | ENSMUST00000132920 | ENSMUSG00000015766  | Eps8          |
| ENSMUST0000006341  | 62.82919741 -0.673143290.0313269236 -2.14876921 0.0316526990.1233841275077463  | ENSMUST0000006341  | ENSMUSG00000006341  | Prrs16        |
| ENSMUST00000147219 | 14501.321620.4393953740.2044830362.1488108900.0316493930.1233841275077463      | ENSMUST00000147219 | ENSMUSG00000026822  | Lcn2          |
| ENSMUST00000109117 | 2102.1753120 -0.415105850.0193181677 -2.14878483 0.0316514600.1233841275077463 | ENSMUST00000109117 | ENSMUSG00000052033  | Pfn4d         |
| ENSMUST0000036407  | 1069.8544590.3737683870.01739486892.1487278120.0316559820.12338739544236       | ENSMUST0000036407  | ENSMUSG00000033478  | Fam160b1      |
| ENSMUST00000129428 | 10692.695020.2967918580.1381328162.1485977450.0316636030.123415579554279       | ENSMUST00000129428 | ENSMUST00000129428  | Nfk1b         |
| ENSMUST00000018470 | 27881.11548 -0.29144858.0.135644925 -2.148613970.0316650130.123415579554279    | ENSMUST00000018470 | ENSMUSG00000018326  | Ywhab         |
| ENSMUST0000043815  | 8896.538216 -0.418514190.0194796374 -2.14847014 0.0316764250.123447850369853   | ENSMUST0000043815  | ENSMUSG00000043815  | Nup205        |
| ENSMUST00000170324 | 1395.2444510.3674797230.0170466152.1484185620.0316805190.123449514240354       | ENSMUST00000170324 | ENSMUSG00000060671  | Atp8b2        |
| ENSMUST00000060447 | 2620.518206 -0.326223480.0151843570 -2.14841819 0.0316805480.123449514240354   | ENSMUST00000060447 | ENSMUSG000000060447 | Mettl5        |
| ENSMUST00000129577 | 4779.5145720.3724198940.01733577652.1482735030.0316920340.123487106543888      | ENSMUST00000129577 | ENSMUST00000129577  | Clk1          |
| ENSMUST00000115160 | 5241.503183 -0.427766390.0199129149 -2.14818570 0.0316990060.123507079287591   | ENSMUST00000115160 | ENSMUSG00000027982  | Them209       |
| ENSMUST00000122906 | 2028.446974 -0.495649430.0230753983 -2.14795612 0.0317172410.123570932877975   | ENSMUST00000122906 | NA                  | NA            |
| ENSMUST00000151869 | 1791.7416130.294601640.01371559162.1479324210.0317191240.123571075305817       | ENSMUST00000151869 | ENSMUSG00000050812  | A1314180      |
| ENSMUST00000166783 | 438.7538292 -0.819849600.0361696840 -2.14790776 0.0317210830.123571514698383   | ENSMUST00000166783 | ENSMUSG00000032735  | Abilm3        |
| ENSMUST00000020215 | 49.8306660 -0.97434798.0.453641391 -2.14783748 0.0317266680.123571689463469    | ENSMUST00000020215 | ENSMUSG00000041923  | Nol4          |
| ENSMUST00000149068 | 7424.814596 -0.727901890.0338893646 -2.14787706 0.0317235220.123571689463469   | ENSMUST00000149068 | ENSMUSG00000028063  | Lmna          |
| ENSMUST00000106665 | 2915.991071 -0.32058171.0153447556 -2.147845960.031725940.123571689463469      | ENSMUST00000106665 | ENSMUSG00000028582  | Cc2d1b        |
| ENSMUST00000176620 | 41.13444408.0.856624866.0.3988376312.1478035120.0317293670.123575010897924     | ENSMUST00000176620 | ENSMUSG00000029055  | Pch2          |
| ENSMUST00000138578 | 217.8305798 -0.562309320.0261814205 -2.14774186 0.0317342670.12357970839748    | ENSMUST00000138578 | ENSMUSG00000030243  | Recql         |
| ENSMUST00000112226 | 14131.030760.7137276590.3323150372.1477440950.0317340900.12357970839748        | ENSMUST00000112226 | ENSMUSG00000031342  | Gpm6b         |
| ENSMUST00000129652 | 217.67388210.5412350280.2520433642.14773885280.0317623630.123675545467431      | ENSMUST00000129652 | ENSMUSG00000026213  | Stk11ip       |
| ENSMUST00000149916 | 305.9940594 -0.509510870.0237270292 -2.14738587 0.0317625730.123675545467431   | ENSMUST00000149916 | ENSMUSG00000024118  | 160002H07Rik  |
| ENSMUST00000175805 | 6003.1998620.3330034180.1550892642.1471725890.0317795440.123727224154244       | ENSMUST00000175805 | ENSMUSG00000022361  | Zhh1          |
| ENSMUST00000143468 | 418.78116630.3717516700.0173139192.1471914430.0317780430.123727224154244       | ENSMUST00000143468 | ENSMUSG00000020385  | Chk4          |
| ENSMUST00000117398 | 21.11625810.9164663740.4268327482.1471322830.0317827510.12373251458962         |                    |                     |               |

|                     |                                                                                 |                     |                      |               |
|---------------------|---------------------------------------------------------------------------------|---------------------|----------------------|---------------|
| ENSMUST00000146608  | 2655.868045 0.318670715 0.148557069 2.145106375 0.031944342 0.124116096754994   | ENSMUST00000146608  | ENSMUSG000000028041  | Adam15        |
| ENSMUST00000146889  | 1738.035116 -0.355727740 0.165837639 -2.14503625 0.031949948 0.124130669373014  | ENSMUST00000146889  | ENSMUST00000004642   | Silp          |
| ENSMUST000000042141 | 28017.46766 -0.31513236 0.146920575 -2.14491647 0.031995250 0.124155005598589   | ENSMUST000000042141 | ENSMUSG000000042699  | Dhv9          |
| ENSMUST00000112235  | 19267.05139 0.712859652 0.332350923 2.144900471 0.031968005 0.124155005598589   | ENSMUST00000112235  | ENSMUST000000012235  | Gpm6b         |
| ENSMUST00000109972  | 16216.69258 -0.301530520 0.140581266 -2.14488412 0.031962112 0.124155005598589  | ENSMUST00000109972  | ENSMUSG000000055762  | Eef1d         |
| ENSMUST00000151488  | 9506.084605 0.297173371 0.138551077 2.144865108 0.031963630 0.124155005598589   | ENSMUST00000151488  | ENSMUST0000000151488 | Yipf3         |
| ENSMUST00000173158  | 1745.697579 -0.440195030 0.205238388 -2.14479870 0.031968944 0.124168427610504  | ENSMUST00000173158  | ENSMUSG000000021519  | Mterf3        |
| ENSMUST00000109560  | 492.4219402 0.493520202 0.230109411 2.144719760 0.031975259 0.124178541416349   | ENSMUST00000109560  | NA                   | NA            |
| ENSMUST00000163888  | 492.4219402 0.493520202 0.230109411 2.144719760 0.031975259 0.124178541416349   | ENSMUST00000163888  | ENSMUSG000000055853  | Mef2c         |
| ENSMUST00000149550  | 1180.247558 -0.403927530 0.188361377 -2.14442865 0.0319985560 0.124261802933268 | ENSMUST00000149550  | ENSMUST0000000149550 | Ash2l         |
| ENSMUST00000137887  | 1469.878367 -0.30364970 0.141609350 -2.14427722 0.032010680 0.124290798339279   | ENSMUST00000137887  | ENSMUSG000000025903  | Lypla1        |
| ENSMUST00000109946  | 3609.053200 -0.57765866 0.269393316 -2.14429470 0.032002860 0.124290798339279   | ENSMUST00000109946  | ENSMUST0000000109946 | Scrib         |
| ENSMUST00000097288  | 41.94823101 0.918151315 0.428189132 2.144265806 0.032011594 0.124290798339279   | ENSMUST00000097288  | ENSMUSG00000003279   | Dlgap1        |
| ENSMUST00000040240  | 2549.604466 0.552760185 0.257790418 2.14423162 0.032015009 0.124296846040945    | ENSMUST00000040240  | NA                   | NA            |
| ENSMUST00000173891  | 398.9386258 -0.57650048 0.268873130 -2.14413574 0.032022011 0.124310174701499   | ENSMUST00000173891  | ENSMUSG000000021519  | Mterf3        |
| ENSMUST00000132723  | 87.12018525 -0.805577320 0.375712226 -2.14413391 0.032022158 0.124310174701499  | ENSMUST00000132723  | ENSMUST000000020486  | sept-04       |
| ENSMUST00000162600  | 2279.784440 0.364673388 0.170109702 2.143754201 0.032052586 0.124421080224371   | ENSMUST00000162600  | ENSMUSG000000056870  |               |
| ENSMUST00000025561  | 62340.13749 -0.55189953 0.257459085 -2.14363975 0.032061762 0.12444261408624    | ENSMUST00000025561  | ENSMUST000000025561  | Gulp1         |
| ENSMUST00000156255  | 357.2160858 0.703768663 0.328302730 2.143657661 0.032060326 0.12444261408624    | ENSMUST00000156255  | ENSMUSG000000024659  | Anxa1         |
| ENSMUST00000050096  | 6089.502455 0.302250859 0.141003562 2.143568951 0.032067440 0.124449863906747   | ENSMUST00000050096  | ENSMUST0000000156255 | Ptpr          |
| ENSMUST00000163814  | 1894.938244 -0.40668086 0.189721137 -2.14357169 0.032067220 0.124449863906747   | ENSMUST00000163814  | ENSMUSG000000050096  | Add3          |
| ENSMUST00000160000  | 160.3083071 -0.82545049 0.385105853 -2.14343792 0.032077950 0.124483430080836   | ENSMUST00000160000  | NA                   | NA            |
| ENSMUST00000143825  | 1526.22467 0.524514638 0.244730051 2.143237558 0.032094027 0.124538599835484    | ENSMUST00000143825  | ENSMUSG000000060000  | Selp          |
| ENSMUST00000156759  | 1180.869197 0.45071855 0.210303249 -2.14318386 0.032098320 0.124542819980392    | ENSMUST00000156759  | ENSMUST0000000156759 | Cdc42ep5      |
| ENSMUST00000126622  | 57.40635599 -0.87367060 0.407651981 -2.14317763 0.0320988370 0.124542819980392  | ENSMUST00000126622  | ENSMUSG000000048603  | Gm9b28        |
| ENSMUST000000663747 | 3607.518074 -0.57733773 0.26938689 -2.14314020 0.032101841 0.124547255061718    | ENSMUST000000663747 | ENSMUSG000000025568  | sept-04       |
| ENSMUST00000122067  | 86.36842349 -0.80905686 0.377526805 -2.14304481 0.032109500 0.124569745445466   | ENSMUST00000122067  | ENSMUST000000022067  |               |
| ENSMUST00000131282  | 576.1392362 -0.57018164 0.266082607 -2.14287454 0.032123170 0.12461556669523    | ENSMUST00000131282  | ENSMUSG000000045751  | Mms22l        |
| ENSMUST00000088531  | 10.87670377 0.972707169 0.453997463 2.14258776 0.032150151 0.124712993954556    | ENSMUST00000088531  | ENSMUST000000085351  | Hrc           |
| ENSMUST00000099584  | 62290.68146 -0.55180103 0.257553290 -2.14273259 0.032155418 0.1247261956473     | ENSMUST00000099584  | ENSMUST00000099584   | NA            |
| ENSMUST00000046290  | 252.589065 0.734431747 0.342807880 2.142400422 0.032161730 0.12473606635958     | ENSMUST00000046290  | ENSMUSG0000000046290 | Lpcat2        |
| ENSMUST00000146127  | 792.8118321 -0.44143906 0.206049312 -2.14239522 0.032161691 0.12473606635958    | ENSMUST00000146127  | ENSMUST000000146127  | Utp6          |
| ENSMUST00000170860  | 247.3125865 0.738944110 0.344929932 2.142302076 0.032169181 0.124757885439695   | ENSMUST00000170860  | NA                   | NA            |
| ENSMUST00000070143  | 6045.921745 0.329424933 0.15375265 2.142249160 0.0321734370 0.12476158497046    | ENSMUST00000070143  | ENSMUSG000000022361  | Zhx1          |
| ENSMUST00000143769  | 1388.887764 0.39014143 0.158253453 2.142227180 0.032175564 0.124768175399954    | ENSMUST00000143769  | ENSMUST0000000143769 | Uhrf2         |
| ENSMUST00000147181  | 1047.445677 0.360977582 0.168514639 2.142114082 0.032184302 0.124794830483847   | ENSMUST00000147181  | ENSMUSG000000054823  | Whsc1l1       |
| ENSMUST00000123619  | 201.2605709 -0.76039194 0.355001874 -2.14193783 0.032198484 0.124842586271213   | ENSMUST00000123619  | ENSMUST0000000123619 | Col11a1       |
| ENSMUST00000105097  | 3727.347479 0.485458548 0.226650620 2.141880513 0.032203098 0.124846007226727   | ENSMUST00000105097  | ENSMUSG000000032846  | Zswim6        |
| ENSMUST00000052377  | 3727.347479 0.485458548 0.226650620 2.141880513 0.032203098 0.124846007226727   | ENSMUST00000052377  | NA                   | NA            |
| ENSMUST00000149654  | 1062.790593 -0.46562399 0.217400677 -2.14177802 0.032211348 0.124870756919227   | ENSMUST00000149654  | ENSMUSG000000019738  | Polr2i        |
| ENSMUST00000154547  | 1100.009600 -0.47742480 0.222916744 -2.14171798 0.032216182 0.124875894080836   | ENSMUST00000154547  | ENSMUST0000000154547 | Tmem209       |
| ENSMUST00000172136  | 899.8472049 -0.38968419 0.181949583 -2.14171521 0.032216405 0.124875894080836   | ENSMUST00000172136  | ENSMUSG000000060260  | Pwppw2b       |
| ENSMUST00000109317  | 1310.1026330 0.500966334 0.23395341 2.141473499 0.032235870 0.124904236755758   | ENSMUST00000109317  | ENSMUST0000000109317 | Ptpr          |
| ENSMUST00000109316  | 1358.457016 0.50798464 0.237220313 2.141462748 0.032236739 0.124904236755758    | ENSMUST00000109316  | ENSMUSG000000017754  | Ptpr          |
| ENSMUST00000154253  | 1101.369159 0.500286715 0.233629145 2.141371164 0.032244180 0.124954361545285   | ENSMUST00000154253  | ENSMUST0000000154253 | Wdr45         |
| ENSMUST00000110087  | 1518.584336 -0.59764176 0.279900217 -2.14139273 0.032242380 0.124954361545285   | ENSMUST00000110087  | ENSMUSG000000037946  | Fgd3          |
| ENSMUST00000135363  | 26.6523879 0.850425142 0.397149720 2.141321268 0.032248310 0.12495470422712     | ENSMUST00000135363  | ENSMUST0000000135363 | 8030453022Rik |
| ENSMUST00000058790  | 1344.533473 -0.41339371 0.193054596 -2.14133060 0.032247386 0.12495470422712    | ENSMUST00000058790  | ENSMUSG000000048058  |               |
| ENSMUST00000109078  | 341.3599881 -0.52733731 0.246274021 -2.14126243 0.032252880 0.124966606188418   | ENSMUST00000109078  | ENSMUST0000000109078 | Cdk13         |
| ENSMUST00000172619  | 3306.570864 0.476572567 0.222576339 2.141164555 0.032260700 0.12498938969879    | ENSMUST00000172619  | ENSMUSG000000024308  | Tabpp         |
| ENSMUST00000127896  | 12091.45604 -0.36603104 0.170952653 -2.14112524 0.032263939 0.12498979544882    | ENSMUST00000127896  | ENSMUST0000000127896 | Rps27l        |
| ENSMUST00000150789  | 336.6728102 -0.42173281 0.196977308 -2.14102235 0.032272235 0.125019883614348   | ENSMUST00000150789  | ENSMUSG000000027652  | Ralgapb       |
| ENSMUST00000150137  | 12986.26446 -0.32814295 0.153267846 -2.14097711 0.032275883 0.125026778760241   | ENSMUST00000150137  | ENSMUST0000000150137 | Calm2         |
| ENSMUST000000991951 | 3942.351377 0.354639319 0.165656250 2.140814597 0.032288992 0.125065479166196   | ENSMUST000000991951 | NA                   | NA            |
| ENSMUST000000161309 | 35.85408789 -0.96866993 0.452491501 -2.14080691 0.032289610 0.125065479166196   | ENSMUST000000161309 | ENSMUST000000034308  | Bco1          |
| ENSMUST00000101388  | 469.5383059 0.455771350 0.212904963 2.140726749 0.032296080 0.125083289910486   | ENSMUST00000101388  | ENSMUST00000001388   | Zxd           |
| ENSMUST00000155324  | 1170.705847 -0.37534876 0.175376409 -2.1404659 0.032334843 0.125218925118264    | ENSMUST00000155324  | ENSMUSG000000016309  | Pole4         |
| ENSMUST000000080934 | 52.41804121 -0.89017258 0.415916221 -2.14026897 0.032333035 0.125218925118264   | ENSMUST000000080934 | ENSMUST0000000155324 | Aloxex3       |
| ENSMUST00000126873  | 63.73535311 0.918710281 0.429262920 2.140204144 0.032338270 0.1252495875461     | ENSMUST00000126873  | ENSMUST000000080934  | Epha7         |
| ENSMUST00000102590  | 48.90366047 0.798795169 0.373247699 2.140120810 0.032345004 0.12523653459331    | ENSMUST00000102590  | ENSMUST0000000126873 | Tnni3         |
| ENSMUST00000162808  | 10018.20428 -0.26516453 0.123900953 -2.14013317 0.032344006 0.12523653459331    | ENSMUST00000162808  | ENSMUST0000000102590 | Kpna6         |
| ENSMUST00000149461  | 2442.034694 0.335983230 0.157005045 2.139951805 0.032358661 0.125282164542062   | ENSMUST00000149461  | ENSMUST000000162808  | Kctd17        |
| ENSMUST00000040917  | 2447.645241 -0.32413776 0.151506687 -2.13942877 0.032400930 0.125438664791251   | ENSMUST00000040917  | ENSMUST0000000149461 | Naa20         |
| ENSMUST00000141471  | 12083.48446 -0.36572455 0.170956787 -2.13928066 0.032412944 0.12547780829866    | ENSMUST00000141471  | ENSMUST000000040917  | Rps27l        |
| ENSMUST00000138126  | 14.31841799 0.960269840 0.448891990 2.139200210 0.032419457 0.125495761873957   | ENSMUST00000138126  | ENSMUST0000000141471 | Sema4a        |
| ENSMUST00000049658  | 1076.366209 0.390768554 0.182673609 2.139162609 0.032422501 0.12550028538662    | ENSMUST00000049658  | ENSMUST0000000138126 | Sfi1          |
| ENSMUST00000153911  | 3497.672725 -0.41650873 0.194711299 -2.13910923 0.032426822 0.125509753996352   | ENSMUST00000153911  | ENSMUST000000049658  | Pitpnm1       |
| ENSMUST00000132296  | 3247.436837 0.574885694 0.268759191 2.139036398 0.032432720 0.12552532085254    | ENSMUST00000132296  | ENSMUST0000000153911 | Amotl2        |
| ENSMUST00000043602  | 3236.519757 -0.38613049 0.180521574 -2.13897146 0.032437979 0.125538412868257   | ENSMUST00000043602  | ENSMUST0000000132296 | Gm11583       |
| ENSMUST00000005802  | 8406.457918 -0.29872777 0.139666368 -2.13886693 0.032446446 0.125563921312687   | ENSMUST00000005802  | ENSMUST000000043602  | Gna11         |
| ENSMUST00000140846  | 1380.757720 -0.422912170 0.197737240 -2.13875837 0.032455242 0.125590695143028  | ENSMUST00000140846  | ENSMUST00000005802   | Tpcn2         |
| ENSMUST00000167391  | 4278.1849026 0.340114330 0.159026076 2.138733135 0.032457287 0.125591347403851  | ENSMUST00000167391  | ENSMUST0000000140846 | Sfi1          |
| ENSMUST00000049378  | 1624.341197 0.52114520 0.243678813 2.138693234 0.032460520 0.12559596503035     | ENSMUST00000049378  | ENSMUST0000000167391 | Adams9        |
| ENSMUST00000156129  | 442.8464128 -0.81761146 0.382312796 -2.13859298 0.032468646 0.125620771763423   | ENSMUST00000156129  | ENSMUST000000049378  | Abilim3       |
| ENSMUST00000148824  | 685.6361098 0.39319502 0.183869559 -2.13844429 0.032480701 0.125660146493076    | ENSMUST00000148824  | ENSMUST0000000156129 | Terpr1        |
| ENSMUST00000030140  | 7622.816931 0.334999197 0.156666341 2.138297781 0.032492631 0.125693195230746   | ENSMUST00000030140  | ENSMUST0000000148824 | Ifi2          |
| ENSMUST00000223215  | 6418.689608 0.32293158 0.151023101 -2.13829263 0.032493000 0.125693195230746    | ENSMUST00000223215  | ENSMUST00000030140   | Ikbpap        |
| ENSMUST00000147394  | 2923.957604 -0.37795141 0.176758170 -2.13824013 0.032497258 0.1257024010714     | ENSMUST00000147394  | NA                   | NA            |
| ENSMUST00000126702  | 12085.48534 -0.36552974 0.170955662 -2.13815522 0.032504147 0.125721780396622   | ENSMUST00000126702  | ENSMUST0000000147394 | Rps27l        |
| ENSMUST00000110561  | 75.79594221 0.949836042 0.444242376 2.138103190 0.032508369 0.125730842676139   | ENSMUST00000110561  | ENSMUST0000000126702 | Notch4        |
| ENSMUST00000109956  | 4417.211215 -0.49288539 0.230528145 -2.13807035 0.032511033 0.125733880923814   | ENSMUST00000109956  | ENSMUST0000000110561 | NA            |
| ENSMUST00000105969  | 6643.254261 -0.27287960 0.127630999 -2.13803547 0.032513864 0.12573562151999    | ENSMUST00000105969  | ENSMUST0000000109956 | Sla2          |
| ENSMUST00000109983  |                                                                                 |                     |                      |               |

|                     |                                                                              |                     |                      |               |
|---------------------|------------------------------------------------------------------------------|---------------------|----------------------|---------------|
| ENSMUST00000067103  | 1557.5806670.3301316320.0.1546334592.1349301350.0327667170.0.126437734441537 | ENSMUST000000067103 | ENSMUSG000000023980  | Taf8          |
| ENSMUST000000028166 | 2111.563926-0.490008250.0.229518803-2.13493730.0.0327661310.126437734441537  | ENSMUST000000028166 | ENSMUSG000000028166  | Nr4a2         |
| ENSMUST000000154098 | 6398.4616450.4273504270.0.2001782822.1348491070.0327773370.126455988020172   | ENSMUST000000154098 | ENSMUSG000000055850  | Rnf181        |
| ENSMUST000000120087 | 19421.129050.6134152960.2873395282.1348099930.0327765330.1264610285067764    | ENSMUST000000120087 | ENSMUSG000000120087  | Samd9l        |
| ENSMUST000000059287 | 2917.4742080.5269726470.2468598722.1347035530.0327852320.126487298399572     | ENSMUST000000059287 | ENSMUSG000000028664  | Ephb2         |
| ENSMUST000000172979 | 2568.3340930.5509281910.25680897352.1346381360.0327905790.126500635139262    | ENSMUST000000172979 | ENSMUSG00000001687   | H2-Q5         |
| ENSMUST000000100077 | 856.1182878-0.46177643.0.216341960-2.134474640.0328039460.1265449070260265   | ENSMUST000000100077 | ENSMUSG00000075327   | Zbtb2         |
| ENSMUST000000065487 | 426.5924024-0.50036975.0.234432877-2.134383860.0328113171.0.1265589570008    | ENSMUST000000065487 | ENSMUSG000000053198  | Prx           |
| ENSMUST000000138740 | 1007.8754420.3230437470.0.1513507002.1344053680.0328096120.1265589570008     | ENSMUST000000138740 | ENSMUSG00000037486   | Asxl2         |
| ENSMUST000000138019 | 1246.6015030.3732705370.0.1748926142.1342841690.0328195260.12658311597264    | ENSMUST000000138019 | ENSMUSG000000040365  | Trim41        |
| ENSMUST000000131831 | 6035.5571590.3606579410.1690181392.1338416320.0328557460.12671551239721      | ENSMUST000000131831 | ENSMUSG000000029598  | Pibid2        |
| ENSMUST000000793224 | 3790.190318-0.354094100.0.165956628-2.133654500.0328710730.126767316403486   | ENSMUST000000793224 | ENSMUSG00000079324   | Ubl3          |
| ENSMUST00000159243  | 636.0329222-0.719617640.0.337300886-2.133459100.0328870830.126814442836705   | ENSMUST00000159243  | ENSMUSG00000046324   | Ermp1         |
| ENSMUST000000053252 | 2106.6371370.4113431700.0.1928039352.1334791220.0328854420.126814442836705   | ENSMUST000000053252 | ENSMUSG000000048644  | Cttn1         |
| ENSMUST000000141810 | 214.54045810.4855929310.0.2276482242.1330846370.0329177830.126912036395005   | ENSMUST000000141810 | ENSMUSG000000085118  | Gm15774       |
| ENSMUST000000086461 | 3736.050794-0.356319930.0.167044727-2.133081000.0329180820.126912036395005   | ENSMUST000000086461 | ENSMUSG000000029363  | Rfc5          |
| ENSMUST000000094626 | 415.71932030.6084248370.2852305812.1330981880.0329166720.126912036395005     | ENSMUST000000094626 | ENSMUSG000000047216  | Cdh19         |
| ENSMUST000000164212 | 126.73216980.5752817170.0.16097004882.1330392080.0329215090.12691794015264   | ENSMUST000000164212 | ENSMUSG000000164212  | Rhobtb1       |
| ENSMUST000000100022 | 3437.788666-0.418737010.0.196318783-2.132944220.0329239010.126940665796487   | ENSMUST000000100022 | ENSMUSG000000024851  | Pitpnm1       |
| ENSMUST00000067085  | 39.541478600.825690325.0.3871248572.1328786010.0329346860.12694679606037     | ENSMUST00000067085  | ENSMUSG000000067085  | Nepn          |
| ENSMUST000000165983 | 39.541478600.825690325.0.3871248572.1328786010.0329346860.12694679606037     | ENSMUST000000165983 | NA                   |               |
| ENSMUST000000086084 | 10.26896241-0.948640440.0.444801632-2.132726980.0329471280.126972045567523   | ENSMUST000000086084 | ENSMUSG000000066755  | Tnfrsf18      |
| ENSMUST00000007261  | 69.958029460.7203097930.0.3377463982.1326942240.0329498180.126972045567523   | ENSMUST00000007261  | ENSMUSG000000053040  | Aph1c         |
| ENSMUST00000135085  | 16.578191030.9658888530.4528847362.1327476370.0329454330.126972045567523     | ENSMUST00000135085  | ENSMUSG000000135085  | NA            |
| ENSMUST000000127894 | 2365.6972560.0.465583160.0.218308640-2.132681380.0329507230.126972045567523  | ENSMUST000000127894 | ENSMUSG000000017894  | Aven          |
| ENSMUST000000149691 | 11545.051140.3511743010.0.1646577122.1327534350.0329449570.126972045567523   | ENSMUST000000149691 | ENSMUSG000000027447  | Cst3          |
| ENSMUST000000123369 | 27.041220880.891538770.0.418089785-2.132409850.0329731670.127051214517876    | ENSMUST000000123369 | ENSMUSG000000123369  | Asp1          |
| ENSMUST000000220338 | 4407.778092-0.272566780.0.127827915-2.132294690.0329826270.127065716691687   | ENSMUST000000220338 | ENSMUSG000000220338  | Naa35         |
| ENSMUST000000120531 | 179.92968150.5880005940.2757593012.1322965080.0329824780.127065716691687     | ENSMUST000000120531 | ENSMUSG000000046314  | Stxbp6        |
| ENSMUST000000150757 | 1326.030116-0.352423570.165278945-2.132295650.0329825480.127065716691687     | ENSMUST000000150757 | ENSMUSG00000027569   | Mrgbp         |
| ENSMUST00000065938  | 5200.635005-0.341256200.160045243-2.132248330.0329864370.12707305763704      | ENSMUST00000065938  | ENSMUSG000000065938  | Impa1         |
| ENSMUST000000112000 | 874.5323884-0.331476130.0.147025445-2.132121650.0329968460.127105860112105   | ENSMUST000000112000 | ENSMUSG000000021905  | Dph3          |
| ENSMUST000000153362 | 1168.7477320.4311837810.2022385502.1320553430.0330022970.127119537172611     | ENSMUST000000153362 | ENSMUSG000000153362  | Dock7         |
| ENSMUST000000163091 | 1085.9229820.4342253030.2036692792.1320117830.0330058770.127126012268823     | ENSMUST000000163091 | ENSMUSG000000021461  | Fancx         |
| ENSMUST000000137022 | 723.02694980.3689614970.0.1730643852.1319319760.0330124390.127135502720152   | ENSMUST000000137022 | ENSMUSG000000073557  | Ppp1r12b      |
| ENSMUST000000154397 | 140.7072583-0.584542060.274182719-2.131943490.0330114920.127135502720152     | ENSMUST000000154397 | ENSMUSG00000034587   | 8430429K09rik |
| ENSMUST000000148833 | 1192.907811-0.428530840.0.201007711-2.131912480.0330140410.127135502720152   | ENSMUST000000148833 | ENSMUSG000000148833  | Gcpd1         |
| ENSMUST00000020985  | 34.87631624-0.951824010.0.446488982-2.131797320.0330235110.127164654168804   | ENSMUST00000020985  | ENSMUSG00000020985   | Grhl1         |
| ENSMUST000000034774 | 8221.3425310.9064446810.4252095782.1317597890.0330265980.1271692378203       | ENSMUST000000034774 | ENSMUSG000000034774  | Itga11        |
| ENSMUST00000027493  | 863.1339460-0.556314290.260976109-2.131667510.0330341890.127190387240247     | ENSMUST00000027493  | ENSMUSG000000027493  | Pask          |
| ENSMUST00000040880  | 48.837716880.7302413650.3425751832.1316236590.0330377970.127190387240247     | ENSMUST00000040880  | ENSMUSG000000040880  | Map6d1        |
| ENSMUST000000147591 | 2026.6016420.3977740360.1866044232.1316431240.0330361950.127190387240247     | ENSMUST000000147591 | ENSMUSG000000274065  | Tbc1d20       |
| ENSMUST000000144285 | 3913.750412-0.334569950.0.156957314-2.131598350.0330398790.127190387240247   | ENSMUST000000144285 | ENSMUSG0000000144285 | Ndufb10       |
| ENSMUST000000111222 | 1339.895869-0.412784900.0.193668234-2.131402210.0330560200.127245904264943   | ENSMUST000000111222 | ENSMUSG000000048058  | Ldlrad3       |
| ENSMUST000000137953 | 4375.9667530.3854550400.180871618-2.131097430.0330811160.127351824902693     | ENSMUST000000137953 | ENSMUSG0000000137953 | Trmt1         |
| ENSMUST00000032749  | 1360.617208-0.356862210.0.167473438-2.130858610.0331007910.127376200799715   | ENSMUST00000032749  | ENSMUSG000000032749  | Vps33b        |
| ENSMUST000000164810 | 1360.617208-0.356862210.0.167473438-2.130858610.0331007910.127376200799715   | ENSMUST000000164810 | NA                   |               |
| ENSMUST000000150585 | 1360.617208-0.356862210.0.167473438-2.130858610.0331007910.127376200799715   | ENSMUST000000150585 | ENSMUSG000000030534  | Vps33b        |
| ENSMUST000000151794 | 798.40704420.3972671290.0.1864357652.1308525670.0331012900.127376200799715   | ENSMUST000000151794 | ENSMUSG000000015194  | Btbd2         |
| ENSMUST000000135679 | 1314.399665-0.338036930.0.158636689-2.130887460.0330984140.127376200799715   | ENSMUST000000135679 | NA                   |               |
| ENSMUST000000129244 | 138.2084418-0.714333120.0.335238497-2.130820680.0331039170.127378987984713   | ENSMUST000000129244 | ENSMUSG0000000129244 | Rpia          |
| ENSMUST000000088561 | 1074.7854870.3309128720.0.1553098012.1306631530.0331169020.127421624396062   | ENSMUST000000088561 | ENSMUSG000000088561  | Pex26         |
| ENSMUST000000131119 | 1883.580286-0.296019210.0.138937810-2.130587910.033121060.127437064762786    | ENSMUST000000131119 | ENSMUSG000000013119  | Lyp1a1        |
| ENSMUST000000156416 | 118.3426939-0.836788210.0.392757786-2.130545190.0331266280.127437064762786   | ENSMUST000000156416 | NA                   |               |
| ENSMUST000000081318 | 1800.3165340.3442229920.0.1615656392.1305457840.0331265800.127437064762786   | ENSMUST000000081318 | ENSMUSG000000081318  | Sfi1          |
| ENSMUST000000162372 | 9184.7183490.3903275880.1832313172.1302449500.0331513950.127517681190814     | ENSMUST000000162372 | ENSMUSG000000029221  | Sic30a9       |
| ENSMUST000000112629 | 2109.793247-0.490487330.230247491-2.130261340.03315500420.127517681190814    | ENSMUST000000112629 | ENSMUSG000000012629  | Nr4a2         |
| ENSMUST000000142101 | 8518.2069870.4010094960.1882495782.1302012940.0331549980.12752420805404      | ENSMUST000000142101 | ENSMUSG000000024807  | Sym1          |
| ENSMUST00000073881  | 3005.661012-0.330132400.0.154981360-2.130142620.0331598400.12753550217881    | ENSMUST00000073881  | ENSMUSG0000000073881 | Med8          |
| ENSMUST000000042730 | 7669.171141-0.372061850.0.174674245-2.130032690.0331689140.12756306960643    | ENSMUST000000042730 | ENSMUSG000000042700  | Gstp2         |
| ENSMUST00000063435  | 30.894261350.9552018680.4484872582.1298305610.0331856040.127597924979976     | ENSMUST00000063435  | NA                   |               |
| ENSMUST000000300051 | 33630.57698-0.364369920.0.171074542-2.129889800.0331880710.127597924979976   | ENSMUST000000300051 | ENSMUSG000000028367  | Txn1          |
| ENSMUST000000175800 | 556.28610680.5542728720.2602410222.1298443540.0331844650.127597924979976     | ENSMUST000000175800 | ENSMUSG0000000175800 | Bnc2          |
| ENSMUST000000064139 | 42126.507790.2540178830.11922661962.1298397220.0331848470.127597924979976    | ENSMUST000000064139 | ENSMUSG000000028517  | P1pp3         |
| ENSMUST000000140626 | 2755.3350480.5572199250.2616338852.1297697140.0331906300.127609916103511     | ENSMUST000000140626 | ENSMUSG0000000140626 | Lsp1          |
| ENSMUST000000142849 | 4173.8404000.2863114000.0.1344353552.1297329040.0331936700.127614274665097   | ENSMUST000000142849 | ENSMUSG000000030805  | Stx4a         |
| ENSMUST000000135204 | 238.1115980-0.604526130.0.283876496-2.129539230.0332096720.127646845877326   | ENSMUST000000135204 | ENSMUSG0000000135204 | Zak           |
| ENSMUST000000095128 | 3591.554703-0.328527810.0.154274008-2.129508540.0332122080.127670873908417   | ENSMUST000000095128 | ENSMUSG000000095128  | Ndufb6        |
| ENSMUST000000035148 | 10014.78327-0.419659780.0.197075077-2.129441160.0332177770.12768494763049    | ENSMUST000000035148 | ENSMUSG000000035148  | Sico2a1       |
| ENSMUST000000174162 | 8.6840416290.9398781300.4413804982.1294056570.0332207120.12768889470906      | ENSMUST000000174162 | ENSMUSG000000057836  | Xlr3a         |
| ENSMUST000000134046 | 824.17593330.322486120.0.151450643-2.129314980.0332282080.127689015636644    | ENSMUST000000134046 | ENSMUSG0000000134046 | 3110002H16rik |
| ENSMUST000000128427 | 600.11763450.4803311080.0.2255803252.1293129530.0332283760.127689015636644   | ENSMUST000000128427 | ENSMUSG000000033961  | Zfp446        |
| ENSMUST000000159285 | 2483.2620720.3421246500.1606704362.1293565720.0332247700.127689015636644     | ENSMUST000000159285 | ENSMUSG0000000159285 | Vcan          |
| ENSMUST000000123919 | 288.0390303-0.482007300.0.226360342-2.129380540.0333227780.127689015636644   | ENSMUST000000123919 | ENSMUSG000000023919  | Frm4d4        |
| ENSMUST000000165322 | 6133.050456-0.290640630.136497522-2.129274090.03332315890.127694290021189    | ENSMUST000000165322 | ENSMUSG0000000165322 | O3ftrd751e    |
| ENSMUST00000026867  | 198.38681210.4700040020.0.220745443-2.129167480.033324040500.127720571399618 | ENSMUST00000026867  | ENSMUSG000000026867  |               |
| ENSMUST000000167557 | 372.54479360.518229540.2434002390.129125020.0332439170.12776771704999        | ENSMUST000000167557 | NA                   |               |
| ENSMUST000000138886 | 501.03575020.4885243290.227928514-2.128927540.0332602550.127767494407408     | ENSMUST000000138886 | ENSMUST000000138886  | Polr2i        |
| ENSMUST000000066921 | 1291.259277-0.407902060.0.191599192-2.128934140.0332597080.127767494407408   | ENSMUST000000066921 | ENSMUSG000000054099  | Sic25a40      |
| ENSMUST000000175926 | 4382.5632700-0.425464710.0.1998490030.1289330890.0332599780.127767494407408  | ENSMUST000000175926 | ENSMUSG0000000175926 | Ppp2r1b       |
| ENSMUST000000139826 | 1878.0565250.9663913660.4540049982.1285919080.0332880380.127866882782369     | ENSMUST000000139826 | ENSMUSG000000028965  | Tnfrsf9       |
| ENSMUST000000122846 | 372.35177680.5398158200.2536085782.1285392720.0332923970.12787628574907408   | ENSMUST000000122846 | ENSMUSG0000000122846 | Croc          |
| ENSMUST000000155793 | 1670.5628980.3746003830.1759932052.1284934420.03329619                       |                     |                      |               |

|                    |                                                                                |                    |                     |               |
|--------------------|--------------------------------------------------------------------------------|--------------------|---------------------|---------------|
| ENSMUST00000146695 | 5614.216780 -0.27081068 0.127387142 -2.12588713 0.0335126580 0.128449515218336 | ENSMUST00000146695 | ENSMUSG000000027455 | Nsf11c        |
| ENSMUST00000123043 | 988.1948356 0.360931582 0.169784042 2.125827483 0.0335176260 128461199747071   | ENSMUST00000123043 | ENSMUSG00000022124  | Fbx3          |
| ENSMUST00000079294 | 16172.92514 0.331045193 0.1557350862 1.25694345 0.0335287180 12848899066286    | ENSMUST00000079294 | ENSMUSG00000064215  | Ifi27         |
| ENSMUST00000136711 | 564.7819508 0.453315963 0.213254802 0.1701079 0.0335281570 12848899066286      | ENSMUST00000136711 | ENSMUSG00000006043  | Phactr4       |
| ENSMUST00000131824 | 1160.951301 0.320860301 0.1424521872 1.25669717 0.033507700 128489496308079    | ENSMUST00000131824 | ENSMUSG00000037110  | Ralgap2       |
| ENSMUST00000109418 | 2175.968654 -0.38340833 0.18037711 -2.12558599 0.0335377460 12850887147213     | ENSMUST00000109418 | ENSMUSG00000044816  | Fitm2         |
| ENSMUST00000176562 | 177.1323068 0.615953733 0.2897875862 1.255352640 0.0335419740 128517713709085  | ENSMUST00000176562 | ENSMUSG00000035934  | Pknox2        |
| ENSMUST00000172489 | 5023.851200 0.509346357 0.2396385032 1.254779610 0.033546751 0.128528655142019 | ENSMUST00000172489 | ENSMUSG00000024308  | Tapbp         |
| ENSMUST00000093982 | 1580.027856 0.320366843 0.1507359492 1.25351285 0.033537311 0.128561756092654  | ENSMUST00000093982 | NA                  | NA            |
| ENSMUST00000154837 | 7259.446386 0.504907812 0.2375683952 1.253515582 0.0335602880 1285685800952296 | ENSMUST00000154837 | ENSMUSG00000037266  | Rsrp1         |
| ENSMUST00000148029 | 33.13812880 8.67732219 0.4082937802 1.25264359 0.0335645600 128573818931608    | ENSMUST00000148029 | ENSMUSG00000034949  | Zfr2          |
| ENSMUST00000164936 | 235.0258150 0.474795486 0.2234119592 1.25201744 0.0335697820 128573818931608   | ENSMUST00000164936 | ENSMUSG000000164936 | Zfp493        |
| ENSMUST00000108697 | 2204.596766 -0.53940981 0.253816225 -2.12519833 0.033570067 0.128573818931608  | ENSMUST00000108697 | ENSMUSG00000020549  | Elac2         |
| ENSMUST00000146884 | 460.5672293 0.478830363 0.2253089852 1.25216456 0.0335685550 128573818931608   | ENSMUST00000146884 | ENSMUSG00000006920  | Ezh1          |
| ENSMUST00000098456 | 8281.893071 0.447412086 0.2105417852 1.250512640 0.0335823350 128606084993655  | ENSMUST00000098456 | NA                  | NA            |
| ENSMUST00000072492 | 2452.898902 -0.372320425 0.175196175 -2.12506038 0.0335815740 128606084993655  | ENSMUST00000072492 | ENSMUST00000072492  | NA            |
| ENSMUST00000141048 | 413.3688885 0.578602705 0.272238282 1.24998419 0.033586744 0.128608250522352   | ENSMUST00000141048 | ENSMUSG000000020263 | Appl2         |
| ENSMUST00000116440 | 15994.16050 -0.29491745 0.138784669 -2.12500025 0.033586591 0.128608250522352  | ENSMUST00000116440 | ENSMUSG000000055762 | Eef1d         |
| ENSMUST00000075543 | 1199.051366 0.3811770980 1.793942172 1.24801479 0.033603181 0.12863826020514   | ENSMUST00000075543 | NA                  | NA            |
| ENSMUST00000122918 | 1201.929178 0.383305880 0.1804084862 1.24655480 0.0336153700 128703134418842   | ENSMUST00000122918 | ENSMUSG000000008575 | Nfb           |
| ENSMUST00000008960 | 16010.31504 -0.29536292 0.139018959 -2.12462335 0.0336180530 128706041392475   | ENSMUST00000008960 | ENSMUSG00000005762  | Eef1d         |
| ENSMUST00000166615 | 3070.860717 -0.34850969 0.164041275 -2.12452441 0.0336263170 128730313794405   | ENSMUST00000166615 | ENSMUSG000000031390 | Wwp2          |
| ENSMUST00000151455 | 504.6695834 0.499268070 0.2350477832 1.24113072 0.033606689 0.128854529426797  | ENSMUST00000151455 | ENSMUSG00000001455  | Crocc         |
| ENSMUST00000114053 | 1868.220280 0.477026382 0.2245904592 1.239832840 0.0336715410 1.28887670392959 | ENSMUST00000114053 | ENSMUSG00000005799  | Tcf17         |
| ENSMUST00000155575 | 6099.234217 0.410387594 0.1932178222 1.23963459 0.0336731990 1.28887670392959  | ENSMUST00000155575 | ENSMUSG00000019132  | BC005537      |
| ENSMUST00000171226 | 4681.248781 0.582137941 0.2740890752 1.239005640 0.0336784590 128900430668598  | ENSMUST00000171226 | NA                  | NA            |
| ENSMUST00000153446 | 3330.5239320 5.46749555 0.2574347152 1.23837790 0.0336837160 128913179441457   | ENSMUST00000153446 | ENSMUSG00000030530  | Furin         |
| ENSMUST00000031129 | 9104.352181 0.389758067 0.1835348912 1.236183780 0.0337020670 128968659732649  | ENSMUST00000031129 | NA                  | NA            |
| ENSMUST00000101649 | 1791.140053 0.345602858 0.1627419732 1.236246040 0.0337015460 128968659732649  | ENSMUST00000101649 | ENSMUST00000101649  | NA            |
| ENSMUST00000176158 | 4286.516748 -0.367211085 0.172820450 -2.12358256 0.0337050640 128972754193577  | ENSMUST00000176158 | ENSMUSG00000030879  | Mrpl17        |
| ENSMUST00000143206 | 2332.899223 -0.28885716 0.136028217 -2.12350917 0.033711207 0.12897485517651   | ENSMUST00000143206 | ENSMUSG000000053768 | Chchd3        |
| ENSMUST00000006139 | 7354.517380 0.377643938 0.1778416742 1.234839290 0.0337133200 128974845517651  | ENSMUST00000006139 | ENSMUSG00000049516  | Spty2d1       |
| ENSMUST00000134667 | 8499.463703 0.399884870 0.188313572 1.235077310 0.033713280 128974845517651    | ENSMUST00000134667 | ENSMUSG00000024807  | Synn1         |
| ENSMUST00000173286 | 8522.240339 -0.43957246 0.207005042 -2.12348674 0.0337130850 128974845517651   | ENSMUST00000173286 | ENSMUSG00000036990  | Otd4d         |
| ENSMUST00000107453 | 3133.757953 -0.59226892 0.278928165 -2.12337439 0.0337224900 12900251382691    | ENSMUST00000107453 | ENSMUSG00000025790  | Sleo3a1       |
| ENSMUST00000135856 | 68.29924112 -0.92933461 0.437688208 -2.12327998 0.0337303960 129025418570301   | ENSMUST00000135856 | ENSMUSG00000062168  | Ppef1         |
| ENSMUST00000036043 | 10.01413800 -0.95004210 0.447453610 -2.12321920 0.0337354870 129037514880024   | ENSMUST00000036043 | ENSMUSG00000036043  | Slitrk2       |
| ENSMUST00000139884 | 20.88912760 -0.96184170 0.453032150 -2.12312019 0.0337437810 129060781654511   | ENSMUST00000139884 | ENSMUSG00000008539  | 1700003M07rik |
| ENSMUST00000129289 | 1195.676333 -0.462472640 0.217828894 -2.12310054 0.0337454270 129060781654511  | ENSMUST00000129289 | ENSMUSG00000070544  | Top1          |
| ENSMUST00000021843 | 4477.558268 -0.49101009 0.231292406 -2.12289758 0.0337624340 129113357562374   | ENSMUST00000021843 | ENSMUSG00000046949  | Nqo2          |
| ENSMUST00000165275 | 1696.7793340 3.48146183 0.1639963022 1.22890448 0.0337630330 129113357562374   | ENSMUST00000165275 | NA                  | NA            |
| ENSMUST00000144948 | 100.0596870 -0.72846810 0.343170004 -2.12276157 0.0337738350 129147288700867   | ENSMUST00000144948 | ENSMUSG00000035266  | Helq          |
| ENSMUST00000133197 | 2897.872353 -0.28355516 0.133583562 -2.12268003 0.0337806730 129166053962351   | ENSMUST00000133197 | ENSMUSG00000031919  | Nsf11c        |
| ENSMUST00000102993 | 12673.132900 3.67556196 0.1731595602 1.22644540 0.0337836490 129170052944262   | ENSMUST00000102993 | ENSMUSG00000039159  | Ube2h         |
| ENSMUST00000069763 | 701.6541816 -0.58107382 0.273759483 -2.12257056 0.0337898530 129218639247344   | ENSMUST00000069763 | ENSMUSG00000069763  | Lanc13        |
| ENSMUST00000153064 | 4918.292788 0.353974599 0.1667741332 1.224790230 0.0337953230 129208367796266  | ENSMUST00000153064 | NA                  | NA            |
| ENSMUST00000114076 | 26.754673180 8.887643380 0.4187443372 1.22451001 0.0337998830 12920997339714   | ENSMUST00000114076 | ENSMUSG000000150764 | Mfsd2b        |
| ENSMUST00000114284 | 3825.9726100 3.070638360 1.4468340622 1.22315508 0.0338112520 12921652556362   | ENSMUST00000114284 | ENSMUSG00000029101  | Rgs12         |
| ENSMUST00000168847 | 1901.482097 -0.404297790 0.190494145 -2.12236336 0.0338072350 12921652556362   | ENSMUST00000168847 | ENSMUSG000000168847 | Gtpbp3        |
| ENSMUST00000007754 | 1901.482097 -0.404297790 0.190494145 -2.12236336 0.0338072350 12921652556362   | ENSMUST00000007754 | ENSMUSG00000007610  | Gtpbp3        |
| ENSMUST00000164655 | 20573.62931 -0.33041310 0.155684706 -2.1232217 0.0338106920 12921652556362     | ENSMUST00000164655 | ENSMUSG000000164655 | Hnrrpc        |
| ENSMUST00000111610 | 20573.62931 -0.33041310 0.155684706 -2.1232217 0.0338106920 12921652556362     | ENSMUST00000111610 | ENSMUSG00000006073  | Hnrrpc        |
| ENSMUST00000174449 | 544.2550353 0.451127267 0.2125713512 1.223292580 0.0338176510 129233601334463  | ENSMUST00000174449 | ENSMUSG00000024422  | Dhx16         |
| ENSMUST00000173078 | 8534.214269 -0.43986280 0.207269004 -2.12218322 0.0338223540 129236813642611   | ENSMUST00000173078 | ENSMUSG00000036990  | Otd4d         |
| ENSMUST00000048457 | 8525.674299 -0.43974881 0.207213637 -2.12220015 0.0338209360 129236813642611   | ENSMUST00000048457 | NA                  | NA            |
| ENSMUST00000027777 | 5551.395155 -0.49579033 0.233635116 -2.12207114 0.0338317640 129258007485014   | ENSMUST00000027777 | ENSMUSG00000026496  | Parp1         |
| ENSMUST00000058978 | 4472.517530 -0.49043890 0.231111667 -2.12208629 0.0338304950 129258007485014   | ENSMUST00000058978 | ENSMUSG00000046949  | Nqo2          |
| ENSMUST00000042105 | 9326.741388 0.433552640 0.2043325802 1.21978880 0.0338546300 12933798693491    | ENSMUST00000042105 | ENSMUSG00000040435  | Ppp1r15a      |
| ENSMUST00000130859 | 53.25310266 -0.73575685 0.346773974 -2.12171878 0.0338613600 12935610833512    | ENSMUST00000130859 | ENSMUSG00000130859  | Gssos2        |
| ENSMUST00000111534 | 1596.495004 0.382332740 0.1802163522 1.215207990 0.0338779990 129404462297718  | ENSMUST00000111534 | NA                  | NA            |
| ENSMUST00000128258 | 10829.85131 0.415926803 0.1960504362 1.215295940 0.0338772600 129404462297718  | ENSMUST00000128258 | ENSMUSG00000072812  | Ahnak2        |
| ENSMUST00000123575 | 323.7909844 -0.42566675 0.200644259 -2.12149978 0.0338797650 129404462297718   | ENSMUST00000123575 | ENSMUSG00000020528  | Prpsap2       |
| ENSMUST00000131913 | 624.39417700 4.48337821 0.2113347662 1.214579510 0.0338832860 129451058819595  | ENSMUST00000131913 | ENSMUSG00000034042  | Gpbp111       |
| ENSMUST00000153423 | 290.3198318 -0.73821909 0.347982718 -2.12142458 0.0338860880 129413836940663   | ENSMUST00000153423 | ENSMUSG00000001517  | Foxm1         |
| ENSMUST00000139582 | 68.76673305 0.7663710180 0.3612691732 1.213296720 0.0338940680 129436929049755 | ENSMUST00000139582 | ENSMUSG00000035713  | Usp35         |
| ENSMUST00000156444 | 110.1371766 0.596337924 0.2811293942 1.212222410 0.0339031040 129464045814409  | ENSMUST00000156444 | ENSMUSG00000034429  | Zfp707        |
| ENSMUST00000144778 | 1748.237444 0.350980903 0.1654698312 1.211171930 0.0339119410 12949041808074   | ENSMUST00000144778 | ENSMUSG00000023764  | Sfi1          |
| ENSMUST00000057228 | 52.027027330 9.31234079 0.4343667412 1.210741780 0.0339155600 129496832152349  | ENSMUST00000057228 | ENSMUSG00000051242  | Pcdhb9        |
| ENSMUST00000107960 | 86.15406858 -0.79951795 0.376967397 -2.12092068 0.0339284770 129538759502087   | ENSMUST00000107960 | ENSMUSG00000020486  | sept-04       |
| ENSMUST00000153765 | 991.9390360 0.432455290 0.2039041072 1.208758140 0.0339322540 129545789905004  | ENSMUST00000153765 | ENSMUSG00000036339  | Tmem260       |
| ENSMUST00000026907 | 754.2385669 0.723810275 0.3412888192 1.208144930 0.0339374160 129552254429914  | ENSMUST00000026907 | ENSMUSG00000079057  | Cyp4v3        |
| ENSMUST00000102736 | 18008.68877 -0.33252467 0.156791376 -2.12080970 0.0339378190 129552254429914   | ENSMUST00000102736 | ENSMUSG00000053510  | Nrd1          |
| ENSMUST00000129506 | 57.90438702 -0.769127140 0.362699293 -2.12056420 0.0339584920 129616382545573  | ENSMUST00000129506 | ENSMUSG00000026923  | Notch1        |
| ENSMUST00000129628 | 1274.474160 -0.41450839 0.195468827 -2.12058569 0.0339566820 129616382545573   | ENSMUST00000129628 | ENSMUSG00000039483  | Asb6          |
| ENSMUST00000102766 | 446.59069310 4.25706935 0.2007585562 1.204921070 0.0339645660 129632171444668  | ENSMUST00000102766 | ENSMUSG00000020364  | Zfp354a       |
| ENSMUST00000044681 | 11505.232570 0.304319233 0.1432866592 1.202539150 0.0339846370 1297013798805   | ENSMUST00000044681 | ENSMUSG00000035190  | Arfip65       |
| ENSMUST00000065977 | 18276.20695 0.33259862 0.156883712 1.20032840 0.0340032750 12976139255549      | ENSMUST00000065977 | ENSMUSG00000053510  | Nrd1          |
| ENSMUST00000028676 | 610.0742054 -0.57909699 0.273156202 -2.12002139 0.0340044020 12976139255549    | ENSMUST00000028676 | ENSMUSG00000027242  | Wdr76         |
| ENSMUST00000144845 | 10229.56867 0.3473944190 1.638668032 1.199804410 0.0340076940 1297617314097    | ENSMUST00000144845 | ENSMUSG00000027447  | Cst3          |
| ENSMUST00000144247 | 1051.854763 0.335016700 0.1580330572 1.199153210 0.0340131870 12977330900438   | ENSMUST00000144247 | ENSMUSG00000037486  | Asx1d         |
| ENSMUST00000021530 | 51074.367840 4.74151800 0.2236647452 1.199219350 0.0340126290 12977330900438   | ENSMUST00000021530 | ENSMUSG00000021109  | Hif1a         |
| ENSMUST00000139886 | 4818.567621 -0.31717274 0.149644308 -2.11951091 0.0340473120 129896126877119   | ENSMUST00000139886 | ENSMUSG00000009079  | Ewsr1         |
| ENSMUST0000018993  | 294.8413758 -0.71565015 0.337654708 -2.11947333                                |                    |                     |               |

|                    |                                                                                            |                    |                      |           |
|--------------------|--------------------------------------------------------------------------------------------|--------------------|----------------------|-----------|
| ENSMUST00000154349 | 724.3388357 - 0.60130426 - 0.284115322 - 2.11640914 - 0.034310025 - 0.13063759575052       | ENSMUST00000154349 | ENSMUSG000000045751  | Mms22l    |
| ENSMUST00000078369 | 9.155922857 - 0.96092273 - 0.454056815 - 2.11630506 - 0.034318870 - 0.130649115049508      | ENSMUST00000078369 | ENSMUSG000000061615  | Hist1h2ab |
| ENSMUST00000139029 | 2556.306005 - 0.564175022 - 0.266599126 - 2.116192309 - 0.034328454 - 0.130659912611       | ENSMUST00000139029 | ENSMUSG00000004631   | Sgce      |
| ENSMUST00000123355 | 919.7011694 - 0.63160505 - 0.298461320 - 2.11620405 - 0.034327456 - 0.130659912611         | ENSMUST00000123355 | ENSMUSG000000036854  | Hspb6     |
| ENSMUST00000048762 | 177.9234321 - 0.936936263 - 0.442753226 - 2.116159087 - 0.0343312790 - 0.130659912611      | ENSMUST00000048762 | ENSMUSG000000042254  | Cilp      |
| ENSMUST00000094637 | 177.9234321 - 0.936936263 - 0.442753226 - 2.116159087 - 0.0343312790 - 0.130659912611      | NA                 | ENSMUST00000094637   | NA        |
| ENSMUST00000141382 | 177.9234321 - 0.936936263 - 0.442753226 - 2.116159087 - 0.0343312790 - 0.130659912611      | ENSMUST00000141382 | ENSMUSG000000042254  | Cilp      |
| ENSMUST00000156338 | 1564.396314 - 0.50182488 - 0.237144040 - 2.11611847 - 0.0343347320 - 0.130664902140969     | ENSMUST00000156338 | ENSMUSG000000022503  | Nubp1     |
| ENSMUST0000040336  | 523.2105688 - 0.82594522 - 0.390335527 - 2.11598783 - 0.034345842 - 0.130692317059591      | ENSMUST0000040336  | ENSMUSG000000038267  | Slc22a23  |
| ENSMUST0000099591  | 523.2105688 - 0.82594522 - 0.390335527 - 2.11598783 - 0.034345842 - 0.130692317059591      | NA                 | ENSMUST0000099591    | NA        |
| ENSMUST00000170496 | 1285.721607 - 0.40618235 - 0.191980680 - 2.11574598 - 0.034366416 - 0.130763170786275      | ENSMUST00000170496 | ENSMUSG000000054099  | Slc25a40  |
| ENSMUST00000156564 | 170.5508167 - 0.61133783 - 0.288949953 - 2.11572220 - 0.034368440 - 0.130763437172513      | ENSMUST00000156564 | ENSMUSG00000001864   | Airf1l    |
| ENSMUST00000060864 | 2653.992411 - 0.44133307 - 0.208606001 - 2.11562982 - 0.034376303 - 0.130785915661481      | ENSMUST00000060864 | ENSMUSG000000028458  | Testk1    |
| ENSMUST00000138611 | 1269.798542 - 0.38619421 - 0.182568239 - 2.11534170 - 0.0344008340 - 0.130871279755971     | ENSMUST00000138611 | ENSMUSG000000084799  | Ino8Ddos  |
| ENSMUST00000169767 | 90.28471854 - 0.90677474 - 0.428670173 - 2.11532036 - 0.0344026520 - 0.130871279755971     | ENSMUST00000169767 | ENSMUSG000000019214  | Chf1f8    |
| ENSMUST00000101010 | 8729.965288 - 0.424300071 - 0.200591234 - 2.115247317 - 0.0344088730 - 0.130887507307774   | ENSMUST00000101010 | ENSMUSG000000072812  | Ahnak2    |
| ENSMUST00000102547 | 2072.285122 - 0.28162099 - 0.133140987 - 2.11520888 - 0.0344121480 - 0.130892521141522     | ENSMUST00000102547 | ENSMUSG000000044042  | Fmn1      |
| ENSMUST00000126065 | 5777.018955 - 0.439742926 - 0.207898566 - 2.115180177 - 0.0344145930 - 0.130894385254923   | ENSMUST00000126065 | ENSMUSG00000005580   | Rnf181    |
| ENSMUST00000024882 | 2626.644217 - 0.40178452 - 0.189966521 - 2.11502805 - 0.034427555 - 0.1309362424709        | ENSMUST00000024882 | ENSMUSG000000024078  | Ttc27     |
| ENSMUST00000122286 | 1976.3145310 - 0.559900074 - 0.264729897 - 2.114986180 - 0.0344311250 - 0.130937160447973  | ENSMUST00000122286 | ENSMUSG000000039114  | Nrn1      |
| ENSMUST00000153098 | 1481.024287 - 0.680768802 - 0.321879651 - 2.114979311 - 0.0344317100 - 0.130937160447973   | ENSMUST00000153098 | ENSMUSG000000056427  | Slit3     |
| ENSMUST00000155702 | 5036.470182 - 0.46428214 - 0.21954553 - 2.11474193 - 0.0344519480 - 0.131066157969874      | ENSMUST00000155702 | ENSMUSG000000015702  | Tsr1      |
| ENSMUST00000145614 | 1993.060916 - 0.48023362 - 0.227090820 - 2.11472057 - 0.034453769 - 0.131066157969874      | ENSMUST00000145614 | ENSMUSG0000000145614 | Mrps26    |
| ENSMUST00000148368 | 213.1925116 - 0.53647112 - 0.280738217 - 2.11459315 - 0.0344646370 - 0.131033965532323     | ENSMUST00000148368 | ENSMUSG000000042744  | Gen15800  |
| ENSMUST00000096514 | 3535.851430 - 0.367758810 - 0.173915510 - 2.114588913 - 0.0344649990 - 0.131033965532323   | ENSMUST00000096514 | ENSMUSG000000031156  | Slc35a2   |
| ENSMUST00000171554 | 2612.908259 - 0.34320955 - 0.162310669 - 2.11452243 - 0.034470670 - 0.131048082114653      | ENSMUST00000171554 | ENSMUSG000000034271  | Jdp2      |
| ENSMUST00000155287 | 3326.471670 - 0.365292539 - 0.172783658 - 2.114613890 - 0.034501485 - 0.131153199282805    | ENSMUST00000155287 | ENSMUSG000000003363  | Plp3      |
| ENSMUST00000131698 | 238.2461061 - 0.44599512 - 0.210956926 - 2.11415254 - 0.0345022400 - 0.131153199283095     | ENSMUST00000131698 | ENSMUSG000000027333  | Smox      |
| ENSMUST00000071590 | 7170.326250 - 0.3001154780 - 0.141958172 - 2.114112016 - 0.034505701 - 0.131158751677751   | ENSMUST00000071590 | ENSMUSG000000030779  | Rbbp6     |
| ENSMUST00000036467 | 88.05464960 - 0.747664082 - 0.353657719 - 2.1140895330 - 0.0345076200 - 0.131158751677751  | ENSMUST00000036467 | ENSMUSG000000034768  | Ash16     |
| ENSMUST00000137793 | 7050.973440 - 0.347929903 - 0.164585152 - 2.113981106 - 0.0345168801 - 0.13118646592212    | ENSMUST00000137793 | ENSMUSG000000042626  | Shc1      |
| ENSMUST00000146204 | 612.8284655 - 0.347128991 - 0.164209518 - 2.1139395230 - 0.0345204320 - 0.131192545034361  | ENSMUST00000146204 | ENSMUSG000000039671  | Zmynd8    |
| ENSMUST00000135585 | 3125.291870 - 0.41120855 - 0.194528382 - 2.11387434 - 0.0345260410 - 0.131206254706741     | ENSMUST00000135585 | ENSMUSG0000000135585 | Rbbp4     |
| ENSMUST00000123973 | 2468.043347 - 0.584501866 - 0.276513717 - 2.1138259330 - 0.0345301370 - 0.13120700438892   | ENSMUST00000123973 | ENSMUSG000000073599  | Eccsr     |
| ENSMUST00000029085 | 1245.971715 - 0.34880200 - 0.165008753 - 2.11383938 - 0.0345289870 - 0.13120700438892      | ENSMUST00000029085 | ENSMUSG000000029805  | Mrgbp     |
| ENSMUST00000110437 | 2029.302707 - 0.36787501 - 0.174043496 - 2.11369586 - 0.0345412520 - 0.131241853087688     | ENSMUST00000110437 | ENSMUSG000000023330  | Dtwd1     |
| ENSMUST00000111564 | 9137.138217 - 0.302792259 - 0.143258675 - 2.1136050510 - 0.0345496140 - 0.13125643936172   | ENSMUST00000111564 | ENSMUSG000000049550  | Cilp1     |
| ENSMUST00000123086 | 52.00541810 - 0.89022798 - 0.421188807 - 2.11360789 - 0.0345487700 - 0.13125643936172      | ENSMUST00000123086 | ENSMUSG000000026315  | Serpinh8  |
| ENSMUST00000112106 | 447.3615305 - 0.444253080 - 0.210129303 - 2.11354937 - 0.0345537730 - 0.13126706882463     | ENSMUST00000112106 | ENSMUSG000000042323  | Pbrm1     |
| ENSMUST00000167273 | 9354.8790370 - 0.431987013 - 0.204402763 - 2.1134108280 - 0.0345656190 - 0.131297165022441 | ENSMUST00000167273 | ENSMUSG000000040435  | Ppp1r15a  |
| ENSMUST00000141691 | 9354.8790370 - 0.431987013 - 0.204402763 - 2.1134108280 - 0.0345656190 - 0.131297165022441 | NA                 | ENSMUST00000141691   | NA        |
| ENSMUST00000159389 | 711.15944800 - 0.466121805 - 0.220561328 - 2.1134343010 - 0.034571395 - 0.13131164788828   | ENSMUST00000159389 | ENSMUSG000000038425  | Polii     |
| ENSMUST00000148795 | 5035.233125 - 0.28267456 - 0.133760861 - 2.11328304 - 0.0345765480 - 0.131323768700681     | ENSMUST00000148795 | ENSMUSG000000020936  | Nmt1      |
| ENSMUST00000020018 | 4938.897067 - 0.279209720 - 0.132132581 - 2.11310273 - 0.0345919750 - 0.131374904329589    | ENSMUST00000020018 | ENSMUSG000000019868  | Vta1      |
| ENSMUST00000137426 | 16047.54552 - 0.29384370 - 0.139062083 - 2.11303971 - 0.0345973680 - 0.131382012607154     | ENSMUST00000137426 | ENSMUSG000000055762  | Eef1d     |
| ENSMUST00000135169 | 1889.792887 - 0.959375131 - 0.454027093 - 2.1130349820 - 0.0345977730 - 0.131382012607154  | ENSMUST00000135169 | ENSMUSG000000028965  | Tnfrsf9   |
| ENSMUST00000125113 | 3517.8597330 - 0.288521675 - 0.136570775 - 2.112616505 - 0.0346336040 - 0.131505972279229  | ENSMUST00000125113 | ENSMUSG0000000125113 | Samd4     |
| ENSMUST00000124983 | 685.7482883 - 0.58394300 - 0.276416318 - 2.11254893 - 0.0346393920 - 0.131505972279229     | ENSMUST00000124983 | ENSMUSG000000034349  | Smc4      |
| ENSMUST00000173147 | 1276.706597 - 0.43084948 - 0.203948605 - 2.11253948 - 0.0346402020 - 0.131505972279229     | ENSMUST00000173147 | ENSMUSG0000000173147 | Flot1     |
| ENSMUST00000105846 | 2543.536316 - 0.523884264 - 0.247987970 - 2.112539019 - 0.0346402420 - 0.131505972279229   | ENSMUST00000105846 | ENSMUSG000000028664  | Ephb2     |
| ENSMUST00000151896 | 1064.665361 - 0.354669324 - 0.167884218 - 2.112582880 - 0.0346364850 - 0.131505972279229   | ENSMUST00000151896 | ENSMUSG000000051896  | Ube4bos1  |
| ENSMUST00000141213 | 455.2656686 - 0.372832000 - 0.176492500 - 2.11245237 - 0.0346476660 - 0.131526695031196    | ENSMUST00000141213 | ENSMUSG000000073468  | Sft2d1    |
| ENSMUST00000127275 | 64.93353671 - 0.692065672 - 0.327631533 - 2.1123292570 - 0.0346582180 - 0.131559285117962  | ENSMUST00000127275 | NA                   | NA        |
| ENSMUST00000127538 | 201.7776824 - 0.79735444 - 0.377501007 - 2.11219155 - 0.0346700220 - 0.131589163706689     | ENSMUST00000127538 | ENSMUSG000000031304  | Il2rg     |
| ENSMUST00000125730 | 138.2226867 - 0.610663690 - 0.289113462 - 2.1121938940 - 0.034668210 - 0.131589163706689   | ENSMUST00000125730 | ENSMUSG000000019823  | Mical1    |
| ENSMUST00000169656 | 37.52043222 - 0.93793562 - 0.444103282 - 2.11197634 - 0.0346884780 - 0.131651747383739     | ENSMUST00000169656 | ENSMUSG000000034532  | Fbxo16    |
| ENSMUST00000147402 | 13.62265937 - 0.923783990 - 0.437407610 - 2.11195227 - 0.0346905430 - 0.13165211935629     | ENSMUST00000147402 | ENSMUSG000000075256  | Cerkl     |
| ENSMUST00000153754 | 411.6367135 - 0.360968530 - 0.174754622 - 2.11192433 - 0.0346929390 - 0.13165374565224     | ENSMUST00000153754 | ENSMUSG000000054720  | Lrrc8c    |
| ENSMUST00000145816 | 1424.213348 - 0.34638174 - 0.164016256 - 2.11187445 - 0.0346972180 - 0.131662516348017     | ENSMUST00000145816 | ENSMUSG0000000145816 | Gtf2a2    |
| ENSMUST00000088237 | 215.2335875 - 0.505217040 - 0.239234766 - 2.11180654 - 0.0347030450 - 0.131677160781949    | ENSMUST00000088237 | ENSMUSG000000072437  | Nanos1    |
| ENSMUST00000174330 | 534.1182734 - 0.451101472 - 0.2136166182 - 2.1117339830 - 0.0347092720 - 0.13169320512255  | ENSMUST00000174330 | ENSMUSG0000000174330 | Dhx16     |
| ENSMUST00000144918 | 16982.53782 - 0.27745322 - 0.131392430 - 2.11163785 - 0.0347175230 - 0.1317175425269       | ENSMUST00000144918 | ENSMUSG000000025393  | Atp5b     |
| ENSMUST00000133016 | 3193.447218 - 0.50917966 - 0.241139720 - 2.11155451 - 0.0347246770 - 0.131736831896767     | ENSMUST00000133016 | ENSMUSG0000000133016 | Nat10     |
| ENSMUST00000099396 | 4501.871570 - 0.38499204 - 0.182342413 - 2.11136860 - 0.034740641 - 0.131789923640109      | ENSMUST00000099396 | ENSMUSG000000054027  | Nt5dc3    |
| ENSMUST00000107183 | 257.1177891 - 0.474968647 - 0.224966441 - 2.111286660 - 0.0347476790 - 0.131809151529215   | ENSMUST00000107183 | ENSMUSG000000017183  | Anxa9     |
| ENSMUST00000073089 | 1195.315157 - 0.350342935 - 0.165940875 - 2.1112515770 - 0.0347506930 - 0.131813111871358  | ENSMUST00000073089 | ENSMUSG000000054942  | Fam73a    |
| ENSMUST00000152518 | 1440.592790 - 0.38922756 - 0.184370701 - 2.11113396 - 0.0347625170 - 0.131850485734055     | ENSMUST00000152518 | ENSMUSG0000000152518 | Wdr73     |
| ENSMUST00000054344 | 3359.623085 - 0.348835860 - 0.165246135 - 2.11100767 - 0.0347716520 - 0.131866085525754    | ENSMUST00000054344 | ENSMUSG000000054344  | Eogt      |
| ENSMUST00000162534 | 1357.239406 - 0.588382330 - 0.278719267 - 2.11102139 - 0.0347704720 - 0.131866085525754    | ENSMUST00000162534 | ENSMUSG0000000162534 | Ermr1     |
| ENSMUST00000022287 | 3861.965093 - 0.48116402 - 0.227934561 - 2.11097440 - 0.0347745120 - 0.131866085525754     | ENSMUST00000022287 | ENSMUSG000000022287  | Fst       |
| ENSMUST00000174474 | 258.1087808 - 0.72650224 - 0.344154432 - 2.11097744 - 0.0347742500 - 0.131866085525754     | ENSMUST00000174474 | ENSMUSG0000000174474 | NA        |
| ENSMUST00000063445 | 52.45185698 - 0.913233048 - 0.432617235 - 2.1109492940 - 0.0347766700 - 0.13186679910634   | ENSMUST00000063445 | ENSMUSG000000063445  | Catsperg1 |
| ENSMUST00000061856 | 2797.163059 - 0.348444418 - 0.165068192 - 2.110911936 - 0.0347766700 - 0.131871500204236   | ENSMUST00000061856 | ENSMUSG0000000204978 | Gpam      |
| ENSMUST00000163744 | 20.56243878 - 0.95515215 - 0.452507353 - 2.11079918 - 0.0347895760 - 0.131900786056194     | ENSMUST00000163744 | ENSMUSG0000000163744 | NA        |
| ENSMUST00000109767 | 4233.450463 - 0.38467488 - 0.182253527 - 2.11065812 - 0.0348017707 - 0.13193304542119      | ENSMUST00000109767 | ENSMUSG0000000109767 | Ntm1      |
| ENSMUST00000050687 | 2613.654606 - 0.34257017 - 0.162307919 - 2.11061903 - 0.0348050700 - 0.131944578481174     | ENSMUST00000050687 | ENSMUSG000000050687  | Jdp2      |
| ENSMUST00000147420 | 101.1883144 - 0.66153676 - 0.313444415 - 2.11053932 - 0.0348119270 - 0.13196360910533      | ENSMUST00000147420 | ENSMUSG000000086544  | Chn1os3   |
| ENSMUST00000160248 | 661.35847420 - 0.346341529 - 0.164111403 - 2.1104502030 - 0.0348234840 - 0.13199942866748  | ENSMUST000001602   |                      |           |

|                    |                                                                                 |                    |                      |               |
|--------------------|---------------------------------------------------------------------------------|--------------------|----------------------|---------------|
| ENSMUST00000140325 | 1403.407624 -0.41762622-0.198146470-2.10766421-0.035060044-0.132588191722824    | ENSMUST00000140325 | ENSMUSG000000027472  | Pdrg1         |
| ENSMUST00000145891 | 612.4335639-0.34650643-0.164413517-2.10753010-0.035071655-0.13262406030967      | ENSMUST00000145891 | ENSMUSG000000044042  | Fmm1          |
| ENSMUST00000140902 | 561.0820400-0.39250155-0.186254997-2.10733435-0.035088607-0.132681213682893     | ENSMUST00000140902 | ENSMUSG000000029033  | Acap3         |
| ENSMUST00000171874 | 109.5417768-0.807316824-0.383121807-2.107206660-0.035099669-0.132715544050965   | ENSMUST00000171874 | ENSMUSG000000030109  | Slc6a12       |
| ENSMUST00000127649 | 1007.839531-0.29685920-0.140880702-2.10716724-0.035103085-0.132720960303498     | ENSMUST00000127649 | ENSMUSG000000022761  | Lztr1         |
| ENSMUST00000029649 | 1970.282787-0.491488885-0.233257038-2.107069901-0.035111520-0.132745531319165   | ENSMUST00000029649 | ENSMUSG000000029649  | Ctso          |
| ENSMUST00000108476 | 1695.335569-0.452656191-0.214845783-2.106888874-0.0351272130-0.13279717820221   | ENSMUST00000108476 | ENSMUSG000000059949  | Ctns          |
| ENSMUST00000019229 | 3202.715871-0.31657525-0.150265143-2.10677773-0.035136850-0.13282610681562      | ENSMUST00000019229 | ENSMUSG0000000019229 | Med8          |
| ENSMUST00000156072 | 852.3200448-0.343663313-0.163140617-2.106546599-0.035156899-0.13288248146496    | ENSMUST00000156072 | ENSMUSG000000009995  | Taz           |
| ENSMUST00000174063 | 257.2474565-0.629926685-0.299030405-2.106563990-0.035155390-0.13288248146496    | ENSMUST00000174063 | ENSMUSG0000000174063 | H2-T24        |
| ENSMUST00000303438 | 5162.357262-0.41693908-0.197926292-2.10653714-0.035157720-0.13288248146496      | ENSMUST00000303438 | ENSMUSG000000028676  | Srsf10        |
| ENSMUST00000132408 | 880.3918399-0.437289830-0.207596224-2.106444046-0.035165798-0.132905507441033   | ENSMUST00000132408 | ENSMUST00000132408   | Pisd-ps1      |
| ENSMUST00000148618 | 2796.561755-0.35905013-0.170455781-2.10641218-0.035168563-0.132908450090154     | ENSMUST00000148618 | ENSMUSG00000057541   | Pus7          |
| ENSMUST00000166463 | 71.65277194-0.91235718-0.433139182-2.10638339-0.035171062-0.132908646068573     | ENSMUST00000166463 | ENSMUST00000166463   | Ngef          |
| ENSMUST00000356862 | 360.8705171-0.508230102-0.241285543-2.10634294-0.0351745730-0.132908646068573   | ENSMUST00000356862 | ENSMUSG00000022773   | Ypel1         |
| ENSMUST00000153402 | 39.57899696-0.829120787-0.393628212-2.106355088-0.0351735190-0.132908646068573  | ENSMUST00000153402 | ENSMUST00000153402   | 9630028H03Rik |
| ENSMUST00000092244 | 9695.738465-0.287899843-0.136684242-2.106313339-0.0351771430-0.132910850644834  | ENSMUST00000092244 | NA                   |               |
| ENSMUST00000148964 | 8.525467848-0.848270040-0.402733459-2.10628151-0.035179906-0.132913784714523    | ENSMUST00000148964 | ENSMUSG000000020787  | P2rxn1        |
| ENSMUST00000176250 | 24460.69334-0.383219457-0.181951988-2.106157018-0.0351907150-0.13294711729513   | ENSMUST00000176250 | ENSMUSG00000032336   | Nptrn         |
| ENSMUST00000133845 | 739.2219501-0.50725070-0.240845111-2.10612828-0.0351932100-0.132949037363672    | ENSMUST00000133845 | ENSMUSG000000035266  | Helq          |
| ENSMUST00000128086 | 842.1030144-0.44629680-0.211910053-2.10606716-0.0351985180-0.132952417224613    | ENSMUST00000128086 | ENSMUSG000000026127  | Imp4          |
| ENSMUST00000098761 | 16.63391510-0.95377277-0.452848576-2.10606331-0.0351988530-0.132952417224613    | ENSMUST00000098761 | ENSMUSG000000098761  | Kcnd3         |
| ENSMUST00000143017 | 3181.352999-0.50928712-0.241821079-2.10604935-0.035200065-0.132952417224613     | ENSMUST00000143017 | ENSMUSG000000027185  | Nat10         |
| ENSMUST00000170959 | 399.4801307-0.82515472-0.391837645-2.10585871-0.035216626-0.133007461821354     | ENSMUST00000170959 | ENSMUSG000000067140  | Kif5b         |
| ENSMUST00000113557 | 4136.668180-0.382062495-0.181433956-2.105793767-0.035222770-0.133021270704981   | ENSMUST00000113557 | ENSMUSG000000037792  | Atg7a         |
| ENSMUST00000155668 | 858.1250557-0.44666798-0.211212414-2.10570850-0.035229676-0.13304173246757      | ENSMUST00000155668 | ENSMUSG000000024516  | Sec11c        |
| ENSMUST00000138155 | 53.64365356-0.823080819-0.390895430-2.105629162-0.0352365770-0.133060283621648  | ENSMUST00000138155 | ENSMUSG0000000138155 | Ido2          |
| ENSMUST00000102936 | 2204.153194-0.41972291-0.199339413-2.10556912-0.0352417970-0.133072484848117    | ENSMUST00000102936 | ENSMUSG000000028479  | Gne           |
| ENSMUST00000138657 | 422.1836326-0.569305746-0.270387652-2.105516807-0.035246450-0.133074642791119   | ENSMUST00000138657 | ENSMUSG000000019823  | Mical1        |
| ENSMUST00000073556 | 761.8058738-0.716711089-0.340393653-2.105535992-0.0352446770-0.133074642791119  | ENSMUST00000073556 | ENSMUSG000000043557  | Mdga1         |
| ENSMUST00000163376 | 250.3875176-0.457645639-0.217358487-2.105487784-0.035248869-0.13307662935791    | ENSMUST00000163376 | ENSMUSG000000026261  | Rabl2         |
| ENSMUST00000141007 | 531.2026760-0.45353550-0.215414438-2.10540902-0.0352557180-0.133095031190136    | ENSMUST00000141007 | ENSMUSG000000028744  | Pqlc2         |
| ENSMUST00000167287 | 132.4220170-0.624339818-0.296550781-2.105338636-0.0352618410-0.13310615915913   | ENSMUST00000167287 | ENSMUSG0000000167287 | Cdc24         |
| ENSMUST00000133683 | 2064.921130-0.362466416-0.172264624-2.10527358-0.0352674990-0.133124467776633   | ENSMUST00000133683 | ENSMUSG000000058833  | 281042815Rik  |
| ENSMUST00000156554 | 256.6123311-0.49046912-0.232983671-2.105165210-0.0352769290-0.13315250021788    | ENSMUST00000156554 | ENSMUSG0000000156554 | Far1          |
| ENSMUST00000001044 | 5546.2337510-0.459942033-0.218486195-2.105130861-0.0352799180-0.133156321970653 | ENSMUST00000001044 | NA                   | NA            |
| ENSMUST00000125370 | 4210.179329-0.38508095-0.182935249-2.10501231-0.0352902360-0.13318775100625     | ENSMUST00000125370 | ENSMUSG000000001909  | Trmt1         |
| ENSMUST00000163085 | 3952.379416-0.30394127-0.144394665-2.10493420-0.0352970350-0.133205901532636    | ENSMUST00000163085 | ENSMUSG000000019795  | Pcmt1         |
| ENSMUST00000021699 | 724.92279530-0.390870577-0.185698721-2.104864125-0.0353031370-0.133221414204241 | ENSMUST00000021699 | NA                   |               |
| ENSMUST00000065815 | 200.0554106-0.650742204-0.3091735592-0.104779616-0.0353104960-0.133241670926699 | ENSMUST00000065815 | ENSMUSG000000020251  | Glt8d2        |
| ENSMUST00000030709 | 198.6179443-0.72767449-0.345746166-2.10464949-0.0353218380-0.133276922920468    | ENSMUST00000030709 | ENSMUSG000000030709  | Smpd13b       |
| ENSMUST00000052499 | 1785.432640-0.48227203-0.229156326-2.10455473-0.035330085-0.133300555922471     | ENSMUST00000052499 | ENSMUSG000000051518  | Rps19bp1      |
| ENSMUST00000127530 | 6762.3913390-0.348973421-0.165823928-2.104481690-0.0353364500-0.133317052852678 | ENSMUST00000127530 | ENSMUSG0000000127530 | Grn           |
| ENSMUST00000159555 | 2375.2369260-0.357174665-0.1697371192-0.104281415-0.035353906-0.133367872940299 | ENSMUST00000159555 | ENSMUSG000000056870  | Gulp1         |
| ENSMUST00000151286 | 130.1772040-0.59021489-0.280482383-2.10428508-0.035353586-0.133367872940299     | ENSMUST00000151286 | ENSMUSG000000063450  | Syne2         |
| ENSMUST00000138463 | 112.0043908-0.679996893-0.323154973-2.104243932-0.0353571740-0.13337681722574   | ENSMUST00000138463 | ENSMUSG000000028766  | Alpl          |
| ENSMUST00000108535 | 521.1706746-0.403521957-0.191794231-2.103931670-0.035384407-0.133467888168453   | ENSMUST00000108535 | ENSMUSG000000108535  | Zfp446        |
| ENSMUST00000143172 | 6399.443438-0.717650205-0.341107614-2.103882104-0.0353887320-0.133469153824552  | ENSMUST00000143172 | ENSMUSG000000032359  | Ctsh          |
| ENSMUST00000153603 | 186.9204403-0.496014486-0.235760509-2.103891308-0.0353879290-0.133469153824552  | ENSMUST00000153603 | ENSMUSG0000000153603 | Patz1         |
| ENSMUST00000147306 | 1181.946836-0.417951900-0.198686540-2.10357430-0.0354155970-0.133562949310598   | ENSMUST00000147306 | ENSMUSG000000021645  | Smn1          |
| ENSMUST00000123255 | 489.9274693-0.823985421-0.391711835-2.1035499730-0.0354177210-0.133563432108144 | ENSMUST00000123255 | ENSMUSG0000000123255 | Socx3         |
| ENSMUST00000059954 | 1349.221056-0.501212537-0.238272535-2.1035262670-0.0354197910-0.133563710869708 | ENSMUST00000059954 | ENSMUSG000000059954  | Ptpr          |
| ENSMUST00000143545 | 827.7252578-0.51303714-0.243903260-2.10344520-0.0354268700-0.133582877256058    | ENSMUST00000143545 | ENSMUSG0000000143545 | Gar1          |
| ENSMUST00000134347 | 9.268909741-0.93133539-0.442782588-2.10336950-0.0354334820-0.133593901037825    | ENSMUST00000134347 | NA                   | NA            |
| ENSMUST00000099955 | 2994.861786-0.30530461-0.145150495-2.10336601-0.0354337860-0.133593901037825    | ENSMUST00000099955 | ENSMUSG000000009955  | Fam89b        |
| ENSMUST00000026264 | 6765.311024-0.275902140-0.131174275-2.10332506-0.0354373640-0.133599861359981   | ENSMUST00000026264 | ENSMUSG000000025234  | Arih1         |
| ENSMUST00000168948 | 925.9881640-0.43356533-0.206176878-2.10288050-0.0354762160-0.133731318849707    | ENSMUST00000168948 | ENSMUSG000000168948  | Gpaal1        |
| ENSMUST00000145038 | 64.01397013-0.92364950-0.439238669-2.10284196-0.0354795860-0.133731318849707    | ENSMUST00000145038 | ENSMUSG000000038267  | Slc22a23      |
| ENSMUST00000124718 | 2024.709121-0.399509931-0.189978921-2.1028697730-0.0354771540-0.133731318849707 | ENSMUST00000124718 | ENSMUSG0000000124718 | Tlcd2         |
| ENSMUST00000144590 | 2725.389793-0.51312614-0.244016405-2.10283463-0.0354802270-0.133731318849707    | ENSMUST00000144590 | ENSMUSG000000027185  | Nat10         |
| ENSMUST00000301048 | 104.8720106-0.732017640-0.348132054-2.10270105-0.0354919090-0.133767813272883   | ENSMUST00000301048 | ENSMUSG000000030148  | Kif24         |
| ENSMUST00000171821 | 797.2418576-0.373180760-0.177481161-2.1026499740-0.0354963780-0.133769590909737 | ENSMUST00000171821 | ENSMUSG000000002205  | Vrk3          |
| ENSMUST00000123142 | 393.3699107-0.507214332-0.241256342-2.1026551930-0.0354959210-0.133769590909737 | ENSMUST00000123142 | ENSMUSG0000000123142 | Celf2         |
| ENSMUST00000062264 | 7375.657874-0.38633749-0.183748211-2.10253744-0.0355062230-0.133799158455753    | ENSMUST00000062264 | ENSMUSG000000026434  | Nucks1        |
| ENSMUST00000045807 | 10369.63765-0.40239280-0.191389015-2.10248641-0.0355106880-0.133808450737286    | ENSMUST00000045807 | ENSMUSG000000045807  | Tsr1          |
| ENSMUST00000022257 | 2602.764694-0.33426766-0.158978920-2.1024596590-0.0355120790-0.133809737084628  | ENSMUST00000022257 | ENSMUSG00000002257   | Atxn7         |
| ENSMUST00000156226 | 21436.71651-0.34494079-0.164072223-2.10237166-0.0355203210-0.133831221064092    | ENSMUST00000156226 | ENSMUSG0000000156226 | Efl4g1        |
| ENSMUST00000116558 | 2991.557003-0.30441419-0.144798770-2.10232582-0.0355247440-0.133838093841866    | ENSMUST00000116558 | ENSMUSG000000024939  | Fam89b        |
| ENSMUST00000156587 | 44.70928294-0.81507091-0.387708184-2.10227935-0.0355288120-0.133846593755637    | ENSMUST00000156587 | ENSMUSG0000000156587 | Etla          |
| ENSMUST00000162493 | 44.97832636-0.829621218-0.394660203-2.102115215-0.0355431840-0.133885663475089  | ENSMUST00000162493 | ENSMUSG000000062493  | Oit3          |
| ENSMUST00000140764 | 237.958966-0.476661740-0.226751475-2.10213294-0.0355416310-0.133885663475089    | ENSMUST00000140764 | ENSMUSG0000000140764 | Pip5k1        |
| ENSMUST00000110191 | 1946.933165-0.38693334-0.184091210-2.10185668-0.0355658310-0.133963430634117    | ENSMUST00000110191 | ENSMUSG000000021360  | Gcmt2         |
| ENSMUST00000127486 | 306.3003683-0.80498564-0.383000628-2.10178675-0.0355719600-0.13397897454412     | ENSMUST00000127486 | ENSMUSG000000027486  | Myo10         |
| ENSMUST00000145108 | 133.9346550-0.784258420-0.346619528-2.101607613-0.0355876620-0.1340035714411909 | ENSMUST00000145108 | ENSMUSG000000025504  | Eps8i2        |
| ENSMUST00000059433 | 109.5799915-0.697236920-0.331857849-2.10149205-0.035579560-0.134061797410804    | ENSMUST00000059433 | ENSMUSG000000059433  | Pced1b        |
| ENSMUST00000163697 | 6703.115281-0.40430299-0.192393688-2.10143586-0.0356027220-0.1340711950116      | ENSMUST00000163697 | ENSMUSG0000000163697 | Mtdh          |
| ENSMUST00000098814 | 2737.709956-0.65505180-0.311732596-2.10132598-0.0356123590-0.1341009454881324   | ENSMUST00000098814 | ENSMUSG000000056394  | Lig1          |
| ENSMUST00000099195 | 1785.728192-0.3829755120-0.182261756-2.1012390060-0.0356199900-0.13412213314269 | ENSMUST00000099195 | ENSMUSG0000000099195 | Pde7a         |
| ENSMUST00000160069 | 1408.246492-0.310442215-0.147751102-2.101160710-0.0356307780-0.134155203611647  | ENSMUST00000160069 | ENSMUSG00000002553   | Maf1          |
| ENSMUST00000143715 | 84.88471148-0.726518849-0.345791323-2.1010326170-0.0356381030-0.134158364662008 | ENSMUST00000143715 | ENSMUSG000000088407  | 1700950J03Rik |
| ENSMUST00000132390 | 808.1598237-                                                                    |                    |                      |               |

|                     |                                                                                             |                     |                     |               |
|---------------------|---------------------------------------------------------------------------------------------|---------------------|---------------------|---------------|
| ENSMUST00000135619  | 1111.917591 - 0.40287739 - 0.19199027 - 2.09842604 - 0.035867526 - 0.134747649922265        | ENSMUST00000135619  | ENSMUSG000000018858 | lct1          |
| ENSMUST00000121455  | 1959.636190 - 0.43479208 - 0.207210024 - 2.09831588 - 0.035872500 - 0.13477230406305        | ENSMUST00000121455  | ENSMUST000000083899 | Gm12346       |
| ENSMUST00000045921  | 20.65150897 - 0.921149924 - 0.439029471 - 2.098150543 - 0.035891848 - 0.134819575802029     | ENSMUST00000045921  | ENSMUSG00000037336  | Mfsd2b        |
| ENSMUST0000023686   | 1807.652150 - 0.273981580 - 0.130583942 - 2.09812617 - 0.035894001 - 0.134852092373579      | ENSMUST0000023686   | ENSMUST000000022964 | Tmem50b       |
| ENSMUST00000167651  | 4484.112932 - 0.381500740 - 0.181839590 - 2.09800706 - 0.035904521 - 0.134852007761674      | ENSMUST00000167651  | NA                  | NA            |
| ENSMUST000000084575 | 86.23064922 - 0.79412393 - 0.378521926 - 2.09796019 - 0.035908662 - 0.134860021166091       | ENSMUST000000084575 | NA                  | NA            |
| ENSMUST00000133375  | 2310.793439 - 0.28547771 - 0.136084099 - 2.09780361 - 0.035922497 - 0.134896839157875       | ENSMUST00000133375  | ENSMUSG00000005378  | Chchd3        |
| ENSMUST00000138549  | 833.2843277 - 0.31213351 - 0.148790284 - 2.09780845 - 0.035922069 - 0.134896839157875       | ENSMUST00000138549  | ENSMUST000000138549 | Nudt5         |
| ENSMUST00000059045  | 2102.014529 - 0.43203113 - 0.205954089 - 2.09770602 - 0.035931121 - 0.134911622919269       | ENSMUST00000059045  | ENSMUSG00000034259  | Exosc4        |
| ENSMUST00000173773  | 414.2994142 - 0.44966822 - 0.214365790 - 2.09766783 - 0.0359344980 - 0.134911622919269      | ENSMUST00000173773  | ENSMUST000000173773 | Mtferf3       |
| ENSMUST00000120397  | 1569.130262 - 0.694202830 - 0.330939928 - 2.097670214 - 0.035934287 - 0.134911622919269     | ENSMUST00000120397  | ENSMUST00000120397  | Bdnf2         |
| ENSMUST00000171974  | 1569.130262 - 0.694202830 - 0.330939928 - 2.097670214 - 0.035934287 - 0.134911622919269     | ENSMUST00000171974  | NA                  | NA            |
| ENSMUST00000115846  | 1153.374140 - 0.3393343180 - 0.161791622 - 2.097354069 - 0.0359622430 - 0.135008214821853   | ENSMUST00000115846  | NA                  | NA            |
| ENSMUST00000152367  | 2638.242016 - 0.45348126 - 0.216221912 - 2.09729561 - 0.0359674140 - 0.135020052199293      | ENSMUST00000152367  | ENSMUSG00000027201  | Myef2         |
| ENSMUST00000032071  | 10188.41431 - 0.263054094 - 0.125430145 - 2.097215888 - 0.0359744680 - 0.135031382737371    | ENSMUST00000032071  | ENSMUST00000032071  | Dusp11        |
| ENSMUST00000151109  | 97.12907168 - 0.734068764 - 0.350020377 - 2.097217224 - 0.0359743500 - 0.135031382737371    | ENSMUST00000151109  | ENSMUST000000151109 | Dwxd1         |
| ENSMUST00000138453  | 396.6915676 - 0.72240268 - 0.344481483 - 2.09707261 - 0.035987147 - 0.1350524655639         | ENSMUST00000138453  | ENSMUST00000138453  | Lig1          |
| ENSMUST00000005507  | 11.31759591 - 0.91981991 - 0.438623304 - 2.09706119 - 0.0359881580 - 0.1350524655639        | ENSMUST00000005507  | ENSMUST00000005507  | Mlxip1        |
| ENSMUST00000111201  | 11.31759591 - 0.91981991 - 0.438623304 - 2.09706119 - 0.0359881580 - 0.1350524655639        | ENSMUST00000111201  | NA                  | NA            |
| ENSMUST00000172557  | 5532.263509 - 0.422516250 - 0.201479687 - 2.09706627 - 0.035987709 - 0.1350524655639        | ENSMUST00000172557  | ENSMUSG00000022194  | Pabpn1        |
| ENSMUST00000141617  | 24350.506220 - 0.382212184 - 0.182269362 - 2.0969634130 - 0.0359968140 - 0.13507734153581   | ENSMUST00000141617  | ENSMUST0000014121   | Nptn          |
| ENSMUST00000146175  | 1954.5986320 - 0.386599033 - 0.184365713 - 0.09613927 - 0.0360011950 - 0.135078665135082    | ENSMUST00000146175  | ENSMUST000000046175 | Nr2c2         |
| ENSMUST00000108886  | 14186.84098 - 0.389146483 - 0.1857590912 - 0.096306160 - 0.035997170 - 0.135078665135082    | ENSMUST00000108886  | ENSMUST00000108886  | Tnrip1        |
| ENSMUST00000136736  | 133.77884450 - 0.726506121 - 0.3464690912 - 0.0968858120 - 0.0360036840 - 0.135080431497487 | ENSMUST00000136736  | ENSMUST00000025504  | Eps8l2        |
| ENSMUST00000035120  | 10868.21887 - 0.95051075 - 0.453303089 - 2.09685478 - 0.0360064310 - 0.13508316396343       | ENSMUST00000035120  | ENSMUST00000035120  | Cck           |
| ENSMUST00000046182  | 401.29503190 - 0.57258673 - 0.218076902 - 2.096777180 - 0.0360133040 - 0.13509500047501     | ENSMUST00000046182  | NA                  | NA            |
| ENSMUST00000159009  | 747.1729074 - 0.70009512 - 0.33891622 - 2.096773570 - 0.0360136240 - 0.13509500047501       | ENSMUST00000159009  | ENSMUST000000050410 | Tcf19         |
| ENSMUST00000108885  | 14192.70895 - 0.388707826 - 0.185392751 - 2.096672194 - 0.0360226030 - 0.135110952188052    | ENSMUST00000108885  | ENSMUST00000020400  | Tnrip1        |
| ENSMUST00000155785  | 3401.951426 - 0.47563584 - 0.26854369 - 2.096657170 - 0.0360239330 - 0.135110952188052      | ENSMUST00000155785  | ENSMUST00000038335  | Tsr1          |
| ENSMUST00000028198  | 7451.5857750 - 0.277679071 - 0.132436280 - 2.096699418 - 0.0360201920 - 0.135110952188052   | ENSMUST00000028198  | ENSMUST00000026848  | Tor1b         |
| ENSMUST00000140890  | 433.5864560 - 0.375787360 - 0.179243071 - 2.09652376 - 0.0360357530 - 0.135147709451736     | ENSMUST00000140890  | ENSMUST00000073468  | Sft2d1        |
| ENSMUST000000068473 | 20.14156170 - 0.943931252 - 0.450242318 - 2.0964960730 - 0.0360382010 - 0.135148349147936   | ENSMUST000000068473 | ENSMUST00000055095  | Spink6        |
| ENSMUST00000154727  | 600.6287798 - 0.770645584 - 0.367594556 - 2.096453770 - 0.0360418140 - 0.135148349147936    | ENSMUST00000154727  | ENSMUST000000040624 | Plekhh1       |
| ENSMUST00000170908  | 2032.822600 - 0.365454700 - 0.174320047 - 2.09645347 - 0.0360419830 - 0.135148349147936     | ENSMUST00000170908  | ENSMUST0000023330   | Dtwd1         |
| ENSMUST000001061542 | 712.0822760 - 0.463715731 - 0.221198490 - 2.0963783730 - 0.0360486390 - 0.13516573490471    | ENSMUST000001061542 | ENSMUST000000161542 | Poli          |
| ENSMUST00000155332  | 410.95790940 - 0.548530460 - 0.216975878 - 2.0963300090 - 0.0360529260 - 0.135174234143907  | ENSMUST00000155332  | ENSMUST00000053263  | Gm12592       |
| ENSMUST00000138010  | 2175.578088 - 0.51002460 - 0.243368000 - 2.09622009 - 0.0360626700 - 0.1352031001406912     | ENSMUST00000138010  | ENSMUST000000138010 | H2afz         |
| ENSMUST000000082175 | 975.50665840 - 0.413378712 - 0.197214262 - 2.0960893380 - 0.0360742660 - 0.135221067479958  | ENSMUST000000082175 | ENSMUST000000082175 | Trimf8        |
| ENSMUST00000153395  | 9779.944974 - 0.30786351 - 0.146875265 - 2.096088240 - 0.0360743630 - 0.135221067479958     | ENSMUST00000153395  | ENSMUST00000153395  | Slc25a39      |
| ENSMUST00000141208  | 890.56417650 - 0.386714012 - 0.184489758 - 2.096127267 - 0.0360709020 - 0.135221067479958   | ENSMUST00000141208  | ENSMUST00000020220  | Vps13d        |
| ENSMUST000000046149 | 1974.882155 - 0.47833067 - 0.228203014 - 2.09607519 - 0.0360755210 - 0.135221067479958      | ENSMUST000000046149 | ENSMUST000000046149 | Mrps26        |
| ENSMUST00000036437  | 1943.316079 - 0.370490740 - 0.176760993 - 2.09599831 - 0.0360823400 - 0.135238332312348     | ENSMUST00000036437  | ENSMUST00000029486  | Mrp1          |
| ENSMUST00000159255  | 917.0243663 - 0.54305780 - 0.259096730 - 2.09596548 - 0.0360852520 - 0.135238332312348      | ENSMUST00000159255  | ENSMUST000000159255 | Mettl13       |
| ENSMUST00000029817  | 1568.5805230 - 0.694829611 - 0.331509807 - 2.0959549210 - 0.0360861890 - 0.135238332312348  | ENSMUST00000029817  | ENSMUST00000028167  | Bdh2          |
| ENSMUST00000111451  | 5281.993244 - 0.361914180 - 0.172683516 - 2.09582355 - 0.0360978460 - 0.135274439141443     | ENSMUST00000111451  | ENSMUST000000055046 | Celf1         |
| ENSMUST00000147950  | 1761.879218 - 0.333547790 - 0.159156833 - 2.095717740 - 0.0361072370 - 0.135302055011482    | ENSMUST00000147950  | ENSMUST00000030452  | Nipa2         |
| ENSMUST00000126040  | 42290.49599 - 0.28325892 - 0.135166520 - 2.09562936 - 0.0361150820 - 0.135323875569949      | ENSMUST00000126040  | ENSMUST000000126040 | Atp5b         |
| ENSMUST00000148345  | 108.3666972 - 0.712014825 - 0.339767477 - 2.095594405 - 0.0361181850 - 0.135327926591584    | ENSMUST00000148345  | ENSMUST00000047996  | Prrp1         |
| ENSMUST00000115729  | 61.05231707 - 0.700339606 - 0.334203988 - 2.0955453280 - 0.0361225430 - 0.13533667522475    | ENSMUST00000115729  | ENSMUST00000027225  | Ypel1         |
| ENSMUST0000079176   | 94.31094760 - 0.657974565 - 0.314014754 - 2.0953619410 - 0.0361388300 - 0.135374956909524   | ENSMUST0000079176   | ENSMUST00000030701  | Plekhh1       |
| ENSMUST00000107047  | 94.31094760 - 0.657974565 - 0.314014754 - 2.0953619410 - 0.0361388300 - 0.135374956909524   | ENSMUST00000107047  | ENSMUST00000030701  | Plekhh1       |
| ENSMUST00000110461  | 50703.589460 - 0.477477732 - 0.227872211 - 2.0953749880 - 0.0361376710 - 0.135374956909524  | ENSMUST00000110461  | ENSMUST00000021100  | Hif1a         |
| ENSMUST00000134370  | 441.80003300 - 0.6637175160 - 0.316793435 - 2.0951113310 - 0.0361609600 - 0.135450785424266 | ENSMUST00000134370  | ENSMUST00000036009  | Fam65b        |
| ENSMUST00000152922  | 1001.869324 - 0.38033289 - 0.181536454 - 2.09507723 - 0.0361641260 - 0.135454552894699      | ENSMUST00000152922  | ENSMUST000000616316 | Prpf40a       |
| ENSMUST00000125821  | 2179.977141 - 0.50981366 - 0.243344544 - 2.09502812 - 0.0361684920 - 0.13546323207894       | ENSMUST00000125821  | ENSMUST00000032894  | H2afz         |
| ENSMUST00000153751  | 686.608998 - 0.40142754 - 0.191616825 - 2.09494934 - 0.0361754950 - 0.135466806963108       | ENSMUST00000153751  | ENSMUST00000066621  | Tecpr1        |
| ENSMUST00000043922  | 519.3627498 - 0.394678077 - 0.188393553 - 2.0949659390 - 0.0361740200 - 0.135466806963108   | ENSMUST00000043922  | ENSMUST00000038895  | Zfp653        |
| ENSMUST00000129711  | 1848.291360 - 0.35588560 - 0.169875879 - 2.09497430 - 0.0361732760 - 0.135466806963108      | ENSMUST00000129711  | ENSMUST00000065990  | Aurkap1       |
| ENSMUST00000136445  | 4307.317824 - 0.37561428 - 0.179299776 - 2.09489544 - 0.0361802870 - 0.135471687229514      | ENSMUST00000136445  | ENSMUST00000136445  | Phlda3        |
| ENSMUST00000125240  | 27.60914704 - 0.896842170 - 0.428129919 - 2.09478977 - 0.0361896840 - 0.1355047737595057    | ENSMUST00000125240  | ENSMUST00000086755  | Gm11216       |
| ENSMUST00000152678  | 42.22259089 - 0.831022750 - 0.396737548 - 2.09464105 - 0.0362029120 - 0.135539135907244     | ENSMUST00000152678  | ENSMUST00000152678  | Csd2c         |
| ENSMUST00000143554  | 1182.2695390 - 0.3801368360 - 0.181479140 - 2.0946585610 - 0.0362013550 - 0.135539135907244 | ENSMUST00000143554  | ENSMUST00000022895  | Ets2          |
| ENSMUST00000145997  | 921.1277465 - 0.54576493 - 0.260562753 - 2.09456235 - 0.0362099140 - 0.135557766953535      | ENSMUST00000145997  | ENSMUST000000145997 | Ppp5c         |
| ENSMUST00000126963  | 119.8995108 - 0.864540810 - 0.412770035 - 2.09448541 - 0.0362167610 - 0.135575812961945     | ENSMUST00000126963  | ENSMUST00000005338  | Cadm3         |
| ENSMUST00000173596  | 928.0623939 - 0.3546962590 - 0.169372899 - 2.0941736250 - 0.0362445160 - 0.135672123089726  | ENSMUST00000173596  | ENSMUST00000173596  | Dhx16         |
| ENSMUST00000103218  | 760.7741966 - 0.430150045 - 0.205390447 - 2.094084949 - 0.0362524130 - 0.13569409398472     | ENSMUST00000103218  | ENSMUST00000020696  | Rfl1          |
| ENSMUST00000128582  | 5225.120702 - 0.43514367 - 0.20779996 - 2.09405074 - 0.0362554660 - 0.135697906862109       | ENSMUST00000128582  | ENSMUST00000039768  | Dnajc11       |
| ENSMUST00000174152  | 1047.557897 - 0.490292400 - 0.234149803 - 2.09392619 - 0.0362665550 - 0.13573184403424      | ENSMUST00000174152  | ENSMUST00000021952  | Xp04          |
| ENSMUST00000137460  | 19.62071333 - 0.907393670 - 0.433350881 - 2.09390060 - 0.0362688350 - 0.13573278618111      | ENSMUST00000137460  | ENSMUST00000084885  | 3010001F23rik |
| ENSMUST00000042446  | 722.1114180 - 0.356964049 - 0.170481843 - 2.093853760 - 0.0362730090 - 0.135740814254363    | ENSMUST00000042446  | NA                  | NA            |
| ENSMUST00000133629  | 99.01862358 - 0.61723516 - 0.294791518 - 2.09380232 - 0.0362775930 - 0.13575037662294       | ENSMUST00000133629  | ENSMUST00000133629  | Sfmbt1        |
| ENSMUST00000174293  | 438.38040140 - 0.930803036 - 0.234180554 - 2.0937179740 - 0.0362851100 - 0.135770914841465  | ENSMUST00000174293  | ENSMUST00000071454  | Dtnb          |
| ENSMUST00000129303  | 1547.669142 - 0.368074986 - 0.175814169 - 2.093545632 - 0.0363004740 - 0.135820809505754    | ENSMUST00000129303  | ENSMUST00000026034  | Ckl1          |
| ENSMUST00000134527  | 686.6028157 - 0.38624797 - 0.184510674 - 2.09336382 - 0.0363166689 - 0.13587879158307       | ENSMUST00000134527  | ENSMUST00000085156  | Gm11974       |
| ENSMUST00000177421  | 788.7802770 - 0.52157978 - 0.249177191 - 2.0932011250 - 0.0363312040 - 0.13592085310465     | ENSMUST00000177421  | ENSMUST0000003587   | Gm20554       |
| ENSMUST00000126607  | 40.71145706 - 0.815955309 - 0.389837292 - 2.0930662870 - 0.0363432370 - 0.135950158972407   | ENSMUST00000126607  | ENSMUST00000089857  | Zfp882        |
| ENSMUST00000135201  | 2107.789668 - 0.32411282 - 0.154849350 - 2.09308484 - 0.0363415800 - 0.135950158972407      | ENSMUST00000135201  | ENSMUST00000006392  | Meo8          |
| ENSMUST00000177372  | 1286.464563 - 0.326842766 - 0.156156643 - 2.093042600 - 0.0363452030 - 0.135950158972407    | ENSMUST00000177372  | ENSMUST00000001998  | Ap4e1         |
| ENSMUST00000145694  | 1195.356718 - 0.421765400 - 0.201535578 - 2.09275902 - 0.0363706710 - 0.136037817244554     | ENSMUST00000145694  | ENSMUST0000027346   | Gcpd1         |
| ENSMUST00000045665  | 5749.385660 - 0.363600860 - 0.173746872 - 2.092704525 - 0.                                  |                     |                     |               |

|                     |                                                                                 |                     |                      |               |
|---------------------|---------------------------------------------------------------------------------|---------------------|----------------------|---------------|
| ENSMUST00000114457  | 8972.367106 0.443238185 0.212128066 2.089483928 0.036664183 0.136822280019076   | ENSMUST00000114457  | ENSMUSG000000035356  | Nfkbiz        |
| ENSMUST00000176847  | 280.3839286 0.627959576 0.300533415 2.089483377 0.036664232 0.136822280019076   | ENSMUST00000176847  | ENSMUSG00000073433   | Arhgdig       |
| ENSMUST00000074862  | 41.649914509 0.807788313 0.386609135 2.089418589 0.0366700509 0.136836392506219 | ENSMUST00000074862  | ENSMUSG00000065110   | Gm10101       |
| ENSMUST00000159766  | 3450.221520 0.546907876 0.261757139 2.089371382 0.036674305 0.136841008670174   | ENSMUST00000159766  | ENSMUSG00000015976   | Zmri2         |
| ENSMUST0000022197   | 5980.668562 0.316834316 0.151641848 2.089359365 0.036675386 0.136841008670174   | ENSMUST0000022197   | ENSMUSG00000021687   | Scamp1        |
| ENSMUST00000125967  | 64.42777544 0.846284041 0.405066159 2.089248932 0.036685320 0.1368444649871     | ENSMUST00000125967  | ENSMUSG00000012597   | C030037D09Rik |
| ENSMUST00000156931  | 7206.888239 0.371802140 0.177967675 2.089155457 0.036693731 0.136894192253007   | ENSMUST00000156931  | ENSMUSG00000026034   | Clk1          |
| ENSMUST00000152235  | 9020.110662 0.32659892 0.156336752 2.08907325 0.036701129 0.136914157471952     | ENSMUST00000152235  | ENSMUSG00000015223   | Uba1          |
| ENSMUST00000139907  | 1532.150882 0.355792613 0.170314230 2.089036315 0.036704454 0.136918929336675   | ENSMUST00000139907  | ENSMUSG00000039671   | Zmynd8        |
| ENSMUST0000006559   | 6405.124155 0.427958488 0.204688172 2.088945703 0.036712611 0.136943979449207   | ENSMUST0000006559   | ENSMUSG000000035274  | Tpbg          |
| ENSMUST00000164338  | 372.6670988 0.432486569 0.207036074 2.088943054 0.036712849 0.136943979449207   | ENSMUST00000164338  | ENSMUSG00000023952   | Gtbp2         |
| ENSMUST00000122806  | 16.49098389 0.948097818 0.453879011 2.088877862 0.036718719 0.136949238963825   | ENSMUST00000122806  | ENSMUSG0000000885760 | Gm14302       |
| ENSMUST00000063551  | 59.58927564 0.82622922 0.395564179 2.08873620 0.036731470 0.1369815491059       | ENSMUST00000063551  | ENSMUSG000000021719  | Rgs7bp        |
| ENSMUST00000170820  | 62.81660549 0.71760233 0.343556722 2.08874484 0.036730697 0.1369815491059       | ENSMUST00000170820  | ENSMUSG00000017082   | Rnf207        |
| ENSMUST00000130694  | 7344.606434 0.33141363 0.158671917 2.08867229 0.036737232 0.136995381470457     | ENSMUST00000130694  | ENSMUSG00000001924   | Uba1          |
| ENSMUST00000161327  | 8634.859692 0.487988957 0.233650079 2.088546081 0.036748603 0.137006600023927   | ENSMUST00000161327  | ENSMUSG0000000161327 | Rblcc1        |
| ENSMUST00000160245  | 1246.541865 0.46615119 0.223191490 2.08857065 0.036746389 0.137006600023927     | ENSMUST00000160245  | ENSMUSG000000160245  | Capin1        |
| ENSMUST00000166142  | 3682.616592 0.315270444 0.150953616 2.088525276 0.036750477 0.137006600023927   | ENSMUST00000166142  | ENSMUSG000000166142  | Kctd17        |
| ENSMUST00000112590  | 968.4951010 0.90811113 0.434793119 2.08860512 0.036743283 0.137006600023927     | ENSMUST00000112590  | ENSMUSG00000032561   | Acpp          |
| ENSMUST00000146133  | 499.2662829 0.947937469 0.453868753 2.08857176 0.036746287 0.137006600023927    | ENSMUST00000146133  | ENSMUSG000000028965  | Trlrsf9       |
| ENSMUST00000112937  | 1014.689760 0.44177700 0.21152971 2.088490061 0.036753651 0.137010797080304     | ENSMUST00000112937  | ENSMUSG00000032456   | Nmnat3        |
| ENSMUST00000177335  | 1458.913711 0.545558365 0.261225171 2.088460171 0.036756344 0.13701079586449    | ENSMUST00000177335  | ENSMUSG000000097939  | Pou6f1        |
| ENSMUST00000110136  | 1202.738119 0.42064051 0.201414252 2.08843472 0.036758637 0.13704121249066      | ENSMUST00000110136  | ENSMUSG000000027346  | Gpcpd1        |
| ENSMUST00000022518  | 1615.036742 0.36558691 0.175058151 2.08837411 0.036764100 0.137026851851465     | ENSMUST00000022518  | ENSMUSG000000021951  | Ngam2         |
| ENSMUST00000137484  | 206.9256161 0.539210196 0.258207804 2.088280008 0.036772583 0.137050835754766   | ENSMUST00000137484  | ENSMUSG00000031398   | Pknox3        |
| ENSMUST00000026551  | 23.60892934 0.94697146 0.453482570 2.08822020 0.036777975 0.13705566606786      | ENSMUST00000026551  | ENSMUSG000000025478  | Dpysl4        |
| ENSMUST00000122844  | 23.60892934 0.94697146 0.453482570 2.08822020 0.036777975 0.13705566606786      | ENSMUST00000122844  | ENSMUSG000000025478  | Dpysl4        |
| ENSMUST00000026595  | 2527.088764 0.39722537 0.190227661 2.08815781 0.036783601 0.13708899511264      | ENSMUST00000026595  | ENSMUSG00000025521   | Tmem192       |
| ENSMUST0000074556   | 2047.542491 0.74344799 0.356040622 2.08809879 0.036788923 0.137081196770368     | ENSMUST0000074556   | ENSMUSG000000074556  | H2afq1        |
| ENSMUST00000115337  | 283.3842735 0.58816177 0.281682325 2.08803223 0.036794927 0.137088298715786     | ENSMUST00000115337  | ENSMUSG00000022881   | Rfc4          |
| ENSMUST00000150025  | 8572.934884 0.293834402 0.140722450 2.088042102 0.036794036 0.137088298715786   | ENSMUST00000150025  | NA                   | NA            |
| ENSMUST00000152788  | 249.3660517 0.48897980 0.234188000 2.08797975 0.036799661 0.1370983033333       | ENSMUST00000152788  | ENSMUSG000000040648  | Ppip5k2       |
| ENSMUST00000066741  | 1297.467654 0.340109730 0.162891224 2.087956129 0.036801792 0.137098610149487   | ENSMUST00000066741  | ENSMUSG000000067481  | Pigo          |
| ENSMUST00000068836  | 38.7200659 0.786418161 0.376667568 2.087830830 0.036813097 0.137133091359815    | ENSMUST00000068836  | ENSMUSG00000055323   | Gm9967        |
| ENSMUST00000160706  | 24.75425516 0.91803005 0.439717890 2.08777052 0.036818539 0.13713940881075      | ENSMUST00000160706  | ENSMUSG000000160706  | Ap1s3         |
| ENSMUST00000148912  | 383.67644190 0.659810244 0.316033982 2.087782579 0.036817450 0.137138094881075  | ENSMUST00000148912  | ENSMUSG000000148912  | Ptp           |
| ENSMUST00000155129  | 808.3270773 0.53050889 0.254106252 2.08774437 0.036820890 0.137139252650696     | ENSMUST00000155129  | ENSMUSG000000028896  | Rcc1          |
| ENSMUST00000099357  | 4592.747719 0.54935758 0.263143041 2.08767666 0.036827011 0.13714675059806      | ENSMUST00000099357  | NA                   | NA            |
| ENSMUST00000059272  | 144.9997266 0.71156641 0.340839578 2.08768715 0.036826064 0.13714675059806      | ENSMUST00000059272  | ENSMUSG000000059272  | Hoxd9         |
| ENSMUST00000173391  | 400.8771022 0.38898128 0.186333156 2.08755806 0.036837717 0.137178987392352     | ENSMUST00000173391  | ENSMUSG000000042132  | Uggt2         |
| ENSMUST00000026828  | 337.2758728 0.67908000 0.325313537 2.08746308 0.036846294 0.13720328938598      | ENSMUST00000026828  | ENSMUSG000000026828  | Fam195a       |
| ENSMUST00000160539  | 22.52894950 0.893941604 0.428262168 2.087370003 0.036854701 0.137217497894933   | ENSMUST00000160539  | ENSMUSG00000038624   | Neprn         |
| ENSMUST00000040560  | 1650.579721 0.46839372 0.224396060 2.08735273 0.036856261 0.137217497894933     | ENSMUST00000040560  | ENSMUSG000000040560  | Tsfm          |
| ENSMUST00000126182  | 1146.070560 0.52370582 0.250890140 2.08739101 0.036852803 0.137217497894933     | ENSMUST00000126182  | ENSMUSG00000032568   | Pkig          |
| ENSMUST00000106344  | 3386.000363 0.335416480 0.160700757 2.087211567 0.036869014 0.13725734055313    | ENSMUST00000106344  | ENSMUSG000000106344  | Tnrc6c        |
| ENSMUST00000140294  | 188.8996519 0.527894805 0.252933924 2.087085815 0.036880377 0.137292007591513   | ENSMUST00000140294  | ENSMUSG000000005774  | Rfx5          |
| ENSMUST00000129287  | 334.8612438 0.518008133 0.248200357 2.087056375 0.036883040 0.137294201906135   | ENSMUST00000129287  | ENSMUSG000000129287  | Balap211      |
| ENSMUST00000128731  | 234.2014344 0.505681079 0.242316219 2.086864349 0.036900390 0.13731254453057    | ENSMUST00000128731  | ENSMUSG00000045639   | Zfp629        |
| ENSMUST00000149621  | 141.4901390 0.536210958 0.256970595 2.086662705 0.036918634 0.13741149108404    | ENSMUST00000149621  | ENSMUSG000000149621  | Rubcn         |
| ENSMUST00000144515  | 1148.289444 0.351309797 0.168368874 2.086548346 0.036928980 0.137440171780221   | ENSMUST00000144515  | ENSMUSG00000002205   | Vrk3          |
| ENSMUST00000147428  | 78.04420698 0.66756585 0.319940557 2.08653087 0.036930561 0.137440171780221     | ENSMUST00000147428  | ENSMUSG000000147428  | Cyp2r1        |
| ENSMUST00000065401  | 11.71887291 0.945722226 0.453255668 2.086509428 0.036932502 0.137440171780221   | ENSMUST00000065401  | ENSMUSG000000165401  | Gm5859        |
| ENSMUST00000086324  | 190.7596910 0.491524281 0.235596936 2.086293181 0.036952073 0.137505359833508   | ENSMUST00000086324  | NA                   | NA            |
| ENSMUST00000119946  | 2828.143871 0.35791598 0.171558492 2.08626212 0.036954885 0.137508175393514     | ENSMUST00000119946  | ENSMUSG00000057541   | Pus7          |
| ENSMUST00000032944  | 53.42010523 0.834438341 0.399977843 2.086211409 0.036959470 0.13751614260953    | ENSMUST00000032944  | ENSMUSG000000032944  | Gdgd3         |
| ENSMUST00000131219  | 98.69159653 0.56617696 0.271400919 2.08612765 0.036967061 0.13753818645323      | ENSMUST00000131219  | ENSMUSG00000006575   | Rundc3a       |
| ENSMUST00000170433  | 630.6703803 0.67532791 0.23742731 2.08600177 0.036978462 0.137572954781795      | ENSMUST00000170433  | NA                   | NA            |
| ENSMUST00000173168  | 3170.420239 0.46569707 0.223263649 2.08586158 0.036991162 0.137612553794836     | ENSMUST00000173168  | ENSMUSG00000031976   | Urb2          |
| ENSMUST000000882517 | 13.50648567 0.94624042 0.453654686 2.08581647 0.036995250 0.13762010911556      | ENSMUST000000882517 | ENSMUSG000000082517  | Snora23       |
| ENSMUST00000129220  | 704.899407 0.38558987 0.171923494 2.08575258 0.037001040 0.137633999630776      | ENSMUST00000129220  | ENSMUSG00000028619   | Tceanc2       |
| ENSMUST00000169589  | 2815.820085 0.35496370 0.170193481 2.08564806 0.037010513 0.137650295808721     | ENSMUST00000169589  | NA                   | NA            |
| ENSMUST00000131992  | 2815.820085 0.35496370 0.170193481 2.08564806 0.037010513 0.137650295808721     | ENSMUST00000131992  | ENSMUSG00000005751   | Pus7          |
| ENSMUST00000175689  | 857.7871235 0.62767323 0.300950496 2.08563616 0.037011592 0.137650295808721     | ENSMUST00000175689  | ENSMUSG0000000175689 | Gmnn          |
| ENSMUST00000135380  | 2900.256021 0.356332042 0.170854350 2.085589520 0.037015821 0.137658371691422   | ENSMUST00000135380  | ENSMUSG00000026034   | Clk1          |
| ENSMUST00000107964  | 607.9159159 0.72029755 0.345397075 2.08541879 0.037031302 0.13770828918383      | ENSMUST00000107964  | NA                   | NA            |
| ENSMUST00000140504  | 52.95156877 0.856383745 0.410680241 2.085281100 0.037043791 0.137740810545729   | ENSMUST00000140504  | ENSMUSG00000022802   | Lmln          |
| ENSMUST00000030901  | 4491.555125 0.32568745 0.156195131 2.08513193 0.037057326 0.137789752900544     | ENSMUST00000030901  | ENSMUSG00000029034   | Cpsf3l        |
| ENSMUST00000041460  | 34.67462817 0.90632573 0.434672237 2.08507848 0.037062176 0.137795801221801     | ENSMUST00000041460  | ENSMUSG00000034825   | Nrip3         |
| ENSMUST00000156717  | 569.9610313 0.57534054 0.275935510 2.08505437 0.037064365 0.137795801221801     | ENSMUST00000156717  | ENSMUSG000000156717  | Klc2          |
| ENSMUST00000146359  | 19.3494348 0.94550622 0.453470214 2.08504593 0.037065130 0.137795801221801      | ENSMUST00000146359  | ENSMUSG00000020182   | Ddc           |
| ENSMUST00000170994  | 2477.137062 0.28872225 0.138488530 2.084809871 0.037086562 0.137867811703289    | ENSMUST00000170994  | ENSMUSG0000000170994 | Trappc12      |
| ENSMUST00000026449  | 18.26022143 0.94612322 0.453844217 2.08468718 0.037097704 0.137893918484466     | ENSMUST00000026449  | ENSMUSG00000025383   | lt23a         |
| ENSMUST00000107098  | 9804.898543 0.30663345 0.147087100 2.08470663 0.037095937 0.137893918484466     | ENSMUST00000107098  | ENSMUSG00000018677   | S2c3a39       |
| ENSMUST00000132852  | 105.0029230 0.735509946 0.352819867 2.084661364 0.037100500 0.1378949760959     | ENSMUST00000132852  | ENSMUSG00000047996   | Prrg1         |
| ENSMUST00000125330  | 197.9984100 0.500263893 0.239978690 2.084617982 0.037103800 0.137901964608071   | ENSMUST00000125330  | ENSMUSG00000037348   | Paq7          |
| ENSMUST00000164184  | 1099.708882 0.34373520 0.164900289 2.08450336 0.037114404 0.13793006232573      | ENSMUST00000164184  | ENSMUSG000000164184  | Tmem110       |
| ENSMUST00000164894  | 50.74115240 0.90396380 0.433720793 2.08420674 0.037141365 0.1379190577136       | ENSMUST00000164894  | NA                   | NA            |
| ENSMUST00000168893  | 50.74115240 0.90396380 0.433720793 2.08420674 0.037141365 0.1379190577136       | ENSMUST00000168893  | NA                   | NA            |
| ENSMUST00000172080  | 50.74115240 0.90396380 0.433720793 2.08420674 0.037141365 0.1379190577136       | ENSMUST00000172080  | NA                   | NA            |
| ENSMUST00000148283  | 1138.010873 0.35160221 0.168685681 2.08436314 0.037127147 0.1379190577136       | ENSMUST00000148283  | ENSMUSG00000037916   | Ndufv1        |
| ENSMUST00000024702  | 415.9035633 0.72748462 0.349031770 2.08429343 0.037133484 0.1379190577136       | ENSMUST00000024702  | ENSMUSG00000023909   | Paqr4         |
| ENSMUST00000063156  | 80.46360693 0.81519086 0.391110255 2.08429938 0.037132943 0.1379190577136       | ENSMUST00000063156  | ENSMUSG00000020486   | sept-04       |
| ENSMUST00000153447  | 86.54695318 0.74796699 0.358852347 2.0843307 0.037130090 0.1379190577136        | ENSMUST             |                      |               |

|                    |                                                                                |                    |                       |               |
|--------------------|--------------------------------------------------------------------------------|--------------------|-----------------------|---------------|
| ENSMUST00000148453 | 435.6324721 -0.43869694 0.210689485 -2.08219667 0.037324508 0.138383371482796  | ENSMUST00000148453 | ENSMUSG00000004174853 | Ppp2r2d       |
| ENSMUST00000041588 | 2030.489395 0.382656637 0.183786083 2.082076238 0.037335506 0.13840078417077   | ENSMUST00000041588 | ENSMUST000000041588   | Brat1         |
| ENSMUST00000110807 | 2030.489395 0.382656637 0.183786083 2.082076238 0.037335506 0.13840078417077   | ENSMUST00000110807 | NA                    | NA            |
| ENSMUST00000046662 | 2030.489395 0.382656637 0.183786083 2.082076238 0.037335506 0.13840078417077   | ENSMUST00000046662 | NA                    | NA            |
| ENSMUST00000061656 | 5206.490802 0.365311745 0.175457327 2.082054651 0.037334780 0.13840078417077   | ENSMUST00000061656 | ENSMUSG000000505310   | Rictor        |
| ENSMUST00000137091 | 1896.915246 -0.42305924 0.203202967 -2.08195406 0.037346665 0.138427172128752  | ENSMUST00000137091 | ENSMUST000000372701   | Myef2         |
| ENSMUST00000176471 | 892.3806305 0.471272697 0.226370995 2.081859895 0.037355268 0.138451392007958  | ENSMUST00000176471 | NA                    | NA            |
| ENSMUST00000172735 | 415.3073462 0.501071129 0.240687491 2.081832864 0.037357738 0.138452877712118  | ENSMUST00000172735 | ENSMUSG00000071454    | Dtnb          |
| ENSMUST00000108169 | 767.6794489 0.423317504 0.203344172 2.081778394 0.037362716 0.138463655893069  | ENSMUST00000108169 | NA                    | NA            |
| ENSMUST00000031637 | 7052.560235 -0.35936611 0.172632199 -2.08168649 0.037371114 0.138471774805198  | ENSMUST00000031637 | ENSMUSG00000029632    | Ndufa4        |
| ENSMUST00000142459 | 187.3403696 -0.79025707 0.379615653 -2.08172942 0.037367190 0.138471774805198  | ENSMUST00000142459 | ENSMUSG00000027004    | Frzb          |
| ENSMUST00000028727 | 11.80505774 -0.93590052 0.449583566 -2.08170535 0.037369390 0.138471774805198  | ENSMUST00000028727 | ENSMUST00000028727    | Snap25        |
| ENSMUST00000111561 | 9289.832998 0.299242656 0.143758019 2.081571925 0.037381588 0.138479910665795  | ENSMUST00000111561 | ENSMUSG00000049550    | Clip1         |
| ENSMUST00000171264 | 1990.391243 -0.36083025 0.173344127 -2.08158340 0.037380538 0.138479910665795  | ENSMUST00000171264 | ENSMUST00000071264    | Snrpe         |
| ENSMUST00000152830 | 107.0515566 -0.83764241 0.402405930 -2.08158566 0.037380332 0.138479910665795  | ENSMUST00000152830 | ENSMUSG00000023927    | Satb1         |
| ENSMUST00000057465 | 10.85576824 -0.81879339 0.393351574 -2.08158159 0.037380703 0.138479910665795  | ENSMUST00000057465 | ENSMUST00000057465    | A530016L24Rik |
| ENSMUST00000149558 | 482.1791885 0.499145027 0.239800031 2.081505262 0.037386782 0.13849822376769   | ENSMUST00000149558 | ENSMUSG00000023571    | Fam132a       |
| ENSMUST00000155901 | 3285.337889 0.323114212 0.155234802 2.081454722 0.037392304 0.138497340539306  | ENSMUST00000155901 | ENSMUST00000155901    | Cnot6l        |
| ENSMUST00000161068 | 734.2781841 0.579415261 0.278370630 2.081452560 0.037392502 0.138497340539306  | ENSMUST00000161068 | ENSMUSG00000003721    | Insig2        |
| ENSMUST00000125990 | 41.4965246 -0.49180571 0.236288748 -2.08137592 0.037399510 0.138507967398873   | ENSMUST00000125990 | ENSMUST00000125990    | Prx           |
| ENSMUST0000006898  | 960.2719899 -0.62678856 0.301140215 -2.08138445 0.037398730 0.138507967398873  | ENSMUST0000006898  | ENSMUST0000006898     | Gmnn          |
| ENSMUST00000069536 | 1892.947118 0.469226972 0.225448427 2.081305147 0.037405984 0.13852475467924   | ENSMUST00000069536 | ENSMUSG00000069536    | Tcf7l1        |
| ENSMUST00000171423 | 23299.59875 -0.56304228 0.270526803 -2.08128096 0.037408196 0.138524800379415  | ENSMUST00000171423 | ENSMUST00000071423    | Anxa1         |
| ENSMUST00000142837 | 571.9941622 0.34405860 0.165316724 -2.08120869 0.037414808 0.138541619089969   | ENSMUST00000142837 | ENSMUSG00000038024    | Qsmx4c        |
| ENSMUST00000079896 | 2358.485758 -0.39596784 0.190274020 -2.08103998 0.037430246 0.13858623005941   | ENSMUST00000079896 | ENSMUSG00000025521    | Tmem192       |
| ENSMUST00000129094 | 920.0660680 0.327310872 0.157282984 2.081031675 0.037431066 0.13858623005941   | ENSMUST00000129094 | ENSMUSG00000024006    | Stk38         |
| ENSMUST00000151990 | 1055.891825 0.52571380 0.252631012 -2.08095515 0.037438010 0.13860452699563    | ENSMUST00000151990 | ENSMUSG00000023938    | Timm50        |
| ENSMUST00000128773 | 140.5624983 -0.5198586 0.274881069 -2.08084851 0.037447740 0.13861529986833    | ENSMUST00000128773 | ENSMUSG00000031105    | Slc25a14      |
| ENSMUST00000149547 | 102.3513627 -0.92004325 0.442138768 -2.08089252 0.037443744 0.13861529986833   | ENSMUST00000149547 | ENSMUSG00000028524    | Gsjp1         |
| ENSMUST00000060955 | 1208.489105 -0.42117339 0.202387781 -2.08084399 0.037448188 0.13861529986833   | ENSMUST00000060955 | ENSMUSG00000027346    | Gcpd1         |
| ENSMUST00000110142 | 1208.489105 -0.42117339 0.202387781 -2.08084399 0.037448188 0.13861529986833   | ENSMUST00000110142 | ENSMUST00000110142    | Gcpd1         |
| ENSMUST00000095020 | 6512.884175 0.280149526 0.134636749 2.080780521 0.037453999 0.138625374096162  | ENSMUST00000095020 | ENSMUSG00000070942    | Il1rl2        |
| ENSMUST0000026324  | 7973.974589 -0.35491859 0.170579640 -2.08066210 0.037464845 0.1386578459133    | ENSMUST0000026324  | ENSMUST0000026324     | Acto9         |
| ENSMUST00000131820 | 2543.948476 -0.52154754 0.250703160 -2.08044662 0.037484586 0.138723234967834  | ENSMUST00000131820 | ENSMUSG00000034868    | Myf12b        |
| ENSMUST00000143427 | 1764.943181 -0.36755017 0.176673120 -2.08039667 0.037489130 0.138732502971278  | ENSMUST00000143427 | ENSMUST00000019129    | Trmt1         |
| ENSMUST00000084319 | 3198.075597 -0.31315956 0.150531389 -2.08036056 0.037492473 0.13873708758541   | ENSMUST00000084319 | ENSMUSG00000006392    | Med8          |
| ENSMUST00000170956 | 1216.257003 0.316108158 0.151972727 2.080032139 0.037522585 0.138840826558028  | ENSMUST00000170956 | ENSMUST00000170956    | Cyp4f16       |
| ENSMUST00000152638 | 406.6090343 -0.39472776 0.189787068 -2.07984541 0.037539714 0.13896527488335   | ENSMUST00000152638 | ENSMUSG00000033827    | Fam206a       |
| ENSMUST00000134495 | 1413.073683 -0.29905346 0.143797207 -2.07968895 0.037554072 0.138941969233914  | ENSMUST00000134495 | ENSMUST00000134495    | Chuk          |
| ENSMUST00000160407 | 2392.485599 -0.34161424 0.164264047 -2.07966532 0.037556240 0.138942309334294  | ENSMUST00000160407 | ENSMUSG00000022635    | Zcrrb1        |
| ENSMUST00000116412 | 4489.233418 -0.44411921 0.213557981 -2.07961889 0.037560502 0.138949172809023  | ENSMUST00000116412 | ENSMUST00000116412    | Ctcb2         |
| ENSMUST00000136463 | 217.0038955 -0.64524677 0.310274480 -2.07959987 0.037562248 0.138949172809023  | ENSMUST00000136463 | ENSMUSG00000020532    | Acaca         |
| ENSMUST00000163836 | 433.6450639 -0.60877183 0.292740602 -2.07956065 0.037565849 0.13895481187279   | ENSMUST00000163836 | ENSMUST00000163836    | C330006A16Rik |
| ENSMUST00000071782 | 57.09250626 -0.89361080 0.429718889 -2.07952414 0.037569201 0.138959529175637  | ENSMUST00000071782 | ENSMUSG00000059991    | Nptx2         |
| ENSMUST00000091694 | 516.7929753 0.656010886 0.315508515 2.079217687 0.037597346 0.13905946802081   | ENSMUST00000091694 | ENSMUST00000091694    | Fam65b        |
| ENSMUST00000156120 | 9254.823035 -0.37660372 0.181138091 -2.07909732 0.037608405 0.139089161380395  | ENSMUST00000156120 | ENSMUSG00000028961    | Pgd           |
| ENSMUST00000038757 | 49.01468193 -0.83540950 0.401863016 -2.07884146 0.037631924 0.139168405367524  | ENSMUST00000038757 | ENSMUST00000038757    | Csd2          |
| ENSMUST00000134539 | 1336.513515 -0.59581295 0.286612186 -2.07881235 0.037634600 0.139168949361267  | ENSMUST00000134539 | ENSMUSG00000025790    | Slo3a1        |
| ENSMUST00000052120 | 5662.896460 -0.38677880 0.186059157 -2.07879476 0.037636218 0.139168949361267  | ENSMUST00000052120 | ENSMUST00000052120    | Wdr3          |
| ENSMUST00000160210 | 1646.912352 0.445650990 0.214382364 2.078767025 0.037638769 0.13917068982665   | ENSMUST00000160210 | ENSMUSG00000026335    | Pam           |
| ENSMUST00000171688 | 2520.815684 0.662796418 0.318856280 2.078668224 0.037647855 0.13919275748141   | ENSMUST00000171688 | ENSMUST00000171688    | Ang           |
| ENSMUST00000116584 | 3848.141250 -0.31643096 0.152228564 -2.07865699 0.037648880 0.13919275748141   | ENSMUST00000116584 | ENSMUSG00000022889    | Mrp139        |
| ENSMUST00000108083 | 272.0470345 -0.60740702 0.292229264 -2.07852909 0.037660540 0.139220484084816  | ENSMUST00000108083 | NA                    | NA            |
| ENSMUST00000174075 | 961.8126756 -0.43740358 0.210441183 -2.07850752 0.037662638 0.139220484084816  | ENSMUST00000174075 | ENSMUSG00000024369    | Nelfe         |
| ENSMUST00000139876 | 424.0946278 0.933246863 0.448989407 2.078549845 0.037658744 0.139220484084816  | ENSMUST00000139876 | ENSMUST00000139876    | Bend5         |
| ENSMUST00000174414 | 462.6422651 0.488468161 0.235022951 2.078384937 0.037673918 0.139254491188173  | ENSMUST00000174414 | ENSMUSG00000071454    | Dtnb          |
| ENSMUST00000122961 | 1333.475314 0.381807121 0.183714422 2.078264280 0.037685024 0.139287846814221  | ENSMUST00000122961 | ENSMUST00000122961    | Ccdc109b      |
| ENSMUST00000066692 | 978.0876538 -0.40856317 0.196597601 -2.07816965 0.037693736 0.13932351546719   | ENSMUST00000066692 | ENSMUSG00000006592    | Mvd           |
| ENSMUST00000110501 | 2638.938914 -0.44877534 0.215955803 -2.07808883 0.037701178 0.13933216005264   | ENSMUST00000110501 | ENSMUST00000110501    | Myef2         |
| ENSMUST00000169350 | 70.02749636 0.813036441 0.391256434 2.078014238 0.037708047 0.139342157933681  | ENSMUST00000169350 | ENSMUSG00000029797    | Sspo          |
| ENSMUST00000939993 | 861.2792716 -0.38405817 0.184817803 -2.07803667 0.037705981 0.139342157933681  | ENSMUST00000939993 | ENSMUST00000939993    | Pwmp2b        |
| ENSMUST00000036153 | 5806.804043 -0.27501816 0.132368991 -2.07766307 0.0377440402 0.139446064383983 | ENSMUST00000036153 | ENSMUSG00000034432    | Cops8         |
| ENSMUST00000129178 | 199715.0090 0.502746161 0.241974594 2.077681592 0.037738695 0.139446064383983  | ENSMUST00000129178 | ENSMUST00000129178    | Hsp90b1       |
| ENSMUST00000106281 | 23.91376856 -0.89622797 0.431368019 -2.07764120 0.037742417 0.139446064383983  | ENSMUST00000106281 | ENSMUSG00000066411    | Zfp69         |
| ENSMUST00000164833 | 4569.742060 -0.38492371 0.185275124 -2.07757906 0.037748146 0.139454794424896  | ENSMUST00000164833 | ENSMUST00000164833    | Hnrnpd        |
| ENSMUST00000000264 | 27123.35644 0.585823613 0.281976002 2.077554990 0.037749396 0.139454794424896  | ENSMUST00000000264 | NA                    | NA            |
| ENSMUST00000185444 | 86.51528204 -0.78446571 0.377600365 -2.07750254 0.037755200 0.139454794424896  | ENSMUST00000185444 | ENSMUSG00000020486    | sept-04       |
| ENSMUST00000134923 | 86.51528204 -0.78446571 0.377600365 -2.07750254 0.037755200 0.139454794424896  | ENSMUST00000134923 | ENSMUST00000134923    | sept-04       |
| ENSMUST00000124107 | 211.2429117 -0.54827177 0.263908608 -2.07750620 0.037754863 0.139454794424896  | ENSMUST00000124107 | ENSMUST00000124107    | Gcpd1         |
| ENSMUST00000177053 | 882.9681844 0.412265760 0.198447030 2.077459960 0.037759127 0.139461599570846  | ENSMUST00000177053 | ENSMUST00000177053    | Evil5         |
| ENSMUST00000135944 | 99.30073020 -0.69090049 0.332595049 -2.07730238 0.037773659 0.139505733270090  | ENSMUST00000135944 | ENSMUST00000135944    | Pdlim2        |
| ENSMUST00000145361 | 1045.810606 -0.46006337 0.221475726 -2.07726320 0.037777230 0.139513221815466  | ENSMUST00000145361 | ENSMUST00000145361    | Lpar1         |
| ENSMUST00000132397 | 1827.061471 0.290719446 0.139958227 2.077187256 0.037784279 0.13951339579906   | ENSMUST00000132397 | ENSMUSG00000023996    | Gm20517       |
| ENSMUST00000223335 | 2346.608386 -0.36209173 0.174321924 -2.07714400 0.037788270 0.139538432579273  | ENSMUST00000223335 | ENSMUST00000223335    | Pvr13         |
| ENSMUST00000134062 | 6321.597679 -0.39665106 0.190680568 -2.07709189 0.037793078 0.139544458327478  | ENSMUST00000134062 | ENSMUSG00000040990    | Sh3kbp1       |
| ENSMUST00000149579 | 2230.368745 0.309162512 0.148844746 2.077081120 0.037794072 0.139544458327478  | ENSMUST00000149579 | ENSMUST00000149579    | Arip4b        |
| ENSMUST00000127856 | 1271.626260 0.324119390 0.156050275 2.077019018 0.037798003 0.139557918919583  | ENSMUST00000127856 | ENSMUSG00000022760    | Thap7         |
| ENSMUST00000143104 | 1782.862769 0.352944520 0.169937192 2.076911570 0.037800721 0.13958683238579   | ENSMUST00000143104 | ENSMUST00000143104    | Alg2          |
| ENSMUST00000131497 | 615.3887172 0.391856190 0.189316662 2.076867479 0.037813791 0.139594159564484  | ENSMUST00000131497 | ENSMUSG00000020886    | Dlg4          |
| ENSMUST00000170437 | 4505.426943 0.412593075 0.198687499 2.076593021 0.037839137 0.139625104503433  | ENSMUST00000170437 | NA                    | NA            |
| ENSMUST00000026297 | 5914.476905 -0.27444295 0.132158509 -2.07661965 0.037836670 0.139626104503433  | ENSMUST00000026297 | ENSMUSG00000025266    | Gnl3l         |
| ENSMUST00000112691 | 5914.476905 -0.27444295 0.132158509 -2.07661965 0.037836670 0.139626104503433  | ENSMUST00000112691 | ENSMUST00000112691    | Gnl3l         |
| ENSMUST00000147053 | 46.62736922 -0.91195877 0.439160664 -2.076                                     |                    |                       |               |

|                     |                                                                                  |                     |                      |               |
|---------------------|----------------------------------------------------------------------------------|---------------------|----------------------|---------------|
| ENSMUST00000004587  | 231.0811995-0.847093654-0.4083901302-0.074226559-0.0380582740-140187352179359    | ENSMUST000000004587 | ENSMUSG000000004473  | Clec11a       |
| ENSMUST00000112105  | 3567.143668-0.439282165-0.2117965382-0.0740762270-0.0380722310-140231044602643   | ENSMUST00000112105  | ENSMUSG000000035299  | Mid1          |
| ENSMUST00000143259  | 70.18021173-0.940791250-0.453614765-2.07398728-0.0380804991-140253747726815      | ENSMUST00000143259  | NA                   | NA            |
| ENSMUST00000128167  | 541.1213700-0.48402161-0.233392393-2.07385341-0.0380929270-140291826655402       | ENSMUST00000128167  | ENSMUSG00000030400   | Erc2          |
| ENSMUST00000174843  | 1606.843063-0.422607782-0.203814313-2.0734941330-0.0381263160-140408865009814    | ENSMUST00000174843  | ENSMUSG00000025880   | Smad7         |
| ENSMUST00000148390  | 500.2572104-0.81844383-0.394718062-2.07348968-0.0381267300-140408865009814       | ENSMUST00000148390  | ENSMUSG00000038267   | Slc22a23      |
| ENSMUST00000128022  | 1860.124634-0.38654632-0.186425105-2.07346710-0.0381288290-140404870824586       | ENSMUST00000128022  | ENSMUSG00000001909   | Trmt1         |
| ENSMUST00000053561  | 1149.854415-0.339605937-0.163791331-2.0734060510-0.0381345060-1404014046760373   | ENSMUST00000053561  | NA                   | NA            |
| ENSMUST00000025961  | 6510.115493-0.33286377-0.160546460-2.07331742-0.038142740-140431725985982        | ENSMUST00000025961  | ENSMUSG00000024997   | Prdx3         |
| ENSMUST00000136608  | 91.75982259-0.62561294-0.301746075-2.07330928-0.0381435040-140431725985982       | ENSMUST00000136608  | ENSMUSG00000058006   | Midn1         |
| ENSMUST00000127666  | 2157.459344-0.31500739-0.151939594-2.07324100-0.0381498550-140447380683527       | ENSMUST00000127666  | ENSMUSG00000053768   | Chchd3        |
| ENSMUST00000177084  | 1939.840158-0.38414702-0.185296296-2.07315002-0.0381583190-1404070813588629      | ENSMUST00000177084  | ENSMUSG00000001909   | Trmt1         |
| ENSMUST00000122384  | 948.983894-0.37766927-0.182178846-2.07306874-0.0381658810-1404090922854194       | ENSMUST00000122384  | ENSMUSG00000032470   | Mras          |
| ENSMUST00000085463  | 178.8061676-0.786374269-0.379336893-2.0730234310-0.0381700980-140498717340699    | ENSMUST00000085463  | NA                   | NA            |
| ENSMUST00000107923  | 11879.21038-0.285496770-0.137724492-2.07295569-0.0381764020-140514192045309      | ENSMUST00000107923  | ENSMUSG00000020483   | Dynl12        |
| ENSMUST00000174555  | 1090.195816-0.52185561-0.251752455-2.07289186-0.0381823440-140520602383394       | ENSMUST00000174555  | ENSMUSG00000032058   | Ppp2r1b       |
| ENSMUST00000062904  | 5630.382633-0.41797019-0.201635298-2.07290190-0.0381814090-140520602383394       | ENSMUST00000062904  | ENSMUSG00000039768   | Dnajc11       |
| ENSMUST00000139359  | 36.37319120-0.82468385-0.397846772-2.07286802-0.0381845630-140521041325834       | ENSMUST00000139359  | ENSMUSG000000042515  | Mum1l1        |
| ENSMUST00000072767  | 13785.265260-0.251502425-0.121340207-2.0727047590-0.0381997640-140554312120353   | ENSMUST00000072767  | ENSMUSG00000059495   | Arhgef12      |
| ENSMUST00000141821  | 104.7992355-0.593001367-0.286103580-2.072680691-0.0382020050-140554312120353     | ENSMUST00000141821  | ENSMUSG000000041821  | Cln6          |
| ENSMUST00000026169  | 438.3221583-0.344945893-0.166420691-2.0727344130-0.0381970030-140554312120353    | ENSMUST00000026169  | ENSMUSG00000026169   | Ogdfod        |
| ENSMUST00000008499  | 12450.42445-0.246104773-0.118736986-2.072688391-0.0382012880-140554312120353     | ENSMUST00000008499  | ENSMUSG000000066324  | Impad1        |
| ENSMUST00000173192  | 943.9630171-0.52903576-0.25523587-2.07258895-0.0382105490-14057801768596         | ENSMUST00000173192  | ENSMUSG000000101878  | Gm2b3         |
| ENSMUST000000053744 | 692.4122092-0.530855410-0.256134857-2.07256214-0.0382130470-140578477080958      | ENSMUST000000053744 | ENSMUSG0000000946791 | 2410016006Rik |
| ENSMUST00000172035  | 4374.375994-0.482563770-0.232839119-2.07252020-0.0382169540-140586121595364      | ENSMUST00000172035  | ENSMUSG00000037275   | Gemin5        |
| ENSMUST00000138300  | 946.5552893-0.429505930-0.207252880-2.07237620-0.0382303710-140627746655719      | ENSMUST00000138300  | ENSMUSG00000001909   | Trmt1         |
| ENSMUST00000151548  | 2602.192949-0.25946100-0.125203666-2.07231152-0.0382363970-140642185476263       | ENSMUST00000151548  | ENSMUSG000000015648  | Ptds11        |
| ENSMUST00000125456  | 218.8562230-0.75185882-0.36283396-2.07218748-0.0382479600-140661518591851        | ENSMUST00000125456  | ENSMUSG00000001517   | Foxm1         |
| ENSMUST00000128673  | 8.542530060-0.92754256-0.447612899-2.07219802-0.0382469770-140661518591851       | ENSMUST00000128673  | ENSMUSG000000015222  | Map2          |
| ENSMUST00000102841  | 95733.44135-0.33149131-0.159970678-2.072200470-0.0382467490-140661518591851      | ENSMUST00000102841  | ENSMUSG00000020458   | Rtn4          |
| ENSMUST00000144060  | 4948.665904-0.28113663-0.135691156-2.07188622-0.0382760520-140579709605206       | ENSMUST00000144060  | ENSMUSG000000021711  | Trappc13      |
| ENSMUST00000159312  | 51.58482316-0.88834140-0.428719639-2.07183840-0.0382805140-14075803241408        | ENSMUST00000159312  | ENSMUSG00000054702   | Ap1s3         |
| ENSMUST00000149174  | 1035.740250-0.59695119-0.288124240-2.07185341-0.0382791130-14075803241408        | ENSMUST00000149174  | ENSMUSG000000034349  | Smc4          |
| ENSMUST00000000939  | 538.6335810-0.56299448-0.271750132-2.071735840-0.0382900802-140785482072814      | ENSMUST00000000939  | ENSMUSG000000009015  | Hip1r         |
| ENSMUST00000106384  | 3039.885861-0.321562920-0.155218207-2.07168303-0.0382950010-140795863573982      | ENSMUST00000106384  | ENSMUSG00000006384   | Med8          |
| ENSMUST000000031411 | 13562.94923-0.33420743-0.161324245-2.07165039-0.0382980560-14079932694792        | ENSMUST000000031411 | ENSMUSG00000029455   | Alhd2         |
| ENSMUST00000143111  | 1161.534502-0.416382370-0.200996117-2.07159409-0.0383033110-14081908567004       | ENSMUST00000143111  | ENSMUSG000000028322  | Exoc3         |
| ENSMUST00000156743  | 173.7842619-0.58374535-0.281789113-2.07156816-0.0383057310-140812070716455       | ENSMUST00000156743  | ENSMUSG00000001864   | Aif1l         |
| ENSMUST00000030882  | 6659.755748-0.25783035-0.124470415-2.07141880-0.0383196740-140855588603282       | ENSMUST00000030882  | ENSMUSG000000029017  | Pmpcb         |
| ENSMUST00000171732  | 83.11766537-0.60468269-0.291937157-2.07127691-0.0383329240-140896554406299       | ENSMUST00000171732  | NA                   | NA            |
| ENSMUST00000131395  | 1171.130090-0.38019961-0.183562968-2.07122173-0.0383380780-140907758784996       | ENSMUST00000131395  | ENSMUSG000000041133  | Smc1a         |
| ENSMUST00000144359  | 1547.4872580-0.3537022530-0.170774981-2.0711596650-0.0383438770-140913592050253  | ENSMUST00000144359  | ENSMUSG00000028764   | Sfi1          |
| ENSMUST00000116257  | 4644.9643610-0.940217767-0.453952480-2.0711810310-0.0383418810-140913592050253   | ENSMUST00000116257  | ENSMUSG000000023965  | Tnfrsf9       |
| ENSMUST00000056962  | 99.00953832-0.686272650-0.331363620-2.07105612-0.0383535510-140941402433646      | ENSMUST00000056962  | ENSMUSG000000041617  | Cdc474a       |
| ENSMUST00000163540  | 792.4572795-0.494191480-0.238637973-2.07088366-0.0383666990-14097898457112       | ENSMUST00000163540  | NA                   | NA            |
| ENSMUST0000016086   | 935.11637830-0.4452554680-0.215007841-2.0708801380-0.0383699980-14097898457112   | ENSMUST0000016086   | ENSMUSG000000015942  | Gtf2ird2      |
| ENSMUST0000030808   | 4641.5174490-0.9400837530-0.453953959-2.0708790710-0.0383700880-14097898457112   | ENSMUST0000030808   | ENSMUSG000000030808  | Tnfrsf9       |
| ENSMUST0000068563   | 1264.107609-0.286459967-0.138331196-2.0708269330-0.0383749720-140983430370312    | ENSMUST0000068563   | ENSMUSG00000028454   | Acox3         |
| ENSMUST000001066374 | 1855.458126-0.382276240-0.184602436-2.07080825-0.0383767180-140983430370312      | ENSMUST000001066374 | NA                   | NA            |
| ENSMUST00000135462  | 160.0362588-0.5998037480-0.289651683-2.0707759820-0.0383797350-140983430370312   | ENSMUST00000135462  | ENSMUSG00000020882   | NA            |
| ENSMUST00000155666  | 2181.531935-0.27192856-0.13316693-2.07078442-0.0383789460-140983430370312        | ENSMUST00000155666  | ENSMUSG00000039230   | Cacnb1        |
| ENSMUST00000175784  | 1555.715863-0.39155388-0.189117050-2.07043142-0.0384119610-141094064618227       | ENSMUST00000175784  | ENSMUSG000000015784  | Tbcd          |
| ENSMUST00000144733  | 2116.690410-0.37486864-0.181078094-2.07020425-0.0384332210-141164404848354       | ENSMUST00000144733  | ENSMUSG000000014733  | Trmt1         |
| ENSMUST00000165809  | 50.35060410-0.89674972-0.433186462-2.07012407-0.0384407270-141176476561974       | ENSMUST00000165809  | ENSMUSG000000028937  | Acot7         |
| ENSMUST00000150855  | 45.35538583-0.780695201-0.37712223-0.0701384160-0.0384393840-141176476561974     | ENSMUST00000150855  | NA                   | NA            |
| ENSMUST00000132669  | 523.58537990-0.3727532480-0.180089462-2.0698226440-0.0384689560-141273296039248  | ENSMUST00000132669  | ENSMUSG00000055897   | Iglsf9        |
| ENSMUST00000089497  | 3285.157700-0.392037090-0.189410604-2.06977371-0.0384735400-141273724487736      | ENSMUST00000089497  | ENSMUSG000000089497  | Ppp4r11-ps    |
| ENSMUST00000173266  | 349.3084793-0.462091970-0.223256411-2.06978144-0.0384728150-141273724487736      | ENSMUST00000173266  | ENSMUSG000000041354  | Isgy1         |
| ENSMUST00000098109  | 1343.3396680-0.3315699280-0.1602154602-0.0695251720-0.0384968310-141351494183863 | ENSMUST00000098109  | ENSMUSG000000098109  | Rgl2          |
| ENSMUST00000125807  | 438.10257730-0.909417104-0.4394556192-0.0694173980-0.0385069350-141380834516222  | ENSMUST00000125807  | ENSMUSG000000045667  | Pigo          |
| ENSMUST00000150652  | 355.9230280-0.768959470-0.175398423-2.06932922-0.0385152030-141403433161038      | ENSMUST00000150652  | ENSMUSG00000021377   | Smtln2        |
| ENSMUST0000066882   | 7419.330941-0.50787667-0.245440798-2.06924307-0.0385232820-141425334473246       | ENSMUST0000066882   | ENSMUSG00000027805   | Dek           |
| ENSMUST00000143991  | 1353.739201-0.319631100-0.154474989-2.06914470-0.0385325090-141443690172544      | ENSMUST00000143991  | ENSMUSG000000018171  | Vpml          |
| ENSMUST00000135741  | 3486.086321-0.381548889-0.184398278-2.0691564630-0.0385340660-141443690172544    | ENSMUST00000135741  | ENSMUSG00000022683   | Dab2ip        |
| ENSMUST00000143617  | 1379.598027-0.37294924-0.180245752-2.06911529-0.0385352680-14144605905206        | ENSMUST00000143617  | ENSMUSG0000000143617 | Nubp1         |
| ENSMUST00000134577  | 235.5477651-0.45587675-0.220331884-2.06904577-0.0385417910-141462243061126       | ENSMUST00000134577  | ENSMUSG000000029780  | Nt5c3         |
| ENSMUST00000150322  | 2141.168873-0.35397743-0.171087441-2.06898548-0.0385474480-141475246551166       | ENSMUST00000150322  | ENSMUSG000000034714  | NAgk          |
| ENSMUST00000148381  | 1178.338276-0.306576130-0.148181443-2.06892396-0.0385532220-141488675673954      | ENSMUST00000148381  | ENSMUSG00000002635   | Pdcd2l        |
| ENSMUST00000124811  | 154.9532653-0.68323530-0.330244669-2.0688707310-0.0385582180-141499253247296     | ENSMUST00000124811  | ENSMUSG0000000214811 | 2210408F21Rik |
| ENSMUST00000172574  | 24.06063090-0.89625461-0.433225062-2.06879677-0.0385651610-141516998881163       | ENSMUST00000172574  | ENSMUSG000000020185  | E2f7          |
| ENSMUST00000156529  | 3566.623136-0.2921136100-0.141206474-2.0686984130-0.0385743960-1415430959639     | ENSMUST00000156529  | ENSMUSG0000000156529 | Pgap2         |
| ENSMUST00000119344  | 7094.266715-0.509644470-0.246373443-2.06858527-0.0385850220-1415743717182507     | ENSMUST00000119344  | ENSMUSG00000027805   | Pfn2          |
| ENSMUST00000133097  | 398.3191829-0.410709751-0.198553774-2.0685063880-0.0385925400-141586420933378    | ENSMUST00000133097  | ENSMUSG000000033097  | Fam13         |
| ENSMUST00000141451  | 123.28164710-0.639439500-0.3091312162-0.0685051070-0.0385925500-141586420933378  | ENSMUST00000141451  | ENSMUSG00000028766   | Alpl          |
| ENSMUST00000132778  | 1246.280109-0.342176905-0.165430455-2.0684030940-0.0386021340-141613816947039    | ENSMUST00000132778  | ENSMUSG00000007854   | AU022252      |
| ENSMUST00000146120  | 265.2346020-0.72849234-0.352204587-2.06837835-0.0386044570-14161457660043        | ENSMUST00000146120  | ENSMUSG000000042603  | Hirp3         |
| ENSMUST00000146276  | 276.0023408-0.426204497-0.206663061-2.0683207030-0.0386098760-141626869458922    | ENSMUST00000146276  | ENSMUSG000000028439  | Fam219a       |
| ENSMUST00000153741  | 1391.1488040-0.347730216-0.168125760-2.0682744640-0.0386142210-14163355819821    | ENSMUST00000153741  | ENSMUSG00000022957   | Itsm1         |
| ENSMUST00000110602  | 721.3363832-0.54602392-0.264002131-2.06825573-0.0386159810-14163355819821        | ENSMUST00000110602  | ENSMUSG00000027242   | Wdr76         |
| ENSMUST00000078572  | 1440.083286-0.3292366130-0.159190975-2.0681864160-0.0386224970-141646906965064   | ENSMUST00000078572  | ENSMUSG000000078572  | Yip2f         |
| ENSMUST00000130265  | 337.1831536-0.392656566-0.189871155-2.0680637650-0.0386340270-141684213520403    | ENSMUST00000130265  | ENSMUSG00000057133   | Chd6          |
| ENSMUST0000020238   | 236595.30750-0.501344760-0.242439679-2.0679154580-0.0386479730-14172591826373    | ENSMUST0000020238   | ENSMUSG00000020048   | Hsp90b1       |
| ENSMUST00000148767  | 360.3157104-0.56301426-0.272270366-2.06784996-0.                                 |                     |                      |               |

|                     |                                                                                             |                     |                      |               |
|---------------------|---------------------------------------------------------------------------------------------|---------------------|----------------------|---------------|
| ENSMUST00000139414  | 2154.260327 - 0.27318341 - 0.132319827 - 2.06456898 - 0.0389638000 - 0.142596642748218      | ENSMUST00000139414  | ENSMUSG000000039230  | Tbcd          |
| ENSMUST00000148297  | 310.6213359 - 0.48224697 - 0.233598649 - 2.06442536 - 0.0389774003 - 0.142638625419493      | ENSMUST00000148297  | ENSMUSG000000040479  | Dgkz          |
| ENSMUST00000119394  | 1184.961399 - 0.302922970 - 0.146755998 - 2.06412673 - 0.039005701 - 0.14273437432606       | ENSMUST00000119394  | ENSMUSG000000028608  | 0610037L13Rik |
| ENSMUST00000159946  | 1600.373666 - 0.33148309 - 0.160594536 - 2.06409942 - 0.0390082900 - 0.142736044314005      | ENSMUST00000159946  | ENSMUSG000000015946  | Tra2b         |
| ENSMUST00000139295  | 27300.44594 - 0.30862317 - 0.149524657 - 2.06402861 - 0.039015003 - 0.14275820512446        | ENSMUST00000139295  | ENSMUSG000000025393  | Atp5b         |
| ENSMUST00000128537  | 1428.602935 - 0.39708604 - 0.192387671 - 2.06398901 - 0.0390187570 - 0.142758732604843      | ENSMUST00000128537  | ENSMUSG000000014909  | Trmt1         |
| ENSMUST00000152416  | 16.91158927 - 0.93261561 - 0.451874145 - 2.06388355 - 0.0390287580 - 0.142787514990135      | ENSMUST00000152416  | ENSMUSG000000014773  | Dll1          |
| ENSMUST00000138496  | 5465.315033 - 0.451306973 - 0.2186780192 - 0.063796690 - 0.0390369960 - 0.142809847344942   | ENSMUST00000138496  | NA                   | NA            |
| ENSMUST00000139586  | 2153.564301 - 0.326434220 - 0.158180217 - 2.06368553 - 0.0390475420 - 0.142834074506386     | ENSMUST00000139586  | ENSMUSG000000015804  | Med28         |
| ENSMUST00000176806  | 280.4947279 - 0.530927227 - 0.257178362 - 0.063681886 - 0.0390478870 - 0.142834074506386    | ENSMUST00000176806  | ENSMUSG000000029647  | Par3          |
| ENSMUST00000127980  | 128.2168751 - 0.565289215 - 0.273932997 - 2.0636039470 - 0.0390552830 - 0.14284550896935    | ENSMUST00000127980  | ENSMUSG000000042810  | Krba1         |
| ENSMUST00000142192  | 1769.011101 - 0.34104035 - 0.165264084 - 2.06360839 - 0.039054861 - 0.14284550896935        | ENSMUST00000142192  | ENSMUSG000000035274  | Sgpl1         |
| ENSMUST00000122641  | 187.5613539 - 0.554581822 - 0.268754997 - 2.063521898 - 0.0390630690 - 0.142866179057481    | ENSMUST00000122641  | ENSMUSG000000084590  | Mir1896       |
| ENSMUST00000148651  | 15.66808483 - 0.90043791 - 0.436392176 - 2.06336861 - 0.0390776190 - 0.142911582795984      | ENSMUST00000148651  | ENSMUSG000000084885  | 3010001F23Rik |
| ENSMUST00000171640  | 6016.329076 - 0.37627162 - 0.182364694 - 2.06329204 - 0.0390848890 - 0.142930358982331      | ENSMUST00000171640  | ENSMUSG000000005058  | Hnrnpd        |
| ENSMUST00000098500  | 6268.117382 - 0.425505936 - 0.206245766 - 2.0631014330 - 0.0391029920 - 0.142983418789811   | ENSMUST00000098500  | ENSMUSG000000035274  | Tpbg          |
| ENSMUST00000139069  | 4861.229031 - 0.43310383 - 0.209929252 - 2.06309427 - 0.0391036720 - 0.142983418789811      | ENSMUST00000139069  | ENSMUSG000000039768  | Dnajc11       |
| ENSMUST00000162903  | 4287.6081990 - 0.336763884 - 0.1632424032 - 0.0629681830 - 0.0391156510 - 0.143019404628319 | ENSMUST00000162903  | ENSMUSG000000023032  | Aebp2         |
| ENSMUST000000061372 | 8232.521961 - 0.321218133 - 0.155708521 - 2.0629451180 - 0.0391178420 - 0.143019603305941   | ENSMUST000000061372 | ENSMUSG000000047514  | Tsyp1         |
| ENSMUST00000123974  | 223.4585678 - 0.85827555 - 0.416086674 - 2.06273262 - 0.0391380380 - 0.143085623569123      | ENSMUST00000123974  | ENSMUSG000000025592  | Dach2         |
| ENSMUST00000187158  | 1347.1561150 - 0.347263818 - 0.168354424 - 2.062694938 - 0.0391416210 - 0.143090904325448   | ENSMUST00000187158  | ENSMUSG000000018347  | Zksacn6       |
| ENSMUST00000164999  | 133.31843770 - 0.518726097 - 0.251506129 - 2.062478950 - 0.0391621590 - 0.143150346096999   | ENSMUST00000164999  | NA                   | NA            |
| ENSMUST00000138859  | 12406.16827 - 0.316974882 - 0.1536861852 - 0.0624812940 - 0.0391619360 - 0.143150346096999  | ENSMUST00000138859  | ENSMUSG000000027363  | Usp8          |
| ENSMUST00000087265  | 42854.67251 - 0.38656584 - 0.187438331 - 2.06236283 - 0.0391732040 - 0.143182897751508      | ENSMUST00000087265  | ENSMUSG000000079255  | Brat1         |
| ENSMUST00000110806  | 2039.348286 - 0.379650480 - 0.1840903572 - 0.0623050870 - 0.0391786598 - 0.143195155512357  | ENSMUST00000110806  | ENSMUSG000000000148  | NA            |
| ENSMUST00000140685  | 3597.417465 - 0.324002939 - 0.157109389 - 2.062276099 - 0.0391814570 - 0.143197419376768    | ENSMUST00000140685  | ENSMUSG000000026473  | Glul          |
| ENSMUST00000141510  | 99.56470955 - 0.616685148 - 0.299039180 - 2.062219050 - 0.0391866140 - 0.143208454262552    | ENSMUST00000141510  | ENSMUSG000000029408  | Abcb9         |
| ENSMUST00000110983  | 30.72071706 - 0.868250709 - 0.421050325 - 0.0621067280 - 0.0391975750 - 0.143225040282343   | ENSMUST00000110983  | ENSMUSG000000029723  | Tsc22d4       |
| ENSMUST0000031738   | 30.72071706 - 0.868250709 - 0.421050325 - 0.0621067280 - 0.0391975750 - 0.143225040282343   | ENSMUST0000031738   | ENSMUSG000000029723  | Tsc2d4        |
| ENSMUST00000147018  | 143.9646124 - 0.675191520 - 0.327421804 - 2.06214586 - 0.0391938500 - 0.143225040282343     | ENSMUST00000147018  | ENSMUSG000000041650  | Pcca          |
| ENSMUST00000177286  | 1940.474149 - 0.38127797 - 0.184900902 - 2.06206658 - 0.0392013970 - 0.143231183062953      | ENSMUST00000177286  | ENSMUSG00000001909   | Trmt1         |
| ENSMUST00000085913  | 35.06636259 - 0.925298596 - 0.447610898 - 2.06202746 - 0.0392051210 - 0.143236968348019     | ENSMUST00000085913  | ENSMUSG00000007097   | Atp1a2        |
| ENSMUST00000103121  | 136.1949880 - 0.881021867 - 0.427281623 - 0.0619231410 - 0.0392150530 - 0.143265435350694   | ENSMUST00000103121  | ENSMUSG000000037813  | D630003M2Rik  |
| ENSMUST00000169280  | 114.5839378 - 0.682677332 - 0.301093985 - 0.0618501970 - 0.0392220000 - 0.143280213001772   | ENSMUST00000169280  | ENSMUSG000000024050  | Wiz           |
| ENSMUST00000127245  | 26.46861746 - 0.85348294 - 0.413943239 - 2.06183569 - 0.0392233810 - 0.143280213001772      | ENSMUST00000127245  | ENSMUSG000000026764  | Kif5c         |
| ENSMUST00000137921  | 49.33375690 - 0.930116751 - 0.4511204982 - 0.0617922580 - 0.0392275180 - 0.143287504375044  | ENSMUST00000137921  | ENSMUSG000000034488  | Edil3         |
| ENSMUST00000147806  | 155.0688370 - 0.526664184 - 0.2554489762 - 0.0617196860 - 0.0392344310 - 0.143298080823799  | ENSMUST00000147806  | ENSMUSG000000024871  | Doc2g         |
| ENSMUST00000076702  | 15278.449350 - 0.325922105 - 0.1580828602 - 0.0617168980 - 0.0392346960 - 0.143298080823799 | ENSMUST00000076702  | ENSMUSG000000064215  | ifit2         |
| ENSMUST00000334591  | 6754.678001 - 0.346871007 - 0.1682508302 - 0.0616302860 - 0.0392429480 - 0.143319682904688  | ENSMUST00000334591  | ENSMUSG000000032086  | Bace1         |
| ENSMUST00000158026  | 332.3509150 - 0.42987357 - 0.208513541 - 2.06160985 - 0.0392448940 - 0.143319682904688      | ENSMUST00000158026  | ENSMUSG000000088651  | Gm24853       |
| ENSMUST00000026608  | 2736.631751 - 0.26671079 - 0.139732218 - 2.06157704 - 0.0392480210 - 0.143323280313116      | ENSMUST00000026608  | ENSMUSG000000025532  | Crcp          |
| ENSMUST0000095806   | 377.9676325 - 0.58168044 - 0.282161573 - 2.06151545 - 0.0392538900 - 0.143336886893507      | ENSMUST0000095806   | ENSMUSG000000071369  | Map3k5        |
| ENSMUST00000153112  | 276.3210458 - 0.704873160 - 0.341944140 - 2.06136932 - 0.0392678190 - 0.143379927899804     | ENSMUST00000153112  | ENSMUSG000000013112  | Rtel1         |
| ENSMUST00000058470  | 11329.427780 - 0.433316023 - 0.2102187462 - 0.0612625190 - 0.0392780010 - 0.143409286237379 | ENSMUST00000058470  | ENSMUSG000000005198  | Polr2a        |
| ENSMUST00000171411  | 1325.995402 - 0.350413420 - 0.170007254 - 2.06116748 - 0.0392870640 - 0.14343543582225      | ENSMUST00000171411  | ENSMUSG000000017411  | Ikbpap        |
| ENSMUST00000005601  | 343.5068960 - 0.4623168690 - 0.224309120 - 0.0610703200 - 0.0392963310 - 0.14345911845977   | ENSMUST00000005601  | ENSMUSG000000005601  | NA            |
| ENSMUST0000099424   | 14304.556420 - 0.316700767 - 0.153659768 - 2.061051965 - 0.0392980820 - 0.14345911845977    | ENSMUST0000099424   | ENSMUST000000099424  | NA            |
| ENSMUST00000132281  | 748.0143385 - 0.40745078 - 0.197702454 - 2.06092931 - 0.0393097840 - 0.143494008275832      | ENSMUST00000132281  | ENSMUSG000000029059  | Fam213b       |
| ENSMUST00000136213  | 1805.185154 - 0.450571840 - 0.218634019 - 2.06084967 - 0.0393173830 - 0.143499886952625     | ENSMUST00000136213  | NA                   | NA            |
| ENSMUST00000117093  | 41.74058395 - 0.7700277140 - 0.373655421 - 2.0607963110 - 0.0393224760 - 0.143499886952625  | ENSMUST00000117093  | ENSMUSG000000032064  | Dixdc1        |
| ENSMUST0000098784   | 41.74058395 - 0.7700277140 - 0.373655421 - 2.0607963110 - 0.0393224760 - 0.143499886952625  | ENSMUST0000098784   | NA                   | NA            |
| ENSMUST0000098941   | 5622.064421 - 0.36567827 - 0.177448677 - 2.06075514 - 0.0393264050 - 0.143499886952625      | ENSMUST0000098941   | ENSMUSG000000028049  | Scamp3        |
| ENSMUST00000159670  | 549.4525691 - 0.434103525 - 0.2106513002 - 0.0607683170 - 0.0393257660 - 0.143499886952625  | ENSMUST00000159670  | ENSMUSG0000000159670 | Agl           |
| ENSMUST0000030538   | 24331.97308 - 0.3496350460 - 0.169658221 - 2.060819939 - 0.0393202210 - 0.143499886952625   | ENSMUST0000030538   | ENSMUSG000000028757  | Ddost         |
| ENSMUST00000142554  | 8329.908858 - 0.313593007 - 0.152169078 - 2.0608195140 - 0.0393202620 - 0.143499886952625   | ENSMUST00000142554  | ENSMUSG000000062482  | Abli1         |
| ENSMUST00000144862  | 786.3198236 - 0.332729607 - 0.161471365 - 2.06061058 - 0.0393402060 - 0.14354241703576      | ENSMUST00000144862  | ENSMUSG000000000885  | Scrnh1        |
| ENSMUST00000129048  | 226.5837578 - 0.858786730 - 0.416824912 - 2.06030568 - 0.0393693270 - 0.14364083898263      | ENSMUST00000129048  | NA                   | NA            |
| ENSMUST00000145415  | 799.9392440 - 0.62240087 - 0.302145053 - 2.05994063 - 0.0394021660 - 0.143706296327902      | ENSMUST00000145415  | ENSMUSG000000043067  | Dpy19l1       |
| ENSMUST00000156524  | 291.1709498 - 0.64255908 - 0.311961835 - 2.05973619 - 0.0394237660 - 0.143823781674684      | ENSMUST00000156524  | ENSMUSG000000006058  | Gm15829       |
| ENSMUST0000042553   | 2101.824058 - 0.31192336 - 0.151444696 - 2.05956195 - 0.0394318250 - 0.143845339720164      | ENSMUST0000042553   | ENSMUSG000000042553  | Snf8          |
| ENSMUST00000111748  | 21.83750528 - 0.889074980 - 0.431675909 - 2.059589099 - 0.0394378390 - 0.14385943448867     | ENSMUST00000111748  | ENSMUSG000000041540  | Aqatg         |
| ENSMUST00000028841  | 346.689179 - 0.461285898 - 0.223974872 - 2.0595430790 - 0.0394422420 - 0.143867564380612    | ENSMUST00000028841  | ENSMUSG000000027363  | Sox5          |
| ENSMUST00000116666  | 14293.40721 - 0.316061723 - 0.153498771 - 2.0590505070 - 0.0394894000 - 0.144031813919319   | ENSMUST00000116666  | ENSMUSG000000028841  | Usp8          |
| ENSMUST00000108251  | 2154.976925 - 0.27160581 - 0.131928195 - 2.05873974 - 0.0395191760 - 0.144132562058838      | ENSMUST00000108251  | ENSMUSG000000039230  | Tbcd          |
| ENSMUST00000126534  | 5267.062282 - 0.290254977 - 0.140997647 - 2.0585802830 - 0.0395344630 - 0.144180456742872   | ENSMUST00000126534  | ENSMUSG000000020716  | Nf1           |
| ENSMUST00000142226  | 208.9821962 - 0.77440130 - 0.376204738 - 2.05845707 - 0.0395462780 - 0.144251685870308      | ENSMUST00000142226  | ENSMUSG000000033685  | Ucp2          |
| ENSMUST00000110416  | 3161.680148 - 0.349597859 - 0.169848175 - 2.0582962370 - 0.0395617050 - 0.14426408298862    | ENSMUST00000110416  | ENSMUSG0000000142226 | Ppard         |
| ENSMUST00000143115  | 14294.204620 - 0.315976255 - 0.153518582 - 2.058228065 - 0.0395682450 - 0.144280071040691   | ENSMUST00000143115  | ENSMUSG000000027363  | Usp8          |
| ENSMUST00000177364  | 1946.568244 - 0.279676428 - 0.135885405 - 2.058178565 - 0.0395729950 - 0.144289527813267    | ENSMUST00000177364  | ENSMUSG0000000143115 | Trp4cap       |
| ENSMUST00000128010  | 602.2269604 - 0.39348396 - 0.191185165 - 2.05813019 - 0.0395776370 - 0.144290730360491      | ENSMUST00000128010  | ENSMUSG000000001909  | Trmt1         |
| ENSMUST00000156339  | 46184.20121 - 0.283661895 - 0.137834396 - 2.05813614 - 0.0395770650 - 0.144290730360491     | ENSMUST00000156339  | ENSMUSG000000028692  | Akr1a1        |
| ENSMUST0000023867   | 1002.331836 - 0.323921939 - 0.157396376 - 2.0580012430 - 0.0395900130 - 0.144327988488519   | ENSMUST0000023867   | ENSMUSG000000029101  | Rgs12         |
| ENSMUST00000146665  | 3065.177466 - 0.42531521 - 0.206690698 - 2.05773755 - 0.0396153330 - 0.14433866416531       | ENSMUST00000146665  | ENSMUSG000000023104  | Rfc2          |
| ENSMUST00000100477  | 2146.605427 - 0.39702095 - 0.192937465 - 2.05777014 - 0.0396122030 - 0.14433866416531       | ENSMUST00000100477  | ENSMUSG000000033845  | Mrp15         |
| ENSMUST0000021634   | 286.9427976 - 0.52150094 - 0.253426792 - 2.05779721 - 0.0396096030 - 0.14433866416531       | ENSMUST0000021634   | NA                   | NA            |
| ENSMUST00000147183  | 317.5774634 - 0.8005052 - 0.389010798 - 2.05778483 - 0.0396107910 - 0.14433866416531        | ENSMUST00000147183  | ENSMUSG000000021213  | Akr1c13       |
| ENSMUST000000053271 | 3838.947252 - 0.39483774 - 0.191880264 - 2.05772983 - 0.0396160740 - 0.14433866416531       | ENSMUST000000053271 | ENSMUSG000000057236  | Rbbp4         |
| ENSMUST00000151912  | 36249.71632 - 0.264304560 - 0.128494932 - 2.05765591 - 0.0396231740 - 0.144401677803607     | ENSMUST00000151912  | NA                   | NA            |
| ENSMUST0000018476   | 139.7697282 - 0.78636236 - 0.382173230 - 2.057607140 - 0.0396278600 - 0.144410888353615     | ENSMUST0000         |                      |               |

ENSMUST0000075835 559.5929936 -0.64646783:0.314655042 -2.05452877:0.039924541:0.145175811396472  
ENSMUST0000025099 846.7367999 -0.47244301:0.229955248 -2.05449981:0.039927341:0.145178103930301  
ENSMUST00000166635 784.77619640.540978111:0.263341471:2.054283774:0.0399482340.145246116587492  
54.50663971:0.757150988:0.368583805:2.054216642:0.0399547280.145246116587492  
ENSMUST0000034868 6496.906730:0.353752909:0.172207559:2.054224052:0.039954011:0.145246116587492  
8162.892967 -0.36566785:0.178007214 -2.05423055:0.039953382:0.145246116587492  
15.29762616 -0.91105432:0.443511883 -2.05418243:0.039958037:0.14525026355503  
130.6153783:0.567421259:0.276277362:0.054104795:0.0399655500:1452696726010  
ENSMUST00000144380 1983.615897 -0.34798098:0.169412212 -2.05404899:0.0399704890.145279113761486  
1251.524851 -0.33461707:0.162907345 -2.05403308:0.0399724949.145279113761486  
ENSMUST00000443394 686.9581349:0.462723510:0.225283417:2.053961698:0.0399793980.145296334902437  
ENSMUST00000125318 885.7765487 -0.43262043:0.210630259 -2.05393296:0.0399821800.145298553760964  
3274.996423 -0.41479757:0.201984983 -2.05360598:0.040013842:0.145405717792861  
14427.72754:0.379892861:0.184990932:2.053575587:0.0400167860.145408522558363  
ENSMUST00000171598 1017.423569 -0.36811425:0.179260344 -2.05351752:0.040022411:0.145421064082896  
3553.945955:0.293208936:0.142788673:2.053446751:0.040029269:0.145430187547324  
61769.41323 -0.31980420:0.155739269 -2.05345902:0.040028079:0.145430187547324  
1506.575937:0.277749475:0.135264897:2.053374388:0.040036281:0.145447767712276  
ENSMUST00000098974 296.464547:0.263794283:0.128471295:2.053332481:0.040040342:0.145454625175805  
ENSMUST00000135220 526.5213061 -0.71853419:0.349960155 -2.05318859:0.040054290:0.14549739461238  
2998.216320:0.318083722:0.154924561:2.053152318:0.040057807:0.145502271012515  
ENSMUST00000069955 382.1486785:0.498608596:0.242864680:2.053030503:0.0400696190.145537276374428  
2240.942393 -0.354111650:0.172486708 -2.052979340:0.040074581:0.145547398788381  
ENSMUST00000054990 2036.537529:0.417440510:0.203336491 -2.05295422:0.040077017:0.145548346757925  
6327.994268 -0.28010649:0.136445783 -2.0527759:0.0400844501:0.145567441834615  
3157.752492 -0.33461835:0.163013534 -2.05270289:0.040101401:0.145621096216754  
6189.815632 -0.31139237:0.152591717 -2.05248608:0.040122445:0.14562705234984  
2450.970473:0.350730304:0.170879858:2.052496462:0.0401213480.145681705234984  
1797.493063 -0.36216702:0.176475497 -2.0522272:0.040148021:0.145756998402861  
ENSMUST00000131206 2228.812705 -0.34378627:0.167516921 -2.05224802:0.0401455630.145756998402861  
3197.445289 -0.30925114:0.150693755 -2.05218285:0.0401518940.145756998402861  
ENSMUST00000113830 783.0220107 -0.30292403:0.147609620 -2.05219709:0.0401505120.145756998402861  
1157.499260:0.325406459:0.158567817:2.052159541:0.0401541590.145757313700626  
924.49301740:0.325604029:0.158672625:2.052049170:0.0401648840.1457883331934  
2638.493944 -0.26599691:0.129653413 -2.05159979:0.0402085710.1459389002691  
ENSMUST00000137739 462.5088749 -0.72471126:0.353260989 -2.05148965:0.040219285:0.145969961834098  
15.50054199:0.931416419:0.454032679:2.051430351:0.040220550:0.14598298636678  
12316.93449:0.367148049:0.178989121:2.051231085:0.040244447:0.146037523462797  
5743.358740 -0.39937501:0.19469980 -2.05123292:0.040244268:0.146037523462797  
6302.408866 -0.36540228:0.178150778 -2.05108440:0.0402587280.1460751110852323  
495.3229581 -0.49467307:0.241180970 -2.05104519:0.040262545:0.1460751110852323  
11634.245540:0.903308078:0.440412087:2.051051967:0.040261886:0.1460751110852323  
285.2904585 -0.42340390:0.206427202 -2.05110519:0.040256703:0.1460751110852323  
1396.027682:0.338789085:0.165183084:2.050991398:0.0402677840.146082597811471  
25.02854065 -0.93119063:0.454031905 -2.05093656:0.0402731240.146094051092142  
3550.116856 -0.34067190:0.166129120 -2.05064532:0.0403014980.146181131823374  
51.25006815 -0.88712441:0.432604471 -2.05065937:0.0403001340.146181131823374  
424.3065010 -0.45943936:0.224061997 -2.05050106:0.0403155600.14622420956214  
42.16839589 -0.84014015:0.409752645 -2.05035933:0.0403293780.146266401067573  
845.7888441:0.389542306:0.189991105:2.050318644:0.0403333460.14627863021264  
1743.584301 -0.56546317:0.275813572 -2.05016442:0.0403483870.14631948303629  
1022.581181 -0.34597275:0.168760229 -2.05008466:0.0403561690.146339771174319  
180.7624427:0.469016692:0.228789839:2.050002280:0.0403642080.14636990843123  
1038.964453 -0.44706835:0.218085543 -2.04996784:0.0403675600.146365246315079  
7405.318539 -0.336662980:0.164235375 -2.04988102:0.040376041:0.146388035219946  
1865.358415:0.463562184:0.226146502:2.049831322:0.0403808930.146397695009962  
4087.381306 -0.29634761:0.144575308 -2.04978028:0.0403858760.146407827188281  
7091.105144 -0.35297173:0.172209527 -2.04966440:0.0403971900.146440909087685  
308.6522737 -0.391375330:0.190950183 -2.04962008:0.0404015180.146448667283307  
152.0099354:0.659340127:0.321710762:0.049481074:0.0404150960.14648949826598  
40.46428092 -0.729304620:0.355861343 -2.04940669:0.0404223630.146500416781446  
40.46428092 -0.729304620:0.355861343 -2.04940669:0.0404223630.146500416781446  
197.3372953:0.547737909:0.26777929:2.049319635:0.0404308690.14652331569152  
145.3438330:0.598325160:0.291967657:2.049285751:0.040434181:0.146527376516346  
874.43918130:0.567776359:0.277083461:2.0491167380:0.040450701:0.146579304459597  
1257.3915110:0.357961086:0.174669816:2.049024253:0.0404597430.146604131689871  
212.1507538:0.529680402:0.258506781:2.049000280:0.0404621120.14660477656362  
3502.806859:0.438505036:0.214015827:2.048937418:0.0404682340.146619021879224  
524.4356380:0.429921388:0.209837087:2.048834138:0.0404783360.146647680674707  
2345.536902 -0.51791146:0.252787196 -2.04880417:0.040481267:0.146650361233185  
5144.403789:0.422164213:0.206059462:2.048749468:0.0404866190.146657054811072  
852.5603137 -0.30432287:0.148543072 -2.04871808:0.0404896900.146657054811072  
13.61269908:0.920621384:0.449363482:2.048723185:0.0404891900.146657054811072  
687.9247098:0.460411501:0.2247401102:0.048639650:0.040497364:0.146668974111664  
406.3675902:0.361710190:0.176560487 -2.04864743:0.0404966020.146668974111664  
46.96188895:0.702702562:0.348032044:2.048504139:0.0405106260.14670986700383  
8009.816705:0.40461461:0.197537407 -2.04829363:0.0405312360.146745775987112  
4875.353760:0.554699748:0.270826182:2.0481762270.0405442740.146809455400854  
ENSMUST00000146521 38.64867234:0.781188038:0.381415503:2.048128698:0.0405473900.1468183693538  
2491.083041 -0.26009037:0.126996873 -2.04800613:0.0405593980.146853903327989  
4087.930131 -0.29618098:0.144634084 -2.04779519:0.0405800710.146912856011503  
4087.930131 -0.29618098:0.144634084 -2.04779519:0.0405800710.146912856011503  
8543.923285 -0.31027161:0.151526815 -2.04763500:0.0405957760.14696176182384  
1203.107054 -0.44498575:0.217337951 -2.04749594:0.0406094140.147003181338739  
10247.343520:0.239255025:0.116853992:2.047469836:0.0406119750.147004499530591  
118.6128073 -0.72420197:0.353717823 -2.047400229:0.0406187970.1470212416718596  
499.8890356 -0.35279548:0.172316825 -2.04736528:0.0406222320.14702571918589  
2382.9557330:0.276882869:0.135241172:0.047312446:0.0406274160.147035198720412  
456.3000746 -0.35993941:0.175812291 -2.04729380:0.0406292450.147035198720412  
735.3776527 -0.31048428:0.151683415 -2.04692310:0.040656340.147157066689308  
285.5863513 -0.59208778:0.289259885 -2.04690596:0.0406673180.147157066689308  
33.08368476 -0.78817575:0.385063831 -2.04687037:0.0406708130.147161753502969  
59.03588094:0.692807837:0.338506138:2.046662554:0.0406912280.14722766231797  
1466.661948:0.4828980140.235947577:0.4666021270.0406971650.147241184098577  
74.94600020:0.839866572:0.410388865:2.046514032:0.0407058230.14725658352579  
74.94600020:0.839866572:0.410388865:2.046514032:0.0407058230.14725658352579  
1668.5199640:0.514186580:0.251258266:2.0464464230.0407124680.14726470105269  
9.106404197 -0.91816301:0.448659053 -2.04646046:0.0407110880.14726470105269  
26.00122906:0.888118667:0.433989884:2.0464040710.0407166310.147271799683643  
803.7666601 -0.39119134:0.191170986 -2.04629033:0.0407278140.147340284148775  
32.043154772:0.915409812:0.447393631:2.046094867:0.0407470370.147355363452361  
1026.538516 -0.48547072:0.237271339 -2.04605718:0.0407505070.147355363452361  
44.58946365:0.862723084:0.421643354:2.0460967220.0407468550.147355363452361  
28012.16430 -0.33495796:0.163707751 -2.04607274:0.0407492140.147355363452361  
3820.592052 -0.564159280:0.275742155 -2.04596674:0.0407596420.147379573443816  
1289.468575 -0.42724292:0.208826955 -2.04591847:0.0407643920.147388783152453  
784.6108476 -0.41400948:0.202367200 -2.04583292:0.0407728110.147410857446677  
28010.77915 -0.33493760:0.163718689 -2.04581167:0.0407749030.147410857446677  
12320.255780:0.366483549:0.179150028:2.045679548:0.0407879090.147444177653364  
4356.636057 -0.30329243:0.184261941 -2.04565264:0.0407905580.147444177653364  
3207.9954130:0.307800763:0.150465929:2.045605898:0.0407907290.147444177653364  
276.24383210:0.540373222:0.2641769192:0.045497476:0.0408058370.147482854282811  
448.70079130:0.4573492130:0.223586332:2.0455150790:0.0408041040.147482854282811  
576.9461047 -0.48366147:0.236459329 -2.04543197:0.0408122890.147482854282811  
165.2070206:0.5642181480:0.275847929:2.0453956290:0.0408158690.14750317839263  
334.2854234 -0.58910077:0.288051212 -2.04512515:0.0408425210.1475915234772  
21250.65240:0.289286824:0.141454170:2.0450922210.0408457670.147595286242851  
1064.986590 -0.30791692:0.150572991 -2.04496783:0.0408580290.147631621141814

ENSMUST0000075835 NA NA  
ENSMUST0000025099 NA NA  
ENSMUST00000166635 NA NA  
ENSMUST0000040636 ENSMUSG00000040364 Sec1  
ENSMUST0000034868 ENSMUSG0000026034 Clk1  
ENSMUST0000021803 ENSMUST00000021803 Nup153  
ENSMUST00000166241 ENSMUSG00000036790 Slitrk2  
ENSMUST00000176416 ENSMUST00000032010 Usp2  
ENSMUST00000144380 ENSMUSG00000030335 Mrpl51  
ENSMUST00000443394 ENSMUST00000143394 Ralgapb  
ENSMUST0000043286 ENSMUSG00000038425 Poli  
ENSMUST00000125318 ENSMUST00000101166 Gm28496  
ENSMUST00000105327 ENSMUSG00000034902 Pip5k1c  
ENSMUST00000108889 ENSMUST00000020400 Tnlp1  
ENSMUST00000171598 ENSMUSG00000021906 Oxnad1  
ENSMUST00000120879 ENSMUST00000030990 Pgap2  
ENSMUST00000156217 ENSMUSG00000020458 Rtna  
ENSMUST00000128992 ENSMUST00000030688 Stk11  
ENSMUST00000098974 ENSMUSG00000071856 Mcc  
ENSMUST00000135220 ENSMUSG0000003438 Tmm50  
ENSMUST0000022586 ENSMUSG00000022009 Nufip1  
ENSMUST00000069955 NA NA  
ENSMUST00000040706 ENSMUSG00000038949 Cnst  
ENSMUST00000054990 ENSMUST00000027993 Trim2  
ENSMUST00000113230 ENSMUSG00000026254 Eif4e2  
ENSMUST00000171289 ENSMUSG00000053819 Camk2d  
ENSMUST00000034499 ENSMUST00000034499 Dcun1d5  
ENSMUST00000113441 NA NA  
ENSMUST00000177423 ENSMUSG00000001909 Trmt1  
ENSMUST00000131206 ENSMUSG00000025616 Usp16  
ENSMUST00000155520 ENSMUST00000005687 Bcas2  
ENSMUST00000113830 ENSMUSG00000026799 Med27  
ENSMUST00000130753 NA NA  
ENSMUST00000132726 ENSMUSG00000029726 Mecpe  
ENSMUST0000022228 ENSMUST00000022175 Cwc27  
ENSMUST00000137739 ENSMUSG00000018932 Map2k3  
ENSMUST00000170124 ENSMUSG00000090891 D6Eif2527e  
ENSMUST00000117611 ENSMUSG00000003863 Pld3  
ENSMUST00000012664 ENSMUSG00000023767 Srsf10  
ENSMUST00000049470 ENSMUSG00000042305 Tmem183a  
ENSMUST0000043693 ENSMUSG00000017815 Jade3  
ENSMUST00000139974 ENSMUSG00000001506 Col1a1  
ENSMUST00000123323 ENSMUSG000000068580 Zfyve19  
ENSMUST0000049714 ENSMUSG00000034940 Syrnrg  
ENSMUST00000167370 ENSMUST0000011845 Bco1  
ENSMUST00000176498 ENSMUSG00000030879 Mrpl17  
ENSMUST00000146488 ENSMUST00000146488 Etla4  
ENSMUST00000173153 ENSMUSG00000041354 Rgl2  
ENSMUST00000021837 ENSMUST00000021837 Serpinb9c  
ENSMUST00000128335 ENSMUSG00000034118 Tpst1  
ENSMUST00000085077 ENSMUST0000003768 Arnt2  
ENSMUST00000160517 ENSMUSG00000019795 Pcm1  
ENSMUST00000164389 NA NA  
ENSMUST00000160291 ENSMUSG00000034902 Pip5k1c  
ENSMUST0000022706 ENSMUST00000022190 Suc1a2  
ENSMUST00000134052 NA NA  
ENSMUST00000124436 ENSMUSG00000053768 Chchd3  
ENSMUST00000112260 ENSMUSG000000068882 Ssb  
ENSMUST00000155567 ENSMUST00000027427 Polr3f  
ENSMUST0000020506 NA NA  
ENSMUST0000031894 ENSMUSG00000029862 Clcn1  
ENSMUST00000114686 NA NA  
ENSMUST00000132752 ENSMUSG00000027130 Slic12a6  
ENSMUST00000170048 ENSMUSG00000090622 A930033H14Rik  
ENSMUST00000134483 ENSMUST00000134483 Amotl2  
ENSMUST00000133140 ENSMUSG00000020886 Dlg4  
ENSMUST00000049244 ENSMUST00000039763 Dnajc28  
ENSMUST0000078947 ENSMUSG00000035299 Mid1  
ENSMUST00000159907 ENSMUST00000029221 Slic30a9  
ENSMUST00000140369 ENSMUST00000020549 Elac2  
ENSMUST00000171108 ENSMUSG00000066215 Rail1  
ENSMUST00000132665 NA NA  
ENSMUST00000131234 ENSMUSG000000336062 Phf24  
ENSMUST00000121674 ENSMUST000000338425 Poli  
ENSMUST00000136242 ENSMUSG00000027551 Zfp64  
ENSMUST00000141160 NA NA  
ENSMUST00000169922 ENSMUSG00000078671 Chd2  
ENSMUST00000144639 ENSMUST00000038393 Twnip  
ENSMUST00000146521 ENSMUSG00000033486 Catsper2  
ENSMUST00000172419 ENSMUST00000021555 Naa35  
ENSMUST00000066379 ENSMUSG00000053768 Chchd3  
ENSMUST00000170916 NA NA  
ENSMUST00000159772 ENSMUSG00000021693 Kif2a  
ENSMUST00000163915 ENSMUST00000025875 Spinap17  
ENSMUST00000031625 ENSMUST00000029621 Arpc1a  
ENSMUST00000147874 ENSMUSG00000020389 Cdk13  
ENSMUST00000167985 ENSMUSG00000053819 Camk2d  
ENSMUST00000144248 ENSMUST00000035545 Leng8  
ENSMUST00000048718 ENSMUSG00000037922 Mmaa  
ENSMUST00000133180 ENSMUST00000029064 Tmem50b  
ENSMUST00000109618 ENSMUSG00000038241 Cep250  
ENSMUST00000142950 ENSMUST00000147115 Fam221a  
ENSMUST00000109144 NA NA  
ENSMUST00000038580 ENSMUSG00000016206 H2-M3  
ENSMUST000

|                     |                                                                                |                     |                      |          |
|---------------------|--------------------------------------------------------------------------------|---------------------|----------------------|----------|
| ENSMUST00000109885  | 2040.329696 0.337508138 0.165049548 2.044889804 0.040865723 0.147648802501546  | ENSMUST00000109885  | ENSMUSG000000031681  | Smad1    |
| ENSMUST00000154638  | 1112.153145 -0.43266199 0.211583607 -2.04487485 0.040867197 0.147648802501546  | ENSMUST00000154638  | ENSMUSG000000031352  | Hccs     |
| ENSMUST00000102731  | 14485.212280.378646607 0.185174607 2.044808482 0.040873743 0.147664478970303   | ENSMUST00000102731  | ENSMUSG000000020400  | Tnlp1    |
| ENSMUST00000149934  | 96.64816529 -0.61545132 0.300997512 -2.04470567 0.040883883 0.147693139105097  | ENSMUST00000149934  | ENSMUSG000000040451  | Sgms1    |
| ENSMUST00000126403  | 3733.636105 -0.53389809 0.26115555 -2.04468130 0.040886287 0.147693850799289   | ENSMUST00000126403  | ENSMUSG000000050803  | Sqrdl    |
| ENSMUST00000124993  | 27920.73941 -0.27331221 0.133684520 -2.04445672 0.040908447 0.1476592468444    | ENSMUST00000124993  | ENSMUSG000000012493  | Atp5b    |
| ENSMUST00000173999  | 7712.804074 0.267111473 0.130668814 2.044186857 0.040935090 0.147844445879728  | ENSMUST00000173999  | ENSMUSG000000037470  | Ugg11    |
| ENSMUST0000015749   | 4098.110320 -0.56487786 0.276331227 -2.04420567 0.040933232 0.147844445879728  | ENSMUST0000015749   | ENSMUSG000000015605  | Srf      |
| ENSMUST00000137633  | 1045.659792 0.342847225 0.167719575 2.044169407 0.040936814 0.147844445879728  | ENSMUST00000137633  | ENSMUSG000000023764  | Sfl1     |
| ENSMUST00000126532  | 7047.931281 0.520774039 0.254765521 2.044130766 0.0409406300 0.147852286666372 | ENSMUST00000126532  | ENSMUST000000075254  | Heg1     |
| ENSMUST00000139079  | 89.43694898 -0.74379549 0.363873842 -2.04410268 0.040943404 0.147852286196545  | ENSMUST00000139079  | ENSMUSG000000032519  | Slc25a38 |
| ENSMUST00000137710  | 270.2174826 0.453561544 0.221905925 2.043936156 0.040959854 0.147879770785175  | ENSMUST00000137710  | ENSMUST000000025486  | Sirt3    |
| ENSMUST00000145527  | 425.6014367 0.520269179 0.254541876 2.043943368 0.040959142 0.147879770785175  | ENSMUST00000145527  | ENSMUSG000000078350  | Smm1     |
| ENSMUST00000143164  | 383.3046098 -0.65634595 0.321116174 -2.04395170 0.0409583180 0.147879770785175 | ENSMUST00000143164  | ENSMUST000000068735  | Trp53111 |
| ENSMUST00000110057  | 877.2721555 0.659003814 0.322417185 2.043947545 0.040958729 0.147879770785175  | ENSMUST00000110057  | ENSMUSG000000051379  | Flrt3    |
| ENSMUST00000080418  | 6266.714956 0.370975471 0.181509343 2.043836770 0.040969675 0.147904168543235  | ENSMUST00000080418  | ENSMUST000000080418  | Nedd4l   |
| ENSMUST00000110390  | 1250.519057 0.733299520 0.358792093 2.04380669 0.040973243 0.147904168543235   | ENSMUST00000110390  | NA                   |          |
| ENSMUST00000135677  | 505.6551844 0.374270344 0.183124364 2.043804190 0.040972895 0.147904168543235  | ENSMUST00000135677  | ENSMUSG000000023791  | Ptgnx    |
| ENSMUST00000170658  | 6266.586133 0.70927344 0.181498242 2.04369662 0.040983527 0.14793331181164     | ENSMUST00000170658  | NA                   | NA       |
| ENSMUST00000171299  | 7507.710137 -0.30631110 0.149894969 -2.04350487 0.041002485 0.147993760410553  | ENSMUST00000171299  | NA                   | NA       |
| ENSMUST00000033933  | 12674.13599 0.371037549 0.181586158 2.043314056 0.041021359 0.14805389905548   | ENSMUST00000033933  | ENSMUST000000031532  | Saraf    |
| ENSMUST00000137794  | 1511.141123 -0.45050151 -0.220483041 -2.04324791 0.041027902 0.148068382128759 | ENSMUST00000137794  | ENSMUSG000000026127  | Imp4     |
| ENSMUST00000118482  | 14481.90847 0.378181715 0.185090246 2.043228761 0.041029797 0.148068382128759  | ENSMUST00000118482  | ENSMUSG000000020400  | Tnlp1    |
| ENSMUST00000131008  | 1431.833557 0.904448172 0.442676803 2.043134323 0.041039143 0.148094120664436  | ENSMUST00000131008  | ENSMUSG000000050914  | Ankrd37  |
| ENSMUST00000113698  | 693.2407649 0.361158379 0.176771205 2.043083751 0.041044148 0.148104195463075  | ENSMUST00000113698  | NA                   | NA       |
| ENSMUST00000021997  | 984.1773662 0.483523666 0.23668660 2.04304053 0.041048426 0.14811645635013     | ENSMUST00000021997  | ENSMUSG000000058900  | Rsl1     |
| ENSMUST00000111903  | 1526.932314 0.54448029 0.266514900 -2.04296381 0.0410560130 0.148131058099885  | ENSMUST00000111903  | NA                   | NA       |
| ENSMUST00000159723  | 2420.357327 -0.33774744 0.165326362 -2.04291341 0.0410610130 0.14814076521448  | ENSMUST00000159723  | ENSMUSG000000026335  | Zcrlb1   |
| ENSMUST00000161428  | 3690.756318 -0.29763396 0.145700750 -2.04277578 0.0410746380 0.148180146595556 | ENSMUST00000161428  | ENSMUST000000019795  | Pcm11    |
| ENSMUST00000172754  | 68.11047586 -0.77904336 0.381368158 -2.04275933 0.041076268 0.148180146595556  | ENSMUST00000172754  | ENSMUSG000000072984  | Mecom    |
| ENSMUST00000125678  | 11.48238173 -0.89265248 0.437008489 -2.04264333 0.041087750 0.148213603634714  | ENSMUST00000125678  | ENSMUST000000072644  | Nup62cl  |
| ENSMUST00000119316  | 307.8891825 -0.55062676 0.269592601 -2.04244017 0.041107880 0.14827825252484   | ENSMUST00000119316  | ENSMUSG000000025010  | Ccnj     |
| ENSMUST00000139425  | 166.5484373 0.576805552 0.282418093 2.042381723 0.041113681 0.14828406137241   | ENSMUST00000139425  | ENSMUST000000063919  | Srm4     |
| ENSMUST00000130194  | 534.495829 -0.35392661 0.173291340 -2.04237913 0.041113937 0.14828406137241    | ENSMUST00000130194  | ENSMUSG000000024160  | Spb3     |
| ENSMUST00000114534  | 11.66285032 0.926895743 0.45387112 2.042173520 0.0411343380 0.148349646186861  | ENSMUST00000114534  | ENSMUST000000079845  | Xlr4a    |
| ENSMUST00000102730  | 14479.22042 0.377900185 0.185051410 2.042136210 0.041138021 0.148354933507154  | ENSMUST00000102730  | ENSMUSG000000028400  | Tnlp1    |
| ENSMUST00000090237  | 23.59435810 0.899047720 0.440269302 2.042040439 0.0411475200 0.148373194926022 | ENSMUST00000090237  | ENSMUST0000000090237 | Gm10244  |
| ENSMUST00000115660  | 4611.865232 0.357716322 0.175174279 2.042059617 0.041145617 0.148373194926022  | ENSMUST00000115660  | ENSMUSG000000031565  | Slc35a2  |
| ENSMUST00000126293  | 422.9883929 0.472560501 0.231451724 2.041723830 0.0411789330 0.148478467136854 | ENSMUST00000126293  | ENSMUST0000000126293 | Ms12     |
| ENSMUST00000133022  | 8178.535216 0.296592698 0.145272930 2.041623986 0.041188844 0.148506199848708  | ENSMUST00000133022  | NA                   | NA       |
| ENSMUST00000033915  | 15.06882449 -0.83301756 0.4080041494 -2.04150209 0.041200946 0.148541830241596 | ENSMUST00000033915  | ENSMUSG000000031517  | Gpm6a    |
| ENSMUST00000132571  | 22.97732051 -0.90026948 0.440097254 -2.04144011 0.041207101 0.148548188177308  | ENSMUST00000132571  | ENSMUSG000000086287  | Gm15972  |
| ENSMUST00000130106  | 448.8885772 0.356334490 0.174552500 2.041417271 0.041209369 0.148548188177308  | ENSMUST00000130106  | ENSMUST000000017708  | Fam76b   |
| ENSMUST00000138561  | 691.6891573 -0.37834178 0.185331900 -2.04142827 0.041208276 0.148548188177308  | ENSMUST00000138561  | ENSMUSG000000039298  | Cdk5rap2 |
| ENSMUST00000026925  | 2997.146520 0.301056640 0.147485649 2.041260571 0.041224933 0.148596290235116  | ENSMUST00000026925  | NA                   | NA       |
| ENSMUST00000067556  | 2128.575881 -0.29187026 0.142994890 -2.04112374 0.041238529 0.14862648465519   | ENSMUST00000067556  | ENSMUSG000000044906  | NA       |
| ENSMUST00000124111  | 79.25189206 0.837046136 0.410092686 2.041114520 0.041239445 0.14862648465519   | ENSMUST00000124111  | ENSMUSG000000042625  | NA       |
| ENSMUST00000156571  | 836.9328431 0.525133094 0.257278352 2.041108745 0.041240019 0.14862648465519   | ENSMUST00000156571  | ENSMUST000000015671  | NA       |
| ENSMUST00000167504  | 1251.914522 0.660234210 0.323483612 2.041012850 0.041249549 0.14865299012477   | ENSMUST00000167504  | ENSMUSG000000091537  | NA       |
| ENSMUST00000171436  | 7223.636395 -0.34696860 0.170024827 -2.04069375 0.041281276 0.148759312873211  | ENSMUST00000171436  | ENSMUST000000017436  | NA       |
| ENSMUST00000125991  | 7457.538320 -0.33760632 0.165462919 -2.04037454 0.041313035 0.148865743342193  | ENSMUST00000125991  | ENSMUSG000000039382  | NA       |
| ENSMUST00000126719  | 701.9362548 0.513595587 0.251742414 2.040310613 0.041319398 0.1487795675146    | ENSMUST00000126719  | ENSMUST0000000126719 | NA       |
| ENSMUST00000142536  | 405.8387285 0.574827257 0.281736111 2.040303797 0.041320076 0.1487795675146    | ENSMUST00000142536  | ENSMUSG000000037773  | NA       |
| ENSMUST00000108830  | 1366.490943 0.394324290 0.193268731 2.040290162 0.041321434 0.1487795675146    | ENSMUST00000108830  | ENSMUST0000000108830 | NA       |
| ENSMUST00000133881  | 4379.655562 -0.30100443 0.147539553 -2.04016097 0.041334295 0.148910276560574  | ENSMUST00000133881  | ENSMUSG000000065482  | NA       |
| ENSMUST000000082149 | 1891.305513 -0.33600985 0.164703919 -2.04008414 0.041341946 0.148929820397862  | ENSMUST000000082149 | ENSMUST000000033543  | NA       |
| ENSMUST00000155076  | 7412.634864 -0.26600202 0.130393682 -2.03999161 0.041351160 0.14894822656387   | ENSMUST00000155076  | ENSMUST000000082149  | NA       |
| ENSMUST00000115327  | 154.623826 0.725964647 0.355867431 2.039986198 0.041351700 0.14894822656387    | ENSMUST00000115327  | ENSMUSG000000090222  | NA       |
| ENSMUST00000022476  | 902.8172752 0.348560085 0.170868585 2.039930771 0.041357221 0.14894933701383   | ENSMUST00000022476  | ENSMUST000000015327  | NA       |
| ENSMUST00000140729  | 3896.092784 0.452585283 0.221863152 2.039929928 0.041357305 0.14894933701383   | ENSMUST00000140729  | ENSMUSG000000021916  | NA       |
| ENSMUST00000104933  | 1129.126251 -0.34494927 0.169099576 -2.03991800 0.041358492 0.14894933701383   | ENSMUST00000104933  | ENSMUST0000000140729 | NA       |
| ENSMUST00000149884  | 318.6441631 -0.52441167 0.257100314 -2.03971619 0.041378601 0.149013735254215  | ENSMUST00000149884  | ENSMUSG000000078134  | NA       |
| ENSMUST00000041142  | 5813.568836 0.437567217 0.214527258 2.039681209 0.041382087 0.149018271562608  | ENSMUST00000041142  | ENSMUST0000000149884 | NA       |
| ENSMUST00000102544  | 64.96147417 0.698330195 0.342381546 2.039625682 0.041387622 0.149024013342279  | ENSMUST00000102544  | ENSMUSG000000042876  | NA       |
| ENSMUST00000119603  | 4968.955881 -0.41064173 0.210332417 2.03962052 0.041388136 0.149024013342279   | ENSMUST00000119603  | ENSMUST0000000102544 | NA       |
| ENSMUST00000138408  | 6227.744580 -0.24460344 0.119931543 -2.03952549 0.041397608 0.14905010267992   | ENSMUST00000138408  | ENSMUSG000000024776  | NA       |
| ENSMUST00000176653  | 1372.286058 -0.36408130 0.178516286 -2.03948508 0.041401637 0.14905588274066   | ENSMUST00000176653  | ENSMUST0000000138408 | NA       |
| ENSMUST00000136862  | 2164.377798 0.324934539 0.159329328 2.039389376 0.041411181 0.149071475135903  | ENSMUST00000136862  | ENSMUSG000000054611  | NA       |
| ENSMUST00000024572  | 426.4110516 0.439935230 0.215717649 2.039403042 0.041409819 0.149071475135903  | ENSMUST00000024572  | ENSMUST0000000136862 | NA       |
| ENSMUST00000113547  | 476.5615044 0.407141436 0.199640143 2.039376600 0.041412455 0.149071475135903  | ENSMUST00000113547  | ENSMUSG000000024572  | NA       |
| ENSMUST00000173073  | 20.55096483 0.881829676 0.432409504 2.039339254 0.041416180 0.149076863072698  | ENSMUST00000173073  | ENSMUST0000000113547 | NA       |
| ENSMUST00000023840  | 768.4555618 0.22394357 0.207154579 2.039029778 0.041447055 0.149099777998474   | ENSMUST00000023840  | ENSMUSG000000038056  | NA       |
| ENSMUST00000168584  | 21.42003322 0.903658725 0.443162036 2.039115830 0.041438468 0.149099777998474  | ENSMUST00000168584  | ENSMUST000000023840  | NA       |
| ENSMUST00000133935  | 3768.054259 0.456127584 0.223679922 2.039197700 0.041430300 0.149099777998474  | ENSMUST00000133935  | ENSMUSG000000021916  | NA       |
| ENSMUST00000174703  | 1281.305000 0.38550570 0.189125293 -2.03912813 0.041437240 0.149099777998474   | ENSMUST00000174703  | ENSMUST0000000133935 | NA       |
| ENSMUST00000109505  | 443.7817841 0.48447658 0.237576656 -2.03924319 0.041425761 0.149099777998474   | ENSMUST00000109505  | ENSMUSG000000022656  | NA       |
| ENSMUST00000142606  | 895.494965 0.40633223 0.190275542 -2.03904717 0.041445319 0.149099777998474    | ENSMUST00000142606  | ENSMUST0000000109505 | NA       |
| ENSMUST00000132746  | 241.3409687 0.615254984 0.301737965 2.039037362 0.041446290 0.149099777998474  | ENSMUST00000132746  | ENSMUSG000000039853  | NA       |
| ENSMUST00000111098  | 1457.858458 -0.31214324 0.153074159 -2.03916356 0.041433705 0.149099777998474  | ENSMUST00000111098  | ENSMUST0000000132746 | NA       |
| ENSMUST00000111099  | 427.2856204 0.779249659 0.382166241 2.039033213 0.041446712 0.149099777998474  | ENSMUST00000111098  | ENSMUSG00000003032   | NA       |
| ENSMUST00000111101  | 427.2856204 0.779249659 0.382166241 2.039033213 0.041446712 0.149099777998474  | ENSMUST00000111099  | ENSMUST000000011098  | NA       |
| ENSMUST00000133585  | 348.9358828 -0.37167514 0.182283568 -2.03899425 0.041450600 0.149104515993341  | ENSMUST00000133585  | ENSMUSG000000034518  | NA       |
| ENSMUST00000139285  | 386.3287020 -0.56874320 0.278941192 -2.03893586 0.041456428 0.149117463736036  | ENSMUST0000013928   |                      |          |

|                    |                                                                            |                    |                     |               |
|--------------------|----------------------------------------------------------------------------|--------------------|---------------------|---------------|
| ENSMUST0000077273  | 36790.306530.04271814870.2097844772.0362847730.04172127670.149782041920644 | ENSMUST00000077273 | ENSMUSG00000061731  | Ext1          |
| ENSMUST0000045004  | 2483.5964010.3837319560.1884461292.0362952460.0417207160.149782041920644   | ENSMUST0000045004  | ENSMUSG00000022946  | Dopey2        |
| ENSMUST00000159857 | 3812.9899720.3131100190.1537678282.0362518200.0417250750.1497858791411995  | ENSMUST00000159857 | NA                  | NA            |
| ENSMUST0000079237  | 383.93934170.5085438570.2497616512.0361166510.0417386430.14982654853303    | ENSMUST00000079237 | ENSMUSG00000069755  | Zfp125        |
| ENSMUST0000023352  | 2419.014627-0.330442330.162293248-2.036081850.0417421360.149831051236177   | ENSMUST0000023352  | ENSMUSG00000022672  | Pkrdc         |
| ENSMUST00000153242 | 1142.274890-0.487542610.2394562610.0346040370.0417463000.149837962051587   | ENSMUST00000153242 | ENSMUSG00000015342  | Ppp5c         |
| ENSMUST00000141014 | 2658.937083-0.339221510.166618699-2.035915000.0417588900.149859034915606   | ENSMUST00000141014 | ENSMUSG00000033029  | Lrig1         |
| ENSMUST00000148967 | 729.3187343-0.308849920.1516999620.235926190.0417577670.149859034915606    | ENSMUST00000148967 | NA                  | NA            |
| ENSMUST00000150545 | 6619.724108-0.374707670.184045698-2.035949070.0417554680.149859034915606   | ENSMUST00000150545 | ENSMUSG00000027472  | Pdrg1         |
| ENSMUST00000147334 | 210.43081680.7585420660.3725848842.0358906060.0417613410.15009793739068    | ENSMUST00000147334 | ENSMUSG00000014734  | Srpx          |
| ENSMUST0000058491  | 162.7673168-0.659991160.324226419-2.035587230.0417918200.149961126183479   | ENSMUST0000058491  | ENSMUSG00000049036  | Tmem121       |
| ENSMUST00000125685 | 92.45628397-0.811038430.398467681-2.035393260.0418113180.1500515000768798  | ENSMUST00000125685 | ENSMUSG00000012568  | Fam169b       |
| ENSMUST00000098378 | 92.45628397-0.811038430.398467681-2.035393260.0418113180.1500515000768798  | ENSMUST00000098378 | ENSMUSG000000074071 | Ccl27a        |
| ENSMUST00000133572 | 150.95070810.5884807590.2891288902.0353578570.0418148780.150019731633639   | ENSMUST00000133572 | ENSMUSG00000013357  | Cdtp          |
| ENSMUST0000032920  | 8899.141753-0.328546740.161433463-2.035183650.0418323970.150058448722997   | ENSMUST0000032920  | ENSMUSG00000030682  | Smarca5       |
| ENSMUST00000148455 | 1329.356384-0.365723960.179697467-2.035220500.0418286910.150058448722997   | ENSMUST00000148455 | ENSMUSG00000031715  | Gn12          |
| ENSMUST0000030684  | 7144.539742-0.2691035000.132224770-2.035197380.0418310160.150058448722997  | ENSMUST0000030684  | ENSMUSG00000028869  | Cpeb2         |
| ENSMUST00000169035 | 1282.9524210.3308509820.1625761592.0350522710.0418456130.150097811968554   | ENSMUST00000169035 | ENSMUSG00000016903  | Stk3          |
| ENSMUST00000128425 | 605.3788600-0.4150377470.203950732-2.034988880.0418519910.1501126349979    | ENSMUST00000128425 | ENSMUSG00000022329  | H2-K1         |
| ENSMUST00000173317 | 38803.194660.3778898080.1856988320.0349605900.0418548380.150114807861441   | ENSMUST00000173317 | ENSMUSG00000017331  | Fbxo31        |
| ENSMUST00000154577 | 124.42287980.5921268390.2909820422.0349257100.0418583480.150119351012383   | ENSMUST00000154577 | ENSMUSG00000059018  | NA            |
| ENSMUST00000190935 | 34.973497580.7896055370.3880798602.0346470320.0418864010.15021190795963    | ENSMUST00000190935 | ENSMUSG00000024802  | Mpdz          |
| ENSMUST00000141995 | 848.49643690.332329750.163348065-2.034488480.0419023260.150261117769207    | ENSMUST00000141995 | ENSMUSG00000024589  | Neid4d        |
| ENSMUST00000163516 | 6346.7521230.3610433300.1774771922.0343656860.0419147380.150297422080691   | ENSMUST00000163516 | ENSMUSG00000016351  | Wnt5a         |
| ENSMUST00000173035 | 16.871261240.9092575910.4469638482.0342978400.0419215740.150305826237554   | ENSMUST00000173035 | ENSMUSG00000029390  | Nco2041       |
| ENSMUST00000128479 | 76.99056640.8236466410.4048760252.0343181360.0419195290.150305826237554    | ENSMUST00000128479 | ENSMUSG00000012847  | Vtn           |
| ENSMUST00000133838 | 1807.8410770.311756030.153255211-2.034227920.0419286200.1503230296846      | ENSMUST00000133838 | ENSMUSG00000028700  | Pomgn1t       |
| ENSMUST00000148398 | 224.77384130.537215110.264112163-2.034041530.0419470470.150382332170681    | ENSMUST00000148398 | ENSMUSG00000032349  | Elov5         |
| ENSMUST00000167746 | 1257.9276850.7309513570.3593719272.0339689930.0419547210.15040049657689    | ENSMUST00000167746 | ENSMUSG00000016756  | Cmah          |
| ENSMUST00000001522 | 4365.307496-0.302559710.148756050-2.033932170.0419584340.150405748275543   | ENSMUST00000001522 | ENSMUSG00000001482  | Def8          |
| ENSMUST00000125880 | 3788.7844100.2767758290.1360831320.0338704380.0419646600.150420007959572   | ENSMUST00000125880 | ENSMUSG00000030341  | Tnfrsf1a      |
| ENSMUST00000156280 | 1161.6124130.3904534090.1919829352.0337922680.0419725440.150440210303654   | ENSMUST00000156280 | ENSMUSG00000015628  | SmeK2         |
| ENSMUST00000145164 | 970.0939520.4157887370.2004438002.0337556640.0419723600.150445386322927    | ENSMUST00000145164 | ENSMUSG00000045164  | Pisd-ps1      |
| ENSMUST00000019871 | 10.515490310.9233090100.4540512262.0334908420.0420029570.150492795137003   | ENSMUST00000019871 | NA                  | NA            |
| ENSMUST00000167295 | 10.515490310.9233090100.4540512262.0334908420.0420029570.150492795137003   | ENSMUST00000167295 | ENSMUSG00000167295  | NA            |
| ENSMUST00000143269 | 39.03388744-0.768010380.377680490-2.033492330.0420028060.150492795137003   | ENSMUST00000143269 | ENSMUSG00000020926  | Adam11        |
| ENSMUST00000135459 | 1248.417426-0.297875240.1464782320.033580260.0419939380.150492795137003    | ENSMUST00000135459 | ENSMUSG00000014620  | Sap30bp       |
| ENSMUST0000028972  | 1814.909456-0.336715480.165580106-2.033550340.0419969520.150492795137003   | ENSMUST0000028972  | ENSMUSG00000051730  | Mettl5        |
| ENSMUST0000027050  | 6618.501523-0.374258090.1840459602.033503470.0420016830.150492795137003    | ENSMUST0000027050  | ENSMUSG00000028972  | Pdrg1         |
| ENSMUST00000110391 | 8336.1907680.299146370.147111999-2.033460050.0420060640.150495869750638    | ENSMUST00000110391 | ENSMUSG00000027050  | Cops5         |
| ENSMUST00000154132 | 1257.4229810.7309176250.3594598652.0333775660.0420143920.150517644831074   | ENSMUST00000154132 | ENSMUSG000000110391 | Cmah          |
| ENSMUST00000167019 | 5049.786965-0.272077740.133816631-2.033213190.0420390880.150569040843129   | ENSMUST00000167019 | ENSMUSG00000015413  | Vta1          |
| ENSMUST00000151565 | 594.5736858-0.352684160.173470079-2.033112390.0420411690.150597450708477   | ENSMUST00000151565 | NA                  | NA            |
| ENSMUST00000133395 | 5457.8032230.3213905680.1580883362.0329809030.0420544550.15062962434804    | ENSMUST00000133395 | ENSMUSG00000011256  | Adam19        |
| ENSMUST00000014218 | 198.9605265-0.524507370.257999421-2.032978860.0420546580.15062962434804    | ENSMUST00000014218 | ENSMUSG00000013395  | Sulf2         |
| ENSMUST00000152600 | 2849.379620-0.341873730.168168537-2.032923300.0420602720.15064168724197    | ENSMUST00000152600 | ENSMUSG00000014074  | Rnf168        |
| ENSMUST00000160412 | 17842.365840.5013565360.2466326152.0328071230.0420720130.15067506216253    | ENSMUST00000160412 | ENSMUSG00000015260  | Nfs1344       |
| ENSMUST00000143511 | 29.27591830.8849251420.4353294112.0327713220.0420756310.15067506216253     | ENSMUST00000143511 | ENSMUSG00000021684  | Pde8b         |
| ENSMUST00000156322 | 1276.7743860.3082445290.1516368702.0327808730.0420746660.15067506216253    | ENSMUST00000156322 | ENSMUSG00000014351  | Zpr1          |
| ENSMUST00000133817 | 1164.376884-0.336586060.165583299-2.032729530.0420798550.15067569148552    | ENSMUST00000133817 | ENSMUSG00000015632  | Smyd5         |
| ENSMUST00000123599 | 589.0731147-0.407680460.200576376-2.032544790.0420985340.150723836724184   | ENSMUST00000123599 | ENSMUSG00000013381  | Prr14         |
| ENSMUST00000138854 | 1077.2994210.3603042650.1772731852.0324803470.0421005510.150745590182549   | ENSMUST00000138854 | ENSMUSG00000021290  | Auh           |
| ENSMUST00000124420 | 1244.45653050.3050104760.1500670752.0324942990.0421036400.150745590182549  | ENSMUST00000124420 | ENSMUSG00000013885  | Vps39         |
| ENSMUST00000137834 | 2588.107266-0.390939940.192351161-2.032428320.0421103120.150756361961854   | ENSMUST00000137834 | ENSMUSG00000025858  | Get4          |
| ENSMUST00000110384 | 2194.3775400.3233509910.1590983102.0323973900.0421134420.15075949160798    | ENSMUST00000110384 | ENSMUSG00000013784  | Ech1          |
| ENSMUST0000055018  | 981.65324860.6647751430.3270980412.0323421690.0421190280.150771430951282   | ENSMUST0000055018  | ENSMUSG00000036006  | Fam65b        |
| ENSMUST00000107571 | 14003.446740-0.415044900.204227613-2.032266350.0421266980.150782757463004  | ENSMUST00000107571 | ENSMUSG00000055018  | Lpar1         |
| ENSMUST00000156437 | 14003.446740-0.415044900.204227613-2.032266350.0421266980.150782757463004  | ENSMUST00000156437 | ENSMUSG00000010751  | Lpar1         |
| ENSMUST00000166214 | 2775.6892760.9115611180.4485837482.0320868100.0421448680.150839723101912   | ENSMUST00000166214 | ENSMUSG00000015637  | Adgrd1        |
| ENSMUST0000062626  | 20074.715800.2898840390.1426552282.0320603970.0421457410.150841224185209   | ENSMUST0000062626  | ENSMUSG00000026224  | Tbmbim6       |
| ENSMUST00000106316 | 243.36704070.4984906600.2453343002.0318832670.0421654740.150889264530473   | ENSMUST00000106316 | ENSMUSG00000063116  | Mxk1          |
| ENSMUST00000148265 | 1155.8710360.3807297300.1897372762.0318884860.0421649460.150889264530473   | ENSMUST00000148265 | ENSMUSG00000068917  | Clk2          |
| ENSMUST00000113676 | 7945.6914080.3847835070.18873846682.0317563770.0421783250.150927179011416  | ENSMUST00000113676 | ENSMUSG00000029221  | Slc30a9       |
| ENSMUST00000225050 | 494.46510150.3996654300.1967163012.0316843390.0421856220.150945218300173   | ENSMUST00000225050 | ENSMUSG00000029959  | Il6ra         |
| ENSMUST0000023507  | 5985.926824-0.278090500.136879602-2.031643130.0421887960.1509520811262135  | ENSMUST0000023507  | ENSMUSG00000026506  | Cn1a          |
| ENSMUST00000156008 | 11264.336830.3297657620.1623182822.0315996250.0421942040.150954069070751   | ENSMUST00000156008 | ENSMUSG00000023507  | Gsk3b         |
| ENSMUST00000139620 | 1090.289675-0.461172360.227000356-2.031593120.0421948630.150954069070751   | ENSMUST00000139620 | ENSMUSG00000013962  | Hspa14        |
| ENSMUST00000119712 | 213.36512100.4939591070.2431452272.0315393940.0422003070.150965475185419   | ENSMUST00000119712 | ENSMUSG00000030545  | Pex11a        |
| ENSMUST00000109119 | 72.91421917-0.665973680.327849337-2.031340630.0422204520.151029466960375   | ENSMUST00000109119 | ENSMUSG00000019712  | Cyp2r1        |
| ENSMUST00000150501 | 377.35934990.4387008540.2159737772.0312690680.0422277070.151047344172679   | ENSMUST00000150501 | ENSMUSG00000020364  | Zfp354a       |
| ENSMUST00000137064 | 979.73121380-0.615938290.303235747-2.031219280.0422327550.151057325747916  | ENSMUST00000137064 | ENSMUSG00000015050  | Zfp280c       |
| ENSMUST00000161603 | 1488.8930570.3681818940.1812661232.0311676990.0422379850.151067960051913   | ENSMUST00000161603 | ENSMUSG00000021460  | Auh           |
| ENSMUST00000108832 | 698.0784336-0.375488820.184867900-2.031119660.0422428570.15107730938547    | ENSMUST00000108832 | ENSMUSG00000016103  | NfyA          |
| ENSMUST00000099740 | 4371.5652130-0.302250720.148815584-2.031042110.0422507220.15109288724263   | ENSMUST00000099740 | ENSMUSG00000008832  | Def8          |
| ENSMUST00000131547 | 24.18099276-0.835289710.4411265287-2.031024110.0422525470.15109288724263   | ENSMUST00000131547 | ENSMUSG00000099740  | Taf7l         |
| ENSMUST00000115330 | 727.33681230.360319780.1818404592.031009930.0422539860.15109288724263      | ENSMUST00000115330 | ENSMUSG00000013154  | Mpdz          |
| ENSMUST00000105940 | 2012.1386180.2803678880.1380523632.0308807510.0422670920.151131676177678   | ENSMUST00000105940 | ENSMUSG00000015330  | Portia        |
| ENSMUST0000029268  | 8062.3134160.279790030.137769518-2.030855830.0422696210.151132640654659    | ENSMUST0000029268  | ENSMUSG00000010594  | Dnajc8        |
| ENSMUST00000151361 | 95.038719220.5816127820.2864128132.0306800370.0422874620.151188354170501   | ENSMUST00000151361 | ENSMUSG00000029268  | 1810062G17Rik |
| ENSMUST00000110386 | 3564.5260590.3802518450.1872674312.0305284430.0423028520.15122719288372    | ENSMUST00000110386 | ENSMUSG00000015136  | Plibd2        |
| ENSMUST00000129069 | 545.6757264-0.455243680.224198906-2.030534810.0423022060.15122719288372    | ENSMUST00000129069 | ENSMUSG00000010386  | Itprlp1       |
| ENSMUST00000108530 | 1635.930501-0.279947940.137882134-2.030342430.0423217430.15127858753139    | ENSMUST00000108530 | ENSMUSG00000012906  | Chchd3        |
| ENSMUST0000044663  | 7557.193035-0.291804030.143720315-2.030360390.0423199190.15127858753139    | ENSMUST0000044663  | ENSMUSG00000010853  | Nup88         |
| ENSMUST00000102688 | 3772.177830-0.421068120.207394797-2.030273300.0423287650.151295606984935   | ENSMUST00000102688 | ENSMUSG00000044663  | Gtpbb1        |
| ENSMUST00000129857 | 5038.                                                                      |                    |                     |               |

|                     |                                                                                |                    |                     |               |
|---------------------|--------------------------------------------------------------------------------|--------------------|---------------------|---------------|
| ENSMUST00000173666  | 1565.347228 -0.50203363 0.447613233 -0.02749111 0.04261221210.152024526121493  | ENSMUST00000173666 | ENSMUSG000000037894 | H2zfz         |
| ENSMUST00000097844  | 7514.964084 -0.30412273 0.150006910 -0.02739149 0.0426223900.152052731197555   | ENSMUST00000097844 | ENSMUST000000028676 | Srsf10        |
| ENSMUST00000126411  | 644.9981396 0.351262496 0.173261339 0.027356469 0.0426259700.152057395592873   | ENSMUST00000126411 | ENSMUSG000000043587 | Pxylp1        |
| ENSMUST00000105853  | 7515.280519 -0.30413058 0.150018326 -0.02728957 0.042632807 0.15207368383131   | ENSMUST00000105853 | ENSMUST000000105853 | Srsf10        |
| ENSMUST00000141379  | 537.9165847 0.357800086 0.176493192 0.027261203 0.042635706 0.152075914730432  | ENSMUST00000141379 | ENSMUST000000141379 | Rft1          |
| ENSMUST00000176414  | 656.544331 -0.37765482 0.186291990 -0.02721988 0.042639929 0.152082871397477   | ENSMUST00000176414 | ENSMUSG000000023058 | Ppp2r1b       |
| ENSMUST00000107250  | 1181.923525 0.368255289 0.181664937 0.0271112634 0.042650895 0.152113872751942 | ENSMUST00000107250 | NA                  | NA            |
| ENSMUST000000026972 | 1095.853722 -0.37045840 0.182756309 -0.02706217 0.042656054 0.152124166491778  | ENSMUST00000026972 | ENSMUSG000000025854 | Fam20c        |
| ENSMUST00000109091  | 985.1320875 -0.40228532 0.198460119 -0.02703356 0.042658979 0.152126491538993  | ENSMUST00000109091 | ENSMUST00000020387  | JadeC         |
| ENSMUST0000007046   | 649.1729039 0.382223975 0.188578373 0.026870672 0.0426705640.152153471818223   | ENSMUST0000007046  | ENSMUST00000007046  | Tmco6         |
| ENSMUST00000156752  | 3652.345392 -0.30637756 0.151155744 -0.02689991 0.0426726490.152153471818223   | ENSMUST00000156752 | ENSMUSG00000022201  | Zfr           |
| ENSMUST00000138938  | 92.11681137 0.682238756 0.336588858 0.026920203 0.0426705740.152153471818223   | ENSMUST00000138938 | ENSMUST00000138938  | Pde4d         |
| ENSMUST00000108088  | 1587.454222 -0.29139455 0.143764529 -0.02688769 0.042673898 0.152153471818223  | ENSMUST00000108088 | ENSMUSG00000038671  | Arfrp1        |
| ENSMUST00000004955  | 1640.179805 -0.36987146 0.182488269 -0.02682322 0.0426804500.152162669755028   | ENSMUST0000004955  | ENSMUST00000004955  | Prpsap2       |
| ENSMUST00000000958  | 1193.036746 -0.31060316 0.153250246 -0.02677107 0.0426858290.152173585233851   | ENSMUST000000958   | ENSMUST00000000958  | Top1mt        |
| ENSMUST00000126801  | 38.86840131 0.859963446 0.424340509 0.026588144 0.0427045500.152232211708251   | ENSMUST00000126801 | ENSMUST00000126801  | Lgap1         |
| ENSMUST00000025806  | 154.2907878 0.520654745 0.256916791 0.026550082 0.042708445 0.152237990111406  | ENSMUST00000025806 | ENSMUST00000025806  | Doc2g         |
| ENSMUST00000097651  | 90.54301157 -0.89987367 0.4445050879 -0.02651029 0.0427125190.152244399047536  | ENSMUST00000097651 | ENSMUST00000097651  | Nol4          |
| ENSMUST00000150354  | 1818.843825 -0.31065275 0.153300978 -0.02642384 0.0427213690.152263005812565   | ENSMUST00000150354 | ENSMUST00000150354  | Trap1         |
| ENSMUST00000170149  | 1409.907111 -0.31674292 0.156307049 -0.02641485 0.0427222890.152263005812565   | ENSMUST00000170149 | ENSMUSG00000003819  | Camk2d        |
| ENSMUST00000174545  | 2175.763490 -0.42913825 0.211774633 -0.02639122 0.0427247090.15226352041439    | ENSMUST00000174545 | ENSMUST00000174545  | Xpo4          |
| ENSMUST00000163796  | 1357.896604 -0.44142595 0.217852061 -0.02626476 0.0427376590.152285341413129   | ENSMUST00000163796 | ENSMUST00000163796  | Tspan17       |
| ENSMUST000000064347 | 25.3199845 -0.91842870 0.453750340 -0.02628763 0.0427353180.152285341413129    | ENSMUST00000064347 | ENSMUST00000064347  | Tmem171       |
| ENSMUST00000148756  | 611.6765808 -0.42733184 0.210894272 -0.02628473 0.0427356140.152285341413129   | ENSMUST00000148756 | ENSMUST00000148756  | Rva           |
| ENSMUST00000113232  | 6047.067115 -0.27654858 0.136496993 -0.02604158 0.0427605230.15235673520859    | ENSMUST00000113232 | ENSMUSG000000026254 | Eif4e2        |
| ENSMUST00000156427  | 241.5421660 0.583629199 0.288069346 0.026002445 0.0427645340.15235673520859    | ENSMUST00000156427 | ENSMUST00000156427  | Prrg1         |
| ENSMUST00000136390  | 2213.897184 -0.55732797 0.275087098 -0.02600549 0.0427642210.15235673520859    | ENSMUST00000136390 | ENSMUST00000136390  | Scrb          |
| ENSMUST00000176729  | 56.66167354 0.779287411 0.384680244 0.025805645 0.0427847050.152404285039688   | ENSMUST00000176729 | ENSMUST00000176729  | Ppp19a        |
| ENSMUST00000106035  | 21184.74204 0.286488098 0.141418942 0.025811350 0.0427841200.152404285039688   | ENSMUST00000106035 | ENSMUST00000106035  | Tmbim6        |
| ENSMUST00000008748  | 5660.94521 -0.37855647 0.186867012 -0.02580686 0.0427845800.152404285039688    | ENSMUST0000008748  | ENSMUSG00000008604  | Ubqln4        |
| ENSMUST00000145264  | 2404.601805 -0.45937842 0.226768365 -0.02576061 0.0427895210.152404505015422   | ENSMUST00000145264 | NA                  | NA            |
| ENSMUST00000107575  | 13962.39602 -0.41489933 0.204810665 -0.02577014 0.0427883440.152404505015422   | ENSMUST00000107575 | ENSMUST00000107575  | Lpar1         |
| ENSMUST00000019882  | 1101.704675 -0.44097892 0.217691872 -0.02570228 0.0427953020.152410167342441   | ENSMUST00000019882 | ENSMUSG000000019738 | Polr2i        |
| ENSMUST00000167467  | 1284.382087 0.328740806 0.162286765 0.025678470 0.0427977440.152410167342441   | ENSMUST00000167467 | NA                  | NA            |
| ENSMUST00000166713  | 1284.382087 0.328740806 0.162286765 0.025678470 0.0427977440.152410167342441   | ENSMUST00000166713 | ENSMUST00000166713  | Cpeb2         |
| ENSMUST00000146919  | 5544.817689 0.259947458 0.128348020 0.025332823 0.0428332000.152512083227974   | ENSMUST00000146919 | ENSMUST00000146919  | Whsc1l1       |
| ENSMUST00000171484  | 1096.269970 -0.53613079 0.264711977 -0.02533636 0.0428328360.152512083227974   | ENSMUST00000171484 | ENSMUST00000171484  | Thop1         |
| ENSMUST00000167587  | 293.7548327 -0.52789530 0.260644135 -0.02534886 0.0428315530.152512083227974   | ENSMUST00000167587 | ENSMUST00000167587  | NA            |
| ENSMUST000000085790 | 21.86879839 0.865312251 0.427267713 0.0252226510.0428445060.15252799383645     | ENSMUST00000085790 | ENSMUSG000000037336 | Mfsd2b        |
| ENSMUST00000136149  | 17.80770022 0.885964452 0.437464231 0.0252271820.0428440410.15252799383645     | ENSMUST00000136149 | ENSMUST00000136149  | Bach2os       |
| ENSMUST00000107574  | 13962.94484 -0.41484161 0.204837016 -0.02522779 0.0428439790.15252799383645    | ENSMUST00000107574 | ENSMUST00000107574  | Lpar1         |
| ENSMUST00000140544  | 1953.837779 0.402751135 0.198885082 0.0250746330.0428597010.152573969840449    | ENSMUST00000140544 | ENSMUST00000140544  | Ets2          |
| ENSMUST00000020485  | 373.6292488 0.618182363 0.305276025 0.024949801 0.0428678980.152595031601591   | ENSMUST00000020485 | ENSMUST00000020485  | Glt8d2        |
| ENSMUST00000165523  | 665.2017021 -0.45408589 0.224244374 -0.02496000 0.0428714700.152599631851262   | ENSMUST00000165523 | ENSMUST00000021906  | Oxnad1        |
| ENSMUST00000138836  | 214.4916523 -0.53386105 0.263644313 -0.02492913 0.0428746401.052602802463663   | ENSMUST00000138836 | ENSMUST00000138836  | Pcca          |
| ENSMUST00000027233  | 104.3618577 0.632238335 0.312247934 0.024795895 0.0428883260.15264391386216    | ENSMUST00000027233 | ENSMUST00000027233  | Slc9a4        |
| ENSMUST0000037623   | 4871.283381 0.545488694 0.269420070 0.024677280 0.042905130.1526786439537128   | ENSMUST0000037623  | ENSMUST0000037623   | Nrn1          |
| ENSMUST00000174837  | 193.8095190 0.517451431 0.255584355 0.0245817880.0429103250.15270544472264     | ENSMUST00000174837 | ENSMUST00000033249  | Hsf4          |
| ENSMUST00000176902  | 272.4451281 0.452770184 0.223604123 0.0245480920.0429137880.1527096476627      | ENSMUST00000176902 | ENSMUST00000176902  | Reli2         |
| ENSMUST00000123504  | 1280.903342 -0.35254470 0.174145679 -0.02442404 0.0429265390.152746897594413   | ENSMUST00000123504 | ENSMUST00000051557  | Pus1l         |
| ENSMUST00000124825  | 142.5535467 0.850370074 0.420079240 0.0243087310.0429383950.152780962758186    | ENSMUST00000124825 | ENSMUST00000124825  | Pde11a        |
| ENSMUST00000140264  | 653.8271307 0.419932464 0.207462692 0.024134840 0.0429562790.152836469669907   | ENSMUST00000140264 | ENSMUST00000026113  | Inpp4a        |
| ENSMUST00000129551  | 44.32576935 -0.88150736 0.453520522 -0.02403174 0.042966880 0.152866075622652  | ENSMUST00000129551 | ENSMUST00000129551  | Gm2788        |
| ENSMUST00000152301  | 1659.559715 -0.37301934 0.184308264 -0.02388831 0.0429816440.152910455049551   | ENSMUST00000152301 | ENSMUST00000001909  | Trmt1         |
| ENSMUST00000141144  | 67.47483552 -0.643703140 0.318088247 -0.02366212 0.0430049270.15299515438885   | ENSMUST00000141144 | ENSMUST000000041144 | 2010107G23Rik |
| ENSMUST00000148330  | 6312.353757 0.344979787 0.170480467 0.023573689 0.0430140340.153009417379181   | ENSMUST00000148330 | ENSMUST00000026034  | Clk1          |
| ENSMUST00000172301  | 490.7065979 -0.50025972 0.247221032 -0.02353223 0.0430183030.153016468547342   | ENSMUST00000172301 | ENSMUST00000023943  | Slc29a1       |
| ENSMUST00000141273  | 3595.431541 -0.44336963 0.219109624 -0.02350597 0.0430210080.153017956051579   | ENSMUST00000141273 | ENSMUST00000020929  | Eftud2        |
| ENSMUST00000121077  | 528.6410318 0.359915811 0.177871079 0.0234644870.0430252810.153025021214738    | ENSMUST00000121077 | ENSMUST00000021437  | Pxylp1        |
| ENSMUST00000142042  | 6538.398889 -0.29322346 0.144918142 -0.02337303 0.0430347020.153050394214649   | ENSMUST00000142042 | ENSMUST00000027566  | Psm2f         |
| ENSMUST00000159644  | 748.5955796 0.429611183 0.212330752 0.0233111710.0430410750.153064925891106    | ENSMUST00000159644 | ENSMUST00000159644  | Hsf11b1       |
| ENSMUST00000113208  | 3627.042677 -0.33849000 0.169966032 -0.02328665 0.0430436020.153065776671658   | ENSMUST00000113208 | NA                  | NA            |
| ENSMUST00000107246  | 1720.320980 0.372369678 0.184056631 0.0231255710.0430602020.153116671746083    | ENSMUST00000107246 | ENSMUST00000107246  | Nfb           |
| ENSMUST000000084937 | 4136.306081 -0.40116440 0.198293934 -0.02307953 0.0430649470.153125408514374   | ENSMUST00000084937 | ENSMUST000000084937 | 2410002F23Rik |
| ENSMUST00000145456  | 385.7936673 -0.55319493 0.273445082 -0.02305679 0.0430672920.15312560877144    | ENSMUST00000145456 | ENSMUST00000145456  | Prps2         |
| ENSMUST00000144846  | 480.3630467 0.489507071 0.241973907 0.0229746140.0430757640.153131323442548    | ENSMUST00000144846 | ENSMUST00000029428  | Stx2          |
| ENSMUST0000026188   | 2709.672352 0.387229687 0.14156102 0.0229786170.0430753520.153131323442548     | ENSMUST0000026188  | ENSMUST00000026188  | R3hcc1l       |
| ENSMUST00000152897  | 143.6715529 -0.790680540 0.390850409 -0.02297484 0.0430757400.153131323442548  | ENSMUST00000152897 | ENSMUST00000034773  | BC030867      |
| ENSMUST0000032192   | 3627.171500 -0.34378052 -0.169944611 -0.02289746 0.0430837190.153135196946174  | ENSMUST0000032192  | ENSMUST00000032192  | Itpr1         |
| ENSMUST00000171006  | 3627.171500 -0.34378052 -0.169944611 -0.02289746 0.0430837190.153135196946174  | ENSMUST00000171006 | ENSMUST00000171006  | NA            |
| ENSMUST00000113207  | 3627.171500 -0.34378052 -0.169944611 -0.02289746 0.0430837190.153135196946174  | ENSMUST00000113207 | ENSMUST00000113207  | NA            |
| ENSMUST00000124818  | 1009.848013 -0.353064480 0.174551071 -0.02270020 0.0431040660.153191242475836  | ENSMUST00000124818 | ENSMUSG000000085156 | Gm11974       |
| ENSMUST00000044949  | 2420.619353 -0.37255646 0.184186351 -0.02271485 0.0431025530.153191242475836   | ENSMUST00000044949 | ENSMUST00000044949  | Dph1          |
| ENSMUST00000156501  | 18.67855386 0.913801673 0.451800575 0.0225774890.0431167260.153228100760376    | ENSMUST00000156501 | ENSMUST00000012819  | Cdh23         |
| ENSMUST00000176798  | 3553.710114 -0.43019608 0.212701490 -0.02253442 0.0431211700.153235754920646   | ENSMUST00000176798 | ENSMUST00000176798  | Ppp2r1b       |
| ENSMUST00000718373  | 68.92711670 -0.86703295 0.428708590 -0.02242963 0.0431319860.1532660494661767  | ENSMUST00000718373 | ENSMUST00000002342  | Serpinb9e     |
| ENSMUST00000171159  | 95.26898307 -0.90020065 0.445150691 -0.02223803 0.0431517660.15330095973999    | ENSMUST00000171159 | NA                  | NA            |
| ENSMUST000000061013 | 354.54170290 0.490730775 0.242668908 0.0222235260.0431532640.15330095973999    | ENSMUST00000061013 | ENSMUST000000079429 | Mroh2a        |
| ENSMUST00000113130  | 354.54170290 0.490730775 0.242668908 0.0222235260.0431532640.15330095973999    | ENSMUST00000113130 | ENSMUST00000079429  | Mroh2b        |
| ENSMUST00000161778  | 21160.716590 0.286685972 0.141765879 0.022494500 0.0431505870.15330095973999   | ENSMUST00000161778 | ENSMUST00000161778  | Tmbim6        |
| ENSMUST00000137278  | 301.0632770 -0.45386401 0.224429989 -0.02229666 0.0431457130.15330095973999    | ENSMUST00000137278 | ENSMUST00000137278  | Sreklip1      |
| ENSMUST00000145980  | 4753.974897 -0.28609649 0.141484252 -0.02210838 0.0431651560.153335062792208   | ENSMUST00000145980 | ENSMUST00000028557  | Rnf11         |
| ENSMUST00000120452  | 1301.452242 -0.35099199 0.173580732 -0.02206770 0.0431693570.15333968103245    | ENSMUST000001204   |                     |               |

|                    |                                                                                  |                    |                     |               |
|--------------------|----------------------------------------------------------------------------------|--------------------|---------------------|---------------|
| ENSMUST00000131087 | 1256.057029 0.411679614 0.203851027 2.019512085 0.043434022 0.153979546139759    | ENSMUST00000131087 | ENSMUSG00000048481  | Myppp         |
| ENSMUST00000102646 | 656.8031497 -0.58822055 0.291267634 -2.01951912 0.043433291 0.153979546139759    | ENSMUST00000102646 | ENSMUST00000076437  | 2700094K13Rik |
| ENSMUST00000165818 | 650.3918021 0.402745289 0.199431629 2.019465470 0.043438862 0.15398854728094     | ENSMUST00000165818 | NA                  | NA            |
| ENSMUST00000165251 | 377.7347562 -0.51709466 0.256065466 -2.01938462 0.0434472580 0.154005303717174   | ENSMUST00000061251 | ENSMUSG00000072694  | 1500011B03Rik |
| ENSMUST00000172597 | 930.3241990 -0.41420677 0.205116257 -2.01937563 0.043448192 0.154005303717174    | ENSMUST00000172597 | ENSMUSG00000021519  | MettF3        |
| ENSMUST0000023869  | 10590.19419 -0.38230109 0.189320936 -2.01932815 0.043453123 0.15401462325817     | ENSMUST0000023869  | ENSMUSG00000023106  | Denr          |
| ENSMUST00000153527 | 186.8614010 0.689700556 0.341559365 2.019269929 0.043459171 0.15402790320512     | ENSMUST00000153527 | ENSMUSG00000026360  | Rgs2          |
| ENSMUST00000137363 | 7751.610729 0.292285852 0.144750729 2.019235782 0.0434627180 0.154032317723771   | ENSMUST00000137363 | ENSMUSG00000049650  | CliP1         |
| ENSMUST00000128854 | 96.36937869 -0.83631747 0.141479187 -2.01914342 0.0434723160 0.154058165445929   | ENSMUST00000128854 | ENSMUSG00000020027  | Socs2         |
| ENSMUST00000153935 | 109.5732315 0.566808663 0.280725242 2.019086914 0.043478186190 0.154070816283067 | ENSMUST00000153935 | ENSMUSG00000025350  | Rdh5          |
| ENSMUST00000153440 | 1965.279461 0.3774094180 0.186923576 2.019057342 0.0434812590 0.154073547693725  | ENSMUST00000153440 | ENSMUSG00000000148  | Brat1         |
| ENSMUST00000423292 | 525.6587272 0.414260130 0.205190135 2.018908602 0.0434967200 0.154116453857949   | ENSMUST00000423292 | ENSMUSG00000037847  | Nmrk1         |
| ENSMUST00000138669 | 107.6634128 -0.77136888 0.382074503 -2.01889653 0.0434979740 0.154116453857949   | ENSMUST00000138669 | ENSMUSG00000027330  | Cdc25b        |
| ENSMUST00000168546 | 668.4409408 0.416821941 0.206477409 2.018729031 0.0435153900 0.154169998112607   | ENSMUST00000168546 | ENSMUSG00000026113  | Inpp4a        |
| ENSMUST00000109135 | 1479.639425 0.496663775 0.246045914 2.018581684 0.0435307160 0.154216129719252   | ENSMUST00000109135 | ENSMUSG00000044807  | Zfp354c       |
| ENSMUST00000170208 | 213.9523789 0.441893325 0.218919716 2.018517716 0.0435373700 0.15422823637109    | ENSMUST00000170208 | ENSMUSG00000031755  | Bbs2          |
| ENSMUST00000125992 | 17918.37427 -0.29678398 0.147031616 -2.01850456 0.0435387390 0.15422823637109    | ENSMUST00000125992 | ENSMUSG00000025393  | Atp5b         |
| ENSMUST00000032811 | 337.5217835 0.419536177 0.207850231 2.018454223 0.0435439770 0.154233995304889   | ENSMUST00000032811 | ENSMUSG00000030589  | Rasgrp4       |
| ENSMUST00000041475 | 48007.68226 -0.38544358 0.190960698 -2.01844459 0.0435449780 0.154233995304889   | ENSMUST00000041475 | ENSMUSG00000048612  | Myof          |
| ENSMUST00000107043 | 49.40693941 0.705174428 0.349404053 2.018220513 0.0435683000 0.154239195569203   | ENSMUST00000107043 | ENSMUSG00000037071  | Phkfb1        |
| ENSMUST00000031590 | 2615.410271 -0.52136692 0.258328020 -2.01823603 0.043566685 0.154239195569203    | ENSMUST00000031590 | ENSMUSG00000029594  | Rbm19         |
| ENSMUST00000272302 | 13.38116234 -0.90077059 0.446319276 -2.01822023 0.0435683290 0.154239195569203   | ENSMUST00000272302 | ENSMUSG00000026126  | Ptprn18       |
| ENSMUST00000168895 | 40.13175141 0.892135764 0.442009506 2.018363296 0.0435534390 0.154239195569203   | ENSMUST00000168895 | ENSMUSG00000038305  | Spats2l       |
| ENSMUST00000033450 | 4577.279776 0.37586804 0.186238410 -2.01820903 0.0435694095 0.154239195569203    | ENSMUST00000033450 | ENSMUSG00000033450  | Gpc4          |
| ENSMUST00000128105 | 3094.664680 0.541757271 0.268417295 2.018339657 0.0435588990 0.154239195569203   | ENSMUST00000128105 | ENSMUSG00000075254  | Heg1          |
| ENSMUST00000044682 | 8.406998188 0.912973763 0.452366378 2.018217547 0.0435686090 0.154239195569203   | ENSMUST00000044682 | ENSMUSG00000034579  | Plat2g        |
| ENSMUST00000102781 | 46248.80544 0.356730195 0.176740911 2.018379287 0.0435517740 0.154239195569203   | ENSMUST00000102781 | ENSMUSG00000028530  | Jak1          |
| ENSMUST00000143043 | 427.4233947 0.768954780 0.380991287 2.018300167 0.0435600090 0.154239195569203   | ENSMUST00000143043 | ENSMUSG00000016458  | Wt1           |
| ENSMUST00000116602 | 427.4233947 0.768954780 0.380991287 2.018300167 0.0435600090 0.154239195569203   | ENSMUST00000116602 | NA                  | NA            |
| ENSMUST00000172095 | 48010.42560 -0.38539087 0.190961218 -2.01816307 0.0435742800 0.15423981576401    | ENSMUST00000172095 | ENSMUSG00000048612  | Myof          |
| ENSMUST00000141650 | 4402.811763 0.416718249 0.206483772 2.018164640 0.0435741170 0.15423981576401    | ENSMUST00000141650 | ENSMUSG00000027074  | Slc43a3       |
| ENSMUST00000134673 | 8.902546168 0.913856463 0.452871198 2.017916939 0.0435999120 0.154311992276385   | ENSMUST00000134673 | ENSMUSG00000072591  | 5930412G12Rik |
| ENSMUST00000100497 | 202957.1252 -0.46842242 0.232134225 -2.01789470 0.0436022280 0.154311992276385   | ENSMUST00000100497 | ENSMUSG00000029580  | Actb          |
| ENSMUST00000125735 | 52336.70133 -0.32924995 0.163163124 -2.01791889 0.0435997090 0.154311992276385   | ENSMUST00000125735 | ENSMUSG00000020458  | Rtn4          |
| ENSMUST00000073388 | 444.7260289 -0.45757773 0.226761764 -2.01787870 0.0436038950 0.154311992276385   | ENSMUST00000073388 | ENSMUSG00000017718  | Afrmid        |
| ENSMUST00000113434 | 378.9027906 0.546685178 0.270924650 2.017849531 0.0436093490 0.154314587182546   | ENSMUST00000113434 | ENSMUSG00000079462  | Gm15737       |
| ENSMUST00000063814 | 3721.514438 -0.47568622 0.235755395 -2.017710870 0.0436213820 0.154332911412798  | ENSMUST00000063814 | ENSMUSG00000052102  | Gnpda1        |
| ENSMUST0000025485  | 6298.719378 0.367051292 0.181915320 2.017704128 0.0436220840 0.154332911412798   | ENSMUST0000025485  | NA                  | NA            |
| ENSMUST00000155502 | 4818.507517 0.593043068 0.293917469 2.017719701 0.0436204610 0.154332911412798   | ENSMUST00000155502 | ENSMUSG00000015502  | Loxl3         |
| ENSMUST00000108193 | 1020.955011 -0.43870176 0.217427826 -2.01768916 0.0436236440 0.154332911412798   | ENSMUST00000108193 | ENSMUSG00000019738  | Polr2i        |
| ENSMUST00000126746 | 1293.395742 0.313466398 0.155356029 2.017729204 0.0436194710 0.154332911412798   | ENSMUST00000126746 | ENSMUSG00000023764  | Sft1          |
| ENSMUST00000134124 | 164.37147740 0.549450915 0.272319963 2.017666671 0.0436259880 0.154333044655638  | ENSMUST00000134124 | ENSMUSG00000021062  | Rab15         |
| ENSMUST00000008844 | 99.75627878 -0.73849006 0.366057520 -2.01741535 0.0436521860 0.154417560176385   | ENSMUST00000008844 | ENSMUSG00000067786  | Nnat          |
| ENSMUST00000113673 | 8700.950539 -0.37129966 0.184070026 -2.01716526 0.0436782690 0.154468854205222   | ENSMUST00000113673 | ENSMUSG00000024914  | Drap1         |
| ENSMUST00000142025 | 9.499262150 0.882262876 0.437374844 2.017177916 0.0436769490 0.154468854205222   | ENSMUST00000142025 | ENSMUSG00000042658  | Gm9750        |
| ENSMUST00000142793 | 429.0938723 -0.50842269 0.252043009 -2.01720609 0.0436740100 0.154468854205222   | ENSMUST00000142793 | ENSMUSG00000028076  | Ctd1d         |
| ENSMUST00000132147 | 2751.016573 0.274683931 0.136170309 2.017208681 0.0436737400 0.154468854205222   | ENSMUST00000132147 | ENSMUSG00000043934  | Tmed4         |
| ENSMUST00000128558 | 10.25311665 0.899438687 0.445899280 2.017134198 0.0436815100 0.154468854205222   | ENSMUST00000128558 | ENSMUSG00000020354  | Sgcd          |
| ENSMUST00000123542 | 305.1403830 -0.43622114 0.216259240 -2.01712141 0.0436828440 0.154468854205222   | ENSMUST00000123542 | ENSMUSG00000018509  | Cenpv         |
| ENSMUST00000137500 | 145.7008470 -0.60886534 0.301838200 -2.01719115 0.0436755680 0.154468854205222   | ENSMUST00000137500 | ENSMUSG00000020532  | Acaca         |
| ENSMUST00000166191 | 12.30014628 -0.83010483 0.411545974 -2.01704034 0.0436913030 0.15449601833587    | ENSMUST00000166191 | ENSMUSG00000049303  | Syt12         |
| ENSMUST00000164247 | 29787.35090 0.365946399 0.181436710 2.016936920 0.0437020960 0.154512436861298   | ENSMUST00000164247 | NA                  | NA            |
| ENSMUST00000168309 | 859.9847639 0.352087151 0.174564957 2.016940612 0.0437017110 0.154512436861298   | ENSMUST00000168309 | ENSMUSG000000168309 | Aph1b         |
| ENSMUST00000132625 | 1250.524365 -0.43011027 0.213260069 -2.01683453 0.0437127830 0.154541696691967   | ENSMUST00000132625 | ENSMUSG00000033845  | Mpr15         |
| ENSMUST00000132901 | 80.23070912 0.689820564 0.342034899 2.016813389 0.0437149910 0.154541696691967   | ENSMUST00000132901 | ENSMUSG00000019087  | 4930447C04Rik |
| ENSMUST00000148168 | 7583.533353 -0.28915592 0.143390330 -2.01656499 0.0437409290 0.154625224979695   | ENSMUST00000148168 | ENSMUSG00000040667  | Nup88         |
| ENSMUST00000159576 | 783.8127158 0.385389927 0.191125765 2.016420589 0.0437560140 0.15466210175403    | ENSMUST00000159576 | ENSMUSG00000015976  | Alg9          |
| ENSMUST00000149017 | 151.9273712 0.653423959 0.324050223 2.016428047 0.0437552350 0.15466210175403    | ENSMUST00000149017 | ENSMUSG00000027695  | Pld1          |
| ENSMUST00000136579 | 8701.094231 -0.37102935 0.184034606 -2.01608470 0.0437911310 0.15477062245065    | ENSMUST00000136579 | ENSMUSG00000024914  | Drap1         |
| ENSMUST00000177020 | 9079.734239 0.372506090 0.184767251 2.016082868 0.0437913110 0.15477062245065    | ENSMUST00000177020 | ENSMUSG00000032336  | Nptrn         |
| ENSMUST00000002855 | 15384.16747 0.274159442 0.135993584 2.015973361 0.0438027610 0.154797147184966   | ENSMUST00000002855 | ENSMUSG00000001878  | Kdelr1        |
| ENSMUST00000206354 | 1966.187420 0.295762325 0.146711137 2.015950054 0.0438051980 0.154797147184966   | ENSMUST00000206354 | ENSMUSG00000025316  | Banp          |
| ENSMUST0000093321  | 23056.30648 0.317020768 0.157256667 2.015944726 0.0438057550 0.154797147184966   | ENSMUST0000093321  | ENSMUSG00000093321  | Grb10         |
| ENSMUST0000078538  | 1853.906470 0.325955214 0.161692062 2.015901142 0.0438103140 0.154798360154594   | ENSMUST0000078538  | NA                  | NA            |
| ENSMUST00000171475 | 164.6652004 0.557032785 0.276320034 2.015897207 0.0438107250 0.154798360154594   | ENSMUST00000171475 | ENSMUST00000171475  | NA            |
| ENSMUST00000208752 | 6214.080026 0.290081597 0.143915880 2.015632994 0.0438383660 0.1548878480872     | ENSMUST00000208752 | ENSMUSG00000027291  | Vps39         |
| ENSMUST00000155288 | 1395.387257 0.320233546 0.158880876 2.015557520 0.0438462650 0.15490575955723    | ENSMUST00000155288 | ENSMUSG00000020792  | Exoc7         |
| ENSMUST0000029082  | 13877.47201 -0.26768859 0.142746335 -2.01538338 0.0438644930 0.154963794986111   | ENSMUST0000029082  | ENSMUSG00000027566  | Psmr7         |
| ENSMUST00000134585 | 4731.525977 -0.27006050 0.134001706 -2.01535123 0.0438678590 0.154965705211085   | ENSMUST00000134585 | ENSMUSG00000018666  | Cbx1          |
| ENSMUST00000126819 | 812.9831364 0.418343650 0.207581164 2.015325672 0.0438705360 0.154968780449925   | ENSMUST00000126819 | ENSMUSG00000020806  | Rhbf2         |
| ENSMUST00000109880 | 11725.92216 -0.33685704 0.167165192 -2.01511476 0.0438926250 0.155038623800448   | ENSMUST00000109880 | NA                  | NA            |
| ENSMUST00000102501 | 6214.813297 0.290061246 0.143954521 2.014950588 0.0439098260 0.155091194774468   | ENSMUST00000102501 | ENSMUSG00000027291  | Vps39         |
| ENSMUST00000126751 | 21542.09647 -0.28984110 0.143854278 -2.01482436 0.0439230540 0.155129729800486   | ENSMUST00000126751 | ENSMUSG00000025393  | Atp5b         |
| ENSMUST00000159906 | 483.0668298 0.404321592 0.200680442 2.014753338 0.0439305000 0.155147837353473   | ENSMUST00000159906 | ENSMUSG00000025907  | Rbc1cc1       |
| ENSMUST00000154021 | 500.804986 -0.46963967 0.223118822 -2.01459354 0.0439472530 0.155198814654032    | ENSMUST00000154021 | ENSMUSG00000074825  | Itprp1l       |
| ENSMUST00000155559 | 2911.606488 0.899635261 0.446568794 2.014550216 0.0439517980 0.155206718207558   | ENSMUST00000155559 | ENSMUSG00000020614  | Fam20a        |
| ENSMUST00000166233 | 7927.971133 0.37656946 0.18697283 2.01451441 0.0439555530 0.155211740613801      | ENSMUST00000166233 | ENSMUSG00000023106  | Denr          |
| ENSMUST00000118984 | 75.74334977 0.838702477 0.416426978 2.0140445770 0.0440048580 0.155377645676165  | ENSMUST00000118984 | ENSMUSG000000082676 | Nk11843       |
| ENSMUST00000173051 | 261.6018240 -0.69447329 0.344851336 -2.01383385 0.0440269800 0.155447553508553   | ENSMUST00000173051 | ENSMUSG00000053716  | Dusp7         |
| ENSMUST00000133980 | 150.7319776 -0.57236531 0.284255214 -2.01356135 0.0440556070 0.155538303305479   | ENSMUST00000133980 | ENSMUSG00000059708  | Akap17b       |
| ENSMUST00000129492 | 2317.934039 -0.32709117 0.162445430 -2.01354494 0.0440573310 0.155538303305479   | ENSMUST00000129492 | ENSMUSG00000020265  | Sumo3         |
| ENSMUST00000130928 | 1578.338922 -0.319168                                                            |                    |                     |               |

|                    |                                                                            |                    |                     |               |
|--------------------|----------------------------------------------------------------------------|--------------------|---------------------|---------------|
| ENSMUST0000020938  | 2889.6204930.8983223680.4465753522.0115807190.0442641530.155955806073125   | ENSMUST0000020938  | ENSMUSG00000020614  | Fam20a        |
| ENSMUST00000110537 | 17.60439564-.8787730680.436861568-.2011462560.0442766200.15599518919441    | ENSMUST00000110537 | ENSMUST00000029244  | Duoxa1        |
| ENSMUST00000114871 | 3102.9725410.6660070540.3311102022.0114362240.0442794000.155992561219138   | ENSMUST00000114871 | ENSMUSG00000006518  | Hsf6t2        |
| ENSMUST0000050958  | 14.014208710.9083147860.4515798692.0114155810.0442815780.155992561219138   | ENSMUST0000050958  | ENSMUST00000009259  | Tmie          |
| ENSMUST00000152053 | 257.5311218-.0580122920.288447806-.2011188530.0443055460.156068775668499   | ENSMUST00000152053 | ENSMUSG00000089832  | Shkbp1        |
| ENSMUST00000144972 | 1265.1422810.8959321120.44454973652.0110828520.0443167060.156099870329492  | ENSMUST00000144972 | ENSMUST00000144972  | Fam20a        |
| ENSMUST00000149232 | 894.1659432-.464198240.230832276-.2010967610.0443288770.15613452427813     | ENSMUST00000149232 | ENSMUSG00000022678  | Ndk1          |
| ENSMUST00000135525 | 267.2918806-.488004120.242683930-.2010862940.0443399350.156165253651246    | ENSMUST00000135525 | ENSMUST00000135525  | Pkrag2        |
| ENSMUST00000152261 | 2429.9455940.4544422150.225991605-.2010792180.0443474120.156183365348934   | ENSMUST00000152261 | NA                  | NA            |
| ENSMUST00000098371 | 4294.3139500-.5783355520.287633886-.2010735010.0443534530.15619642866469   | ENSMUST00000098371 | ENSMUSG00000025790  | Slco3a1       |
| ENSMUST00000125673 | 1122.778270-.407335430.202591539-.2010624090.0443651760.156228854011137    | ENSMUST00000125673 | ENSMUSG00000029534  | St7           |
| ENSMUST00000148254 | 1235.0088050.3237710880.1610317772.0106037050.0443673320.156228854011137   | ENSMUST00000148254 | ENSMUST00000148254  | Grb10         |
| ENSMUST00000120988 | 1251.877047-.291557190.145020107-.2010460470.0443824750.156273954492021    | ENSMUST00000120988 | ENSMUSG00000028165  | Cisd2         |
| ENSMUST00000108388 | 496.2499299-.386473020.192235139-.2010418190.0443869460.156281472190201    | ENSMUST00000108388 | NA                  | NA            |
| ENSMUST00000069423 | 364.5739423-.7102555990.353343630-.2010099900.0444206160.156391793438004   | ENSMUST00000069423 | ENSMUSG00000027239  | Mdk           |
| ENSMUST00000159140 | 3676.8327570.4221050800.2100502562.0095432720.0444795500.156591043396528   | ENSMUST00000159140 | ENSMUST00000159140  | Tle3          |
| ENSMUST00000124476 | 1468.748400-.477603150.237675037-.2009479670.0444862880.156606524350236    | ENSMUST00000124476 | ENSMUST00000124476  | NA            |
| ENSMUST00000171735 | 2833.3777650.2839776190.1413287262.0093411070.0445009910.15663586313014    | ENSMUST00000171735 | ENSMUSG00000021910  | Nisch         |
| ENSMUST00000088172 | 3103.9989370.6654535920.3311810482.0093347560.0445016440.15663586313014    | ENSMUST00000088172 | ENSMUST000000662184 | Hsf6t2        |
| ENSMUST00000087114 | 647.4334444-.0533036410.265279664-.2009337640.0445013370.15663586313014    | ENSMUST00000087114 | ENSMUST00000087114  | Cenpq         |
| ENSMUST00000005671 | 5048.4790630.4148733520.2064828302.0092389890.0445117940.156650098301577   | ENSMUST00000005671 | ENSMUST00000005671  | Igf1r         |
| ENSMUST00000151066 | 13191.23284-.0276416400.137574791-.2009208250.0445150520.156650098301577   | ENSMUST00000151066 | ENSMUST00000005536  | Eef1d         |
| ENSMUST00000127908 | 132.33297120.6205484440.308852141-.2009208810.0445149930.156650098301577   | ENSMUST00000127908 | ENSMUST00000127908  | Ctnna1        |
| ENSMUST00000133544 | 7775.9622510.2665490240.1326601862.0092616480.0445093920.156650098301577   | ENSMUST00000133544 | ENSMUST00000026848  | Tor1b         |
| ENSMUST00000177218 | 882.53468330.4544942810.2262107092.0091634120.0445198060.156650352615783   | ENSMUST00000177218 | ENSMUST00000035934  | Pknox2        |
| ENSMUST00000080754 | 882.53468330.4544942810.2262107092.0091634120.0445198060.156650352615783   | ENSMUST00000080754 | ENSMUST00000080754  | Phmxo2        |
| ENSMUST00000147208 | 132.89310630.547005750.272263072-.2009107410.0445257430.156663005576009    | ENSMUST00000147208 | NA                  | NA            |
| ENSMUST00000133474 | 3079.8549150.3528404070.175622787-.2009081360.0445285050.156664485483923   | ENSMUST00000133474 | ENSMUST00000133474  | Ndufv1        |
| ENSMUST00000144328 | 1740.0541840.3740452140.1861846410.2090014530.0445369790.1567825776475     | ENSMUST00000144328 | ENSMUST00000004328  | Synn1         |
| ENSMUST00000126021 | 13926.333530.286150020.142433168-.2009012550.0445380020.15667825776475     | ENSMUST00000126021 | ENSMUST00000027566  | Psm2a         |
| ENSMUST00000133889 | 2339.1313560.3809334300.181380755-.2008510770.0445890420.156819758518211   | ENSMUST00000133889 | ENSMUST00000133889  | Mbd2          |
| ENSMUST00000147634 | 23.02301078-.883518740.439858412-.2008643510.0445749530.156794927814044    | ENSMUST00000147634 | ENSMUST00000085389  | 1700003M07Rik |
| ENSMUST00000174202 | 1782.871647-.457399290.227719495-.2008608400.0445786790.156799792886824    | ENSMUST00000174202 | ENSMUST00000174202  | Il1rap        |
| ENSMUST00000123045 | 305.65055650.5303129360.2640276502.0085507540.0445847980.156813073549982   | ENSMUST00000123045 | ENSMUST00000028549  | Ilgb3bp       |
| ENSMUST00000133889 | 1243.2221130.3643052000.181380755-.2008510770.0445890420.156819758518211   | ENSMUST00000133889 | ENSMUST00000165031  | Grf2h         |
| ENSMUST00000078362 | 938.45463320.395756270.197047601-.2008429780.0445976400.156837559602282    | ENSMUST00000078362 | ENSMUST00000078362  | Vrk2          |
| ENSMUST00000127714 | 2312.1928830.3766607260.1875429762.0083968710.0446011350.156837559602282   | ENSMUST00000127714 | ENSMUST00000026842  | Abi1          |
| ENSMUST00000028552 | 2505.2977660.335267690.166981749-.2008411790.0445995500.156837559602282    | ENSMUST00000028552 | ENSMUST00000028552  | Katnbl1       |
| ENSMUST00000132758 | 353.49681320.4696703500.2338639630.20083057860.0446108070.15686332882501   | ENSMUST00000132758 | ENSMUST00000132758  | Mysm1         |
| ENSMUST00000135783 | 674.87639290.3555397980.1770531082.0080969040.0446329950.156928458413069   | ENSMUST00000135783 | ENSMUST00000002205  | Vrk3          |
| ENSMUST00000176053 | 613.15689100.380340880.1894045600.2008087250.0446340190.156928458413069    | ENSMUST00000176053 | ENSMUST00000001909  | Trmt1         |
| ENSMUST00000150301 | 832.32491500.3612721390.1799159320.20080052650.0446427320.156950843249399  | ENSMUST00000150301 | ENSMUST00000044308  | Ubr3          |
| ENSMUST00000108108 | 3289.4094030.316119710.157441798-.2007851250.0446591300.15695626141847     | ENSMUST00000108108 | ENSMUST000000108108 | Ndufb6        |
| ENSMUST00000173434 | 1594.998529-.4535341510.225881761-.2007838760.0446604280.156996562141847   | ENSMUST00000173434 | ENSMUST00000028889  | Yrdc          |
| ENSMUST00000051484 | 1970.8871200.489102310.2436091230.2007733980.0446715660.157027468472008    | ENSMUST00000051484 | ENSMUST000000051484 | Mageh1        |
| ENSMUST00000039763 | 6744.2687250.2690969920.1340323162.0077023210.0446749330.15703150486143    | ENSMUST00000039763 | ENSMUST00000039763  | Gimm1         |
| ENSMUST00000124838 | 6743.9075110.2689641030.1339791710.2007506840.0446957220.157095873614122   | ENSMUST00000124838 | ENSMUST00000124838  | Gimm1         |
| ENSMUST00000123071 | 4081.476664-.353959570.176333039-.2007335530.0447139470.15715167832764     | ENSMUST00000123071 | ENSMUST00000038845  | Phb           |
| ENSMUST00000146114 | 15.05128681-.909769890.4532556140.2007189460.0447294920.15719805712093     | ENSMUST00000146114 | ENSMUST000000046114 | Chn2          |
| ENSMUST00000138337 | 1180.1093130.5509992860.2745169782.0071952270.0447327110.157201112434661   | ENSMUST00000138337 | ENSMUST00000073888  | Ccl27a        |
| ENSMUST00000168547 | 1145.8491030.389142930.1938841030.2007090470.0447400300.157218576607259    | ENSMUST00000168547 | ENSMUST00000168547  | Myg1          |
| ENSMUST00000148643 | 4682.187866-.366909350.182827279-.2006863310.0447642180.157295313263602    | ENSMUST00000148643 | ENSMUST00000148643  | Elmo2         |
| ENSMUST00000084986 | 81.611504680.8275134580.4123624472.0067624110.0447749670.157318051833691   | ENSMUST00000084986 | ENSMUST00000084986  | Aqp11         |
| ENSMUST00000151079 | 928.71346710.3902706630.1944781482.0067584310.0447753910.157318051833691   | ENSMUST00000151079 | ENSMUST00000024773  | Atg2a         |
| ENSMUST00000155009 | 10608.687790.4318179860.2151876220.0067045780.0447811280.15732949063638    | ENSMUST00000155009 | ENSMUST000000155009 | Serpinf1      |
| ENSMUST00000106290 | 22705.632620.4523336580.2254145282.0066748250.0447842980.157332826105756   | ENSMUST00000106290 | ENSMUST00000033880  | Lgals3bp      |
| ENSMUST00000142114 | 406.20471900-.531643260.2649466630.2006604860.0447917530.15733054961533    | ENSMUST00000142114 | ENSMUST00000042114  | Tarbp2        |
| ENSMUST00000078912 | 5667.808152-.0416075850.207359785-.2006540710.0447985890.157366509888391   | ENSMUST00000078912 | ENSMUST00000078912  | Ampd2         |
| ENSMUST00000135187 | 683.842466-.377090420.1879348030.2006495950.0448033600.15737006677207      | ENSMUST00000135187 | ENSMUST00000035187  | Eogt          |
| ENSMUST00000131472 | 381.31046030.6356391570.3168058552.0063996470.0448136250.157402803639991   | ENSMUST00000131472 | ENSMUST00000020844  | Nxn           |
| ENSMUST00000136069 | 675.07166710.3546746410.1767756850.2063542130.0448184690.157403632186035   | ENSMUST00000136069 | ENSMUST00000136069  | Vrk3          |
| ENSMUST00000119374 | 9.1855143890.8474769200.4223966512.0063533080.0448185660.157403632186035   | ENSMUST00000119374 | ENSMUST00000055761  | Nkain3        |
| ENSMUST00000020655 | 986.2077661-.396289750.197531527-.2006210120.0448338330.157432465218444    | ENSMUST00000020655 | ENSMUST00000020655  | Jade2         |
| ENSMUST00000109090 | 986.2077661-.396289750.197531527-.2006210120.0448338330.157432465218444    | ENSMUST00000109090 | ENSMUST000000109090 | Jade2         |
| ENSMUST00000150372 | 7950.6489920.2758231210.137482908-.2006235770.0448338330.157432465218444   | ENSMUST00000150372 | ENSMUST00000150372  | Psmb2         |
| ENSMUST00000042974 | 43.389056970.8261141090.411853561-.2005909790.0448658730.157528439246643   | ENSMUST00000042974 | ENSMUST00000042974  | Eva1a         |
| ENSMUST00000140762 | 125.95978920.5923221400.2952877982.0059147170.0448653470.157528439246643   | ENSMUST00000140762 | ENSMUST00000140762  | Pipp7         |
| ENSMUST00000160093 | 404.78953040.3930521020.1959580252.0057974240.0448778650.157562274750985   | ENSMUST00000160093 | ENSMUST00000042605  | Atxn2         |
| ENSMUST00000121489 | 517.7013936-.506053520.252323804-.2005571890.0449019430.157630272251529    | ENSMUST00000121489 | ENSMUST00000021489  | P2rx7         |
| ENSMUST00000020169 | 301.54066900.6248155210.3115397592.0055723260.0449018960.157630272251529   | ENSMUST00000020169 | ENSMUST00000020169  | Enpp3         |
| ENSMUST00000143759 | 1049.1867090.3607825430.1798949742.0055176280.0449077380.157634075576892   | ENSMUST00000143759 | ENSMUST00000143759  | Pgap2         |
| ENSMUST00000171106 | 7183.787486-.3573720000.178193908-.2005523130.0449071550.157634075576892   | ENSMUST00000171106 | ENSMUST00000071106  | Hnrmrd        |
| ENSMUST00000112535 | 1185.3796530.3051096890.1521381252.0054781860.0449119520.157640599174157   | ENSMUST00000112535 | NA                  | NA            |
| ENSMUST00000132444 | 336.91022130.398679910.198799541-.2005436800.0449163690.157647351301264    | ENSMUST00000132444 | ENSMUSG00000041650  | Pcca          |
| ENSMUST00000155918 | 416.95630490.5151910100.2551046752.0054160460.0449185870.157647351301264   | ENSMUST00000155918 | ENSMUST00000055918  | Chd6          |
| ENSMUST00000194411 | 3348.6784410.485100680.241803591-.2005347160.0449259450.15764906968661     | ENSMUST00000194411 | ENSMUSG000000019441 | Nop9          |
| ENSMUST00000172466 | 53.337725850.7216516050.3598926472.0051857410.0449431930.157717166364098   | ENSMUST00000172466 | NA                  | NA            |
| ENSMUST00000128583 | 21.871457770.8821061780.4399230162.0051375900.0449483390.1577453471087     | ENSMUST00000128583 | ENSMUSG00000027016  | Zfp385b       |
| ENSMUST00000171375 | 2080.5157170.288869780.1440686500.2005084240.0449540510.15777925157784     | ENSMUST00000171375 | NA                  | NA            |
| ENSMUST00000152100 | 5593.2389530.2633402200.1313390050.20050419930.0449588510.15777925157784   | ENSMUST00000152100 | ENSMUST00000036667  | Tcf1          |
| ENSMUST00000160929 | 1028.5573590.4294555910.2141810922.0051050570.0449581860.15777925157784    | ENSMUST00000160929 | ENSMUST00000016194  | Hsd11b1       |
| ENSMUST00000146408 | 737.49249830.895396620.4465421492.0050507260.0449576240.15777925157784     | ENSMUST00000146408 | ENSMUST00000020614  | Fam20a        |
| ENSMUST00000129785 | 130.75419710.842258810.4200816030.2004988560.0449642690.157741494331088    | ENSMUST00000129785 | ENSMUST00000036875  | Dna2          |
| ENSMUST00000092891 | 4587.55478050.3427568030.1709548780.20049547950.0449678790.157745889552279 | ENSMUST00000092891 | ENSMUST00000069806  | Cacng7        |
| ENSMUST00000109367 | 793.8118096-.669092500.348705769-.2004820570.0449822310.157787963256005    | ENSMUST00000109    |                     |               |

|                    |                                                                                             |                    |                      |               |
|--------------------|---------------------------------------------------------------------------------------------|--------------------|----------------------|---------------|
| ENSMUST00000161895 | 38.92837683 - 0.81489785 - 0.406956070 - 2.00242215 - 0.0452393470 - 0.158370095741155      | ENSMUST00000161895 | ENSMUSG00000060579   | Fhit          |
| ENSMUST00000065461 | 167.56043670 - 0.4733572730 - 0.236932502 - 0.0024145070 - 0.0452401690 - 0.158370095741155 | ENSMUST00000065461 | ENSMUSG000000065461  | Usp2          |
| ENSMUST00000160204 | 1419.885538 - 0.33371127 - 0.166652426 - 2.00243873 - 0.0452375650 - 0.158370095741155      | ENSMUST00000160204 | ENSMUSG00000035329   | Fbox33        |
| ENSMUST00000106046 | 10.22100654 - 0.861376902 - 0.430169757 - 2.0024115740 - 0.0452404840 - 0.158370095741155   | ENSMUST00000106046 | ENSMUSG000000106046  | Zbtb8b        |
| ENSMUST00000050342 | 10.22100654 - 0.861376902 - 0.430169757 - 2.0024115740 - 0.0452404840 - 0.158370095741155   | ENSMUST00000050342 | ENSMUSG000000448485  | Zbtb8b        |
| ENSMUST00000133503 | 49.63426904 - 0.879697309 - 0.439304726 - 2.0024763120 - 0.0452335280 - 0.158370095741155   | ENSMUST00000133503 | ENSMUSG00000044033   | Ccdc141       |
| ENSMUST00000034934 | 858.79225800 - 0.348724584 - 0.174174161 - 2.0021602560 - 0.0452674980 - 0.158456372231155  | ENSMUST00000034934 | ENSMUSG00000034934   | Aph1b         |
| ENSMUST00000176055 | 1902.117752 - 0.438081250 - 0.218813513 - 2.002075870 - 0.0452765720 - 0.158479844188455    | ENSMUST00000176055 | ENSMUSG00000032075   | Ppp2r1b       |
| ENSMUST00000175725 | 762.2036696 - 0.318580330 - 0.159138821 - 2.00190203 - 0.0452952680 - 0.158536993315568     | ENSMUST00000175725 | ENSMUSG00000028710   | Ataf1         |
| ENSMUST00000131347 | 24.61967783 - 0.858476700 - 0.428838141 - 2.00186648 - 0.0452990920 - 0.158542085444113     | ENSMUST00000131347 | NA                   | NA            |
| ENSMUST00000131146 | 1875.783139 - 0.31346727 - 0.156589634 - 2.00183922 - 0.0453020260 - 0.158544061094527      | ENSMUST00000131146 | ENSMUSG00000086718   | Gm16069       |
| ENSMUST00000156833 | 4359.999873 - 0.48592852 - 0.242750823 - 2.00175852 - 0.0453107080 - 0.158576513819689      | ENSMUST00000156833 | ENSMUSG00000040463   | Mybbp1a       |
| ENSMUST00000135144 | 98.31038312 - 0.646929309 - 0.32186705 - 2.0017200530 - 0.0453148480 - 0.158572348732081    | ENSMUST00000135144 | ENSMUSG00000086389   | Gm15998       |
| ENSMUST00000072021 | 843.7910545 - 0.49450580 - 0.247046009 - 2.00167491 - 0.0453197050 - 0.158581053459493      | ENSMUST00000072021 | NA                   | NA            |
| ENSMUST00000123978 | 181.3264550 - 0.708778903 - 0.354111808 - 2.0015681110 - 0.0453312010 - 0.158597725775132   | ENSMUST00000123978 | NA                   | NA            |
| ENSMUST00000145371 | 2504.328600 - 0.314819759 - 0.157286835 - 2.0015645910 - 0.0453315800 - 0.158597725775132   | ENSMUST00000145371 | ENSMUSG000000071074  | Yipf3         |
| ENSMUST00000024954 | 1693.660651 - 0.53885911 - 0.269218705 - 2.00156638 - 0.0453315800 - 0.158597725775132      | ENSMUST00000024954 | ENSMUSG00000024140   | Epas1         |
| ENSMUST0000015278  | 230.0287065 - 0.78646542 - 0.392946221 - 2.00145817 - 0.0453430360 - 0.158629512206987      | ENSMUST0000015278  | ENSMUSG000000015134  | Aldh1a3       |
| ENSMUST00000124344 | 453.8892817 - 0.407670790 - 0.203696789 - 2.00136090 - 0.0453535100 - 0.15865786061255      | ENSMUST00000124344 | ENSMUSG00000028245   | Nsmf4         |
| ENSMUST00000136519 | 1095.2780990 - 0.50757262 - 0.253632785 - 2.001228909 - 0.0453677260 - 0.15869296394946     | ENSMUST00000136519 | ENSMUSG000000139477  | Csr1          |
| ENSMUST00000073691 | 32761.344390 - 0.296546449 - 0.148189315 - 2.001132455 - 0.0453781170 - 0.158727346884201   | ENSMUST00000073691 | ENSMUSG00000023022   | Ulm1          |
| ENSMUST00000053336 | 2508.421967 - 0.322483594 - 0.161152686 - 2.001059160 - 0.0453809760 - 0.158728419742721    | ENSMUST00000053336 | ENSMUSG000000043391  | Z510009E07Rik |
| ENSMUST00000146966 | 24.76548911 - 0.81178016 - 0.405669891 - 2.00108557 - 0.0453831680 - 0.158728419742721      | ENSMUST00000146966 | ENSMUSG000000043572  | Par2          |
| ENSMUST00000006587 | 4993.290868 - 0.295035108 - 0.147440504 - 2.001045158 - 0.0453875230 - 0.158735356093924    | ENSMUST00000006587 | ENSMUSG00000090213   | Trnm189       |
| ENSMUST00000111309 | 364.6231219 - 0.70919598 - 0.354424020 - 2.00098171 - 0.0453943600 - 0.1587509714852        | ENSMUST00000111309 | ENSMUSG00000027239   | Mdk           |
| ENSMUST00000084953 | 5998.488962 - 0.29411425 - 0.146987796 - 2.00094334 - 0.045398495 - 0.15875135510778        | ENSMUST00000084953 | ENSMUSG00000007411   | Mark3         |
| ENSMUST00000112534 | 1184.9088430 - 0.304843075 - 0.152354095 - 2.000853370 - 0.0454047480 - 0.158770702213603   | ENSMUST00000112534 | ENSMUSG000000064247  | Picxd1        |
| ENSMUST00000131766 | 569.0861656 - 0.55694656 - 0.278362586 - 2.00079533 - 0.0454144500 - 0.158796331469216      | ENSMUST00000131766 | ENSMUSG00000036820   | Amdhd2        |
| ENSMUST00000069281 | 4813.9642340 - 0.437575349 - 0.21877094 - 2.0007368820 - 0.0454207520 - 0.15881069421367    | ENSMUST00000069281 | ENSMUSG0000002684    | Bfar          |
| ENSMUST00000128802 | 4942.0925970 - 0.328203321 - 0.174053677 - 2.0005513560 - 0.0454407600 - 0.158871723583801  | ENSMUST00000128802 | ENSMUSG00000020332   | Dhrs1         |
| ENSMUST00000022303 | 221.5402766 - 0.645791430 - 0.322812296 - 2.00051684 - 0.0454444830 - 0.15887643875122      | ENSMUST00000022303 | ENSMUSG00000021779   | Thrb          |
| ENSMUST00000136418 | 130.4235960 - 0.842336358 - 0.421065288 - 2.0004887150 - 0.0454457510 - 0.158878575958483   | ENSMUST00000136418 | ENSMUSG00000066113   | Adams11       |
| ENSMUST00000126908 | 8772.983361 - 0.373713750 - 0.186815036 - 2.00044795 - 0.0454519140 - 0.158888517226319     | ENSMUST00000126908 | ENSMUSG00000024914   | Drp1          |
| ENSMUST00000177530 | 374.0739046 - 0.395922817 - 0.197946430 - 2.0001513390 - 0.0454839240 - 0.158989409540136   | ENSMUST00000177530 | ENSMUSG00000050954   | Zfp169        |
| ENSMUST00000142750 | 10905.022150 - 0.687304514 - 0.343631271 - 2.0001221370 - 0.0454870760 - 0.158992123865826  | ENSMUST00000142750 | ENSMUSG00000032359   | Ctsh          |
| ENSMUST00000099105 | 953.9600125 - 0.532708710 - 0.266357112 - 1.99997931 - 0.0455024970 - 0.159037717031064     | ENSMUST00000099105 | ENSMUSG00000035268   | Pkig          |
| ENSMUST00000126915 | 185.0523860 - 0.440340030 - 0.220182750 - 1.9998843200 - 0.0455127560 - 0.159065266161039   | ENSMUST00000126915 | ENSMUSG000000092544  | Gm20422       |
| ENSMUST00000162510 | 956.7218928 - 0.34716012 - 0.173599267 - 1.999778730 - 0.0455241610 - 0.159088508622602     | ENSMUST00000162510 | ENSMUSG00000040331   | Nsmc4a        |
| ENSMUST00000139229 | 3376.267199 - 0.285007080 - 0.142519138 - 1.99978116 - 0.0455238990 - 0.159088508622602     | ENSMUST00000139229 | ENSMUSG00000027455   | Nsf11c        |
| ENSMUST0000007555  | 6002.359204 - 0.294063990 - 0.147053730 - 1.99970442 - 0.0455321900 - 0.159108255608763     | ENSMUST0000007555  | NA                   | NA            |
| ENSMUST00000147390 | 1270.147717 - 0.31328689 - 0.156674137 - 1.99960822 - 0.0455425850 - 0.159136270042139      | ENSMUST00000147390 | ENSMUSG00000028869   | Gnl2          |
| ENSMUST00000074967 | 967.7171208 - 0.39720841 - 0.198647224 - 1.99956688 - 0.0455470520 - 0.159143570087044      | ENSMUST00000074967 | NA                   | NA            |
| ENSMUST00000038406 | 9761.348082 - 0.398794820 - 0.199455297 - 1.99941959 - 0.0455629730 - 0.159190888120004     | ENSMUST00000038406 | ENSMUSG000000038406  | Akr1b8        |
| ENSMUST00000129654 | 1600.821461 - 0.29461360 - 0.147351659 - 1.99939114 - 0.0455660480 - 0.159193320575339      | ENSMUST00000129654 | ENSMUSG00000053768   | Chchd3        |
| ENSMUST00000129193 | 2545.9346240 - 0.291338686 - 0.145723314 - 1.9992592610 - 0.0455803090 - 0.159234829392844  | ENSMUST00000129193 | ENSMUSG000000023846  | Golga2        |
| ENSMUST00000163555 | 4458.383935 - 0.39880692 - 0.199483111 - 1.999201430 - 0.0455865630 - 0.159248364983367     | ENSMUST00000163555 | NA                   | NA            |
| ENSMUST00000170573 | 10.31705893 - 0.87346420 - 0.436939028 - 1.99905283 - 0.0456026370 - 0.159248559878279      | ENSMUST00000170573 | ENSMUSG000000090863  | AS30084C06Rik |
| ENSMUST00000173234 | 1949.668307 - 0.39533591 - 0.197762921 - 1.99903963 - 0.0456040650 - 0.159284559878279      | ENSMUST00000173234 | ENSMUSG00000028479   | Gne           |
| ENSMUST00000124630 | 248.13273000 - 0.518764612 - 0.259504428 - 1.999058807 - 0.0456019910 - 0.159284559878279   | ENSMUST00000124630 | ENSMUSG000000124630  | Ccdc28b       |
| ENSMUST00000130500 | 31857.281790 - 0.864158212 - 0.432294555 - 1.9990032300 - 0.0456080040 - 0.159290001893249  | ENSMUST00000130500 | ENSMUSG00000078566   | Bnip3         |
| ENSMUST00000162648 | 4061.8683300 - 0.397750523 - 0.198979469 - 1.989852580 - 0.0456134840 - 0.15930828449303    | ENSMUST00000162648 | ENSMUSG000000034930  | Kif11bp       |
| ENSMUST00000122873 | 6418.175982 - 0.37298178 - 0.186605163 - 1.99877527 - 0.0456326730 - 0.15935952773076       | ENSMUST00000122873 | ENSMUSG00000038965   | Ube2l3        |
| ENSMUST00000150835 | 2913.257336 - 0.358782820 - 0.197510629 - 1.99867176 - 0.0456438790 - 0.159390342596099     | ENSMUST00000150835 | ENSMUSG00000027404   | Snrpb         |
| ENSMUST00000118243 | 184.0108505 - 0.871401040 - 0.436003000 - 1.99861250 - 0.0456502960 - 0.159396116062026     | ENSMUST00000118243 | ENSMUSG00000038188   | Scar1         |
| ENSMUST00000071964 | 184.0108505 - 0.871401040 - 0.436003000 - 1.99861250 - 0.0456502960 - 0.159396116062026     | ENSMUST00000071964 | NA                   | NA            |
| ENSMUST00000146498 | 658.7629623 - 0.50695669 - 0.253666011 - 1.99852037 - 0.0456602720 - 0.1594226302727322     | ENSMUST00000146498 | ENSMUSG00000009566   | Fpgs          |
| ENSMUST00000151473 | 608.8352731 - 0.334885710 - 0.167578285 - 1.9983836790 - 0.0456750790 - 0.159466008153601   | ENSMUST00000151473 | ENSMUSG000000015473  | Ing3          |
| ENSMUST00000108192 | 1020.842335 - 0.435106880 - 0.217742768 - 1.99826101 - 0.0456883690 - 0.159487444230253     | ENSMUST00000108192 | ENSMUSG000000019738  | Polr2i        |
| ENSMUST00000075281 | 5985.542406 - 0.29485721 - 0.147555484 - 1.99828026 - 0.0456862840 - 0.159487444230253      | ENSMUST00000075281 | ENSMUSG000000075281  | Mark3         |
| ENSMUST00000103148 | 2390.3891770 - 0.269735508 - 0.134984016 - 1.998277400 - 0.0456865940 - 0.159487444230253   | ENSMUST00000103148 | ENSMUSG000000018537  | Pcgf2         |
| ENSMUST00000150317 | 98.85783338 - 0.585845380 - 0.293207788 - 1.99805533 - 0.0457106600 - 0.159556935482254     | ENSMUST00000150317 | ENSMUSG0000000150317 | Syme2         |
| ENSMUST00000142898 | 67.84261711 - 0.651169230 - 0.325948555 - 1.99776690 - 0.0457419370 - 0.159657779298699     | ENSMUST00000142898 | ENSMUSG000000301901  | Dus2          |
| ENSMUST00000105939 | 8079.838343 - 0.274786410 - 0.137561076 - 1.99755936 - 0.0457644520 - 0.159728036030823     | ENSMUST00000105939 | ENSMUSG00000005939   | Dnajc8        |
| ENSMUST00000139589 | 488.4766163 - 0.351235645 - 0.175836639 - 1.997511290 - 0.0457696860 - 0.159737972953699    | ENSMUST00000139589 | ENSMUSG00000026504   | Scdca8        |
| ENSMUST00000029305 | 3002.452896 - 0.296361599 - 0.148383025 - 1.9972742780 - 0.0457953950 - 0.159819363810312   | ENSMUST00000029305 | NA                   | NA            |
| ENSMUST00000005057 | 4063.740214 - 0.51977463 - 0.260246768 - 1.99723760 - 0.0457993780 - 0.159824926909726      | ENSMUST00000005057 | ENSMUSG000000004929  | Thop1         |
| ENSMUST00000161414 | 771.4994629 - 0.316578170 - 0.158510234 - 1.99720969 - 0.0458024010 - 0.15982716714614      | ENSMUST00000161414 | ENSMUSG000000029670  | Nsmc4a        |
| ENSMUST00000121184 | 12.49459583 - 0.90549075 - 0.453406358 - 1.99708438 - 0.0458160170 - 0.1598343621493131     | ENSMUST00000121184 | ENSMUSG00000025478   | Dpys4l        |
| ENSMUST00000160451 | 105.3579068 - 0.60739736 - 0.304144806 - 1.99706636 - 0.0458179740 - 0.1598343621493131     | ENSMUST00000160451 | ENSMUSG0000000160451 | Mybl1         |
| ENSMUST00000047850 | 4747.791696 - 0.43512964 - 0.217885251 - 1.99705874 - 0.0458188010 - 0.1598343621493131     | ENSMUST00000047850 | NA                   | NA            |
| ENSMUST00000021249 | 562.5908308 - 0.554511580 - 0.277662641 - 1.99706947 - 0.0458176360 - 0.1598343621493131    | ENSMUST00000021249 | ENSMUSG000000020877  | Scrn2         |
| ENSMUST00000126874 | 562.5908308 - 0.554511580 - 0.277662641 - 1.99706947 - 0.0458176360 - 0.1598343621493131    | ENSMUST00000126874 | ENSMUSG000000020877  | Scrn2         |
| ENSMUST00000105595 | 5714.141383 - 0.28055410 - 0.140479072 - 1.99712386 - 0.0458117290 - 0.1598343621493131     | ENSMUST00000105595 | ENSMUSG0000000105595 | Ssu72         |
| ENSMUST00000119413 | 2243.871301 - 0.31869450 - 0.159590514 - 1.99695144 - 0.0458304570 - 0.15986689741637       | ENSMUST00000119413 | ENSMUSG00000003543   | Gtf2a2        |
| ENSMUST00000055725 | 59.20510677 - 0.77779377 - 0.389514685 - 1.99682785 - 0.0458438860 - 0.159891721389219      | ENSMUST00000055725 | ENSMUSG000000044176  | Spinik10      |
| ENSMUST00000162365 | 59.20510677 - 0.77779377 - 0.389514685 - 1.99682785 - 0.0458438860 - 0.159891721389219      | ENSMUST00000162365 | ENSMUSG000000044176  | Spinik10      |
| ENSMUST00000126422 | 124.6062875 - 0.88389663 - 0.442652261 - 1.996819430 - 0.0458448010 - 0.159891721389219     | ENSMUST00000126422 | ENSMUSG000000047867  | Gimap6        |
| ENSMUST00000169562 | 8877.029751 - 0.36078182 - 0.180702718 - 1.996548940 - 0.0458742030 - 0.159895925107052     | ENSMUST00000169562 | NA                   | NA            |
| ENSMUST00000171433 | 2581.6099490 - 0.42466823 - 0.212568129 - 1.9963802840 - 0.0458952450 - 0.160041551863348   |                    |                      |               |

|                    |                                                                               |                    |                    |               |
|--------------------|-------------------------------------------------------------------------------|--------------------|--------------------|---------------|
| ENSMUST0000088758  | 1146.431486 -0.43005047 0.215730915 -1.99345778 0.0462113420.16080970300705   | ENSMUST0000088758  | NA                 | NA            |
| ENSMUST00000112830 | 1146.431486 -0.43005047 0.215730915 -1.99345778 0.0462113420.16080970300705   | ENSMUSG00000007827 | ENSMUSG00000007827 | Ankrd26       |
| ENSMUST00000145988 | 509.8526660.4460715080.223786202.1.9932931620.0462293540.16086401950321       | ENSMUSG00000030882 | ENSMUSG00000030882 | Dnhd1         |
| ENSMUST00000146897 | 24033.293680.5125061300.257125210.1.9936161830.0462377790.160884969971283     | ENSMUSG00000020048 | ENSMUSG00000020048 | Hsp90b1       |
| ENSMUST00000136431 | 1129.062981 -0.389242290.195285991 -1.99319109 0.0462405260.160886160407764   | ENSMUSG00000020253 | ENSMUSG00000020253 | Ppm1m         |
| ENSMUST00000165823 | 3058.304452 -0.28262050.0141799508 -1.99309932 0.0462505720.160908130127235   | NA                 | NA                 | NA            |
| ENSMUST00000041045 | 2563.309421 -0.479755790.240709613 -1.99308948 0.0462516490.160908130127235   | ENSMUSG00000037894 | ENSMUSG00000037894 | H2fafz        |
| ENSMUST00000025732 | 1331.712227 0.4304183640.215961462.1.993032000.046257811 0.160921201934765    | ENSMUSG00000025732 | ENSMUSG00000025732 | Slc25a45      |
| ENSMUST00000044684 | 861.6449485 -0.479181590.240437733 -1.99295502 0.0462663710.160933726652071   | ENSMUSG00000035266 | ENSMUSG00000035266 | Helq          |
| ENSMUST00000128574 | 2114.663136 -0.40979659 0.205624865 -1.99293306 0.046268760.160933726652071   | ENSMUST00000128574 | ENSMUST00000128574 | Trim2         |
| ENSMUST00000125344 | 21.803860720.869723921.04364084881.9929124770.0462710310.160933726652071      | ENSMUSG00000037336 | ENSMUSG00000037336 | Mfsd2b        |
| ENSMUST00000131488 | 1035.472514 0.3141384360.1576247771.9929508660.0462688270.160933726652071     | ENSMUST00000131488 | ENSMUST00000131488 | Cdc42ep4      |
| ENSMUST00000143196 | 1341.211571 -0.31354497 0.157332070 -1.99288660 0.0462738650.160935217290072  | ENSMUSG00000029062 | ENSMUSG00000029062 | Cdk11b        |
| ENSMUST0000018681  | 2404.2218180.2688328980.134903760.1.9927754210.0462860440.16096920849252      | ENSMUST00000018681 | ENSMUST00000018681 | Pcgf2         |
| ENSMUST00000085299 | 5854.227006 0.3715836240.186470695 1.9927186030.0462922690.1609824904842      | ENSMUST00000085299 | ENSMUST00000085299 | Daam1         |
| ENSMUST00000059331 | 1303.028330 0.409966580 0.205758741 1.9924625200.0463203330.161054976536173   | ENSMUST00000059331 | ENSMUST00000059331 | Myopb         |
| ENSMUST00000145609 | 1044.147934 -0.351916610.176621105 -1.99249466 0.0463168100.161054976536173   | ENSMUST00000145609 | ENSMUST00000145609 | Brd7          |
| ENSMUST00000152796 | 5910.934396 -0.29096710 0.146033726 -1.99246510 0.0463200500.161054976536173  | ENSMUST00000152796 | ENSMUST00000152796 | Ythdf2        |
| ENSMUST00000144229 | 565.6320770.4628041060.232289306 1.9923607900.0463314860.161085384447293      | ENSMUST00000144229 | ENSMUST00000144229 | Acrv1l        |
| ENSMUST00000134796 | 64.72311257 -0.62766587 0.315049512 -1.99227694 0.0463406800.16110897920777   | ENSMUST00000134796 | ENSMUST00000134796 | Gm15238       |
| ENSMUST00000174914 | 43.72823622 -0.782925550.392589933 -1.99222800 0.0463460470.161119268382364   | ENSMUST00000174914 | ENSMUST00000174914 | Grm15267      |
| ENSMUST00000159407 | 104.32859800.6614809260.332039997 1.9921724240.0463512140.161132087533042     | ENSMUST00000159407 | ENSMUST00000159407 | Hmgcr         |
| ENSMUST00000169966 | 467.1326424 -0.335150120.168246748 -1.99201544 0.0463699360.161183578081517   | ENSMUST00000169966 | ENSMUST00000169966 | Fxr2          |
| ENSMUST00000132742 | 1521.792700 -0.43905589 0.220422829 -1.99188032 0.0463841900.161226742328519  | ENSMUST00000132742 | ENSMUST00000132742 | NA            |
| ENSMUST00000164644 | 4413.040650 -0.39721251 0.199427020 -1.99168777 0.0463964330.161235800021281  | ENSMUST00000164644 | ENSMUST00000164644 | NA            |
| ENSMUST00000107934 | 62.66856386 0.735764537 0.369391149 1.991830440.0463896640.161235800021281    | ENSMUST00000107934 | ENSMUST00000107934 | Shank1        |
| ENSMUST00000131672 | 87.723541837 0.680587810.341695155 -1.99179825 0.0463931970.161235800021281   | ENSMUST00000131672 | ENSMUST00000131672 | Zdhhc2        |
| ENSMUST00000020926 | 192.2748820 -0.89506122 0.449379824 -1.99176993 0.0463963060.161235800021281  | ENSMUST00000020926 | ENSMUST00000020926 | Fam84a        |
| ENSMUST00000125157 | 2429.801509 -0.36493641 0.183230996 -1.99167400 0.0464068370.161263580567344  | ENSMUST00000125157 | ENSMUST00000125157 | Mrlp13        |
| ENSMUST00000113996 | 9502.0355740.3485642560.1750154271.9916201800.0464127470.161269944417897      | ENSMUST00000113996 | ENSMUST00000113996 | Itsn1         |
| ENSMUST00000122888 | 68.08769808 -0.82900240 0.416246643 -1.99161342 0.0464134890.161269944417897  | ENSMUST00000122888 | ENSMUST00000122888 | Pkp4          |
| ENSMUST00000133581 | 142.89331250.535633442 0.268947564 1.9915906010.0464159950.161270279253337    | ENSMUST00000133581 | ENSMUST00000133581 | Cep95         |
| ENSMUST00000163291 | 260.5902174 -0.38946747 0.195561818 -1.99153123 0.0464225140.161284556025982  | ENSMUST00000163291 | ENSMUST00000163291 | NA            |
| ENSMUST00000169273 | 13020.268780.3354401380.168437241.1.9914844000.0464276580.161294053296052     | ENSMUST00000169273 | ENSMUST00000169273 | Ndst1         |
| ENSMUST00000138118 | 1018.855349 -0.43439057 0.218128181 -1.99144636 0.0464318360.161300192483329  | ENSMUST00000138118 | ENSMUST00000138118 | Polr2i        |
| ENSMUST00000137901 | 901.5015379 -0.563042880.282748143 -1.99132301 0.0464453860.161338890522659   | ENSMUST00000137901 | ENSMUST00000137901 | Tfrc          |
| ENSMUST00000161737 | 1145.961645 0.434169540.218042784 1.9912126070.0464575180.161372655950434     | ENSMUST00000161737 | ENSMUST00000161737 | Hsd11b1       |
| ENSMUST00000166537 | 8630.459499 -0.29090573 0.146097830 -1.99117077 0.0464621150.1613802462203342 | ENSMUST00000166537 | ENSMUST00000166537 | Skp1a         |
| ENSMUST00000133858 | 113.07406420.5298116830.266090550 1.9910954470.0464703940.161400627242231     | ENSMUST00000133858 | ENSMUST00000133858 | A730049H05Rik |
| ENSMUST00000152360 | 127.4301953 -0.632820050.317832944 -1.99104611 0.0464758170.161411083468697   | ENSMUST00000152360 | ENSMUST00000152360 | Katnal1       |
| ENSMUST00000020768 | 83.833979650.6539565740.328482202.1.9908432460.0464981230.161480170833342     | ENSMUST00000020768 | ENSMUST00000020768 | Pgam2         |
| ENSMUST00000161890 | 43.301875220.7645377680.384039315 1.9907799460.0465050840.16149596526525      | ENSMUST00000161890 | ENSMUST00000161890 | Airn          |
| ENSMUST00000155868 | 942.72103820.3567380660.179210978 1.9906038680.0465244540.161554846746329     | ENSMUST00000155868 | ENSMUST00000155868 | Adam15        |
| ENSMUST00000164264 | 31.61787797 -0.90284878 0.453598856 -1.99041239 0.0465455250.161619626949271  | ENSMUST00000164264 | ENSMUST00000164264 | Inpp4b        |
| ENSMUST00000138746 | 2150.155959 -0.64028893 0.321695649 -1.99035621 0.0465517090.161624326907309  | ENSMUST00000138746 | ENSMUST00000138746 | Pold1         |
| ENSMUST00000303433 | 660.4449667 -0.406152400.204059646 -1.99036122 0.0465511570.161624326907309   | ENSMUST00000303433 | ENSMUST00000303433 | Rbm2c         |
| ENSMUST00000154718 | 2744.704553 -0.307537010.154516925 -1.99031283 0.0465564850.161632522868167   | ENSMUST00000154718 | ENSMUST00000154718 | Reps1         |
| ENSMUST00000113674 | 8821.340053 -0.371758520.186796515 -1.99017914 0.0465712040.161673613887787   | ENSMUST00000113674 | ENSMUST00000113674 | Drp1          |
| ENSMUST00000122233 | 9737.456124 -0.30052749 0.151006589 -1.99016145 0.0465731530.161673613887787  | ENSMUST00000122233 | ENSMUST00000122233 | Kif2a         |
| ENSMUST00000134267 | 434.81363540.4200319480.211059895 1.9901078150.0465790600.161685731850192     | ENSMUST00000134267 | ENSMUST00000134267 | Rhbdd3        |
| ENSMUST00000025853 | 8821.263072 -0.37163145 0.186742582 -1.99007343 0.0465828460.161690489795754  | ENSMUST00000025853 | ENSMUST00000025853 | Drp1          |
| ENSMUST00000109194 | 8860.3971290.3209732260.161294532 1.9899820630.0465929110.161717035590869     | ENSMUST00000109194 | ENSMUST00000109194 | Mgat1         |
| ENSMUST00000120093 | 38.04115382 0.7539431560.378881156 1.9899199060.0465997590.161724026437885    | ENSMUST00000120093 | ENSMUST00000120093 | Rpl36a-ps3    |
| ENSMUST00000139198 | 1074.152747 0.3738959700.187893536 1.9899352500.0465980680.161724026437885    | ENSMUST00000139198 | ENSMUST00000139198 | Rusc2         |
| ENSMUST00000168115 | 1628.712085 -0.365666650.183773371 -1.98976953 0.0466163280.161756364275817   | ENSMUST00000168115 | ENSMUST00000168115 | Prpsap2       |
| ENSMUST00000170632 | 323.11801180.4306096540.216410662 1.9897802090.0466151520.161756364275817     | ENSMUST00000170632 | ENSMUST00000170632 | NA            |
| ENSMUST0000097959  | 323.11801180.4306096540.216410662 1.9897802090.0466151520.161756364275817     | ENSMUST0000097959  | ENSMUST0000097959  | NA            |
| ENSMUST00000130815 | 491.9321267 -0.43257152 0.217400840 -1.98974172 0.0466193930.161758612849115  | ENSMUST00000130815 | ENSMUST00000130815 | Efcab7        |
| ENSMUST00000309005 | 7037.162549 -0.28290961 0.142193380 -1.98961172 0.0466337230.161779940255060  | ENSMUST00000309005 | ENSMUST00000309005 | Guk1          |
| ENSMUST0000016338  | 1146.031021 0.4342812020.218295517 1.9894182360.0466550580.16186325780162     | ENSMUST0000016338  | ENSMUST0000016338  | Suu72         |
| ENSMUST00000141360 | 962.2131531 -0.322095350.161906542 -1.98939061 0.0466581040.16186325780162    | ENSMUST00000141360 | ENSMUST00000141360 | Hsd11b1       |
| ENSMUST0000060992  | 88182.18291 -0.31680429 0.159247720 -1.98938042 0.0466592280.16186325780162   | ENSMUST0000060992  | ENSMUST0000060992  | Ubrn2a        |
| ENSMUST00000134327 | 1737.347127 -0.43192909 0.217120475 -1.98935218 0.0466623430.1618656715149    | ENSMUST00000134327 | ENSMUST00000134327 | Rtn4          |
| ENSMUST00000174201 | 58.25899748 -0.83599034 0.420248029 -1.98927843 0.0466704780.16188550159815   | ENSMUST00000174201 | ENSMUST00000174201 | Imp4          |
| ENSMUST00000162173 | 622.6268494 0.3263116760.164051036 1.9890863400.0466916730.161949259322011    | ENSMUST00000162173 | ENSMUST00000162173 | Glipr1        |
| ENSMUST00000138758 | 1335.215384 -0.314159120.157942882 -1.98906798 0.0466936990.161949259322011   | ENSMUST00000138758 | ENSMUST00000138758 | Zfat          |
| ENSMUST00000303099 | 63.81497823 -0.80168509 0.403074395 -1.98892587 0.0467093805.161949259322011  | ENSMUST00000303099 | ENSMUST00000303099 | 4930402H2Rik  |
| ENSMUST00000137403 | 683.1128439 -0.41403149 0.208168071 -1.98892892 0.0467090480.16198686977986   | ENSMUST00000137403 | ENSMUST00000137403 | FgfT2         |
| ENSMUST00000171666 | 1465.031359 0.3486879680.175331112 1.9887398440.0467299250.162049705281007    | ENSMUST00000171666 | ENSMUST00000171666 | Klc2          |
| ENSMUST00000146117 | 3976.638497 -0.32485459 0.163363510 -1.98853828 0.0467521890.162048941786604  | ENSMUST00000146117 | ENSMUST00000146117 | Chkb          |
| ENSMUST00000143102 | 197.4518300 -0.539027510.271064264 -1.98855986 0.0467498050.162048941786604   | ENSMUST00000143102 | ENSMUST00000143102 | Nagk          |
| ENSMUST00000161839 | 204.3153991 -0.687646020.345797205 -1.98858179 0.0467473820.162048941786604   | ENSMUST00000161839 | ENSMUST00000161839 | Reclq         |
| ENSMUST00000114303 | 342.3030251 -0.50210659 0.252492477 -1.98860021 0.0467453480.162048941786604  | ENSMUST00000114303 | ENSMUST00000114303 | Hes1          |
| ENSMUST00000130621 | 3379.2484880.2712981980.136426896 1.9885976010.0467456360.162048941786604     | ENSMUST00000130621 | ENSMUST00000130621 | H2-Ke6        |
| ENSMUST00000165980 | 781.9235922 -0.68980730.246933238 -1.98830505 0.0467779620.162165863995723    | ENSMUST00000165980 | ENSMUST00000165980 | Tmed4         |
| ENSMUST00000147872 | 270.7669446 0.549410469 0.276337410 1.9881870780.0467910030.162202671537401   | ENSMUST00000147872 | ENSMUST00000147872 | Sipi          |
| ENSMUST00000140350 | 668.4603903 0.302805401 0.152310271 1.9880826110.0468025540.162231667751219   | ENSMUST00000140350 | ENSMUST00000140350 | Mamba         |
| ENSMUST00000006073 | 235.52607320.6905086130.347326530 1.9880675760.0468042160.162231667751219     | ENSMUST00000006073 | ENSMUST00000006073 | Ttc13         |
| ENSMUST00000126856 | 97.081531920.6092204180.306473021 1.9878435470.0468289950.162309149035083     | ENSMUST00000126856 | ENSMUST00000126856 | Liph          |
| ENSMUST00000120942 | 2925.9906170.3415665200.171832216 1.9877909230.0468348180.162320921486348     | ENSMUST00000120942 | ENSMUST00000120942 | Abcb9         |
| ENSMUST00000041866 | 1114.9886000.3441845710.173156233 1.9877111190.0468436480.16233099034959      | ENSMUST00000041866 | ENSMUST00000041866 | Entpd5        |
| ENSMUST00000124944 | 601.3248638 -0.37729476 0.189814848 -1.98769889 0.0468450000.16233099034959   | ENSMUST00000124944 | ENSMUST00000124944 | Brwd3         |
| ENSMUST00000131288 | 6146.118223 -0.25972026 0.130661779 -1.98772945 0.0468416190.16233099034959   | ENSMUST00000131288 | ENSMUST00000131288 | Cstf3         |
| ENSMUST00000006837 | 8597.4327700.335305451 0.168694678 1.9876468830.04685                         |                    |                    |               |

|                    |                                                                                 |                    |                      |               |
|--------------------|---------------------------------------------------------------------------------|--------------------|----------------------|---------------|
| ENSMUST00000084206 | 831.3288363 -0.3002546(-0.151241003 -1.98527815 -0.0471135320.162957739999208   | ENSMUST00000084206 | NA                   | NA            |
| ENSMUST00000111838 | 5118.9275490.2539232270.127909328.1.9851814630.0471242850.162978084951969       | ENSMUST00000111838 | ENSMUSG00000033392   | Clasp2        |
| ENSMUST00000166734 | 5118.9275490.2539232270.127909328.1.9851814630.0471242850.162978084951969       | ENSMUST00000166734 | ENSMUSG00000033392   | Clasp2        |
| ENSMUST00000117227 | 925.1529809 -0.56658969 -0.285419511 -1.98511198 -0.0471320130.162987962479059  | ENSMUST00000117227 | NA                   | NA            |
| ENSMUST0000036865  | 925.1529809 -0.56658969 -0.285419511 -1.98511198 -0.0471320130.162987962479059  | ENSMUST0000036865  | ENSMUSG00000039187   | Fanci         |
| ENSMUST00000176343 | 2286.151997 -0.53008282 0.267034955 -1.98506903 -0.0471367910.162987962479059   | ENSMUST00000176343 | ENSMUSG00000005803   | Sqrld         |
| ENSMUST00000132856 | 192.5754428 -0.55479571 -0.279495172 -1.98499211 -0.0471453480.1630371228797027 | ENSMUST00000132856 | ENSMUSG00000020289   | NprI3         |
| ENSMUST00000106399 | 3277.087120 -0.31787896 -0.160149359 -1.98489063 -0.0471556440.163032063740336  | ENSMUST00000106399 | ENSMUSG00000106399   | Camk2d        |
| ENSMUST00000138603 | 134.6027217 -0.54518690(-0.274667271 -1.98489939 -0.0471556660.163032063740336  | ENSMUST00000138603 | ENSMUSG00000006930   | Hap1          |
| ENSMUST00000111952 | 2370.572801 -0.288306630.145250839 -1.98488787 -0.0471569470.163032063740336    | ENSMUST00000111952 | ENSMUSG00000004210   | Aggs          |
| ENSMUST0000096247  | 21662.006110.2526495220.1272902561.9848300140.0471633860.163045902166851        | ENSMUST0000096247  | NA                   | NA            |
| ENSMUST00000171343 | 1941.1232440.3182099560.1603270491.9847552740.0471717050.163066236459358        | ENSMUST00000171343 | ENSMUSG000000021796  | Bmpr1a        |
| ENSMUST00000140979 | 104.5233537 -0.79972082(-0.402942793 -1.98470066 -0.0471777840.163078826517836  | ENSMUST00000140979 | ENSMUSG000000023927  | Satb1         |
| ENSMUST00000031080 | 17089.652360.4891568060.246470891.1.9846433100.0471841700.163084050245962       | ENSMUST00000031080 | ENSMUSG000000029185  | Fam114a1      |
| ENSMUST00000350589 | 5119.1151610.2538114160.127886767.1.9846573780.0471826030.163084050245962       | ENSMUST00000350589 | NA                   | NA            |
| ENSMUST00000125303 | 11.00950896 -0.8998322410.453442604 -1.9844479350.0472059260.163150821343279    | ENSMUST00000125303 | ENSMUSG000000028441  | 1110017D15Rik |
| ENSMUST00000124653 | 780.05582230.3612138190.182031104 -1.9843521810.0472165920.1631792573443279     | ENSMUST00000124653 | ENSMUSG000000022974  | Paxbp1        |
| ENSMUST00000466373 | 19.35574007 -0.8891788180.448122619 -1.9842310560.0472300870.16320903810188     | ENSMUST00000466373 | ENSMUSG000000046373  | Iqsec3        |
| ENSMUST00000152103 | 19.35574007 -0.8891788180.448122619 -1.9842310560.0472300870.16320903810188     | ENSMUST00000152103 | ENSMUSG000000040797  | Iqsec3        |
| ENSMUST0000062147  | 65369.81059 -0.31666016 -0.159593489 -1.984167170.0472372060.163225207701866    | ENSMUST0000062147  | ENSMUSG000000062147  | Actl1         |
| ENSMUST00000060010 | 683.5055837 -0.42833694 -0.215886384 -1.98408502 -0.0472463620.163240191022476  | ENSMUST00000060010 | ENSMUSG000000060010  | Slc16a13      |
| ENSMUST00000143583 | 41.22362660.83594233660.421323975 -1.9840844950.0472464210.163240191022476      | ENSMUST00000143583 | ENSMUSG000000043583  | Bmf           |
| ENSMUST00000125997 | 141.52157000.7485496660.377305041 -1.9839376240.0472627930.163258009781299      | ENSMUST00000125997 | ENSMUSG000000025997  | Slc1a3        |
| ENSMUST00000046316 | 2737.6302010.3458752880.174338558 -1.9839288070.0472637760.163258009781299      | ENSMUST00000046316 | ENSMUSG000000046316  | Lrig2         |
| ENSMUST00000209999 | 6916.145115 -0.25336455 -0.127707454 -1.98394491 -0.0472619810.163258009781299  | ENSMUST00000209999 | ENSMUSG000000020999  | Klf3c         |
| ENSMUST00000168012 | 6916.145115 -0.25336455 -0.127707454 -1.98394491 -0.0472619810.163258009781299  | ENSMUST00000168012 | ENSMUSG000000071456  | 1110002L01Rik |
| ENSMUST00000127340 | 1999.652648 -0.40717653 -0.205232772 -1.98397423 -0.0472587110.163258009781299  | ENSMUST00000127340 | ENSMUSG000000069808  | Fam57a        |
| ENSMUST00000148228 | 546.4906732 -0.45864259 -0.231183452 -1.983890220.0472680780.16326440314959     | ENSMUST00000148228 | ENSMUSG000000028882  | Ppp1r1c       |
| ENSMUST0000097921  | 657.2942599 -0.66647032 -0.335952404 -1.98382365 -0.0472755020.163281655310546  | ENSMUST0000097921  | ENSMUSG000000028551  | Cdkn2c        |
| ENSMUST00000145559 | 1021.740060 -0.434415840.218984329 -1.983775920.0472808250.163284509689849      | ENSMUST00000145559 | ENSMUSG000000019738  | Polr2i        |
| ENSMUST0000046945  | 5372.2748320.3703435990.1866865291.9837724830.0472812090.163284509689849        | ENSMUST0000046945  | ENSMUSG000000035863  | Palin         |
| ENSMUST00000107935 | 68.97679940.7035741160.354689234 -1.9836355270.0472964850.163328838046971       | ENSMUST00000107935 | ENSMUSG000000038738  | Shank1        |
| ENSMUST00000130186 | 268.49659770.490706332 -0.2473857761.9835672830.0473040990.163328838046971      | ENSMUST00000130186 | ENSMUSG000000030186  | Ankrd16       |
| ENSMUST00000163028 | 3509.803585 -0.246548300.124299265 -1.98350568 -0.0473109720.16336205668411     | ENSMUST00000163028 | ENSMUSG0000000163028 | Tmem33        |
| ENSMUST00000002011 | 629.7115641 -0.89986945 -0.453682022 -1.983480510.0473138780.16336327291987     | ENSMUST00000002011 | ENSMUSG000000002011  | Esam          |
| ENSMUST00000107949 | 4503.954897 -0.39524272 -0.199271495 -1.983438330.04731384890.163371099706671   | ENSMUST00000107949 | ENSMUSG000000045411  | 2410002F23Rik |
| ENSMUST00000449343 | 2162.678879 -0.63924975 -0.322298865 -1.98340677 -0.0473201490.163374830620139  | ENSMUST00000449343 | ENSMUSG000000049343  | Pold1         |
| ENSMUST00000174653 | 1573.649105 -0.32190519 -0.162303364 -1.98335502 -0.0473277870.16338634333576   | ENSMUST00000174653 | ENSMUSG000000066313  | Krr1          |
| ENSMUST00000133518 | 262.20562590.5061166390.255194033 -1.9832620390.0473381670.163413746325386      | ENSMUST00000133518 | ENSMUSG0000000133518 | Dhx34         |
| ENSMUST0000065887  | 5121.8007910.3537536190.178373459 -1.9832189250.0473429800.16342178815488       | ENSMUST0000065887  | ENSMUSG000000065887  | Kif11bp       |
| ENSMUST00000071103 | 18204.92983 -0.28522239 -0.143819467 -1.98319742 -0.0473453810.16342178815488   | ENSMUST00000071103 | ENSMUSG000000071103  | Ddx1          |
| ENSMUST00000162817 | 31.41525104 -0.8295363510.416529122 -1.98296702 -0.0473711120.163453420426959   | ENSMUST00000162817 | ENSMUSG000000062817  | Fhit          |
| ENSMUST0000080074  | 2171.1927460.3568097720.1779935635 -1.9829855870.0473690390.163453420426959     | ENSMUST0000080074  | NA                   | NA            |
| ENSMUST00000168786 | 2171.1927460.3568097720.1779935635 -1.9829855870.0473690390.163453420426959     | ENSMUST00000168786 | ENSMUSG000000041115  | Iqsec2        |
| ENSMUST00000112605 | 2171.1927460.3568097720.1779935635 -1.9829855870.0473690390.163453420426959     | ENSMUST00000112605 | ENSMUSG0000000112605 | Iqsec2        |
| ENSMUST00000112604 | 2171.1927460.3568097720.1779935635 -1.9829855870.0473690390.163453420426959     | ENSMUST00000112604 | ENSMUSG000000041115  | Iqsec2        |
| ENSMUST0000072061  | 2927.2563550.3411601980.170352422 -1.9830832000.0473581360.163453420426959      | ENSMUST0000072061  | ENSMUSG000000072061  | Entpd5        |
| ENSMUST00000102738 | 2005.794877 -0.56895713 -0.286922821 -1.98296227 -0.0473716430.163453420426959  | ENSMUST00000102738 | ENSMUSG00000002738   | Kti12         |
| ENSMUST00000138608 | 1791.954254 -0.35095857 -0.176989314 -1.98293651 -0.0473745210.1634549227946    | ENSMUST00000138608 | ENSMUSG0000000138608 | Abhd12        |
| ENSMUST00000132074 | 181.1182160.4389390790.221362487 -1.9828973010.0473789020.16346160941317        | ENSMUST00000132074 | ENSMUSG000000026972  | Arrdc1        |
| ENSMUST00000148584 | 49.64003217 -0.781508380.394154897 -1.98274431 -0.0473959970.16351215845022     | ENSMUST00000148584 | ENSMUSG0000000148584 | Slc5a10       |
| ENSMUST00000107857 | 11148.19632 -0.331400320.167155639 -1.98258539 -0.0474137600.163565007510055    | ENSMUST00000107857 | ENSMUSG00000007857   | Ap2a1         |
| ENSMUST00000159652 | 427.82827900.3690485600.186159424 -1.982438370.0474308170.163606981204386       | ENSMUST00000159652 | ENSMUSG0000000159652 | Stxbp2        |
| ENSMUST00000138634 | 4450.183867 -0.30871991(-0.155727402 -1.982437970.0474302430.163606981204386    | ENSMUST00000138634 | ENSMUSG000000038634  | Nup88         |
| ENSMUST00000119014 | 1526.9305360.2967770940.1497072501.9823829040.0474360400.163617808928637        | ENSMUST00000119014 | ENSMUSG000000019014  | Pigg          |
| ENSMUST00000167721 | 144233.0652 -0.45161210 -0.227817800 -1.98233896 -0.0474413150.163626325850395  | ENSMUST00000167721 | ENSMUSG0000000167721 | Actb          |
| ENSMUST00000168246 | 65.91914397 -0.6428224450.324279618 -1.9823091180.0474446540.163629405787561    | ENSMUST00000168246 | ENSMUSG0000000168246 | NA            |
| ENSMUST00000172079 | 5101.845593 -0.314046330.158429222 -1.98225007 -0.0474512590.163635318633198    | ENSMUST00000172079 | ENSMUSG0000000172079 | Snrpe         |
| ENSMUST00000136817 | 22246.789370.4406311860.222286821 -1.9822640950.0474496900.163635318633198      | ENSMUST00000136817 | ENSMUSG0000000136817 | Lamp2         |
| ENSMUST00000074230 | 235.26842770.6884782930.347326303 -1.9822233030.0474542530.163637212357487      | ENSMUST00000074230 | ENSMUSG000000074230  | Liph          |
| ENSMUST00000101448 | 66.598035330.8304849370.489733311.9821904510.0474579280.163641453519039         | ENSMUST00000101448 | ENSMUSG0000000101448 | Drc1          |
| ENSMUST00000138666 | 568.4348876 -0.47370076 -0.238997376 -1.98203332 -0.0474755100.16367332401311   | ENSMUST00000138666 | ENSMUSG0000000138666 | Zfp961        |
| ENSMUST00000367033 | 3649.922074 -0.26651884(-0.134468207 -1.98202125 -0.0474768610.16367332401311   | ENSMUST00000367033 | ENSMUSG000000067033  | Stk3          |
| ENSMUST00000128635 | 680.4584403 -0.856965630.439259163 -1.98206885 -0.0474715350.16367332401311     | ENSMUST00000128635 | ENSMUSG0000000128635 | Acpp          |
| ENSMUST00000144754 | 2610.934419 -0.32536758 -0.164161397 -1.98199812 -0.0474794500.16367332401311   | ENSMUST00000144754 | ENSMUSG0000000144754 | Epb41         |
| ENSMUST0000028071  | 3884.037112 -0.32206132 -0.162492621 -1.98200582 -0.0474785880.16367332401311   | ENSMUST0000028071  | ENSMUSG000000028071  | Bmi1          |
| ENSMUST00000138157 | 33.34906848 -0.860580360.434203068 -1.9819766910.0474818490.16367332401311      | ENSMUST00000138157 | ENSMUSG0000000138157 | Frrm5         |
| ENSMUST00000113999 | 9783.0943970.3483665110.175782930 -1.9817994240.0475016930.163724870008075      | ENSMUST00000113999 | ENSMUSG000000013999  | Itsn1         |
| ENSMUST0000056482  | 9783.0943970.3483665110.175782930 -1.9817994240.0475016930.163724870008075      | ENSMUST0000056482  | ENSMUSG000000056482  | Itsn1         |
| ENSMUST00000110262 | 1492.827814 -0.3393545100.171247458 -1.98166158 -0.0475171290.16376963652418    | ENSMUST00000110262 | ENSMUSG000000010262  | Fastkds       |
| ENSMUST00000135773 | 2234.768060 -0.32580312 -0.164416273 -1.98157467 -0.0475268630.16379048257346   | ENSMUST00000135773 | ENSMUSG0000000135773 | 18042815Rik   |
| ENSMUST00000081794 | 9129.1433590.3180338900.160496399 -1.9815640210.0475280570.16379048257346       | ENSMUST00000081794 | ENSMUSG0000000081794 | Mga1          |
| ENSMUST00000133847 | 685.9734486 -0.54958170 -0.277361730 -1.98146192 -0.0475394950.163821409986597  | ENSMUST00000133847 | ENSMUSG0000000133847 | Rfc4          |
| ENSMUST00000128892 | 223.5942845 -0.77019911(-0.388714781 -1.98139909 -0.0475465340.163837230220764  | ENSMUST00000128892 | ENSMUSG0000000128892 | Akr1c13       |
| ENSMUST00000131601 | 544.585748 -0.41498509 -0.209457954 -1.98123340 -0.0475551040.16388279266928    | ENSMUST00000131601 | ENSMUSG0000000131601 | Tefm          |
| ENSMUST0000085399  | 11152.76415 -0.33134466 -0.167247009 -1.98116948 -0.0475722680.163909023956132  | ENSMUST0000085399  | ENSMUSG000000085399  | Ap2a1         |
| ENSMUST00000166972 | 11153.28818 -0.33129290 -0.16723632 -1.98098652 -0.0475927840.163957155234532   | ENSMUST00000166972 | ENSMUSG0000000166972 | Ap2a1         |
| ENSMUST0000050434  | 35.21310498 -0.81370246 -0.410752077 -1.98100631 -0.0475905650.163957155234532  | ENSMUST0000050434  | ENSMUSG000000050434  | Nyr           |
| ENSMUST0000026269  | 6709.4206610.2373099320.119794247 -1.9809793600.0475935980.163957155234532      | ENSMUST0000026269  | ENSMUSG000000026269  | Limd1         |
| ENSMUST00000177339 | 435.8912383 -0.53012247 -0.267609517 -1.98095522 -0.0475962950.163958039865503  | ENSMUST00000177339 | ENSMUSG0000000177339 | Cdca7l        |
| ENSMUST0000018691  | 6722.520195 -0.29461377 -0.184778291 -1.98088591 -0.0476040680.163968937512338  | ENSMUST0000018691  | ENSMUSG000000018691  | Pip4k2b       |
| ENSMUST00000122982 | 9.0056596910.8486851680.428437736 -1.9808833260.0476043590.163968937512338      | ENSMUST00000122982 | ENSMUSG0000000122982 | Tfpap2c       |
| ENSMUST00000107908 | 423.18114860.4573466160.230890481 -1.9807945920.0476143130.163986342241477      | ENSMUST0000010     |                      |               |

|                    |                                                                                |                    |                     |               |
|--------------------|--------------------------------------------------------------------------------|--------------------|---------------------|---------------|
| ENSMUST00000118155 | 8126.131378 -0.31727427 0.160448890 -1.97741642 0.0479945790.164998779648781   | ENSMUST00000118155 | ENSMUSG000000020738 | Sumo2         |
| ENSMUST00000168235 | 76.11067311 -0.87074113 0.440350183 -1.97738337 0.0479983110.16500313875523    | ENSMUST00000168235 | ENSMUST00000168235  | Ngef          |
| ENSMUST00000176066 | 1750.888010 -0.51259899 0.259239153 -1.97732088 0.0480053700.165018921807139   | ENSMUST00000176066 | ENSMUSG00000017999  | Ddx27         |
| ENSMUST00000156596 | 50.14595708 -0.87570103 0.442879533 -1.97728946 0.0480089200.1650226482419     | ENSMUST00000156596 | ENSMUST00000156596  | Sgjp1         |
| ENSMUST00000172781 | 595.4922624 0.3870597160.1957624701.977190596 0.0480200900.16504408792984      | ENSMUST00000172781 | ENSMUSG00000021287  | Xrc3          |
| ENSMUST00000109501 | 147.6317681 -0.74113453 0.374839259 -1.97720626 0.0480183190.16504408792984    | ENSMUST00000109501 | ENSMUST00000109501  | Ccdc85a       |
| ENSMUST0000045235  | 3787.952701 0.429286511 0.211733608 1.977061562 0.048034671 0.165085725939311  | ENSMUST0000045235  | ENSMUSG00000042742  | B63005N14Rik  |
| ENSMUST00000066785 | 13220.99272 0.335371775 0.169655248 1.976783965 0.048066054 0.165156281764773  | ENSMUST00000066785 | NA                  | NA            |
| ENSMUST00000172261 | 120.0304470 0.533731405 0.270000747 1.976777509 0.048066785 0.165156281764773  | ENSMUST00000172261 | ENSMUSG00000019944  | Rhobtb1       |
| ENSMUST00000122917 | 785.2778222 0.320342722 0.162053546 1.976770819 0.048067541 0.165156281764773  | ENSMUST00000122917 | ENSMUST00000122917  | Nf1           |
| ENSMUST00000130979 | 785.2778222 0.320342722 0.162053546 1.976770819 0.048067541 0.165156281764773  | ENSMUST00000130979 | ENSMUSG00000020716  | Nf1           |
| ENSMUST00000063040 | 5446.731225 -0.28717758 0.145275285 -1.97678210 0.048066265 0.165156281764773  | ENSMUST00000063040 | ENSMUST00000063040  | Mimos1        |
| ENSMUST0000029812  | 15740.94308 0.285582433 0.144475354 1.976686156 0.0480771160 0.165180699440689 | ENSMUST0000029812  | ENSMUST0000029812   | NfkB1         |
| ENSMUST00000172807 | 145.9630472 -0.55960826 0.283132669 -1.97648780 0.048099555 0.165249309157812  | ENSMUST00000172807 | ENSMUST00000172807  | Mterf3        |
| ENSMUST00000123396 | 246.6778047 -0.53112846 0.268728831 -1.97644764 0.048104100 0.165249933668672  | ENSMUST00000123396 | ENSMUSG00000015880  | Ncapg         |
| ENSMUST0000022268  | 6925.981756 -0.32354753 0.163701969 -1.97644255 0.048104675 0.165249933668672  | ENSMUST0000022268  | ENSMUST00000022148  | Pdhh          |
| ENSMUST00000134823 | 433.8381838 0.494864742 0.250385620 1.976410396 0.048108315 0.165253951276677  | ENSMUST00000134823 | ENSMUSG00000020422  | Tns3          |
| ENSMUST00000156488 | 43.9619423 -0.83802829 0.424021123 -1.97638336 0.048111374 0.16525597631997    | ENSMUST00000156488 | ENSMUST00000156488  | Ssh2          |
| ENSMUST00000135374 | 448.0777258 -0.53054776 0.268453685 -1.97631021 0.048119653 0.165275931948772  | ENSMUST00000135374 | ENSMUST00000135374  | Zfp326        |
| ENSMUST0000081929  | 212.2265241 0.501073322 0.253575976 1.976028363 0.048151564 0.165377048699894  | ENSMUST0000081929  | ENSMUST00000081929  | Gm15401       |
| ENSMUST0000047421  | 389.9001650 -0.88263243 0.446675540 -1.97600349 0.048154381 0.165378232398681  | ENSMUST0000047421  | ENSMUSG00000033191  | Tie1          |
| ENSMUST00000072775 | 628.627331 -0.45712427 0.231361466 -1.97580126 0.048172900 0.1654484020273066  | ENSMUST00000072775 | ENSMUST00000072775  | NA            |
| ENSMUST00000145991 | 401.6753632 -0.36447209 0.184475422 -1.97572167 0.048186308 0.165470899202499  | ENSMUST00000145991 | ENSMUSG00000031816  | Mthf5d        |
| ENSMUST00000070181 | 3402.8478240 0.16681934 0.210905096 1.975684521 0.0481905190 0.165478654449596 | ENSMUST00000070181 | ENSMUST00000070181  | Itihb         |
| ENSMUST00000136913 | 2234.241309 0.32518786 0.164604356 -1.97557266 0.048203197 0.16551190828258    | ENSMUST00000136913 | ENSMUST00000136913  | 281042815Rik  |
| ENSMUST00000123488 | 5445.781168 0.28679828 0.145175724 -1.97552504 0.048208595 0.16552194946716    | ENSMUST00000123488 | ENSMUST00000123488  | Mimos1        |
| ENSMUST00000031024 | 4573.312769 0.37625848 0.190467281 -1.97544944 0.048217165 0.165542881876121   | ENSMUST00000031024 | ENSMUST00000031024  | Mrp13         |
| ENSMUST00000123320 | 21329.20551 0.666531188 0.337415010 1.975404673 0.048222242 0.165551818736765  | ENSMUST00000123320 | ENSMUST00000123320  | Ctsh          |
| ENSMUST00000148648 | 357.4847419 -0.34917450 0.176765124 -1.97535858 0.048227468 0.165552772950535  | ENSMUST00000148648 | ENSMUST00000148648  | Uggt2         |
| ENSMUST00000110272 | 2928.2582240 0.340240143 0.172242038 1.975360643 0.048227235 0.165552772950535 | ENSMUST00000110272 | ENSMUST00000021236  | Entpd5        |
| ENSMUST00000111550 | 346.4688939 -0.5104966 0.258419249 -1.97527725 0.048236693 0.165575943895103   | ENSMUST00000111550 | ENSMUST0000011550   | Abli1m        |
| ENSMUST00000160833 | 1604.251353 -0.35327180 0.178856093 -1.97517340 0.048248472 0.165607882288382  | ENSMUST00000160833 | ENSMUST00000160833  | Exoc5         |
| ENSMUST00000163058 | 1879.945300 -0.33297568 0.168585635 -1.97511304 0.048255320 0.165622893646826  | ENSMUST00000163058 | ENSMUST00000163058  | Als2          |
| ENSMUST00000142257 | 140.7926788 0.610866010 0.309202702 1.975034515 0.048264231 0.165644980110979  | ENSMUST00000142257 | ENSMUST00000142257  | Slc4a3        |
| ENSMUST00000140336 | 760.37719610 0.301976374 0.152899180 1.975003226 0.048267781 0.165648706069188 | ENSMUST00000140336 | ENSMUST00000140336  | Mecp2         |
| ENSMUST00000061457 | 737.4600578 -0.52781219 0.267263468 -1.97487594 0.048282280 0.165689750719312  | ENSMUST00000061457 | ENSMUST00000061457  | Csrnp2        |
| ENSMUST00000122055 | 2913.189347 -0.27701619 0.140293496 -1.97454766 0.048319503 0.165809164213741  | ENSMUST00000122055 | ENSMUST00000122055  | Gemin7        |
| ENSMUST00000046404 | 3658.732687 -0.30118856 0.152540108 -1.97448766 0.048326319 0.165824050249191  | ENSMUST00000046404 | ENSMUST00000046404  | Ubr7          |
| ENSMUST00000123001 | 4228.277991 -0.30819641 0.156096590 -1.97439558 0.048336780 0.165851441232085  | ENSMUST00000123001 | ENSMUST00000123001  | Phb           |
| ENSMUST00000152392 | 564.0097727 0.533672977 0.270304879 1.974337192 0.048343414 0.165865699973311  | ENSMUST00000152392 | ENSMUST00000152392  | Pxd1c1        |
| ENSMUST00000129313 | 2765.979670 -0.47519982 0.240698535 -1.97425308 0.048352970 0.16588986424224   | ENSMUST00000129313 | ENSMUST00000129313  | NA            |
| ENSMUST0000026911  | 238.3769390 -0.55768601 0.282492085 -1.97416509 0.048362973 0.165915793068928  | ENSMUST0000026911  | ENSMUSG00000025804  | Ccr1          |
| ENSMUST00000136294 | 81.902836930 0.772231936 0.391183997 1.974088770 0.048371649 0.165937051960062 | ENSMUST00000136294 | ENSMUST00000136294  | C230038L03Rik |
| ENSMUST00000133064 | 4182.523332 0.548832494 0.278023083 1.974053691 0.048375638 0.16594226396343   | ENSMUST00000133064 | ENSMUST00000133064  | Eccr3         |
| ENSMUST00000168269 | 262.5987559 -0.71657224 0.363013772 -1.97395331 0.048387051 0.165927868002156  | ENSMUST00000168269 | ENSMUST00000168269  | Il7           |
| ENSMUST00000144106 | 47.3300662 -0.55130266 0.279291695 -1.97393146 0.048389535 0.165972884102      | ENSMUST00000144106 | ENSMUST00000144106  | Dtymk         |
| ENSMUST0000021084  | 8130.827531 -0.31664114 0.160416455 -1.97386946 0.048396587 0.165978267485903  | ENSMUST0000021084  | ENSMUST0000021084   | Sumo2         |
| ENSMUST00000153892 | 8130.827531 -0.31664114 0.160416455 -1.97386946 0.048396587 0.165978267485903  | ENSMUST00000153892 | ENSMUST00000153892  | Sumo2         |
| ENSMUST00000154483 | 4717.441498 0.269786260 0.13680069 1.973852240 0.048398546 0.165978267485903   | ENSMUST00000154483 | ENSMUST00000154483  | Csnk1d        |
| ENSMUST00000131356 | 544.7801398 -0.37715576 0.191084326 -1.97376606 0.048403840 0.166003376270096  | ENSMUST00000131356 | ENSMUST00000131356  | Usp16         |
| ENSMUST00000160195 | 425.0184775 0.407214672 0.206319714 1.973707036 0.048415064 0.166017898641398  | ENSMUST00000160195 | ENSMUST00000160195  | Zfp12         |
| ENSMUST00000112387 | 1323.607230 0.544450002 0.275858360 1.973657789 0.048420667 0.166021229058625  | ENSMUST00000112387 | ENSMUST00000112387  | Hyal1         |
| ENSMUST0000098098  | 2616.768730 0.279180664 0.141453637 1.973654890 0.048420997 0.166021229058625  | ENSMUST0000098098  | ENSMUST0000098098   | Rnf38         |
| ENSMUST0000069215  | 32.50314743 -0.89374292 0.452844974 -1.97361785 0.048425212 0.166027171944558  | ENSMUST0000069215  | ENSMUST0000069215   | No14          |
| ENSMUST00000124345 | 389.7125534 -0.88142805 0.446611332 -1.97359088 0.048428280 0.166029187151111  | ENSMUST00000124345 | ENSMUST00000124345  | NA            |
| ENSMUST00000161448 | 957.4598338 0.412658767 0.209097724 1.973521083 0.048436224 0.166038702266556  | ENSMUST00000161448 | ENSMUSG00000046658  | Zfp316        |
| ENSMUST00000154151 | 2917.649280 -0.32563190 0.165002141 -1.97350109 0.048438500 0.166038702266556  | ENSMUST00000154151 | ENSMUST00000154151  | Acly          |
| ENSMUST00000169630 | 856.8278342 -0.34951392 0.177102416 -1.97351304 0.048437139 0.166038702266556  | ENSMUST00000169630 | ENSMUST00000169630  | Mrgbp         |
| ENSMUST00000223334 | 4181.829327 -0.35653387 0.180667900 -1.97342126 0.048447586 0.166061344292723  | ENSMUST0000022334  | ENSMUST0000022334   | Pvr13         |
| ENSMUST00000132431 | 9221.723211 -0.29627340 0.150139640 -1.97331901 0.048452927 0.166092736871145  | ENSMUST00000132431 | ENSMUST00000132431  | Psm2a         |
| ENSMUST00000150852 | 3366.657871 -0.35593904 0.18038686 -1.97326582 0.0484652830 0.166104987152166  | ENSMUST00000150852 | ENSMUST00000150852  | Ndufv1        |
| ENSMUST00000100555 | 348.5365274 -0.69239778 0.350914544 -1.97312363 0.0484814780 0.166151979567351 | ENSMUST00000100555 | ENSMUST00000100555  | Gm7935        |
| ENSMUST0000021662  | 2928.81092 0.340037635 0.173242311 1.973037212 0.048491322 0.166168698453078   | ENSMUST0000021662  | ENSMUST0000021662   | Entpd5        |
| ENSMUST00000139830 | 132.4721120 -0.63675966 0.322729595 -1.97304390 0.048490560 0.166168698453078  | ENSMUST00000139830 | ENSMUST00000139830  | Ahrhap27      |
| ENSMUST0000042035  | 15.92564868 -0.89548259 0.453873118 -1.97298001 0.048497839 0.166182518490197  | ENSMUST0000042035  | ENSMUST0000042035   | Adgrb1        |
| ENSMUST00000098407 | 874.5323948 -0.56255876 0.285137796 -1.97293649 0.048502797 0.166191000247636  | ENSMUST00000098407 | ENSMUST00000098407  | Jam2          |
| ENSMUST00000160335 | 1203.790012 0.301680598 0.152915457 1.972858752 0.048511657 0.166197975083019  | ENSMUST00000160335 | ENSMUST00000160335  | Jam2          |
| ENSMUST00000163352 | 3348.734540 0.443840722 0.224972500 1.972866556 0.048510767 0.166197975083019  | ENSMUST00000163352 | ENSMUST00000163352  | Ccdc58        |
| ENSMUST00000139531 | 14.21259573 -0.89557965 0.453951482 -1.97285324 0.048512284 0.166197975083019  | ENSMUST00000139531 | ENSMUST00000139531  | Et14          |
| ENSMUST00000094463 | 762.020804 -0.58313108 0.295603389 -1.97268063 0.048531959 0.166230058108019   | ENSMUST00000094463 | ENSMUST00000094463  | Mp1           |
| ENSMUST00000128830 | 812.7688536 -0.60973273 0.309078627 -1.97274310 0.048524837 0.166230058108019  | ENSMUST00000128830 | ENSMUST00000128830  | Popn5         |
| ENSMUST00000136846 | 702.8006618 0.396027149 0.200752045 1.972717876 0.048527714 0.166230058108019  | ENSMUST00000136846 | ENSMUST00000136846  | Inpp4a        |
| ENSMUST00000112115 | 3444.026986 -0.35144576 0.178156021 -1.97268530 0.048531426 0.166230058108019  | ENSMUST00000112115 | ENSMUST00000112115  | Hccs          |
| ENSMUST00000134709 | 1746.418179 -0.29961536 0.151883772 -1.97266212 0.0485334069 0.166230058108019 | ENSMUST00000134709 | ENSMUST00000134709  | Cox17         |
| ENSMUST00000144726 | 231.767049 -0.53094904 0.268734210 -1.97255883 0.048539460 0.166244868623439   | ENSMUST00000144726 | ENSMUST00000144726  | Haus8         |
| ENSMUST00000109543 | 15897.95410 0.281091229 0.142500110 1.972568505 0.048544744 0.166244868623439  | ENSMUST00000109543 | ENSMUST00000109543  | Vcan          |
| ENSMUST00000144396 | 288.4888136 0.424052192 0.214973418 1.972579663 0.048543471 0.166244868623439  | ENSMUST00000144396 | ENSMUST00000144396  | Pat12         |
| ENSMUST00000035237 | 12583.27551 -0.27954767 0.141740819 -1.97224539 0.048581600 0.16638792356058   | ENSMUST00000035237 | ENSMUST00000035237  | Usp4          |
| ENSMUST00000124723 | 65.23535144 -0.77031256 0.390580981 -1.97222240 0.048584232 0.166395261703758  | ENSMUST00000124723 | ENSMUST00000124723  | Pik3cb        |
| ENSMUST00000167420 | 5124.6059790 0.252730226 0.128146314 1.972200503 0.048586722 0.166395306022435 | ENSMUST00000167420 | NA                  | NA            |
| ENSMUST00000094324 | 2153.776340 -0.48118091 0.243994583 -1.97209671 0.048598566 0.166391348024219  | ENSMUST00000094324 | ENSMUST00000094324  | Cdc25a        |
| ENSMUST00000166623 | 12.79856112 0.883724805 0.448120317 1.972070380 0.048601570 0.166393125811169  | ENSMUST00000166623 | ENSMUST00000166623  | Apol11b       |
| ENSMUST00000031097 | 1775.257262 -0.37734696 0.1913535                                              |                    |                     |               |

|                     |                                                                            |                     |                      |               |
|---------------------|----------------------------------------------------------------------------|---------------------|----------------------|---------------|
| ENSMUST00000161259  | 1249.0630220.4168987650.2117833731.9685150860.0490088020.167470306526355   | ENSMUST00000161259  | ENSMUSG00000009687   | Fxyd5         |
| ENSMUST00000139951  | 289.76097390.4952113680.2515802391.9684032800.0490216540.167505062753417   | ENSMUST00000139951  | ENSMUSG000000028766  | Alpl          |
| ENSMUST00000155919  | 3802.216340-0.319897950.162519957-1.968361080.0490265060.16751366676922    | ENSMUST00000155919  | ENSMUSG000000020097  | Sgpl1         |
| ENSMUST00000127240  | 3748.0546810.3860180810.1961216761.9682581170.0490383460.167537042732167   | ENSMUST00000127240  | ENSMUSG000000012740  | Pld3          |
| ENSMUST00000151338  | 6017.7421130.3383829520.171918461.9682758330.0490363080.167537042732167    | ENSMUST00000151338  | ENSMUSG000000026034  | Clk1          |
| ENSMUST00000164580  | 2855.4444390.2786872680.1415949361.9682008060.0490449370.167551007241194   | ENSMUST00000164580  | ENSMUSG000000016480  | Athl1         |
| ENSMUST00000223365  | 5391.5256330.4255883360.2162480061.9680566930.0490615140.16759052872517    | ENSMUST00000223365  | ENSMUSG000000022684  | Bfar          |
| ENSMUST00000136065  | 69.98635643-0.848898830.431335626-1.968070290.0490599490.16759052872517    | ENSMUST00000136065  | ENSMUSG0000000136065 | Atp13a3       |
| ENSMUST00000105525  | 2180.902458-0.297825830.151335149-1.967988520.0490693570.167608762636483   | ENSMUST00000105525  | ENSMUSG000000019986  | Ahl1          |
| ENSMUST00000092485  | 944.97551490.4671758650.2373910321.9679591960.0490727320.167611735925357   | ENSMUST00000092485  | NA                   | NA            |
| ENSMUST00000085440  | 2894.2693700.4049008730.2057541051.9678872130.0490810160.167622917901472   | ENSMUST00000085440  | NA                   | NA            |
| ENSMUST00000113231  | 7204.697187-0.267838630.136103720-1.967900920.0490794380.167622917901472   | ENSMUST00000113231  | ENSMUSG000000026254  | Eif4e2        |
| ENSMUST00000122348  | 17044.787810.2868098400.1457517251.9677972220.0490913730.167641179969426   | ENSMUST00000122348  | ENSMUSG000000023067  | Cdkn1a        |
| ENSMUST00000147511  | 734.73725990.4315121520.2192867261.9677987810.0490911940.167641179969426   | ENSMUST00000147511  | ENSMUSG000000020220  | Vps13d        |
| ENSMUST00000163098  | 580.35854180-0.503217120.255735029-1.967728570.0490992760.167659608685988  | ENSMUST00000163098  | NA                   | NA            |
| ENSMUST00000152588  | 235.34492800.5048643650.2565896491.9675944300.0491147210.167703791390228   | ENSMUST00000152588  | ENSMUSG000000008575  | Nfbf          |
| ENSMUST00000136097  | 515.20978830.3799550780.1931168961.9674874910.04912140360.16771161270998   | ENSMUST00000136097  | ENSMUSG000000038291  | Smx25         |
| ENSMUST00000002403  | 4916.4125330.3421773180.1739115581.9675363800.04912140360.16771161270998   | ENSMUST00000002403  | ENSMUSG00000002332   | Dhrs1         |
| ENSMUST0000073452   | 3600.9080470.3088409220.1569714191.9674978000.0491258490.16771161270998    | ENSMUST0000073452   | NA                   | NA            |
| ENSMUST00000148321  | 445.92324700.4883069090.2481872181.9674941850.0491262650.16771161270998    | ENSMUST00000148321  | ENSMUSG00000002107   | Celf2         |
| ENSMUST00000149953  | 468.646801-0.432721440.219978298-1.967109700.0491705640.1678516485108      | ENSMUST00000149953  | ENSMUSG000000026958  | Dpp7          |
| ENSMUST00000114468  | 663.6365347-0.449917020.228727032-1.967047880.0491776900.167867407768689   | ENSMUST00000114468  | ENSMUSG000000029822  | Ospbl3        |
| ENSMUST00000080297  | 3539.3024030.4489950300.2282619701.9670163600.0491813240.167871251328814   | ENSMUST00000080297  | NA                   | NA            |
| ENSMUST00000131498  | 365.8428147-0.890927290.452973072-1.966843830.0492021170.167930585645271   | ENSMUST00000131498  | ENSMUSG000000085996  | A830012C1Rik  |
| ENSMUST00000109794  | 12789.6180430.5032695190.2558799321.9668190290.0492040770.167931784062226  | ENSMUST00000109794  | ENSMUSG000000010830  | Kdelr3        |
| ENSMUST00000145000  | 1327.3007000.5530175680.2811890391.9667109600.0492165410.167961603367722   | ENSMUST00000145000  | ENSMUSG000000028776  | Tinag1        |
| ENSMUST00000055990  | 299.29134290.892995620.454057931-1.966699750.0492178340.167961603367722    | ENSMUST00000055990  | ENSMUSG000000016349  | Eef1a2        |
| ENSMUST00000173498  | 459.99415370.5538765430.2816484091.9665530660.0492347580.168010790002867   | ENSMUST00000173498  | ENSMUSG000000071454  | Dtnb          |
| ENSMUST00000133761  | 21.964204020.8879699150.4515441111.9665186470.0492387300.1680157751379     | ENSMUST00000133761  | ENSMUSG000000013761  | Edil3         |
| ENSMUST00000206816  | 1340.959965-0.360349440.183255252-1.966379900.0492547430.168061845533592   | ENSMUST00000206816  | ENSMUSG000000025722  | Wdr73         |
| ENSMUST0000016023   | 61.451079860.8652704020.4400573361.9662674170.0492677280.168097580611492   | ENSMUST0000016023   | ENSMUSG000000015879  | Fam184b       |
| ENSMUST00000130957  | 588.37355290.3820737100.1943327821.9660795560.0492894210.16815448533429    | ENSMUST00000130957  | NA                   | NA            |
| ENSMUST00000200877  | 2494.932784-0.325169550.165388711-1.966092770.0492878940.16815448533429    | ENSMUST00000200877  | ENSMUSG000000020561  | Twistnb       |
| ENSMUST000000951871 | 5959.1717650.3660318080.1861924901.9658784710.0493126500.16820796921595    | ENSMUST000000951871 | NA                   | NA            |
| ENSMUST00000113321  | 711.14739830.5019373240.2553235381.9658873930.0493116190.16820796921595    | ENSMUST00000113321  | ENSMUSG000000030067  | Foxp1         |
| ENSMUST00000048545  | 3525.7345620-0.341250160.173584168-1.965906010.0493094670.16820796921595   | ENSMUST00000048545  | ENSMUSG000000040459  | Arglu1        |
| ENSMUST00000156943  | 8.4540655300.8918872600.4536914721.9658453240.0493164800.16821459125778    | ENSMUST00000156943  | NA                   | NA            |
| ENSMUST00000130420  | 515.8984470-0.4045700030.205816772-1.965680610.0493355510.168268809420751  | ENSMUST00000130420  | ENSMUSG000000033389  | Arhgap44      |
| ENSMUST00000037968  | 3863.5958910-0.299407150.152331429-1.965498230.0493565990.168352139459437  | ENSMUST00000037968  | ENSMUSG000000035354  | Uvrarg        |
| ENSMUST00000140314  | 206.3062142-0.447470260.227678610-1.965359240.0493726730.168378378478036   | ENSMUST00000140314  | ENSMUSG000000044551  | 9930012K1Rik  |
| ENSMUST00000142126  | 1079.920127-0.333687570.1697866450.1965334620.0493755200.168379501630477   | ENSMUST00000142126  | ENSMUSG000000029278  | Gtpbp2        |
| ENSMUST000002024748 | 4523.2373050.3548484160.1805600111.9652658100.0493834800.16839807137582    | ENSMUST000002024748 | ENSMUSG000000023952  | Tle3          |
| ENSMUST00000162281  | 777.12615340.4747279910.2415729321.9651539050.0493964270.16843360672814    | ENSMUST00000162281  | ENSMUSG000000032280  | Zfp949        |
| ENSMUST00000161232  | 263.61162430.4471451050.2275513981.9650290360.0494108760.168474323062821   | ENSMUST00000161232  | ENSMUSG000000032425  | Ospbl3        |
| ENSMUST00000136926  | 66.88819547-0.729324390.3711967631.964791890.0494383280.168550132949540    | ENSMUST00000136926  | ENSMUSG000000029822  | Pabpn1        |
| ENSMUST00000141446  | 5411.617081-0.394684250.200881416-1.964762380.0494417450.168550513504201   | ENSMUST00000141446  | ENSMUSG000000022194  | Armt1         |
| ENSMUST00000595893  | 1614.572544-0.353916660.1801339031.964742120.0494440910.168550513504201    | ENSMUST00000595893  | ENSMUSG000000061759  | Tlcl1         |
| ENSMUST00000140379  | 260.68331730.483132750.245903218-1.964727230.0494458160.168550513504201    | ENSMUST00000140379  | ENSMUSG000000019437  | Man1b1        |
| ENSMUST00000042390  | 11359.256010.2457457010.1250746961.9647915140.0494383720.168550513504201   | ENSMUST00000042390  | ENSMUSG000000036646  | NA            |
| ENSMUST00000101203  | 9542.1498480.3659531860.1862697831.9646406370.0494558450.168576112349633   | ENSMUST00000101203  | NA                   | NA            |
| ENSMUST00000125914  | 1105.5090670-0.405482440.206393740-1.964606320.04945598190.168581072248918 | ENSMUST00000125914  | ENSMUSG000000015290  | Ubl4a         |
| ENSMUST00000148295  | 11308.733190-0.362907170.184725764-1.964572570.0494637280.168585810874184  | ENSMUST00000148295  | ENSMUSG000000032966  | Fkbp1a        |
| ENSMUST00000102637  | 5819.1042080-0.426782650.2172428480.1964541780.0494672950.168589380359597  | ENSMUST00000102637  | ENSMUSG0000000102637 | Ampd2         |
| ENSMUST00000037376  | 4318.331336-0.321609620.163722792-1.964354630.0494889800.168646216555855   | ENSMUST00000037376  | ENSMUSG000000034744  | Nagk          |
| ENSMUST000000000314 | 56.36145179-0.878445520.4471930050.1964354350.0494898010.168646216555855   | ENSMUST000000000314 | ENSMUSG0000000003035 | Cdh4          |
| ENSMUST00000031326  | 4295.762809-0.882121790.0449073092-1.964316750.0494933700.168652477623045  | ENSMUST00000031326  | ENSMUSG000000029379  | Cxc13         |
| ENSMUST00000051364  | 3337.5839160-0.282174680.134653198-1.964277100.0494979640.168651937335375  | ENSMUST00000051364  | ENSMUSG00000001364   | Gemin7        |
| ENSMUST00000054244  | 113.07953040.7423333970.3779209391.9642557990.0495004340.168659373335375   | ENSMUST00000054244  | ENSMUSG000000045608  | Ddb2          |
| ENSMUST0000023165   | 3539.8521420.4484762140.2283218061.9642285660.0495035910.168661541206313   | ENSMUST0000023165   | ENSMUSG000000022521  | Crebbp        |
| ENSMUST00000108741  | 16.67070802-0.88588530.451021932-1.964180610.0495091490.168671791164566    | ENSMUST00000108741  | ENSMUSG000000078838  | Gm17382       |
| ENSMUST00000167126  | 110.14497670.6477961690.3298098341.9641591270.0495116401.1686871791164566  | ENSMUST00000167126  | NA                   | NA            |
| ENSMUST00000156057  | 7608.8404230-0.3418070700.174057074-1.963764360.0495574240.168819167774685 | ENSMUST00000156057  | ENSMUSG000000068882  | Ssb           |
| ENSMUST00000144381  | 201.70116870-0.503124360.256220362-1.963639250.0495719410.1688600234965463 | ENSMUST00000144381  | ENSMUSG000000047063  | Osgin1        |
| ENSMUST00000099238  | 1566.2130740.2675825900.1362757741.9635374820.0495837530.168891663741293   | ENSMUST00000099238  | NA                   | NA            |
| ENSMUST00000123040  | 116.81946890.6423246570.3271347541.9634864460.0495896770.1689108201233093  | ENSMUST00000123040  | ENSMUSG000000086629  | 2810403D21Rik |
| ENSMUST00000037764  | 1560.1991110.2841907930.1447491411.9633331910.0496074710.168955250163832   | ENSMUST00000037764  | ENSMUSG000000038914  | Dido1         |
| ENSMUST00000132499  | 2107.5373010-0.357976530.1282343055-1.963203580.0496222510.168989314285514 | ENSMUST00000132499  | ENSMUSG0000000129433 | Ubp2          |
| ENSMUST00000110000  | 4853.660366-0.306367890.156054718-1.963208120.0496219960.168989314095514   | ENSMUST00000110000  | ENSMUSG000000002728  | Naa20         |
| ENSMUST00000135575  | 3366.5355690-0.300955340.1553301266-1.963162770.0496272620.16898933508933  | ENSMUST00000135575  | ENSMUSG0000000135575 | Psm5d         |
| ENSMUST00000165618  | 3822.4308530-0.267289100.136161791-1.963025770.0496431780.169042450682234  | ENSMUST00000165618  | NA                   | NA            |
| ENSMUST00000139702  | 4639.8128310-0.254840960.1298272331.962923780.0496550300.169065600838758   | ENSMUST00000139702  | ENSMUSG0000000139702 | Amfr          |
| ENSMUST00000144746  | 1418.4111940.429860210.2085070831.9629357760.0496536370.169065600838758    | ENSMUST00000144746  | ENSMUSG000000027900  | Dram2         |
| ENSMUST00000140841  | 2165.726442-0.521705680.265797421-1.962794390.0496700690.169108201233093   | ENSMUST00000140841  | ENSMUSG000000017781  | Pitpna        |
| ENSMUST00000141359  | 500.82815200.4029082670.2052858941.9626690310.0496846430.169149216131091   | ENSMUST00000141359  | ENSMUSG000000015189  | Casd1         |
| ENSMUST00000164666  | 3078.8067870.2554368790.1301538841.9625759130.0496954710.16917747260861    | ENSMUST00000164666  | ENSMUSG00000001856   | Mcc           |
| ENSMUST00000015124  | 1370.1390390.295876190.150778208-1.962327270.0497243930.169267319744174    | ENSMUST00000015124  | ENSMUSG000000015124  | Tsen15        |
| ENSMUST00000102638  | 5821.6351550.426836420.217518415-1.962300190.0497275440.169269433750516    | ENSMUST00000102638  | ENSMUSG000000027889  | Ampd2         |
| ENSMUST00000136516  | 223.61460890.495691800.252614560-1.962245570.0497338990.16928456578757     | ENSMUST00000136516  | ENSMUSG000000052446  | Zfp961        |
| ENSMUST00000144999  | 429.6006802-0.479517530.244380477-1.962176120.0497419820.1693013506197     | ENSMUST00000144999  | ENSMUSG000000036002  | Fam214b       |
| ENSMUST00000132224  | 1995.5628470.3856762250.1965718101.9620118730.0497611010.169357818052966   | ENSMUST00000132224  | ENSMUSG000000020400  | Tnsp1         |
| ENSMUST00000175645  | 4085.707944-0.433436460.220928042-1.961889780.0497753160.1693958227752     | ENSMUST00000175645  | ENSMUSG000000032058  | Ppp2r1b       |
| ENSMUST00000161519  | 406.2777167-0.373895350.1905925340.1961752350.0497913230.169426206437495   | ENSMUST00000161519  | ENSMUSG000000030145  | Zfp248        |
| ENSMUST00000115299  | 156.88620290.779489020.397342126-1.961757810.0497906870.169426206437495    | ENSMUST00000115299  | ENSMUSG000000028033  | Kcnq5         |
| ENSMUST000000060576 | 1176.241392-0.633098250.322717040-1.961775090.0497886740.169426206437495   | ENSMUST000000060576 | ENSMUSG000000060576  | Lpar4         |
| ENSMUST0000016685   | 14661.6                                                                    |                     |                      |               |
