# Supplementary material for: Cdkn2a deficiency promotes adipose tissue browning
Source: PubMed Central journal article supplement — Mol Metab. 2017 Dec 1;8:65–76. doi: 10.1016/j.molmet.2017.11.012 (PMC5985036; doi:10.1016/j.molmet.2017.11.012), 2017-12-01
Supplement: mmc4.pdf [file mmc4.pdf]

**Table S4 : List of diseases and/or biological functions associated to gene expression profiling of *Cdkn2a* +/- and +/- primary adipocytes.**

| Categories                                                                                                                                                                      | Diseases or Function                        | Predicted A | Activation z | p-Value                                                                                                                                                                                                                                                                                                                                                                                                                                                                                             | Molecules | # Molecules |
|---------------------------------------------------------------------------------------------------------------------------------------------------------------------------------|---------------------------------------------|-------------|--------------|-----------------------------------------------------------------------------------------------------------------------------------------------------------------------------------------------------------------------------------------------------------------------------------------------------------------------------------------------------------------------------------------------------------------------------------------------------------------------------------------------------|-----------|-------------|
| Carbohydrate Metabolism                                                                                                                                                         | uptake of monosaccharide                    | 0.556       | 1.67E-03     | COL5A3.DUSP9.FABP5.GATM.IGF1.IRS1.IRS2.MIF.PEA15.PPARG.PRKCA.PRKCB.RAB4A.RELA.SERPINE1.SPP1.STEAP4.AKT1.ANGPTL8.AP1S2.ARID5B.ARNTL.BNIP3.CAST.CCND1.CREBL2.DACT1.EBF2.ERO1A.Fcor.FGF10.FNDC3B.FOXC2.GATA2.GPX1.HES1.ID4.IFI16.IGF1.IRS1.IRS2.ITGA6.LAMA4.LMNA.LPIN1.LRP5.LRP6.MEDAG.MEX3C.mir-21.MKRN1.NOD1.NR4A1.NR4A3.NUDT7.PER2.PEX11A.PLAC8.PPARC.PPARGC1A.PRDM16.RARRES2.RORA.RORC.SAV1.SEMA3A.SH2B2.SMAD2.SMAD7.SNAI2.SORT1.SPP1.TIMP3.TMEM120A.TPH1.TRPM4.VEGFA.ZC3H12A.ZFP36.ZFP36L1.ZNF516 | 17        |             |
| Cellular Development. Connective Tissue Development and Function. Tissue Development                                                                                            | differentiation of adipose tissue           | 1.348       | 4.36E-03     | AKT1.ANGPTL8.AP1S2.ARID5B.ARNTL.BNIP3.CAST.CCND1.CREBL2.DACT1.EBF2.ERO1A.Fcor.FGF10.FNDC3B.FOXC2.GATA2.GPX1.HES1.ID4.IFI16.IGF1.IRS1.IRS2.ITGA6.LAMA4.LMNA.LPIN1.LRP5.LRP6.MEDAG.MEX3C.mir-21.MKRN1.NOD1.NR4A1.NR4A3.NUDT7.PER2.PEX11A.PLAC8.PPARC.PPARGC1A.PRDM16.RARRES2.RORA.RORC.SAV1.SEMA3A.SH2B2.SMAD2.SMAD7.SNAI2.SORT1.SPP1.TIMP3.TMEM120A.TPH1.TRPM4.VEGFA.ZC3H12A.ZFP36.ZFP36L1.ZNF516                                                                                                    | 64        |             |
| Cellular Development Cellular Development. Connective Tissue Development and Function. Tissue Development                                                                       | differentiation of cells                    | 1.348       | 5.47E-03     | 1.ZNF516                                                                                                                                                                                                                                                                                                                                                                                                                                                                                            | 64        |             |
| Cellular Development. Connective Tissue Development and Function. Tissue Development                                                                                            | differentiation of brown adipocytes         |             | 5.65E-03     | BNIP3.EBF2.ERO1A.ITGA6.LAMA4.NUDT7.PEX11A.PLAC8.PPARC.PPARGC1A.PRDM16.RARRES2.SH2B2.ZNF516                                                                                                                                                                                                                                                                                                                                                                                                          | 14        |             |
| Cellular Development. Connective Tissue Development and Function. Tissue Development                                                                                            | differentiation of adipocytes               | 1.156       | 6.11E-03     | AKT1.ANGPTL8.AP1S2.ARID5B.ARNTL.BNIP3.CAST.CCND1.CREBL2.DACT1.EBF2.ERO1A.Fcor.FGF10.FNDC3B.FOXC2.GATA2.GPX1.HES1.ID4.IFI16.IGF1.IRS1.IRS2.ITGA6.LAMA4.LMNA.LPIN1.LRP5.LRP6.MEDAG.MEX3C.MKRN1.NOD1.NR4A1.NR4A3.NUDT7.PER2.PEX11A.PLAC8.PPARC.PPARGC1A.PRDM16.RARRES2.RORA.RORC.SAV1.SEMA3A.SH2B2.SMAD2.SMAD7.SNAI2.SORT1.SPP1.TIMP3.TMEM120A.TPH1.TRPM4.VEGFA.ZC3H12A.ZFP36.ZFP36L1.ZNF516                                                                                                           | 63        |             |
| Lipid Metabolism. Small Molecule Biochemistry. Tissue Morphology                                                                                                                | lipolysis of white adipose tissue           | 0.152       | 6.60E-03     | IL4R.JAK2.PNPLA2.PRKAR2B.STAT6                                                                                                                                                                                                                                                                                                                                                                                                                                                                      | 5         |             |
| Connective Tissue Development and Function. Tissue Morphology Hematological System Development and Function. Immune Cell Trafficking. Inflammatory Response. Tissue Development | quantity of adipose tissue                  | -0.788      | 8.44E-03     | ACACB.ACADL.ADAM12.AEBP1.AKT1.ANGPTL4.ARID5B.ARNTL.ASPA.B4GALT1.BRCA1.C3.CAV1.CNR1.COL5A3.DGAT2.DUSP1.EIF4EBP1.FABP5.FASN.FMO5.FOXC2.GATM.GPD2.HEXB.ID1.ID4.IGF1.INSR.IRS1.IRS2.KDM3A.LGI1.LMNA.MAF1.MFSD2A.Mt1.Mt2.MTTP.NOS2.NR1H2.NR3C1.PNPLA2.PPARC.PPARGC1A.PPARGC1B.PRKAR2B.PRKCB.Ptprd.RAE1.RBL1.RBM38.SCP2.SERPINE1.SGMS1.SIRT3.SIRT7.SLC12A2.SLC25A25.SOCS3.SPARC.STEAP4.ZNF521                                                                                                             | 63        |             |
| Connective Tissue Development and Function. Tissue Morphology                                                                                                                   | accumulation of macrophages                 | 1.000       | 8.96E-03     | CD40.CD44.MIF.STAT3                                                                                                                                                                                                                                                                                                                                                                                                                                                                                 | 4         |             |
| Connective Tissue Development and Function. Tissue Morphology                                                                                                                   | quantity of subcutaneous fat                | 0.728       | 1.36E-02     | ACACB.ARNTL.B4GALT1.BRCA1.CAV1.COL5A3.DGAT2.FABP5.FMO5.GATM.LMNA.MAF1.PPARC.Ptprd.RAE1.SERPINE1.SIRT7.STEAP4                                                                                                                                                                                                                                                                                                                                                                                        | 18        |             |
| Connective Tissue Disorders. Organismal Injury and Abnormalities                                                                                                                | abnormality of adipose tissue               | -0.843      | 1.66E-02     | ABCA1.ADIPOR2.AEBP1.ARID5B.CAV1.CD44.CLCN3.FGF10.FMO5.IGF1.IGFBP3.IGFBP4.IL33.IRS1.KDM3A.LEF1.NR1I3.OSMR.PITPNA.PNPLA2.PPARC.PPARGC1A.PPARGC1B.PTGER4.Ptprd.PTTG1.RBL1.SC5D.SERPINE1.SLC2A1.SPP1.SPRY1.STAT3.STAT6.STEAP4.TGFA.VEGFA.ZFP36                                                                                                                                                                                                                                                          | 38        |             |
| Carbohydrate Metabolism. Molecular Transport. Small Molecule Biochemistry                                                                                                       | uptake of D-glucose                         | -0.201      | 1.71E-02     | COL5A3.DUSP9.FABP5.GATM.IRS2.MIF.PEA15.PPARC.PRKCA.RELA.SERPINE1.STEAP4                                                                                                                                                                                                                                                                                                                                                                                                                             | 12        |             |
| Lipid Metabolism. Small Molecule Biochemistry                                                                                                                                   | storage of lipid                            | -1.067      | 2.23E-02     | CISD1.LPIN1.NR1H2.PPARC                                                                                                                                                                                                                                                                                                                                                                                                                                                                             | 4         |             |
| Carbohydrate Metabolism. Molecular Transport. Small Molecule Biochemistry                                                                                                       | uptake of 2-deoxyglucose                    | 1.172       | 2.77E-02     | IGF1.IRS1.PRKCA.PRKCB.RAB4A.SPP1                                                                                                                                                                                                                                                                                                                                                                                                                                                                    | 6         |             |
| Cellular Growth and Proliferation                                                                                                                                               | proliferation of cells                      | 0.478       | 3.19E-02     | BGN.FGF10.FGFR1.FOXC2.IGF1.IL33.PPARC.SMAD7.STAT3                                                                                                                                                                                                                                                                                                                                                                                                                                                   | 9         |             |
| Connective Tissue Development and Function. Tissue Morphology                                                                                                                   | quantity of white adipose tissue            | -0.917      | 3.42E-02     | AEBP1.AKT1.ARID5B.C3.CAV1.EIF4EBP1.GATM.GPD2.IRS1.IRS2.KDM3A.LMNA.MAF1.NOS2.PNPLA2.PPARC.PPARGC1B.PRKAR2B.RBL1.SGMS1.ZNF521                                                                                                                                                                                                                                                                                                                                                                         | 21        |             |
| Connective Tissue Disorders. Organismal Injury and Abnormalities. Tissue Morphology                                                                                             | abnormal morphology of white adipose tissue |             | 3.91E-02     | AEBP1.IGF1.KDM3A.PNPLA2.PPARGC1B.RBL1.STEAP4                                                                                                                                                                                                                                                                                                                                                                                                                                                        | 7         |             |

|                                                                                                                         |                                                  |        |          |                                                          |        |
|-------------------------------------------------------------------------------------------------------------------------|--------------------------------------------------|--------|----------|----------------------------------------------------------|--------|
| Hematological Disease.<br>Metabolic Disease<br>Cardiovascular System<br>Development and Function.                       | dyslipidemia                                     |        | 4.23E-02 | LPIN1.NR4A3.PPARG.PPARGC1A.PPARGC1B.RORA                 | 6      |
| Organismal Development<br>Connective Tissue<br>Development and Function.                                                | vasculogenesis                                   |        | 4.32E-02 | IGF1.IGFBP4.KDR.VEGFA                                    | 4      |
| Tissue Development<br>Cell Morphology. Connective<br>Tissue Development and<br>Function. Tissue Morphology              | development of fat<br>pad                        |        | 4.66E-02 | CAV1.VEGFA                                               | 2      |
| Cell Morphology. Connective<br>Tissue Development and<br>Function. Tissue Morphology                                    | diameter of<br>adipocytes                        |        | 4.66E-02 | CAV1.SPARC                                               | 2      |
| Cell Morphology. Connective<br>Tissue Development and<br>Function. Tissue Morphology                                    | enlargement of<br>adipocytes                     |        | 4.66E-02 | LPIN1.MEST                                               | 2      |
| Digestive System<br>Development and Function                                                                            | ingestion by mice<br>interphase of<br>adipocytes |        | 4.66E-02 | ARNTL.PNPLA2                                             | 2      |
| Cell Cycle<br>Organismal Development                                                                                    | lean body mass                                   |        | 4.66E-02 | FOXC2.IRS1<br>GIPR.PNPLA2                                | 2<br>2 |
| Cell Death and Survival<br>Cardiovascular System<br>Development and Function.                                           | repopulation of cells                            |        | 4.66E-02 | MFGE8.PIN1                                               | 2      |
| Cell Morphology. Organismal<br>Development                                                                              | sprouting of capillary<br>vessel                 |        | 4.66E-02 | IGF1.IGFBP4                                              | 2      |
| Lipid Metabolism. Small<br>Molecule Biochemistry                                                                        | storage of fat                                   |        | 4.66E-02 | LPIN1.NR1H2                                              | 2      |
| Cellular Development. Cellular<br>Growth and Proliferation.<br>Connective Tissue<br>Development and Function.           | proliferation of<br>adipocytes                   | 0.000  | 4.83E-02 | BGN.FGF10.FGFR1.FOXC2.IGF1.PPARG.SMAD7.STAT3             | 8      |
| Connective Tissue Disorders.<br>Inflammatory Response.<br>Organismal Injury and<br>Abnormalities. Tissue<br>Development | inflammation of<br>adipose tissue                | -1.744 | 4.86E-02 | ADIPOR2.CD44.IL33.OSMR.PTGER4.SPP1.SPRY1.STAT3.AT6.VEGFA | 10     |
