# Supplementary material for: Cdkn2a deficiency promotes adipose tissue browning
Source: PubMed Central journal article supplement — Mol Metab. 2017 Dec 1;8:65–76. doi: 10.1016/j.molmet.2017.11.012 (PMC5985036; doi:10.1016/j.molmet.2017.11.012), 2017-12-01
Supplement: mmc5.pdf [file mmc5.pdf]

**Table S5 : List of oligonucleotides used in qRT-PCR analyses.**

| Gene name                                                                      | Gene symbol       | Species | Primer                          |
|--------------------------------------------------------------------------------|-------------------|---------|---------------------------------|
| cyclin-dependent kinase inhibitor 2A                                           | <i>p16Ink4a_F</i> | mouse   | CGTGTGCATGACGTGCGGG             |
| cyclin-dependent kinase inhibitor 2A                                           | <i>p16Ink4a_R</i> | mouse   | CCAGCGTGTCCAGGAAGCCT            |
| cyclin-dependent kinase inhibitor 2A                                           | <i>p19Arf_F</i>   | mouse   | GAGCATGGGTCGCAGGTTCTTGG         |
| cyclin-dependent kinase inhibitor 2A                                           | <i>p19Arf_R</i>   | mouse   | GCTACGTGAACGTTGCCATCA           |
| uncoupling protein 1 (mitochondrial, proton carrier)                           | <i>Ucp1_F</i>     | mouse   | TCCTAGGGACCATCACCACCC           |
| uncoupling protein 1 (mitochondrial, proton carrier)                           | <i>Ucp1_R</i>     | mouse   | AGCCGGCTGAGATCTTGTTC            |
| PR domain containing 16                                                        | <i>Prdm16_F</i>   | mouse   | CGT CCA CAC GGA AGA GCG TGA     |
| PR domain containing 16                                                        | <i>Prdm16_R</i>   | mouse   | TGG AGG TTG CTG GGG TCC GT      |
| peroxisome proliferative activated receptor, gamma, coactivator 1 alpha        | <i>Ppargc1a_F</i> | mouse   | GAAAACAGGAACAGCAGCAGAG          |
| peroxisome proliferative activated receptor, gamma, coactivator 1 alpha        | <i>Ppargc1a_R</i> | mouse   | GGGTCAGAGGAAGAGATAAAG           |
| transcription factor A, mitochondrial                                          | <i>Tfam_F</i>     | mouse   | GCTCTACACGCCCTGGTTTCTGG         |
| transcription factor A, mitochondrial                                          | <i>Tfam_R</i>     | mouse   | TCGCTGTAGTGCCTGCTGCTCCTG        |
| cytochrome c oxidase subunit Va                                                | <i>Cox5a_F</i>    | mouse   | TTGATGCCTGGGAATTGCGTAAAG        |
| cytochrome c oxidase subunit Va                                                | <i>Cox5a_R</i>    | mouse   | AACAACCTCCAAGATGCGAACAG         |
| elongation of very long chain fatty acids (FEN1/Elo2, SUR4/Elo3, yeast)-like 3 | <i>Elovl3_F</i>   | mouse   | TCC GCG TTC TCA TGT AGG TCT     |
| elongation of very long chain fatty acids (FEN1/Elo2, SUR4/Elo3, yeast)-like 3 | <i>Elovl3_R</i>   | mouse   | GGA CCT GAT GCA ACC CTA TGA     |
| patatin-like phospholipase domain containing 2 (Pnpla2), mRNA                  | <i>Atgl_F</i>     | mouse   | CAACGCCACTCACATCACGG            |
| patatin-like phospholipase domain containing 2 (Pnpla2), mRNA                  | <i>Atgl_R</i>     | mouse   | GGACACCTCAATAATGTTGGCAC         |
| cell death-inducing DNA fragmentation factor, alpha subunit-like effector A    | <i>Cidea_F</i>    | mouse   | TGC TCT TCT GTA TCG CCC AGT     |
| cell death-inducing DNA fragmentation factor, alpha subunit-like effector A    | <i>Cidea_R</i>    | mouse   | GCC GTG TTA AGG AAT CTG CTG     |
| solute carrier family 2 (facilitated glucose transporter), member 4 (Slc2a4)   | <i>Slc2a4_F</i>   | mouse   | GAC CGG ATT CCA TCC CAC AAG G   |
| solute carrier family 2 (facilitated glucose transporter), member 4 (Slc2a4)   | <i>Slc2a4_R</i>   | mouse   | TGA GTA TCT CAT AGG AGG CCG CGG |
| pyruvate dehydrogenase kinase, isoenzyme 4 (Pdk4), mRNA                        | <i>Pdk4_F</i>     | mouse   | TTCCAGGCCAACCAATCCACA           |
| pyruvate dehydrogenase kinase, isoenzyme 4 (Pdk4), mRNA                        | <i>Pdk4_R</i>     | mouse   | TCTTGATGCTCGACCGTGGC            |
| deiodinase, iodothyronine, type II, mRNA                                       | <i>Dio2_F</i>     | mouse   | CAGTGTGGTGCACGTCTCCAA TC        |
| deiodinase, iodothyronine, type II, mRNA                                       | <i>Dio2_R</i>     | mouse   | TGAACCAAAGTTGACCACCAG           |
| fatty acid binding protein 4, adipocyte                                        | <i>Fabp4_F</i>    | mouse   | TGGTGACAAGCTGGTGGTGAATG         |
| fatty acid binding protein 4, adipocyte                                        | <i>Fabp4_R</i>    | mouse   | TCCAGGCCTCTTCTTTGGCTCA          |
| cytochrome c oxidase subunit VIIIb (Cox8b)                                     | <i>Cox8b_F</i>    | mouse   | GAA CCA TGA AGC CAA CGA CT      |
| cytochrome c oxidase subunit VIIIb (Cox8b)                                     | <i>Cox8b_R</i>    | mouse   | GCG AAG TTC ACA GTG GTT CC      |
| uncoupling protein 1 (mitochondrial, proton carrier)                           | <i>UCP1_F</i>     | human   | GTGTGCCCAACTGTGCAATG            |
| uncoupling protein 1 (mitochondrial, proton carrier)                           | <i>UCP1_R</i>     | human   | CCAGGATCCAAGTCGCAAGA            |
| TATA-binding protein                                                           | <i>TBP_F</i>      | human   | ACGCCAGCTTCGGAGAGTTC            |
| TATA-binding protein                                                           | <i>TBP_R</i>      | human   | CAAACCCGCTTGGGATTATATTCG        |
